# Supplementary material for: Impact of disinvestment from weekend allied health services across acute medical and surgical wards: 2 stepped-wedge cluster randomised controlled trials
Source: PLoS Med. 2017 Oct 31;14(10):e1002412. doi: 10.1371/journal.pmed.1002412 (PMC5663333; doi:10.1371/journal.pmed.1002412)
Supplement: S2 Data — (XLSX) [file pmed.1002412.s002.xlsx]

## Sheet: Sheet1
episodenumber	age	seasonal_mean_los	acute_los	real_los_greater_elos	sw_step	death_ae	dvt	fall	met_blue	pe	pressure	icu_tf_ae	any_ae	unplanned_readmit28_good	old_we_exposure	no_we_exposure	new_we_exposure	UR_number redacted for patient privacy	hithlosdays	losdays	dhvicavglos	gender	separationmethod	drg	dowdischarge	ahcontactflag	any_ae_binary	study1	study2	major_complexity	site	index_ward	brief_drg	year	hospital	patientnumber	encounternumber	admitdatetime	dischdatetime	los	totalcost
3454340	52	3.74	1.42188	1	8	0	0	0	0	0	0	0	0	0	0	1	0		0	0	1.41667	Male	Private residence/accommodation	D12B	Wednesday	N	0	0	1	0	1	1	D12	Costing 2014-2015	Dandenong	821398	8500000	41883.6	41885	2	4466.54
3468754	65	2.95	6.37891	1	8	0	0	0	0	0	0	0	0	0	0	1	0		4.15278	5980	2.22222	Female	Private residence/accommodation	X07B	Monday	Y	0	0	1	0	1	1	X07	Costing 2014-2015	Dandenong	7900000	8600000	41905.3	41911.7	4	5436.1
3465413	88	2.95	1.98438	0	8	0	0	0	0	0	0	0	0	0	0	1	0		0	0	10.212	Male	Other acute hosp/ext care/rehab/geri ctr	I77A	Friday	Y	0	0	1	1	1	1	I77	Costing 2014-2015	Dandenong	4100000	8600000	41899.8	41901.8	2	2034.46
3455320	40	3.74	1.09375	1	8	0	0	0	0	0	0	0	0	0	0	1	0		0	0	1.08333	Male	Private residence/accommodation	D04Z	Wednesday	N	0	0	1	0	1	1	D04	Costing 2014-2015	Dandenong	7900000	8500000	41884.3	41885.4	1	7768.65
3454799	34	3.74	1.09766	1	8	0	0	0	0	0	0	0	0	0	0	1	0		0	0	0.875916	Male	Private residence/accommodation	X60B	Wednesday	N	0	0	1	0	1	1	X60	Costing 2014-2015	Dandenong	7900000	8500000	41884.4	41885.5	1	1727.63
3459492	21	2.95	1.21094	0	8	0	0	0	0	0	0	0	0	0	0	1	0		0	0	2.21439	Female	Private residence/accommodation	N08Z	Wednesday	N	0	0	1	0	1	1	N08	Costing 2014-2015	Dandenong	7900000	8600000	41891.2	41892.4	1	4432.22
3454766	43	3.74	20.3867	0	8	0	0	0	0	0	0	0	0	0	0	1	0		9.0375	13014	11.3375	Male	Private residence/accommodation	X07A	Monday	Y	0	0	1	1	1	1	X07	Costing 2014-2015	Dandenong	1000000	8500000	41884.3	41904.7	20	22561.1
3469316	29	2.95	0.929688	0	8	0	0	0	0	0	0	0	0	0	0	1	0		0	0	1.85047	Female	Private residence/accommodation	O61Z	Wednesday	N	0	0	1	0	1	1	O61	Costing 2014-2015	Dandenong	7900000	8600000	41905.8	41906.7	1	1452.74
3475220	22	2.95	0.792969	0	8	0	0	0	0	0	0	0	0	0	0	1	0		0	0	1.41541	Male	Private residence/accommodation	B07B	Friday	N	0	0	1	0	1	1	B07	Costing 2014-2015	Dandenong	2500000	8600000	41914.5	41915.3	1	2768.51
3467266	36	2.95	1.22266	0	8	0	0	0	0	0	0	0	0	0	0	1	0		0	0	1.67275	Female	Private residence/accommodation	G11Z	Sunday	N	0	0	1	0	1	1	G11	Costing 2014-2015	Dandenong	4400000	8600000	41902.2	41903.4	1	2704.77
3476191	25	2.72	1.84375	0	8	0	0	0	0	0	0	0	0	1	0	1	0		0	0	2.84166	Female	Private residence/accommodation	I18Z	Sunday	N	0	0	1	0	1	1	I18	Costing 2014-2015	Dandenong	4200000	8600000	41915.8	41917.6	2	2858.49
3454639	86	3.74	9.6875	1	8	0	0	0	1	0	0	0	1	1	0	1	0		0	0	7.77083	Female	Private residence/accommodation	B64A	Thursday	Y	1	0	1	1	1	1	B64	Costing 2014-2015	Dandenong	7900000	8500000	41884	41893.7	9	13011.3
3471686	75	2.95	3.07422	0	8	0	0	0	0	0	0	0	0	0	0	1	0		0	0	3.08333	Female	Private residence/accommodation	D14B	Monday	N	0	0	1	0	1	1	D14	Costing 2014-2015	Dandenong	7900000	8600000	41908.4	41911.5	3	6157.08
3467880	50	2.95	16.7617	1	8	0	0	0	1	0	0	0	1	0	0	1	0		0	0	16.75	Male	Statistical Separation	A06C	Wednesday	Y	1	0	1	0	1	1	A06	Costing 2014-2015	Dandenong	4600000	8600000	41903.7	41920.4	17	47224.9
3464168	42	2.95	2.51172	0	8	0	0	0	0	0	0	0	0	0	0	1	0		0	0	3.12541	Female	Private residence/accommodation	H08B	Thursday	N	0	0	1	0	1	1	H08	Costing 2014-2015	Dandenong	498268	8600000	41898	41900.5	2	6011.33
3472902	60	2.95	2.07813	0	8	0	0	0	0	0	0	0	0	0	0	1	0		0	0	2.08333	Female	Private residence/accommodation	K06B	Wednesday	N	0	0	1	0	1	1	K06	Costing 2014-2015	Dandenong	2500000	8600000	41911.4	41913.5	2	10967.5
3456227	84	3.74	3.79688	0	8	0	0	0	0	0	0	0	0	0	0	1	0		0	0	5.5028	Female	Statistical Separation	I03B	Sunday	N	0	0	1	0	1	1	I03	Costing 2014-2015	Dandenong	2200000	8600000	41885.9	41889.7	4	13169
3456254	70	3.74	14.75	1	8	0	0	0	0	0	0	0	0	1	0	1	0		0	0	2.64898	Male	Private residence/accommodation	F65B	Thursday	Y	0	0	1	0	1	1	F65	Costing 2014-2015	Dandenong	1000000	8600000	41885.9	41900.7	15	15907
3468549	64	2.95	3.76172	0	8	0	0	0	0	0	0	0	0	0	0	1	0		0	0	5.97146	Female	Private residence/accommodation	T61A	Friday	Y	0	0	1	1	1	1	T61	Costing 2014-2015	Dandenong	2000000	8600000	41904.7	41908.4	4	3349.26
3468227	39	2.95	1.03516	1	8	0	0	0	0	0	0	0	0	0	0	1	0		0	0	1	Male	Left against Medical Advice	I30Z	Tuesday	N	0	0	1	0	1	1	I30	Costing 2014-2015	Dandenong	2100000	8600000	41904.4	41905.4	1	2865.58
3475369	65	2.95	6.875	0	8	0	0	0	0	0	0	0	0	0	0	1	0		0	0	6.875	Male	Other acute hosp/ext care/rehab/geri ctr	D66A	Thursday	Y	0	0	1	1	1	1	D66	Costing 2014-2015	Dandenong	7900000	8600000	41914.8	41921.7	7	19895.5
3469557	29	2.95	3.50391	0	8	0	0	0	0	0	0	0	0	1	0	1	0		0	0	5.07703	Male	Private residence/accommodation	X06A	Saturday	Y	0	0	1	1	1	1	X06	Costing 2014-2015	Dandenong	4000000	8600000	41906.1	41909.6	3	5491.52
3473395	23	2.95	4.05469	0	8	0	0	0	0	0	0	0	0	0	0	1	0		0	0	4.08333	Male	Private residence/accommodation	X02B	Saturday	N	0	0	1	0	1	1	X02	Costing 2014-2015	Dandenong	7900000	8600000	41912.3	41916.4	4	8004.8
3455420	94	3.74	20.3789	1	8	0	0	0	1	0	0	1	2	0	0	1	0		0	0	20.375	Female	Statistical Separation	X07A	Tuesday	Y	1	0	1	1	1	1	X07	Costing 2014-2015	Dandenong	285777	8500000	41885.1	41905.5	20	33440.6
3458237	25	2.95	0.890625	1	8	0	0	0	0	0	0	0	0	0	0	1	0		0	0	0.875	Male	Private residence/accommodation	D12A	Sunday	N	0	0	1	1	1	1	D12	Costing 2014-2015	Dandenong	7900000	8600000	41888.9	41889.8	1	2012.98
3468163	34	2.95	1.08594	0	8	0	0	0	0	0	0	0	0	0	0	1	0		0	0	1.125	Female	Private residence/accommodation	D12B	Tuesday	Y	0	0	1	0	1	1	D12	Costing 2014-2015	Dandenong	7200000	8600000	41904.3	41905.4	1	3119.14
3463595	28	2.95	6.17969	1	8	0	0	0	0	0	0	0	0	0	0	1	0		0	0	6.16667	Male	Left against Medical Advice	X07A	Sunday	Y	0	0	1	1	1	1	X07	Costing 2014-2015	Dandenong	2500000	8600000	41897.5	41903.6	6	7972.65
3454418	57	3.74	6.95703	0	8	0	0	0	0	0	0	0	0	0	0	1	0		0	0	6.95833	Male	Private residence/accommodation	X06B	Monday	N	0	0	1	0	1	1	X06	Costing 2014-2015	Dandenong	7000000	8500000	41883.7	41890.7	7	7941.32
3470213	46	2.95	3.30469	0	8	0	0	0	0	0	0	0	0	0	0	1	0		0	0	3.33333	Female	Private residence/accommodation	N04A	Sunday	Y	0	0	1	1	1	1	N04	Costing 2014-2015	Dandenong	896848	8600000	41907.3	41910.6	3	10447
3468853	45	2.95	1.27344	1	8	0	0	0	0	0	0	0	0	0	0	1	0		0	0	1.25	Male	Private residence/accommodation	D14B	Wednesday	N	0	0	1	0	1	1	D14	Costing 2014-2015	Dandenong	480223	8600000	41905.3	41906.6	1	5260.06
3459343	59	2.95	2.75781	0	8	0	0	0	0	0	0	0	0	0	0	1	0		0	0	4.31022	Female	Private residence/accommodation	J08A	Thursday	N	0	0	1	1	1	1	J08	Costing 2014-2015	Dandenong	4500000	8600000	41890.6	41893.4	3	5721.58
3467864	23	2.95	0.96875	1	8	0	0	0	0	0	0	0	0	0	0	1	0		0	0	0.958333	Male	Private residence/accommodation	X07A	Monday	N	0	0	1	1	1	1	X07	Costing 2014-2015	Dandenong	7900000	8600000	41903.5	41904.5	1	6339.24
3457890	24	2.95	3.1875	1	8	0	0	0	0	0	0	0	0	0	0	1	0		0	0	3.16667	Female	Private residence/accommodation	X06A	Tuesday	N	0	0	1	1	1	1	X06	Costing 2014-2015	Dandenong	445143	8600000	41888.3	41891.5	3	4245.05
3459306	66	2.95	1.26563	0	8	0	0	0	0	0	0	0	0	1	0	1	0		0	0	1.29167	Male	Private residence/accommodation	J11Z	Tuesday	N	0	0	1	0	1	1	J11	Costing 2014-2015	Dandenong	854046	8600000	41890.4	41891.7	1	2580.89
3474937	52	2.95	5.32422	0	8	0	0	0	0	0	0	0	0	0	0	1	0		0	0	6.68683	Male	Mental health residential facility	X60A	Tuesday	Y	0	0	1	1	1	1	X60	Costing 2014-2015	Dandenong	2100000	8600000	41914.3	41919.6	5	7719.86
3459373	41	2.95	4.10938	1	8	0	0	0	1	0	0	0	1	0	0	1	0		0	0	4.08333	Female	Private residence/accommodation	N04A	Saturday	Y	1	0	1	1	1	1	N04	Costing 2014-2015	Dandenong	4600000	8600000	41891.3	41895.4	4	8681.81
3459533	74	2.95	0.871094	0	8	0	0	0	0	0	0	0	0	0	0	1	0		0	0	2.63327	Female	Private residence/accommodation	G61B	Tuesday	N	0	0	1	0	1	1	G61	Costing 2014-2015	Dandenong	4100000	8600000	41891	41891.8	1	952.992
3471029	38	2.95	2.66797	1	8	0	0	0	0	0	0	0	0	0	0	1	0		0	0	2.66667	Male	Private residence/accommodation	D04Z	Sunday	N	0	0	1	0	1	1	D04	Costing 2014-2015	Dandenong	356137	8600000	41907.9	41910.5	3	10030
3459900	85	2.95	22.7031	0	8	0	0	0	0	0	0	1	1	0	0	1	0		0	0	22.7083	Male	Other acute hosp/ext care/rehab/geri ctr	A06A	Thursday	Y	1	0	1	1	1	1	A06	Costing 2014-2015	Dandenong	4500000	8600000	41891.7	41914.4	23	82699.2
3459963	40	2.95	1.70703	1	8	0	0	0	0	0	0	0	0	0	0	1	0		0	0	0.963204	Male	Private residence/accommodation	X60B	Thursday	N	0	0	1	0	1	1	X60	Costing 2014-2015	Dandenong	334614	8600000	41891.8	41893.5	2	2682.9
3457075	67	3.74	2.20703	0	8	0	0	0	0	0	0	0	0	0	0	1	0		0	0	2.20833	Female	Private residence/accommodation	N04B	Sunday	N	0	0	1	0	1	1	N04	Costing 2014-2015	Dandenong	235509	8600000	41887.3	41889.5	2	6433.66
3460465	41	2.95	2.02344	1	8	0	0	0	0	0	0	0	0	0	0	1	0		0	0	1.39595	Female	Private residence/accommodation	I30Z	Friday	Y	0	0	1	0	1	1	I30	Costing 2014-2015	Dandenong	2500000	8600000	41892.5	41894.5	2	4571.15
3460234	25	2.95	0.851563	1	8	0	0	0	0	0	0	0	0	0	0	1	0		0	0	0.833333	Male	Private residence/accommodation	D12B	Wednesday	N	0	0	1	0	1	1	D12	Costing 2014-2015	Dandenong	7300000	8600000	41892	41892.9	1	1910.45
3461114	90	2.95	6.35547	1	8	0	0	0	0	0	0	0	0	0	0	1	0		0	0	6.33333	Female	Other acute hosp/ext care/rehab/geri ctr	J13B	Wednesday	Y	0	0	1	0	1	1	J13	Costing 2014-2015	Dandenong	392624	8600000	41893.3	41899.7	6	9985.27
3466704	79	2.95	6.32422	0	8	0	0	0	0	0	0	0	0	1	0	1	0		0	0	11.7205	Female	Private residence/accommodation	X07A	Thursday	Y	0	0	1	1	1	1	X07	Costing 2014-2015	Dandenong	7800000	8600000	41901.4	41907.7	6	7243.35
3456222	49	3.74	10.625	1	8	0	0	0	0	0	0	0	0	0	0	1	0		0	0	5.60881	Female	Private residence/accommodation	J08A	Sunday	N	0	0	1	1	1	1	J08	Costing 2014-2015	Dandenong	7800000	8600000	41885.8	41896.5	11	13692.8
3463779	21	2.95	0.867188	0	8	0	0	0	0	0	0	0	0	1	0	1	0		0	0	1.85862	Female	Private residence/accommodation	L63B	Tuesday	N	0	0	1	0	1	1	L63	Costing 2014-2015	Dandenong	2400000	8600000	41897.6	41898.5	1	1078.86
3469588	80	2.95	20.4258	1	8	0	0	0	0	0	0	0	0	0	0	1	0		0	0	5.98286	Female	Private residence/accommodation	G65A	Tuesday	Y	0	0	1	1	1	1	G65	Costing 2014-2015	Dandenong	7900000	8600000	41906.1	41926.6	20	24479.8
3469760	48	2.95	2.00391	1	8	0	0	0	0	0	0	0	0	0	0	1	0		0	0	2	Female	Private residence/accommodation	D05Z	Friday	N	0	0	1	0	1	1	D05	Costing 2014-2015	Dandenong	420789	8600000	41906.4	41908.5	2	9036.74
3471814	90	2.95	1.58203	0	8	0	0	0	0	0	0	0	0	0	0	1	0		0	0	4.70994	Male	Private residence/accommodation	G47B	Sunday	N	0	0	1	0	1	1	G47	Costing 2014-2015	Dandenong	2300000	8600000	41908.9	41910.5	2	2835.52
3467998	38	2.95	5.75781	0	8	0	0	0	0	0	0	0	0	0	0	1	0		0	0	5.82512	Female	Private residence/accommodation	G70A	Saturday	N	0	0	1	1	1	1	G70	Costing 2014-2015	Dandenong	2100000	8600000	41904	41909.8	6	6383.82
3473355	68	2.95	2.37109	1	8	0	0	0	0	0	0	0	0	0	0	1	0		0	0	2.22434	Male	Private residence/accommodation	G61B	Thursday	N	0	0	1	0	1	1	G61	Costing 2014-2015	Dandenong	4100000	8600000	41912.1	41914.4	2	3519.6
3464175	64	2.95	0.546875	1	8	0	0	0	0	0	0	0	0	0	0	1	0		0	0	0.217453	Female	Left against Medical Advice	X60B	Tuesday	N	0	0	1	0	1	1	X60	Costing 2014-2015	Dandenong	2400000	8600000	41898.1	41898.6	1	802.776
3473468	84	2.95	6.19531	0	8	0	0	0	0	0	0	0	0	0	0	1	0		0	0	6.20833	Male	Private residence/accommodation	J08A	Monday	Y	0	0	1	1	1	1	J08	Costing 2014-2015	Dandenong	7100000	8600000	41912.3	41918.5	6	10076.1
3458463	30	2.95	1.88672	1	8	0	0	0	0	0	0	0	0	0	0	1	0		0	0	1.37875	Male	Private residence/accommodation	J64B	Tuesday	N	0	0	1	0	1	1	J64	Costing 2014-2015	Dandenong	4100000	8600000	41889.6	41891.5	2	3525.25
3469270	47	2.95	2.84375	0	8	0	0	0	0	0	0	0	0	0	0	1	0		0	0	3.44523	Male	Private residence/accommodation	C60B	Friday	N	0	0	1	0	1	1	C60	Costing 2014-2015	Dandenong	2100000	8600000	41905.6	41908.5	3	3249.68
3472663	36	2.95	0.492188	0	8	0	0	0	0	0	0	0	0	0	0	1	0		0	0	0.5	Female	Private residence/accommodation	Y62C	Monday	N	0	0	1	0	1	1	Y62	Costing 2014-2015	Dandenong	2400000	8600000	41911	41911.5	1	517.988
3459228	76	2.95	4.72266	0	8	0	0	0	0	0	0	0	0	1	0	1	0		0	0	5.73811	Male	Private residence/accommodation	G65A	Saturday	N	0	0	1	1	1	1	G65	Costing 2014-2015	Dandenong	2000000	8600000	41890.7	41895.5	5	6432.6
3456143	41	3.74	42.2031	1	8	0	0	0	0	0	0	0	0	0	0	1	0		32.0965	46219	10.1118	Male	Private residence/accommodation	T01A	Wednesday	Y	0	0	1	1	1	1	T01	Costing 2014-2015	Dandenong	7300000	8600000	41885.5	41927.7	42	31711.2
3462838	73	2.95	8.75391	0	8	0	0	1	0	0	0	0	1	0	0	1	0		0	0	11.7205	Female	Private residence/accommodation	X07A	Monday	N	1	0	1	1	1	1	X07	Costing 2014-2015	Dandenong	2500000	8600000	41895.7	41904.5	9	9788.78
3464077	86	2.95	1.16406	0	8	0	0	0	0	0	0	0	0	0	0	1	0		0	0	1.16667	Male	Private residence/accommodation	J08A	Wednesday	N	0	0	1	1	1	1	J08	Costing 2014-2015	Dandenong	449874	8600000	41898.3	41899.5	1	4439.45
3460959	76	2.95	5.21094	0	8	0	0	0	0	0	0	0	0	0	0	1	0		0	0	5.25	Male	Private residence/accommodation	J08B	Tuesday	N	0	0	1	0	1	1	J08	Costing 2014-2015	Dandenong	4500000	8600000	41893.3	41898.5	5	6187.33
3456100	54	3.74	1.13672	1	8	0	0	0	0	0	0	0	0	0	0	1	0		0	0	1.125	Female	Private residence/accommodation	D62A	Thursday	N	0	0	1	1	1	1	D62	Costing 2014-2015	Dandenong	2400000	8600000	41885.4	41886.5	1	1356.18
3464666	44	2.95	5.13281	1	8	0	0	0	0	0	0	0	0	1	0	1	0		0	0	5.125	Male	Private residence/accommodation	X07A	Sunday	N	0	0	1	1	1	1	X07	Costing 2014-2015	Dandenong	2200000	8600000	41898.4	41903.5	5	6287.13
3468013	36	2.95	1.67188	0	8	0	0	0	0	0	0	0	0	0	0	1	0		0	0	2.06357	Female	Private residence/accommodation	E75B	Tuesday	N	0	0	1	0	1	1	E75	Costing 2014-2015	Dandenong	4200000	8600000	41903.9	41905.6	2	1831.97
3473807	21	2.95	1.83594	1	8	0	0	0	0	0	0	0	0	0	0	1	0		0	0	1.83333	Male	Private residence/accommodation	J68B	Thursday	N	0	0	1	0	1	1	J68	Costing 2014-2015	Dandenong	2500000	8600000	41912.6	41914.4	2	2528.44
3461971	43	2.95	3.03906	0	8	0	0	0	0	0	0	0	0	0	0	1	0		0	0	3.04167	Female	Private residence/accommodation	N04B	Monday	N	0	0	1	0	1	1	N04	Costing 2014-2015	Dandenong	7800000	8600000	41894.4	41897.5	3	7848.49
3461080	49	2.95	4.66797	1	8	0	0	0	0	0	0	0	0	0	0	1	0		0	0	4.66667	Female	Other acute hosp/ext care/rehab/geri ctr	X06A	Monday	Y	0	0	1	1	1	1	X06	Costing 2014-2015	Dandenong	324714	8600000	41893	41897.6	5	6109.55
3472521	83	2.95	3.41406	0	8	0	0	0	0	0	0	0	0	0	0	1	0		0	0	9.18009	Male	Other acute hosp/ext care/rehab/geri ctr	X63A	Wednesday	Y	0	0	1	1	1	1	X63	Costing 2014-2015	Dandenong	7000000	8600000	41910.3	41913.7	3	3332.46
3472539	79	2.95	2.98438	0	8	0	0	0	0	0	0	0	0	0	0	1	0		0	0	3	Male	Private residence/accommodation	D04Z	Wednesday	N	0	0	1	0	1	1	D04	Costing 2014-2015	Dandenong	2100000	8600000	41910.5	41913.5	3	6111.13
3471928	65	2.95	3.32422	1	8	0	0	0	0	0	0	0	0	0	0	1	0		0	0	2.00274	Female	Private residence/accommodation	G70B	Tuesday	N	0	0	1	0	1	1	G70	Costing 2014-2015	Dandenong	2200000	8600000	41909.4	41912.7	3	4955.28
3471807	41	2.95	1.90625	1	8	0	0	0	0	0	0	0	0	0	0	1	0		0	0	1.39595	Male	Private residence/accommodation	I30Z	Sunday	N	0	0	1	0	1	1	I30	Costing 2014-2015	Dandenong	811926	8600000	41908.9	41910.8	2	5147.04
3464236	43	2.95	5.21875	1	8	0	0	0	0	0	0	0	0	0	0	1	0		0	0	3.357	Male	Private residence/accommodation	G65A	Sunday	N	0	0	1	1	1	1	G65	Costing 2014-2015	Dandenong	7900000	8600000	41898.2	41903.5	5	7157.99
3468778	26	2.95	1.69922	0	8	0	0	0	0	0	0	0	0	0	0	1	0		0	0	3.04224	Female	Private residence/accommodation	H08B	Wednesday	N	0	0	1	0	1	1	H08	Costing 2014-2015	Dandenong	7900000	8600000	41904.9	41906.6	2	7726.54
3467173	50	2.95	0.917969	0	8	0	0	0	0	0	0	0	0	0	0	1	0		0	0	1.82852	Male	Private residence/accommodation	J64B	Saturday	N	0	0	1	0	1	1	J64	Costing 2014-2015	Dandenong	7100000	8600000	41901.7	41902.6	1	1108.27
3472375	32	2.95	0.40625	0	8	0	0	0	0	0	0	0	0	0	0	1	0		0	0	0.416667	Female	Private residence/accommodation	X04B	Sunday	N	0	0	1	0	1	1	X04	Costing 2014-2015	Dandenong	7900000	8600000	41910.4	41910.9	1	2435.7
3467132	25	2.95	1.92969	1	8	0	0	0	0	0	0	0	0	0	0	1	0		0	0	1.91667	Female	Private residence/accommodation	N07A	Sunday	N	0	0	1	1	1	1	N07	Costing 2014-2015	Dandenong	476052	8600000	41901.5	41903.4	2	6121.88
3466527	32	2.95	2.35547	0	8	0	0	0	0	0	0	0	0	0	0	1	0		0	0	3.04224	Female	Private residence/accommodation	H08B	Sunday	N	0	0	1	0	1	1	H08	Costing 2014-2015	Dandenong	4500000	8600000	41901.1	41903.5	2	6469.46
3466390	46	2.95	0.039063	0	8	0	0	0	0	0	0	0	0	0	0	1	0		0	0	0.270816	Female	Private residence/accommodation	X60B	Thursday	N	0	0	1	0	1	1	X60	Costing 2014-2015	Dandenong	4400000	8600000	41900.7	41900.8	1	240.634
3465889	51	2.95	2.17969	0	8	0	0	0	0	0	0	0	0	0	0	1	0		0	0	3.87923	Male	Private residence/accommodation	T61B	Saturday	N	0	0	1	0	1	1	T61	Costing 2014-2015	Dandenong	2000000	8600000	41900.4	41902.6	2	2861.26
3463879	64	2.95	1.86719	0	8	0	0	0	0	0	0	0	0	0	0	1	0		0	0	2.0062	Female	Private residence/accommodation	J11Z	Wednesday	N	0	0	1	0	1	1	J11	Costing 2014-2015	Dandenong	2000000	8600000	41897.8	41899.7	2	2755.74
3473028	34	2.95	0.203125	1	8	0	0	0	0	0	0	0	0	0	0	1	0		0	0	0.166667	Male	Private residence/accommodation	X05A	Monday	N	0	0	1	1	1	1	X05	Costing 2014-2015	Dandenong	7900000	8600000	41911.6	41911.8	1	1519.49
3474979	33	2.95	6.125	0	8	0	0	0	0	0	0	0	0	0	0	1	0		0	0	6.125	Female	Private residence/accommodation	J14Z	Wednesday	Y	0	0	1	0	1	1	J14	Costing 2014-2015	Dandenong	4700000	8600000	41914.3	41920.4	6	19110.9
3469076	53	2.95	4.01563	1	8	0	0	0	0	0	0	0	0	0	0	1	0		0	0	4	Female	Private residence/accommodation	J06A	Saturday	N	0	0	1	1	1	1	J06	Costing 2014-2015	Dandenong	7900000	8600000	41905.5	41909.5	4	8240.12
3468061	41	2.95	1.26563	1	8	0	0	0	0	0	0	0	0	1	0	1	0		0	0	1.25	Female	Private residence/accommodation	G66A	Tuesday	N	0	0	1	1	1	1	G66	Costing 2014-2015	Dandenong	4700000	8600000	41904.2	41905.5	1	1497.71
3467611	20	2.95	3.44141	1	8	0	0	0	0	0	0	0	0	0	0	1	0		0	0	3.41667	Male	Statistical Separation	J08A	Wednesday	Y	0	0	1	1	1	1	J08	Costing 2014-2015	Dandenong	4100000	8600000	41903.1	41906.5	3	5538.98
3476075	72	2.72	14.1328	0	8	0	0	0	1	0	0	0	1	0	0	1	0		0	0	14.1667	Male	Private residence/accommodation	A06C	Friday	Y	1	0	1	0	1	1	A06	Costing 2014-2015	Dandenong	7800000	8600000	41915.6	41929.8	14	38624.2
3461839	73	2.95	13.3203	1	8	1	0	0	1	0	0	1	2	0	0	1	0		0	0	13.2917	Female	Death	A06A	Thursday	Y	1	0	1	1	1	1	A06	Costing 2014-2015	Dandenong	7800000	8600000	41894.3	41907.6	13	86200.5
3464401	25	2.95	1.00781	1	8	0	0	0	0	0	0	0	0	0	0	1	0		0	0	1	Male	Private residence/accommodation	I17A	Wednesday	N	0	0	1	1	1	1	I17	Costing 2014-2015	Dandenong	2400000	8600000	41898.5	41899.5	1	6452.88
3464106	66	2.95	2.42969	0	8	0	0	0	0	0	0	0	0	0	0	1	0		0	0	2.45833	Male	Private residence/accommodation	J08A	Thursday	N	0	0	1	1	1	1	J08	Costing 2014-2015	Dandenong	7100000	8600000	41898.3	41900.7	2	12115.2
3456532	61	3.74	2.07031	0	8	0	0	0	1	0	0	0	1	1	0	1	0		0	0	2.08333	Male	Private residence/accommodation	H63A	Saturday	Y	1	0	1	1	1	1	H63	Costing 2014-2015	Dandenong	4100000	8600000	41886.5	41888.6	2	2655.02
3461149	32	2.95	5.07813	0	8	0	0	0	0	0	0	0	0	0	0	1	0		0	0	5.08333	Male	Private residence/accommodation	Y02C	Tuesday	N	0	0	1	0	1	1	Y02	Costing 2014-2015	Dandenong	2200000	8600000	41893.4	41898.4	5	7974
3469060	32	2.95	5.15625	1	8	0	0	0	0	0	0	0	0	0	0	1	0		0	0	2.51457	Male	Private residence/accommodation	X02A	Sunday	N	0	0	1	1	1	1	X02	Costing 2014-2015	Dandenong	7300000	8600000	41905.5	41910.6	5	26357.2
3455416	74	3.74	9.5	0	8	0	0	0	0	0	0	0	0	0	0	1	0		0	0	9.5	Female	Other acute hosp/ext care/rehab/geri ctr	D14A	Friday	Y	0	0	1	1	1	1	D14	Costing 2014-2015	Dandenong	4300000	8500000	41885.1	41894.6	9	17223.3
3459279	76	2.95	1.08594	1	8	0	0	0	0	0	0	0	0	0	0	1	0		0	0	1.08333	Male	Private residence/accommodation	J08B	Tuesday	N	0	0	1	0	1	1	J08	Costing 2014-2015	Dandenong	2200000	8600000	41890.4	41891.5	1	2646.65
3474762	54	2.95	1.96094	1	8	0	0	0	0	0	0	0	0	0	0	1	0		0	0	1.95833	Female	Private residence/accommodation	D05Z	Friday	N	0	0	1	0	1	1	D05	Costing 2014-2015	Dandenong	7800000	8600000	41913.5	41915.4	2	8673.95
3473356	20	2.95	0.476563	0	8	0	0	0	0	0	0	0	0	0	0	1	0		0	0	0.5	Female	Private residence/accommodation	Y62C	Tuesday	N	0	0	1	0	1	1	Y62	Costing 2014-2015	Dandenong	7900000	8600000	41912.1	41912.5	1	513.877
3453866	57	3.74	1.45313	0	8	0	0	0	0	0	0	0	0	0	0	1	0		0	0	1.45833	Female	Private residence/accommodation	H02B	Tuesday	N	0	0	1	0	1	1	H02	Costing 2014-2015	Dandenong	2400000	8500000	41883.3	41884.8	1	4722.38
3458538	57	2.95	51.0195	1	8	0	0	0	0	0	0	0	0	0	0	1	0		33.9299	48859	17.1118	Female	Private residence/accommodation	I02A	Tuesday	Y	0	0	1	1	1	1	I02	Costing 2014-2015	Dandenong	7900000	8600000	41889.7	41940.7	51	45052.4
3464211	78	2.95	14.2734	1	8	0	0	0	0	0	0	0	0	0	0	1	0		0	0	11.9032	Female	Other acute hosp/ext care/rehab/geri ctr	I08A	Tuesday	Y	0	0	1	1	1	1	I08	Costing 2014-2015	Dandenong	4500000	8600000	41898.1	41912.4	14	15011.1
3467741	61	2.95	3.21875	1	8	0	0	0	0	0	0	0	0	0	0	1	0		0	0	2.12689	Female	Private residence/accommodation	G70B	Wednesday	Y	0	0	1	0	1	1	G70	Costing 2014-2015	Dandenong	2100000	8600000	41903.1	41906.4	3	5189.67
3470946	88	2.95	4.21875	1	8	0	0	0	0	0	0	1	1	0	0	1	0		0	0	4.20833	Female	Other acute hosp/ext care/rehab/geri ctr	D04Z	Monday	Y	1	0	1	0	1	1	D04	Costing 2014-2015	Dandenong	7900000	8600000	41907.5	41911.7	4	22212.5
3461547	90	2.95	5.81641	0	8	0	0	0	0	0	0	0	0	1	0	1	0		0	0	12.722	Female	Private residence/accommodation	X07A	Wednesday	Y	0	0	1	1	1	1	X07	Costing 2014-2015	Dandenong	331538	8600000	41893.8	41899.6	6	8456.86
3459187	29	2.95	1.95703	0	8	0	0	0	0	0	0	0	0	0	0	1	0		0	0	1.95833	Male	Private residence/accommodation	L64B	Wednesday	N	0	0	1	0	1	1	L64	Costing 2014-2015	Dandenong	7000000	8600000	41890.7	41892.6	2	3502.19
3471449	45	2.95	2.06641	1	8	0	0	0	0	0	0	0	0	0	0	1	0		0	0	1.54364	Female	Private residence/accommodation	J64B	Sunday	N	0	0	1	0	1	1	J64	Costing 2014-2015	Dandenong	7900000	8600000	41908.6	41910.7	2	3221.17
3459380	62	2.95	14.4023	1	8	0	0	0	0	0	0	0	0	0	0	1	0		8.02292	11553	6.39375	Female	Private residence/accommodation	J06A	Tuesday	N	0	0	1	1	1	1	J06	Costing 2014-2015	Dandenong	220111	8600000	41891.3	41905.7	14	20135.6
3474527	90	2.95	15.1641	1	8	0	0	0	0	0	0	1	1	0	0	1	0		0	0	14.1407	Female	Aged care residential facility	X06A	Thursday	Y	1	0	1	1	1	1	X06	Costing 2014-2015	Dandenong	331538	8600000	41913.6	41928.7	15	25929.1
3470997	73	2.95	1.14063	0	8	0	0	0	0	0	0	0	0	1	0	1	0		0	0	1.16667	Female	Private residence/accommodation	J11Z	Saturday	N	0	0	1	0	1	1	J11	Costing 2014-2015	Dandenong	2300000	8600000	41908.3	41909.5	1	3001.92
3473985	68	2.95	11.0703	0	8	0	0	0	0	0	0	0	0	0	0	1	0		2.73056	3932	7.17639	Female	Private residence/accommodation	J12A	Saturday	Y	0	0	1	1	1	1	J12	Costing 2014-2015	Dandenong	2100000	8600000	41912.5	41923.5	11	14912.9
3463190	82	2.95	1.08203	0	8	0	0	0	0	0	0	0	0	0	0	1	0		0	0	1.77899	Male	Private residence/accommodation	X05B	Monday	N	0	0	1	0	1	1	X05	Costing 2014-2015	Dandenong	7600000	8600000	41896.7	41897.8	1	2083.65
3467738	24	2.95	1.58984	1	8	0	0	0	0	0	0	0	0	0	0	1	0		0	0	1.37049	Female	Private residence/accommodation	I30Z	Monday	N	0	0	1	0	1	1	I30	Costing 2014-2015	Dandenong	4300000	8600000	41902.9	41904.5	2	3279.47
3460448	67	2.95	2.10547	1	8	0	0	0	0	0	0	0	0	0	0	1	0		0	0	2.08333	Female	Other acute hosp/ext care/rehab/geri ctr	J13B	Friday	Y	0	0	1	0	1	1	J13	Costing 2014-2015	Dandenong	845315	8600000	41892.5	41894.6	2	4893.43
3472730	77	2.95	1.32031	0	8	0	0	0	0	0	0	0	0	0	0	1	0		0	0	1.33333	Male	Private residence/accommodation	J08A	Tuesday	N	0	0	1	1	1	1	J08	Costing 2014-2015	Dandenong	2300000	8600000	41911.3	41912.6	1	4230.44
3459340	39	2.95	39.0664	1	8	0	0	0	0	0	0	0	0	0	0	1	0		9.34792	13461	5.60881	Male	Private residence/accommodation	J08A	Friday	Y	0	0	1	1	1	1	J08	Costing 2014-2015	Dandenong	7900000	8600000	41890.6	41929.7	34	46325.4
3468125	85	2.95	1.33203	0	8	0	0	0	0	0	0	0	0	0	0	1	0		0	0	1.33333	Male	Private residence/accommodation	J08B	Tuesday	N	0	0	1	0	1	1	J08	Costing 2014-2015	Dandenong	7900000	8600000	41904.3	41905.6	1	5077.29
3472823	36	2.95	24.0469	1	8	0	0	0	0	0	0	0	0	0	0	1	0		0	0	7.5347	Female	Other acute hosp/ext care/rehab/geri ctr	O01A	Thursday	Y	0	0	1	1	1	1	O01	Costing 2014-2015	Dandenong	7100000	8600000	41911.4	41935.4	24	59058.5
3455514	84	3.74	21.3555	0	8	0	0	0	0	0	0	0	0	0	0	1	0		0	0	21.375	Female	Private residence/accommodation	A06A	Wednesday	Y	0	0	1	1	1	1	A06	Costing 2014-2015	Dandenong	2400000	8500000	41885.3	41906.6	21	49701.8
3466265	83	2.95	4.76953	0	8	0	0	0	0	0	0	0	0	1	0	1	0		0	0	9.54615	Female	Aged care residential facility	E65A	Tuesday	Y	0	0	1	1	1	1	E65	Costing 2014-2015	Dandenong	2000000	8600000	41900.8	41905.5	5	4406.91
3468840	45	2.95	1.14453	1	8	0	0	0	0	0	0	0	0	0	0	1	0		0	0	1.125	Male	Private residence/accommodation	D04Z	Wednesday	N	0	0	1	0	1	1	D04	Costing 2014-2015	Dandenong	7900000	8600000	41905.3	41906.4	1	7755.51
3473462	57	2.95	7.21094	1	8	0	0	0	0	0	0	0	0	0	0	1	0		0	0	7.20833	Female	Private residence/accommodation	B07A	Tuesday	N	0	0	1	1	1	1	B07	Costing 2014-2015	Dandenong	2400000	8600000	41912.3	41919.5	7	18830.6
3457011	70	3.74	26.5547	1	8	0	0	0	0	0	0	0	0	0	0	1	0		0	0	4.71011	Female	Private residence/accommodation	G48B	Wednesday	N	0	0	1	0	1	1	G48	Costing 2014-2015	Dandenong	2300000	8600000	41887	41913.6	26	28655.5
3468455	41	2.95	0.929688	0	8	0	0	0	0	0	0	0	0	0	0	1	0		0	0	3.49681	Female	Private residence/accommodation	N61Z	Tuesday	N	0	0	1	0	1	1	N61	Costing 2014-2015	Dandenong	4100000	8600000	41904.6	41905.5	1	1462.47
3454027	90	3.74	7.23438	0	8	0	0	0	0	0	0	0	0	0	0	1	0		0	0	7.25	Female	Aged care residential facility	J13B	Monday	N	0	0	1	0	1	1	J13	Costing 2014-2015	Dandenong	3000000	8500000	41883.3	41890.6	7	8491.47
3464759	62	2.95	20.9102	1	8	0	0	0	0	0	0	0	0	0	0	1	0		0	0	20.875	Female	Private residence/accommodation	A06A	Tuesday	Y	0	0	1	1	1	1	A06	Costing 2014-2015	Dandenong	4400000	8600000	41898.5	41919.4	21	69664.2
3464880	17	2.95	1.71875	0	8	0	0	0	1	0	0	0	1	1	0	1	0		0	0	2.50197	Female	Private residence/accommodation	X60A	Thursday	N	1	0	1	1	1	1	X60	Costing 2014-2015	Dandenong	4000000	8600000	41898.9	41900.6	2	3895.68
3474071	60	2.95	2.17969	0	8	0	0	0	0	0	0	0	0	0	0	1	0		0	0	2.20833	Female	Private residence/accommodation	N04B	Friday	N	0	0	1	0	1	1	N04	Costing 2014-2015	Dandenong	2400000	8600000	41913.3	41915.5	2	7417.18
3468017	47	2.95	3.64844	0	8	0	0	0	0	0	0	0	0	0	0	1	0		0	0	13.9845	Female	Private residence/accommodation	801A	Thursday	Y	0	0	1	1	1	1	801	Costing 2014-2015	Dandenong	2400000	8600000	41904	41907.6	4	5806.07
3457749	63	3.74	2.91406	0	8	0	0	0	0	0	0	0	0	0	0	1	0		0	0	2.91667	Male	Other acute hosp/ext care/rehab/geri ctr	J08A	Monday	Y	0	0	1	1	1	1	J08	Costing 2014-2015	Dandenong	3000000	8600000	41887.7	41890.6	3	4607.51
3454005	52	3.74	2.36719	0	8	0	0	0	0	0	0	0	0	0	0	1	0		0	0	2.375	Female	Private residence/accommodation	N04B	Wednesday	N	0	0	1	0	1	1	N04	Costing 2014-2015	Dandenong	7600000	8500000	41883.3	41885.7	2	5364.18
3474414	38	2.95	0.746094	0	8	0	0	0	0	0	0	0	0	1	0	1	0		0	0	0.75	Male	Private residence/accommodation	C62A	Thursday	N	0	0	1	1	1	1	C62	Costing 2014-2015	Dandenong	7900000	8600000	41913.5	41914.3	1	1342.65
3465553	32	2.95	1.99219	1	8	0	0	0	0	0	0	0	0	0	0	1	0		0	0	1.96222	Male	Private residence/accommodation	J64B	Friday	N	0	0	1	0	1	1	J64	Costing 2014-2015	Dandenong	4200000	8600000	41899.5	41901.5	2	2692.24
3464298	82	2.95	0.488281	1	8	0	0	0	0	0	0	0	0	0	0	1	0		0	0	0.458333	Male	Aged care residential facility	J08C	Tuesday	N	0	0	1	0	1	1	J08	Costing 2014-2015	Dandenong	4500000	8600000	41898.4	41898.9	1	2400.03
3454635	33	3.74	0.441406	0	8	0	0	0	0	0	0	0	0	0	0	1	0		0	0	1.42867	Male	Private residence/accommodation	X63B	Tuesday	N	0	0	1	0	1	1	X63	Costing 2014-2015	Dandenong	7200000	8500000	41884	41884.4	1	678.869
3464518	41	2.95	2.88281	0	8	0	0	0	0	0	0	0	0	0	0	1	0		0	0	2.91667	Male	Private residence/accommodation	C11Z	Friday	N	0	0	1	0	1	1	C11	Costing 2014-2015	Dandenong	4400000	8600000	41898.6	41901.5	3	4875.77
3471729	83	2.95	21.8594	0	8	0	0	1	0	0	0	0	1	0	0	1	0		0	0	21.875	Female	Other acute hosp/ext care/rehab/geri ctr	I02A	Saturday	Y	1	0	1	1	1	1	I02	Costing 2014-2015	Dandenong	7100000	8600000	41908.7	41930.5	22	31247.1
3472729	79	2.95	7.49609	1	8	0	0	0	0	0	0	0	0	0	0	1	0		0	0	7.45833	Male	Private residence/accommodation	D02A	Monday	N	0	0	1	1	1	1	D02	Costing 2014-2015	Dandenong	7100000	8600000	41911.3	41918.8	7	35851.7
3461858	66	2.95	5.23828	0	8	0	0	0	0	0	0	0	0	0	0	1	0		0	0	5.25	Male	Private residence/accommodation	J13B	Wednesday	N	0	0	1	0	1	1	J13	Costing 2014-2015	Dandenong	854046	8600000	41894.3	41899.6	5	5577.01
3473488	53	2.95	1.22266	0	8	0	0	0	0	0	0	0	0	0	0	1	0		0	0	1.25	Male	Private residence/accommodation	B02C	Wednesday	N	0	0	1	0	1	1	B02	Costing 2014-2015	Dandenong	2300000	8600000	41912.3	41913.5	1	9085.51
3466536	65	2.95	1.36719	0	8	0	0	0	0	0	0	0	0	0	0	1	0		0	0	3.33332	Male	Private residence/accommodation	H62B	Saturday	N	0	0	1	0	1	1	H62	Costing 2014-2015	Dandenong	1000000	8600000	41901.2	41902.6	1	2611.15
3454875	32	3.74	6.01563	1	8	0	0	0	0	0	0	0	0	0	0	1	0		0	0	4.12222	Female	Private residence/accommodation	H08A	Monday	N	0	0	1	1	1	1	H08	Costing 2014-2015	Dandenong	4600000	8500000	41884.4	41890.4	6	11352.5
3459781	53	2.95	2.94531	0	8	0	0	0	0	0	0	0	0	0	0	1	0		0	0	2.95833	Female	Private residence/accommodation	D14B	Friday	N	0	0	1	0	1	1	D14	Costing 2014-2015	Dandenong	1000000	8600000	41891.5	41894.5	3	5169.58
3470313	23	2.95	2.40234	1	8	0	0	0	0	0	0	0	0	0	0	1	0		0	0	2.28305	Male	Private residence/accommodation	G47B	Saturday	N	0	0	1	0	1	1	G47	Costing 2014-2015	Dandenong	7900000	8600000	41907	41909.4	2	3324.4
3470252	82	2.95	1.14844	1	8	0	0	0	0	0	0	0	0	0	0	1	0		0	0	1.125	Male	Private residence/accommodation	J08A	Friday	Y	0	0	1	1	1	1	J08	Costing 2014-2015	Dandenong	2400000	8600000	41907.3	41908.4	1	5418.78
3466483	23	2.95	1.41016	1	8	0	0	0	0	0	0	0	0	0	0	1	0		0	0	1.37875	Female	Private residence/accommodation	J64B	Saturday	N	0	0	1	0	1	1	J64	Costing 2014-2015	Dandenong	4400000	8600000	41901	41902.4	1	2685.07
3476239	94	2.72	6.19141	1	8	0	0	0	0	0	0	0	0	0	0	1	0		0	0	6.16667	Female	Private residence/accommodation	X07A	Thursday	Y	0	0	1	1	1	1	X07	Costing 2014-2015	Dandenong	4500000	8600000	41915.4	41921.6	6	7502.01
3454558	41	3.74	2.72266	1	8	0	0	0	0	0	0	0	0	0	0	1	0		0	0	1.72649	Female	Private residence/accommodation	L67B	Thursday	N	0	0	1	0	1	1	L67	Costing 2014-2015	Dandenong	4600000	8500000	41883.6	41886.4	3	3901.99
3465163	71	2.95	1.36328	0	8	0	0	0	1	0	0	0	1	0	0	1	0		0	0	4.03443	Female	Private residence/accommodation	K64A	Thursday	N	1	0	1	1	1	1	K64	Costing 2014-2015	Dandenong	825822	8600000	41899.4	41900.8	1	1662.57
3457283	43	3.74	1.96094	1	8	0	0	0	0	0	0	0	0	0	0	1	0		0	0	1.95833	Female	Private residence/accommodation	N07A	Sunday	N	0	0	1	1	1	1	N07	Costing 2014-2015	Dandenong	7800000	8600000	41887.5	41889.4	2	4947.22
3454641	21	3.74	3.58203	1	8	0	0	0	0	0	0	0	0	0	0	1	0		0	0	2.87462	Female	Private residence/accommodation	N61Z	Friday	N	0	0	1	0	1	1	N61	Costing 2014-2015	Dandenong	4300000	8500000	41884.1	41887.6	3	5381.54
3473524	75	2.95	2.21094	1	8	0	0	0	0	0	0	0	0	0	0	1	0		0	0	2.20833	Female	Private residence/accommodation	X06B	Thursday	N	0	0	1	0	1	1	X06	Costing 2014-2015	Dandenong	4100000	8600000	41912.3	41914.5	2	5893.83
3472554	33	2.95	1.94531	1	8	0	0	0	0	0	0	0	0	1	0	1	0		0	0	1.44494	Female	Private residence/accommodation	O03B	Tuesday	N	0	0	1	0	1	1	O03	Costing 2014-2015	Dandenong	7700000	8600000	41910.7	41912.7	2	5469.85
3467435	21	2.95	1.20313	0	8	0	0	0	0	0	0	0	0	0	0	1	0		0	0	1.77177	Male	Private residence/accommodation	G07B	Sunday	N	0	0	1	0	1	1	G07	Costing 2014-2015	Dandenong	7900000	8600000	41902.2	41903.4	1	5693.69
3458742	28	2.95	0.621094	0	8	0	0	0	0	0	0	0	0	0	0	1	0		0	0	0.625	Female	Private residence/accommodation	G66A	Monday	N	0	0	1	1	1	1	G66	Costing 2014-2015	Dandenong	7700000	8600000	41889.9	41890.5	1	1245.88
3460838	32	2.95	1.01172	1	8	0	0	0	0	0	0	0	0	0	0	1	0		0	0	1	Female	Private residence/accommodation	J06B	Thursday	N	0	0	1	0	1	1	J06	Costing 2014-2015	Dandenong	7700000	8600000	41892.4	41893.4	1	4625.1
3472474	45	2.95	2.83203	0	8	0	0	0	0	0	0	0	0	0	0	1	0		0	0	3.12541	Female	Private residence/accommodation	H08B	Wednesday	N	0	0	1	0	1	1	H08	Costing 2014-2015	Dandenong	700061	8600000	41910.7	41913.5	3	7937.96
3458276	21	2.95	1.78125	0	8	0	0	0	0	0	0	0	0	0	0	1	0		0	0	2.51457	Male	Private residence/accommodation	X02A	Monday	N	0	0	1	1	1	1	X02	Costing 2014-2015	Dandenong	7600000	8600000	41889.1	41890.8	1	4171.77
3465220	50	2.95	3.25	0	8	0	0	0	0	0	0	0	0	0	0	1	0		0	0	3.25	Female	Private residence/accommodation	N04B	Saturday	Y	0	0	1	0	1	1	N04	Costing 2014-2015	Dandenong	4400000	8600000	41899.4	41902.7	3	8556.93
3467571	21	2.95	2.82031	1	8	0	0	0	0	0	0	0	0	0	0	1	0		0	0	1.284	Female	Private residence/accommodation	L63B	Tuesday	N	0	0	1	0	1	1	L63	Costing 2014-2015	Dandenong	2400000	8600000	41902.6	41905.4	3	4380.04
3465398	39	2.95	1.58203	0	8	0	0	0	0	0	0	0	0	0	0	1	0		0	0	1.58333	Female	Private residence/accommodation	F69B	Friday	N	0	0	1	0	1	1	F69	Costing 2014-2015	Dandenong	2500000	8600000	41899.8	41901.4	2	2056.31
3472255	25	2.95	2.42188	0	8	0	0	0	0	0	0	0	0	0	0	1	0		0	0	2.45833	Male	Private residence/accommodation	D04Z	Tuesday	Y	0	0	1	0	1	1	D04	Costing 2014-2015	Dandenong	1000000	8600000	41910	41912.4	3	9695.84
3461094	20	2.95	0.242188	0	8	0	0	0	0	0	0	0	0	0	0	1	0		0	0	0.253666	Female	Private residence/accommodation	C11Z	Thursday	N	0	0	1	0	1	1	C11	Costing 2014-2015	Dandenong	7900000	8600000	41893.3	41893.6	1	1704.8
3475705	65	2.72	3.25	0	8	0	0	0	0	0	0	0	0	0	0	1	0		0	0	3.25	Female	Private residence/accommodation	J13B	Monday	N	0	0	1	0	1	1	J13	Costing 2014-2015	Dandenong	160983	8600000	41915.3	41918.6	3	5753.07
3460256	83	2.95	22.3789	1	8	0	0	0	0	0	0	0	0	0	0	1	0		0	0	8.78999	Female	Aged care residential facility	L63A	Thursday	Y	0	0	1	1	1	1	L63	Costing 2014-2015	Dandenong	7800000	8600000	41892.2	41914.6	22	22872.8
3468413	27	2.95	1.02344	0	8	0	0	0	0	0	0	0	0	0	0	1	0		0	0	1.04167	Male	Left against Medical Advice	D14B	Tuesday	N	0	0	1	0	1	1	D14	Costing 2014-2015	Dandenong	7800000	8600000	41904.6	41905.6	1	3991.43
3465038	52	2.95	0.035156	1	8	0	0	0	0	0	0	0	0	0	0	1	0		0	0	0	Male	Private residence/accommodation	J68C	Wednesday	N	0	0	1	0	1	1	J68	Costing 2014-2015	Dandenong	7600000	8600000	41899.3	41899.4	1	196.329
3469704	46	2.95	5.26563	0	8	0	0	0	0	0	0	0	0	0	0	1	0		0	0	8.14157	Female	Private residence/accommodation	H60A	Monday	N	0	0	1	1	1	1	H60	Costing 2014-2015	Dandenong	4400000	8600000	41906.4	41911.7	5	5548.33
3459562	68	2.95	6.13672	1	8	0	0	0	0	0	0	0	0	0	0	1	0		0	0	6.125	Female	Private residence/accommodation	J14Z	Monday	Y	0	0	1	0	1	1	J14	Costing 2014-2015	Dandenong	4400000	8600000	41891.3	41897.5	6	12209.3
3466178	69	2.95	0.167969	0	8	0	0	0	0	0	0	0	0	0	0	1	0		0	0	0.208333	Male	Private residence/accommodation	X06B	Thursday	N	0	0	1	0	1	1	X06	Costing 2014-2015	Dandenong	4100000	8600000	41900.7	41900.8	1	1103.07
3490699	48	2.72	1.92578	0	9	0	0	0	0	0	0	0	0	0	0	1	0		0	0	6.92804	Male	Private residence/accommodation	X06A	Monday	N	0	0	1	1	1	1	X06	Costing 2014-2015	Dandenong	2400000	8600000	41937.6	41939.5	2	3150.69
3484806	56	2.72	0.964844	0	9	0	0	0	0	0	0	0	0	0	0	1	0		0	0	2.50821	Male	Left against Medical Advice	E75B	Friday	N	0	0	1	0	1	1	E75	Costing 2014-2015	Dandenong	4200000	8600000	41928.7	41929.6	1	1349.05
3480949	48	2.72	3.81641	1	9	0	0	0	0	0	0	0	0	0	0	1	0		0	0	1.56421	Female	Private residence/accommodation	D66B	Saturday	N	0	0	1	0	1	1	D66	Costing 2014-2015	Dandenong	7900000	8600000	41919.7	41923.6	4	4017.9
3477723	44	2.72	5.67188	1	9	0	0	0	0	0	0	0	0	0	0	1	0		0	0	5.37155	Male	Private residence/accommodation	X07B	Saturday	N	0	0	1	0	1	1	X07	Costing 2014-2015	Dandenong	7100000	8600000	41918	41923.6	6	9903.98
3485068	83	2.72	7.26953	1	9	0	0	0	0	0	0	0	0	0	0	1	0		0	0	7.25	Female	Other acute hosp/ext care/rehab/geri ctr	J13A	Friday	Y	0	0	1	1	1	1	J13	Costing 2014-2015	Dandenong	4100000	8600000	41929.3	41936.6	7	9588.9
3478845	42	2.72	4.09766	0	9	0	0	0	0	0	0	0	0	0	0	1	0		0	0	4.125	Female	Private residence/accommodation	N04A	Sunday	Y	0	0	1	1	1	1	N04	Costing 2014-2015	Dandenong	4100000	8600000	41920.4	41924.5	4	9059.66
3490462	70	2.72	0.695313	0	9	0	0	0	0	0	0	0	0	0	0	1	0		0	0	3.05011	Male	Private residence/accommodation	T61B	Saturday	N	0	0	1	0	1	1	T61	Costing 2014-2015	Dandenong	1000000	8600000	41936.9	41937.6	1	842.123
3493753	81	2.72	1.16016	0	9	0	0	0	0	0	0	0	0	0	0	1	0		0	0	1.16667	Male	Private residence/accommodation	C11Z	Friday	Y	0	0	1	0	1	1	C11	Costing 2014-2015	Dandenong	7700000	8600000	41942.3	41943.5	1	4177.28
3488468	78	2.72	6.27344	1	9	0	0	0	0	0	0	0	0	0	0	1	0		0	0	6.25	Male	Private residence/accommodation	D02A	Tuesday	Y	0	0	1	1	1	1	D02	Costing 2014-2015	Dandenong	4300000	8600000	41934.5	41940.7	6	32028.6
3481087	37	2.72	2.51953	1	9	0	0	0	0	0	0	0	0	0	0	1	0		0	0	1.80228	Female	Private residence/accommodation	G70B	Monday	N	0	0	1	0	1	1	G70	Costing 2014-2015	Dandenong	1000000	8600000	41923.1	41925.6	2	3307.5
3483411	35	2.72	2.92578	1	9	0	0	0	0	0	0	0	0	0	0	1	0		0	0	2.91667	Male	Private residence/accommodation	X05A	Friday	N	0	0	1	1	1	1	X05	Costing 2014-2015	Dandenong	7900000	8600000	41926.7	41929.6	3	7904.51
3481847	60	2.72	5.12891	0	9	0	0	0	0	0	0	0	0	0	0	1	0		0	0	5.16667	Male	Private residence/accommodation	D02A	Saturday	N	0	0	1	1	1	1	D02	Costing 2014-2015	Dandenong	716134	8600000	41925.5	41930.6	5	10931.6
3486182	30	2.72	1.62891	1	9	0	0	0	0	0	0	0	0	0	0	1	0		0	0	1.47875	Male	Private residence/accommodation	X06B	Sunday	N	0	0	1	0	1	1	X06	Costing 2014-2015	Dandenong	7900000	8600000	41929.9	41931.5	2	2837.59
3493060	49	2.72	0.964844	1	9	0	0	0	0	0	0	0	0	0	0	1	0		0	0	0.958333	Male	Private residence/accommodation	D14A	Thursday	N	0	0	1	1	1	1	D14	Costing 2014-2015	Dandenong	2100000	8600000	41941.4	41942.4	1	5316.37
3481452	77	2.72	3.86719	0	9	0	0	0	0	0	0	0	0	0	0	1	0		0	0	3.875	Male	Private residence/accommodation	M62A	Wednesday	Y	0	0	1	1	1	1	M62	Costing 2014-2015	Dandenong	2400000	8600000	41923.8	41927.7	4	4538.44
3484967	52	2.72	1.19141	0	9	0	0	0	0	0	0	0	0	0	0	1	0		0	0	1.25212	Female	Private residence/accommodation	N62Z	Friday	N	0	0	1	0	1	1	N62	Costing 2014-2015	Dandenong	2500000	8600000	41928.6	41929.8	1	3992.05
3481848	85	2.72	5.33984	0	9	0	0	0	0	0	0	0	0	0	0	1	0		0	0	5.375	Male	Private residence/accommodation	D02A	Saturday	Y	0	0	1	1	1	1	D02	Costing 2014-2015	Dandenong	417496	8600000	41925.3	41930.6	5	17239.9
3489189	47	2.72	1.44531	0	9	0	0	0	0	0	0	0	0	0	0	1	0		0	0	1.45833	Female	Private residence/accommodation	N04B	Friday	N	0	0	1	0	1	1	N04	Costing 2014-2015	Dandenong	4500000	8600000	41935.3	41936.7	1	6472.37
3482751	19	2.72	2.51563	1	9	0	0	0	0	0	0	0	0	0	0	1	0		0	0	2.5	Female	Private residence/accommodation	G66A	Thursday	N	0	0	1	1	1	1	G66	Costing 2014-2015	Dandenong	7300000	8600000	41926.3	41928.8	2	4577.17
3477922	78	2.72	7.29297	1	9	0	0	0	0	0	0	0	0	1	0	1	0		0	0	7.29167	Male	Private residence/accommodation	J08A	Monday	Y	0	0	1	1	1	1	J08	Costing 2014-2015	Dandenong	4300000	8600000	41918.3	41925.6	7	27952.7
3490446	36	2.72	0.867188	0	9	0	0	0	0	0	0	0	0	0	0	1	0		0	0	1.15121	Male	Private residence/accommodation	D67A	Saturday	N	0	0	1	1	1	1	D67	Costing 2014-2015	Dandenong	7200000	8600000	41936.7	41937.6	1	1021.25
3483258	59	2.72	1.15234	0	9	0	0	0	0	0	0	0	0	0	0	1	0		0	0	1.16667	Male	Private residence/accommodation	D40Z	Wednesday	N	0	0	1	0	1	1	D40	Costing 2014-2015	Dandenong	4400000	8600000	41926.3	41927.5	1	3277.05
3486385	33	2.72	3.69531	1	9	0	0	0	1	0	0	0	1	0	0	1	0		0	0	3.4405	Female	Private residence/accommodation	N08Z	Wednesday	N	1	0	1	0	1	1	N08	Costing 2014-2015	Dandenong	7800000	8600000	41930.9	41934.6	4	7019.8
3480027	44	2.72	4.33984	1	9	0	0	0	0	0	0	0	0	0	0	1	0		0	0	4.33333	Female	Private residence/accommodation	N04A	Monday	N	0	0	1	1	1	1	N04	Costing 2014-2015	Dandenong	4500000	8600000	41921.5	41925.8	4	10191.7
3490417	37	2.72	3.11328	1	9	0	0	0	0	0	0	0	0	1	0	1	0		0	0	3.08333	Female	Private residence/accommodation	J68A	Monday	N	0	0	1	1	1	1	J68	Costing 2014-2015	Dandenong	4200000	8600000	41936.5	41939.6	3	5204.07
3492846	71	2.72	0.390625	0	9	0	0	0	0	0	0	0	0	0	0	1	0		0	0	2.78863	Female	Private residence/accommodation	X02A	Wednesday	N	0	0	1	1	1	1	X02	Costing 2014-2015	Dandenong	7900000	8600000	41941	41941.3	1	4466.03
3489471	45	2.72	1.89844	1	9	0	0	0	0	0	0	0	0	0	0	1	0		0	0	1.65153	Female	Private residence/accommodation	O03B	Saturday	N	0	0	1	0	1	1	O03	Costing 2014-2015	Dandenong	7900000	8600000	41935.7	41937.6	2	4381.94
3487511	44	2.72	6.54297	1	9	0	0	0	0	0	0	0	0	0	0	1	0		0	0	1.80228	Male	Private residence/accommodation	G70B	Monday	N	0	0	1	0	1	1	G70	Costing 2014-2015	Dandenong	2400000	8600000	41932.9	41939.4	7	8103.67
3490661	46	2.72	5.10156	1	9	0	0	0	0	0	0	0	0	0	0	1	0		0	0	5.08333	Female	Private residence/accommodation	J08B	Thursday	N	0	0	1	0	1	1	J08	Costing 2014-2015	Dandenong	377341	8600000	41937.5	41942.6	5	6713.45
3485106	19	2.72	10.4688	0	9	0	0	0	0	0	0	0	0	0	0	1	0		0	0	12.98	Female	Private residence/accommodation	G02A	Monday	Y	0	0	1	1	1	1	G02	Costing 2014-2015	Dandenong	883296	8600000	41929	41939.5	10	15678.5
3478847	81	2.72	5.00391	1	9	0	0	0	0	0	0	0	0	0	0	1	0		0	0	5	Male	Private residence/accommodation	D02A	Monday	N	0	0	1	1	1	1	D02	Costing 2014-2015	Dandenong	2500000	8600000	41920.4	41925.5	5	13176.6
3483498	83	2.72	3.65234	1	9	0	0	0	0	0	0	0	0	0	0	1	0		0	0	3.03241	Male	Private residence/accommodation	G11Z	Saturday	Y	0	0	1	0	1	1	G11	Costing 2014-2015	Dandenong	7900000	8600000	41927.1	41930.8	3	7461.95
3481445	54	2.72	1.12891	0	9	0	0	0	0	0	0	0	0	0	0	1	0		0	0	3.17565	Female	Private residence/accommodation	X05A	Sunday	N	0	0	1	1	1	1	X05	Costing 2014-2015	Dandenong	206809	8600000	41923.7	41924.9	1	2274.65
3484158	88	2.72	14.1992	0	9	0	0	0	0	0	0	0	0	0	0	1	0		0	0	20.2602	Female	Transition Care bed based program	J12A	Wednesday	Y	0	0	1	1	1	1	J12	Costing 2014-2015	Dandenong	4400000	8600000	41927.5	41941.7	14	15917.9
3482963	26	2.72	1.98828	0	9	0	0	0	0	0	0	0	0	0	0	1	0		0	0	2	Male	Private residence/accommodation	B07B	Thursday	N	0	0	1	0	1	1	B07	Costing 2014-2015	Dandenong	813189	8600000	41926.4	41928.4	2	8248.69
3477228	45	2.72	4.28516	0	9	0	0	0	0	0	0	0	0	0	0	1	0		0	0	4.29167	Male	Private residence/accommodation	J12B	Friday	N	0	0	1	0	1	1	J12	Costing 2014-2015	Dandenong	7800000	8600000	41918.3	41922.6	4	7472.14
3484861	89	2.72	1.11328	0	9	0	0	0	0	0	0	0	0	0	0	1	0		0	0	1.125	Male	Private residence/accommodation	J10Z	Friday	N	0	0	1	0	1	1	J10	Costing 2014-2015	Dandenong	7800000	8600000	41928.3	41929.4	1	2733.59
3487468	36	2.72	9.71094	1	9	0	0	0	0	0	0	0	0	0	0	1	0		0	0	9.70833	Male	Left against Medical Advice	X06B	Thursday	N	0	0	1	0	1	1	X06	Costing 2014-2015	Dandenong	2400000	8600000	41933.1	41942.8	9	12152
3485048	44	2.72	2.26953	1	9	0	0	0	0	0	0	0	0	0	0	1	0		0	0	2.25	Female	Private residence/accommodation	N04B	Sunday	N	0	0	1	0	1	1	N04	Costing 2014-2015	Dandenong	4500000	8600000	41929.3	41931.6	2	5970.69
3485363	46	2.72	3.25	0	9	0	0	0	0	0	0	0	0	1	0	1	0		0	0	3.25	Female	Private residence/accommodation	N04A	Monday	N	0	0	1	1	1	1	N04	Costing 2014-2015	Dandenong	4300000	8600000	41929.4	41932.7	3	8296.37
3489057	37	2.72	8.44531	0	9	0	0	0	0	0	0	0	0	0	0	1	0		3.94931	5687	4.46736	Female	Private residence/accommodation	J14Z	Friday	Y	0	0	1	0	1	1	J14	Costing 2014-2015	Dandenong	7800000	8600000	41935.3	41943.7	8	17650.6
3485584	44	2.72	0.882813	0	9	0	0	0	0	0	0	0	0	0	0	1	0		0	0	1.79625	Male	Private residence/accommodation	X06B	Saturday	N	0	0	1	0	1	1	X06	Costing 2014-2015	Dandenong	2200000	8600000	41929.7	41930.5	1	1946.26
3489706	58	2.72	3.5625	1	9	0	0	0	0	0	0	0	0	0	0	1	0		0	0	3.54167	Female	Private residence/accommodation	X06A	Monday	N	0	0	1	1	1	1	X06	Costing 2014-2015	Dandenong	7900000	8600000	41935.9	41939.5	4	4961.23
3481696	72	2.72	2.54297	0	9	0	0	0	0	0	0	0	0	0	0	1	0		0	0	5.34965	Female	Private residence/accommodation	T62A	Wednesday	N	0	0	1	1	1	1	T62	Costing 2014-2015	Dandenong	280001	8600000	41924.5	41927.1	3	7091.08
3486540	19	2.72	0.472656	0	9	0	0	0	0	0	0	0	0	0	0	1	0		0	0	1.42867	Male	Private residence/accommodation	X63B	Monday	N	0	0	1	0	1	1	X63	Costing 2014-2015	Dandenong	7900000	8600000	41931.9	41932.4	1	676.568
3481610	29	2.72	4.47656	1	9	0	0	0	1	0	0	0	1	0	0	1	0		0	0	2.96395	Female	Other acute hosp/ext care/rehab/geri ctr	T60B	Thursday	Y	1	0	1	0	1	1	T60	Costing 2014-2015	Dandenong	7900000	8600000	41923.9	41928.4	5	7134.89
3491252	93	2.72	1.05859	0	9	0	0	0	0	0	0	0	0	0	0	1	0		0	0	1.08333	Female	Private residence/accommodation	J08B	Tuesday	N	0	0	1	0	1	1	J08	Costing 2014-2015	Dandenong	2400000	8600000	41939.3	41940.3	1	4814.92
3494204	43	2.72	0.984375	0	9	0	0	0	0	0	0	0	0	0	0	1	0		0	0	1	Female	Private residence/accommodation	N10Z	Friday	N	0	0	1	0	1	1	N10	Costing 2014-2015	Dandenong	7400000	8600000	41942.3	41943.3	1	4001.3
3488987	21	2.72	1.30469	0	9	0	0	0	0	0	0	0	0	0	0	1	0		0	0	2.73432	Male	Private residence/accommodation	H62B	Friday	N	0	0	1	0	1	1	H62	Costing 2014-2015	Dandenong	4500000	8600000	41935.3	41936.6	1	1443.9
3481110	38	2.72	4.29688	1	9	0	0	0	0	0	0	0	0	0	0	1	0		0	0	3.01313	Female	Private residence/accommodation	O04A	Wednesday	N	0	0	1	1	1	1	O04	Costing 2014-2015	Dandenong	711351	8600000	41923.2	41927.5	4	9941.81
3486330	41	2.72	1.55469	0	9	0	0	0	0	0	0	0	0	0	0	1	0		0	0	1.58333	Male	Private residence/accommodation	D12B	Monday	N	0	0	1	0	1	1	D12	Costing 2014-2015	Dandenong	7900000	8600000	41931	41932.5	2	5029.02
3490258	29	2.72	2.67578	1	9	0	0	0	0	0	0	0	0	0	0	1	0		0	0	1.47875	Male	Private residence/accommodation	X06B	Monday	N	0	0	1	0	1	1	X06	Costing 2014-2015	Dandenong	4000000	8600000	41936.8	41939.5	3	3443.81
3485828	77	2.72	8.75	0	9	0	0	0	0	0	0	0	0	0	0	1	0		0.847917	1221	6.01042	Female	Private residence/accommodation	C02Z	Sunday	Y	0	0	1	0	1	1	C02	Costing 2014-2015	Dandenong	2000000	8600000	41929.8	41938.5	9	14095.8
3492902	42	2.72	2.12891	1	9	0	0	0	0	0	0	0	0	0	0	1	0		0	0	2.125	Female	Private residence/accommodation	N04B	Friday	N	0	0	1	0	1	1	N04	Costing 2014-2015	Dandenong	2100000	8600000	41941.3	41943.4	2	6732.03
3478282	20	2.72	1.21484	1	9	0	0	0	0	0	0	0	0	0	0	1	0		0	0	1.20833	Female	Private residence/accommodation	D04Z	Wednesday	N	0	0	1	0	1	1	D04	Costing 2014-2015	Dandenong	7800000	8600000	41919.5	41920.7	1	8855.86
3480653	53	2.72	17.9531	0	9	0	0	0	0	0	0	1	1	0	0	1	0		0	0	17.9583	Male	Private residence/accommodation	J64A	Tuesday	Y	1	0	1	1	1	1	J64	Costing 2014-2015	Dandenong	7800000	8600000	41922.5	41940.5	18	25211.9
3485117	61	2.72	5.54297	1	9	0	0	0	0	0	0	0	0	0	0	1	0		0	0	2.05307	Female	Private residence/accommodation	G47B	Wednesday	N	0	0	1	0	1	1	G47	Costing 2014-2015	Dandenong	2000000	8600000	41929.1	41934.6	5	9676.82
3493960	54	2.72	1.0625	0	9	0	0	0	0	0	0	0	0	1	0	1	0		0.009028	13	1.07431	Male	Private residence/accommodation	F13B	Friday	N	0	0	1	0	1	1	F13	Costing 2014-2015	Dandenong	2000000	8600000	41942.5	41943.5	1	3127.3
3482705	66	2.72	2.40625	0	9	0	0	0	0	0	0	0	0	0	0	1	0		0	0	2.92958	Male	Private residence/accommodation	F76A	Thursday	N	0	0	1	1	1	1	F76	Costing 2014-2015	Dandenong	7000000	8600000	41926.2	41928.6	2	2670.86
3478851	88	2.72	2.07031	0	9	0	0	0	0	0	0	0	0	0	0	1	0		0	0	2.08333	Female	Private residence/accommodation	D05Z	Friday	N	0	0	1	0	1	1	D05	Costing 2014-2015	Dandenong	205983	8600000	41920.5	41922.5	2	7621.81
3488048	42	2.72	8.375	0	9	0	0	0	0	0	0	0	0	0	0	1	0		0	0	8.375	Female	Private residence/accommodation	J01A	Wednesday	Y	0	0	1	1	1	1	J01	Costing 2014-2015	Dandenong	4600000	8600000	41933.4	41941.7	8	20637
3494022	55	2.72	0.941406	0	9	0	0	0	0	0	0	0	0	0	0	1	0		0	0	1.63016	Male	Private residence/accommodation	X02B	Friday	N	0	0	1	0	1	1	X02	Costing 2014-2015	Dandenong	7900000	8600000	41942.5	41943.5	1	4264.44
3491347	46	2.72	1.5625	0	9	0	0	0	0	0	0	0	0	0	0	1	0		0	0	6.41618	Female	Private residence/accommodation	X06A	Tuesday	N	0	0	1	1	1	1	X06	Costing 2014-2015	Dandenong	7300000	8600000	41939	41940.6	1	2562.21
3491173	66	2.72	5.08203	0	9	0	0	0	0	0	0	0	0	0	0	1	0		0	0	51.8273	Male	Other acute hosp/ext care/rehab/geri ctr	A06A	Friday	Y	0	0	1	1	1	1	A06	Costing 2014-2015	Dandenong	2400000	8600000	41938.8	41943.9	5	15658.7
3487484	28	2.72	1.18359	1	9	0	0	0	0	0	0	0	0	0	0	1	0		0	0	1.16667	Female	Private residence/accommodation	G66A	Wednesday	N	0	0	1	1	1	1	G66	Costing 2014-2015	Dandenong	2500000	8600000	41933.3	41934.5	1	2155.18
3489806	73	2.72	1.23047	0	9	0	0	0	0	0	0	0	0	0	0	1	0		0	0	1.25	Female	Private residence/accommodation	J13A	Saturday	N	0	0	1	1	1	1	J13	Costing 2014-2015	Dandenong	2300000	8600000	41936.3	41937.6	1	2235.91
3480155	40	2.72	12.8867	1	9	0	0	0	0	0	0	0	0	0	0	1	0		8.15556	11744	4.76111	Female	Private residence/accommodation	J62A	Wednesday	N	0	0	1	1	1	1	J62	Costing 2014-2015	Dandenong	7600000	8600000	41921.9	41934.8	13	8764.78
3486384	19	2.72	5.5625	0	9	0	0	0	0	0	0	0	0	0	0	1	0		0	0	5.58333	Male	Private residence/accommodation	J08A	Friday	N	0	0	1	1	1	1	J08	Costing 2014-2015	Dandenong	7900000	8600000	41930.9	41936.5	6	9173.21
3479618	39	2.72	13.4375	1	9	0	0	0	0	0	0	0	0	0	0	1	0		12.2708	17670	1.1875	Female	Private residence/accommodation	X63B	Wednesday	N	0	0	1	0	1	1	X63	Costing 2014-2015	Dandenong	2100000	8600000	41921.2	41934.7	13	7308.62
3487440	25	2.72	3.59375	1	9	0	0	0	0	0	0	0	0	0	0	1	0		0	0	2.85956	Female	Private residence/accommodation	X06A	Friday	N	0	0	1	1	1	1	X06	Costing 2014-2015	Dandenong	4200000	8600000	41933	41936.6	4	7856.28
3486425	85	2.72	11.75	0	9	0	0	0	0	0	0	1	1	0	0	1	0		0	0	11.75	Male	Other acute hosp/ext care/rehab/geri ctr	D02A	Friday	Y	1	0	1	1	1	1	D02	Costing 2014-2015	Dandenong	7900000	8600000	41931.7	41943.4	12	33690.2
3481097	74	2.72	4.37891	0	9	0	0	0	0	0	0	0	0	0	0	1	0		0	0	5.80037	Male	Private residence/accommodation	I13A	Wednesday	N	0	0	1	1	1	1	I13	Costing 2014-2015	Dandenong	7200000	8600000	41923.2	41927.5	4	14079
3485071	65	2.72	1.51563	1	9	0	0	0	0	0	0	0	0	0	0	1	0		0	0	1.5	Female	Private residence/accommodation	J08A	Saturday	N	0	0	1	1	1	1	J08	Costing 2014-2015	Dandenong	2200000	8600000	41929.3	41930.8	1	8965.85
3486407	29	2.72	1.21094	1	9	0	0	0	0	0	0	0	0	1	0	1	0		0	0	1.20833	Male	Private residence/accommodation	J11Z	Tuesday	Y	0	0	1	0	1	1	J11	Costing 2014-2015	Dandenong	4300000	8600000	41932.3	41933.5	1	3168.43
3485286	35	2.72	0.476563	0	9	0	0	0	0	0	0	0	0	0	0	1	0		0	0	0.5	Male	Private residence/accommodation	I30Z	Friday	N	0	0	1	0	1	1	I30	Costing 2014-2015	Dandenong	422750	8600000	41929.3	41929.8	1	2630.12
3491397	19	2.72	3.08984	1	9	0	0	0	0	0	0	0	0	1	0	1	0		0	0	1.47875	Female	Private residence/accommodation	X06B	Thursday	N	0	0	1	0	1	1	X06	Costing 2014-2015	Dandenong	4200000	8600000	41939.3	41942.4	3	5828.79
3480208	42	2.72	0.488281	1	9	0	0	0	0	0	0	0	0	0	0	1	0		0	0	0.458333	Male	Private residence/accommodation	I30Z	Friday	N	0	0	1	0	1	1	I30	Costing 2014-2015	Dandenong	2500000	8600000	41922.1	41922.6	1	2224.81
3492042	22	2.72	2.14063	1	9	0	0	0	0	0	0	0	0	0	0	1	0		0	0	2.125	Male	Private residence/accommodation	D04Z	Thursday	N	0	0	1	0	1	1	D04	Costing 2014-2015	Dandenong	2500000	8600000	41940.3	41942.4	2	13892.3
3477934	36	2.72	13.3906	1	9	0	0	0	0	0	0	0	0	0	0	1	0		10.9972	15836	2.37778	Female	Private residence/accommodation	J14Z	Monday	N	0	0	1	0	1	1	J14	Costing 2014-2015	Dandenong	4500000	8600000	41919.3	41932.7	13	18311.4
3479723	38	2.72	0.59375	1	9	0	0	0	0	0	0	0	0	1	0	1	0		0	0	0.244285	Female	Left against Medical Advice	N62Z	Wednesday	N	0	0	1	0	1	1	N62	Costing 2014-2015	Dandenong	711351	8600000	41920	41920.6	1	721.405
3489214	31	2.72	2.23438	0	9	0	0	0	0	0	0	0	0	0	0	1	0		0	0	2.25	Female	Private residence/accommodation	N08Z	Saturday	N	0	0	1	0	1	1	N08	Costing 2014-2015	Dandenong	7100000	8600000	41935.4	41937.7	2	7692.39
3476503	71	2.72	4.16016	0	9	0	0	0	0	0	0	0	0	0	0	1	0		0	0	4.16667	Female	Private residence/accommodation	X06A	Wednesday	N	0	0	1	1	1	1	X06	Costing 2014-2015	Dandenong	7500000	8600000	41916.4	41920.6	4	5520.9
3484511	63	2.72	2.76953	1	9	0	0	0	0	0	0	0	0	0	0	1	0		0	0	2.75	Female	Statistical Separation	T01A	Thursday	Y	0	0	1	1	1	1	T01	Costing 2014-2015	Dandenong	2400000	8600000	41925.6	41928.4	3	5357.25
3494037	24	2.72	0.296875	1	9	0	0	0	0	0	0	0	0	0	0	1	0		0	0	0.291667	Male	Private residence/accommodation	I27C	Thursday	N	0	0	1	0	1	1	I27	Costing 2014-2015	Dandenong	2500000	8600000	41942.6	41942.9	1	1664.67
3487427	29	2.72	1.85547	1	9	0	0	0	0	0	0	0	0	0	0	1	0		0	0	1.02119	Female	Private residence/accommodation	O05Z	Wednesday	N	0	0	1	0	1	1	O05	Costing 2014-2015	Dandenong	7500000	8600000	41932.9	41934.8	2	3689.23
3480314	35	2.72	7.02344	1	9	0	0	0	0	0	0	0	0	0	0	1	0		0	0	3.15597	Male	Private residence/accommodation	X02A	Friday	Y	0	0	1	1	1	1	X02	Costing 2014-2015	Dandenong	4300000	8600000	41922.4	41929.4	7	13191
3491349	29	2.72	2.21094	1	9	0	0	0	0	0	0	0	0	0	0	1	0		0	0	1.53565	Male	Private residence/accommodation	D11Z	Wednesday	N	0	0	1	0	1	1	D11	Costing 2014-2015	Dandenong	2400000	8600000	41939.1	41941.3	2	3185.36
3486383	41	2.72	2.55469	1	9	0	0	0	0	0	0	0	0	0	0	1	0		0	0	2.54167	Female	Left against Medical Advice	J64A	Tuesday	Y	0	0	1	1	1	1	J64	Costing 2014-2015	Dandenong	1000000	8600000	41930.9	41933.4	3	3729.13
3484042	29	2.72	1.04297	1	9	0	0	0	0	0	0	0	0	0	0	1	0		0	0	1.04167	Male	Private residence/accommodation	I30Z	Thursday	N	0	0	1	0	1	1	I30	Costing 2014-2015	Dandenong	7900000	8600000	41927.8	41928.9	1	2836.33
3480089	77	2.72	0.957031	0	9	0	0	0	0	0	0	0	0	0	0	1	0		0	0	2.10521	Male	Private residence/accommodation	X06B	Friday	Y	0	0	1	0	1	1	X06	Costing 2014-2015	Dandenong	7900000	8600000	41921.7	41922.7	1	3191.31
3486601	43	2.72	3.28125	0	9	0	0	0	0	0	0	0	0	0	0	1	0		0	0	6.99895	Female	Private residence/accommodation	F75A	Thursday	N	0	0	1	1	1	1	F75	Costing 2014-2015	Dandenong	4200000	8600000	41932.2	41935.5	3	4984.37
3518326	51	3.29	1.39844	0	10	0	0	0	0	0	0	0	0	0	0	0	1		0	0	1.41667	Male	Private residence/accommodation	X06B	Saturday	N	0	0	1	0	1	1	X06	Costing 2014-2015	Dandenong	4700000	8600000	41978.3	41979.7	1	3954.11
3516937	41	3.29	1.14453	0	10	0	0	0	0	0	0	0	0	0	0	0	1		0	0	1.16667	Female	Private residence/accommodation	Z01A	Thursday	N	0	0	1	1	1	1	Z01	Costing 2014-2015	Dandenong	839325	8600000	41976.4	41977.6	1	3139.18
3506482	26	3.29	2.91406	1	10	0	0	0	0	0	0	0	0	0	0	0	1		0	0	1.10731	Female	Private residence/accommodation	N09Z	Friday	N	0	0	1	0	1	1	N09	Costing 2014-2015	Dandenong	7300000	8600000	41961.6	41964.5	3	4449.62
3496700	72	3.29	5.54297	1	10	0	0	0	0	0	0	0	0	0	0	0	1		0	0	5.54167	Female	Private residence/accommodation	D14A	Sunday	N	0	0	1	1	1	1	D14	Costing 2014-2015	Dandenong	7900000	8600000	41947	41952.5	6	12488.4
3512340	50	3.29	1.63672	1	10	0	0	0	0	0	0	0	0	0	0	0	1		0	0	1.625	Male	Private residence/accommodation	D63B	Friday	N	0	0	1	0	1	1	D63	Costing 2014-2015	Dandenong	2300000	8600000	41969.8	41971.4	2	1694.95
3497378	66	3.29	4.16797	1	10	0	0	0	0	0	0	0	0	0	0	0	1		0	0	4.16667	Male	Private residence/accommodation	J08A	Sunday	N	0	0	1	1	1	1	J08	Costing 2014-2015	Dandenong	4100000	8600000	41948.4	41952.6	4	20589.4
3500919	18	3.29	1.86719	0	10	0	0	0	0	0	0	0	0	0	0	0	1		0	0	1.875	Male	Private residence/accommodation	D04Z	Wednesday	N	0	0	1	0	1	1	D04	Costing 2014-2015	Dandenong	4400000	8600000	41953.7	41955.6	2	8154.6
3513401	53	3.29	1.42578	0	10	0	0	0	0	0	0	0	0	0	0	0	1		0	0	1.45833	Male	Private residence/accommodation	B05Z	Saturday	N	0	0	1	0	1	1	B05	Costing 2014-2015	Dandenong	4500000	8600000	41971.1	41972.5	1	6113.16
3514982	27	3.29	1.57813	0	10	0	0	0	0	0	0	0	0	0	0	0	1		0	0	2.06439	Male	Private residence/accommodation	T61B	Tuesday	Y	0	0	1	0	1	1	T61	Costing 2014-2015	Dandenong	2300000	8600000	41973.9	41975.5	2	1887.23
3505703	52	3.29	3.11328	0	10	0	0	0	0	0	0	1	1	0	0	0	1		0	0	3.125	Male	Private residence/accommodation	D14A	Thursday	N	1	0	1	1	1	1	D14	Costing 2014-2015	Dandenong	7900000	8600000	41960.6	41963.7	3	9982.53
3496016	60	3.29	2.58984	1	10	0	0	0	0	0	0	0	0	0	0	0	1		0	0	1.65384	Male	Private residence/accommodation	D11Z	Wednesday	N	0	0	1	0	1	1	D11	Costing 2014-2015	Dandenong	410193	8600000	41946.3	41948.9	2	2553.21
3517589	35	3.29	18.1914	1	10	0	0	0	0	0	0	0	0	0	0	0	1		0	0	18.1667	Male	Private residence/accommodation	I02A	Monday	Y	0	0	1	1	1	1	I02	Costing 2014-2015	Dandenong	7900000	8600000	41977.3	41995.5	18	44665.4
3509879	63	3.29	0.460938	1	10	0	0	0	0	0	0	0	0	0	0	0	1		0	0	0.458333	Male	Private residence/accommodation	I30Z	Saturday	N	0	0	1	0	1	1	I30	Costing 2014-2015	Dandenong	2200000	8600000	41965.5	41965.9	1	3650.8
3513034	22	3.29	1.01953	0	10	0	0	0	0	0	0	0	0	1	0	0	1		0	0	1.4853	Female	Private residence/accommodation	L67B	Friday	N	0	0	1	0	1	1	L67	Costing 2014-2015	Dandenong	4700000	8600000	41970.7	41971.7	1	2005.02
3502767	40	3.29	1.65234	1	10	0	0	0	0	0	0	0	0	0	0	0	1		0	0	1.33574	Female	Private residence/accommodation	X05B	Friday	N	0	0	1	0	1	1	X05	Costing 2014-2015	Dandenong	7900000	8600000	41955.8	41957.4	2	3683.72
3511348	57	3.29	1.84375	0	10	0	0	0	0	0	0	0	0	0	0	0	1		0	0	6.03014	Female	Private residence/accommodation	I79B	Thursday	N	0	0	1	0	1	1	I79	Costing 2014-2015	Dandenong	239052	8600000	41968.8	41970.6	2	2590.32
3500234	25	3.29	0.488281	0	10	0	0	0	0	0	0	0	0	0	0	0	1		0	0	0.5	Male	Private residence/accommodation	I30Z	Sunday	N	0	0	1	0	1	1	I30	Costing 2014-2015	Dandenong	7900000	8600000	41952.5	41953	1	1630.41
3514492	24	3.29	0.632813	1	10	0	0	0	0	0	0	0	0	0	0	0	1		0	0	0.298032	Male	Private residence/accommodation	X06B	Sunday	N	0	0	1	0	1	1	X06	Costing 2014-2015	Dandenong	7900000	8600000	41973.3	41973.9	1	3549.62
3497385	85	3.29	7.38672	0	10	0	0	0	2	0	0	0	2	0	0	0	1		0	0	10.7153	Male	Other acute hosp/ext care/rehab/geri ctr	I69A	Wednesday	Y	1	0	1	1	1	1	I69	Costing 2014-2015	Dandenong	2300000	8600000	41948.4	41955.8	7	9021.08
3502291	48	3.29	3.15234	0	10	0	0	0	0	0	0	0	0	0	0	0	1		0	0	3.16667	Female	Private residence/accommodation	N04B	Saturday	Y	0	0	1	0	1	1	N04	Costing 2014-2015	Dandenong	7900000	8600000	41955.5	41958.6	3	7752.28
3506357	57	3.29	52.1602	0	10	0	0	0	0	0	0	0	0	0	0	0	1		0.007639	11	29.1875	Female	Private residence/accommodation	T01A	Friday	Y	0	0	1	1	1	1	T01	Costing 2014-2015	Dandenong	187464	8600000	41961.5	42013.6	52	45649
3497153	30	3.29	1.6875	1	10	0	0	0	0	0	0	0	0	0	0	0	1		0	0	1.376	Male	Private residence/accommodation	X06B	Thursday	N	0	0	1	0	1	1	X06	Costing 2014-2015	Dandenong	824670	8600000	41948	41949.7	1	2677.78
3515127	81	3.29	5.57813	0	10	0	0	0	0	0	0	0	0	0	0	0	1		0	0	10.994	Female	Aged care residential facility	T60A	Saturday	Y	0	0	1	1	1	1	T60	Costing 2014-2015	Dandenong	7100000	8600000	41974.1	41979.7	5	6837.17
3506605	33	3.29	0.332031	0	10	0	0	0	0	0	0	0	0	0	0	0	1		0	0	0.333333	Female	Private residence/accommodation	G66B	Tuesday	N	0	0	1	0	1	1	G66	Costing 2014-2015	Dandenong	7800000	8600000	41961.3	41961.6	1	655.832
3515735	80	3.29	8.55078	1	10	0	0	0	0	0	0	0	0	0	0	0	1		0	0	7.43432	Female	Aged care residential facility	G65A	Wednesday	Y	0	0	1	1	1	1	G65	Costing 2014-2015	Dandenong	414405	8600000	41975	41983.6	8	10111.4
3501014	44	3.29	0.75	0	10	0	0	0	0	0	0	0	0	0	0	0	1		0	0	1.61403	Male	Private residence/accommodation	X06B	Tuesday	Y	0	0	1	0	1	1	X06	Costing 2014-2015	Dandenong	2000000	8600000	41953.9	41954.7	1	2694.94
3502247	52	3.29	3.56641	0	10	0	0	0	0	0	0	0	0	1	0	0	1		0	0	3.58333	Male	Private residence/accommodation	D05Z	Sunday	N	0	0	1	0	1	1	D05	Costing 2014-2015	Dandenong	872799	8600000	41955.5	41959	4	10433.1
3500416	70	3.29	2.19922	0	10	0	0	0	0	0	0	0	0	0	0	0	1		0	0	2.20833	Female	Private residence/accommodation	N06Z	Wednesday	N	0	0	1	0	1	1	N06	Costing 2014-2015	Dandenong	897583	8600000	41953.3	41955.5	2	4466.42
3497207	75	3.29	1.84766	1	10	0	0	0	0	0	0	0	0	0	0	0	1		0	0	1.83333	Male	Private residence/accommodation	X02B	Thursday	N	0	0	1	0	1	1	X02	Costing 2014-2015	Dandenong	2300000	8600000	41947.8	41949.7	2	3783.67
3517590	37	3.29	39	1	10	0	0	0	0	0	0	0	0	0	0	0	1		15.1938	21879	4.64722	Female	Private residence/accommodation	J08A	Monday	N	0	0	1	1	1	1	J08	Costing 2014-2015	Dandenong	4200000	8600000	41977.3	42016.3	22	23481.7
3515986	20	3.29	0.375	1	10	0	0	0	0	0	0	0	0	0	0	0	1		0	0	0.300405	Female	Private residence/accommodation	O05Z	Tuesday	N	0	0	1	0	1	1	O05	Costing 2014-2015	Dandenong	4600000	8600000	41975.4	41975.7	1	1686.87
3503201	52	3.29	1.07813	0	10	0	0	0	0	0	0	0	0	0	0	0	1		0	0	1.08333	Male	Private residence/accommodation	J67A	Friday	N	0	0	1	1	1	1	J67	Costing 2014-2015	Dandenong	2400000	8600000	41956.6	41957.7	1	1221.79
3509816	21	3.29	1.26172	0	10	0	0	0	0	0	0	0	0	0	0	0	1		0	0	1.29167	Male	Private residence/accommodation	D12B	Monday	N	0	0	1	0	1	1	D12	Costing 2014-2015	Dandenong	7900000	8600000	41966.2	41967.4	1	4101.43
3499660	24	3.29	2.34375	1	10	0	0	0	0	0	0	0	0	0	0	0	1		0	0	1.42867	Female	Private residence/accommodation	X63B	Monday	N	0	0	1	0	1	1	X63	Costing 2014-2015	Dandenong	2400000	8600000	41951.1	41953.4	2	2328.71
3505243	65	3.29	2.23047	0	10	0	0	0	0	0	0	0	0	0	0	0	1		0	0	2.49639	Female	Private residence/accommodation	G47B	Wednesday	Y	0	0	1	0	1	1	G47	Costing 2014-2015	Dandenong	2200000	8600000	41960.2	41962.5	2	2296.22
3506852	68	3.29	7.22266	0	10	0	0	0	1	0	0	0	1	0	0	0	1		0	0	7.90236	Male	Other acute hosp/ext care/rehab/geri ctr	G70A	Wednesday	N	1	0	1	1	1	1	G70	Costing 2014-2015	Dandenong	7300000	8600000	41962.2	41969.4	7	9005.14
3517570	39	3.29	1.24609	0	10	0	0	0	0	0	0	0	0	0	0	0	1		0	0	3.12541	Female	Private residence/accommodation	H08B	Friday	N	0	0	1	0	1	1	H08	Costing 2014-2015	Dandenong	4200000	8600000	41977.3	41978.5	1	5333.59
3498729	57	3.29	8.60156	0	10	0	0	0	1	0	0	1	2	0	0	0	1		0	0	9.42428	Female	Statistical Separation	B67A	Saturday	Y	1	0	1	1	1	1	B67	Costing 2014-2015	Dandenong	2100000	8600000	41950	41958.6	9	14005.4
3505066	23	3.29	1.08984	0	10	0	0	0	0	0	0	0	0	0	0	0	1		0	0	1.41541	Male	Private residence/accommodation	B07B	Monday	N	0	0	1	0	1	1	B07	Costing 2014-2015	Dandenong	789203	8600000	41959.8	41960.9	1	5290.3
3506128	46	3.29	1.20313	0	10	0	0	0	0	0	0	0	0	0	0	0	1		0	0	1.20833	Male	Private residence/accommodation	D04Z	Wednesday	N	0	0	1	0	1	1	D04	Costing 2014-2015	Dandenong	2200000	8600000	41961.3	41962.5	1	10169.3
3501331	83	3.29	6.39063	1	10	0	0	1	0	0	0	0	1	0	0	0	1		0	0	6.375	Male	Private residence/accommodation	J08A	Monday	Y	1	0	1	1	1	1	J08	Costing 2014-2015	Dandenong	2300000	8600000	41954.3	41960.7	6	15294.8
3516938	55	3.29	5.03906	0	10	0	0	0	0	0	0	0	0	0	0	0	1		0	0	5.04167	Male	Private residence/accommodation	R02A	Monday	Y	0	0	1	1	1	1	R02	Costing 2014-2015	Dandenong	2000000	8600000	41976.5	41981.5	5	16491.5
3511951	48	3.29	3.15625	0	10	0	0	0	0	0	0	0	0	0	0	0	1		0	0	3.16667	Female	Private residence/accommodation	N04B	Saturday	N	0	0	1	0	1	1	N04	Costing 2014-2015	Dandenong	7200000	8600000	41969.4	41972.6	3	6388.35
3515919	44	3.29	3.125	0	10	0	0	0	0	0	0	0	0	0	0	0	1		0	0	3.125	Male	Private residence/accommodation	D63A	Friday	Y	0	0	1	1	1	1	D63	Costing 2014-2015	Dandenong	2400000	8600000	41975.3	41978.4	3	4807.63
3515886	88	3.29	1.23828	0	10	0	0	0	0	0	0	0	0	0	0	0	1		0	0	1.25	Male	Private residence/accommodation	D12B	Wednesday	Y	0	0	1	0	1	1	D12	Costing 2014-2015	Dandenong	4100000	8600000	41975.2	41976.4	1	4040.18
3497393	40	3.29	12.0898	1	10	0	0	0	1	0	0	0	1	1	0	0	1		0	0	12.0833	Female	Private residence/accommodation	N04A	Monday	Y	1	0	1	1	1	1	N04	Costing 2014-2015	Dandenong	2400000	8600000	41948.5	41960.5	12	23975.6
3510387	52	3.29	1.01953	0	10	0	0	0	0	0	0	0	0	0	0	0	1		0	0	1.8746	Male	Private residence/accommodation	X63B	Tuesday	N	0	0	1	0	1	1	X63	Costing 2014-2015	Dandenong	872799	8600000	41967.5	41968.5	1	1201.02
3518048	33	3.29	0.839844	0	10	0	0	0	0	0	0	0	0	0	0	0	1		0	0	2.85956	Male	Private residence/accommodation	X06A	Friday	N	0	0	1	1	1	1	X06	Costing 2014-2015	Dandenong	2400000	8600000	41977.8	41978.7	1	1780.22
3498565	38	3.29	4.0625	1	10	0	0	0	0	0	0	0	0	0	0	0	1		0	0	4.04167	Male	Left against Medical Advice	J64B	Monday	N	0	0	1	0	1	1	J64	Costing 2014-2015	Dandenong	4400000	8600000	41949.3	41953.4	4	5653.61
3502974	45	3.29	4.32813	0	10	0	0	0	0	0	0	0	0	1	0	0	1		0	0	4.33333	Female	Private residence/accommodation	N04A	Monday	Y	0	0	1	1	1	1	N04	Costing 2014-2015	Dandenong	4000000	8600000	41956.4	41960.8	4	8424.88
3500145	53	3.29	3.17188	1	10	0	0	0	0	0	0	0	0	0	0	0	1		0	0	3.16667	Female	Private residence/accommodation	D62A	Wednesday	N	0	0	1	1	1	1	D62	Costing 2014-2015	Dandenong	4700000	8600000	41952.2	41955.4	3	3284
3517722	40	3.29	4.11328	0	10	0	0	0	0	0	0	0	0	0	0	0	1		0	0	4.125	Female	Private residence/accommodation	N04A	Monday	N	0	0	1	1	1	1	N04	Costing 2014-2015	Dandenong	4500000	8600000	41977.5	41981.6	4	10584
3510405	56	3.29	1.04297	1	10	0	0	0	0	0	0	0	0	0	0	0	1		0	0	1.04167	Female	Private residence/accommodation	I30Z	Tuesday	N	0	0	1	0	1	1	I30	Costing 2014-2015	Dandenong	7800000	8600000	41967.5	41968.5	1	5157.77
3509214	45	3.29	0.964844	1	10	0	0	0	0	0	0	0	0	0	0	0	1		0	0	0.958333	Male	Private residence/accommodation	I17A	Saturday	N	0	0	1	1	1	1	I17	Costing 2014-2015	Dandenong	82819	8600000	41964.4	41965.4	1	4197.73
3507630	81	3.29	2.12109	1	10	0	0	0	0	0	0	0	0	0	0	0	1		0	0	2.08333	Male	Private residence/accommodation	J08B	Saturday	Y	0	0	1	0	1	1	J08	Costing 2014-2015	Dandenong	2200000	8600000	41963.3	41965.4	2	7218.59
3505036	49	3.29	1.85547	1	10	0	0	0	1	0	0	0	1	0	0	0	1		0	0	1.84253	Female	Private residence/accommodation	N10Z	Tuesday	N	1	0	1	0	1	1	N10	Costing 2014-2015	Dandenong	808461	8600000	41959.7	41961.5	2	3679.97
3505869	72	3.29	1.58984	0	10	0	0	0	0	0	0	0	0	0	0	0	1		0	0	2.18192	Female	Private residence/accommodation	B81B	Wednesday	Y	0	0	1	0	1	1	B81	Costing 2014-2015	Dandenong	2200000	8600000	41960.9	41962.5	2	2343.99
3497427	33	3.29	1.12109	0	10	0	0	0	0	0	0	0	0	0	0	0	1		0	0	1.15319	Male	Private residence/accommodation	X05B	Thursday	N	0	0	1	0	1	1	X05	Costing 2014-2015	Dandenong	7300000	8600000	41948.5	41949.6	1	1790.38
3515128	19	3.29	0.6875	1	10	0	0	0	0	0	0	0	0	0	0	0	1		0	0	0.666667	Male	Left against Medical Advice	G66B	Monday	N	0	0	1	0	1	1	G66	Costing 2014-2015	Dandenong	1000000	8600000	41974.1	41974.8	1	940.255
3505077	68	3.29	2.64453	0	10	0	0	0	0	0	0	0	0	0	0	0	1		0	0	8.10039	Male	Private residence/accommodation	X63A	Wednesday	N	0	0	1	1	1	1	X63	Costing 2014-2015	Dandenong	2100000	8600000	41959.8	41962.5	3	8633.86
3504912	33	3.29	0.625	1	10	0	0	0	0	0	0	0	0	0	0	0	1		0	0	0.320177	Female	Private residence/accommodation	N09Z	Sunday	N	0	0	1	0	1	1	N09	Costing 2014-2015	Dandenong	4300000	8600000	41959.2	41959.8	1	1595.65
3511908	78	3.29	2.25391	0	10	0	0	0	0	0	0	0	0	0	0	0	1		0	0	2.29167	Male	Private residence/accommodation	R04A	Friday	Y	0	0	1	1	1	1	R04	Costing 2014-2015	Dandenong	4300000	8600000	41969.4	41971.7	2	10180.9
3495593	37	3.29	1.01953	0	10	0	0	0	0	0	0	0	0	0	0	0	1		0	0	1.61403	Male	Private residence/accommodation	X06B	Sunday	N	0	0	1	0	1	1	X06	Costing 2014-2015	Dandenong	7900000	8600000	41944.8	41945.8	1	2003.41
3501404	85	3.29	3.15625	0	10	0	0	0	0	0	0	0	0	0	0	0	1		0	0	3.16667	Male	Private residence/accommodation	J64B	Friday	Y	0	0	1	0	1	1	J64	Costing 2014-2015	Dandenong	883572	8600000	41954.3	41957.5	3	3332.61
3502587	78	3.29	64.7891	0	10	0	0	0	2	0	0	2	4	0	0	0	1		0	0	64.7917	Female	Statistical Separation	A06A	Friday	Y	1	0	1	1	1	1	A06	Costing 2014-2015	Dandenong	7000000	8600000	41955.8	42020.6	65	166460
3512289	52	3.29	4.63672	1	10	0	0	0	0	0	0	0	0	0	0	0	1		0	0	1.54716	Male	Left against Medical Advice	I30Z	Monday	Y	0	0	1	0	1	1	I30	Costing 2014-2015	Dandenong	7900000	8600000	41969.8	41974.4	5	6803.18
3518046	25	3.29	1.67578	1	10	0	0	0	0	0	0	0	0	1	0	0	1		0	0	1.66667	Female	Private residence/accommodation	D63A	Saturday	N	0	0	1	1	1	1	D63	Costing 2014-2015	Dandenong	4600000	8600000	41977.8	41979.5	2	1763.7
3499053	54	3.29	3.02734	0	10	0	0	0	0	0	0	0	0	0	0	0	1		0	0	3.04167	Female	Private residence/accommodation	N04B	Monday	N	0	0	1	0	1	1	N04	Costing 2014-2015	Dandenong	7900000	8600000	41950.4	41953.5	3	7877.67
3504247	26	3.29	1.67969	1	10	0	0	0	0	0	0	0	0	0	0	0	1		0	0	1.02119	Female	Left against Medical Advice	O05Z	Sunday	Y	0	0	1	0	1	1	O05	Costing 2014-2015	Dandenong	4400000	8600000	41957.9	41959.6	2	3617.48
3508801	37	3.29	4.20703	0	10	0	0	0	0	0	0	0	0	1	0	0	1		0.913889	1316	3.14583	Female	Private residence/accommodation	J08A	Tuesday	N	0	0	1	1	1	1	J08	Costing 2014-2015	Dandenong	4200000	8600000	41964.5	41968.7	4	8155.98
3508668	44	3.29	1.18359	0	10	0	0	0	0	0	0	0	0	0	0	0	1		0	0	1.20833	Female	Private residence/accommodation	I17A	Saturday	N	0	0	1	1	1	1	I17	Costing 2014-2015	Dandenong	7900000	8600000	41964.4	41965.5	1	3552.41
3502805	46	3.29	4.29688	1	10	0	0	0	0	0	0	0	0	0	0	0	1		0	0	4.29167	Female	Private residence/accommodation	N04A	Monday	Y	0	0	1	1	1	1	N04	Costing 2014-2015	Dandenong	1000000	8600000	41956.3	41960.6	4	8203.25
3509554	28	3.29	0.5	1	10	0	0	0	0	0	0	0	0	0	0	0	1		0	0	0.364606	Male	Private residence/accommodation	B07B	Saturday	N	0	0	1	0	1	1	B07	Costing 2014-2015	Dandenong	7900000	8600000	41965.5	41966	1	3144.05
3495655	66	3.29	1.30859	0	10	0	0	0	0	0	0	0	0	0	0	0	1		0	0	1.33333	Male	Statistical Separation	E02B	Monday	Y	0	0	1	0	1	1	E02	Costing 2014-2015	Dandenong	7300000	8600000	41945.2	41946.6	1	3788.42
3500290	82	3.29	4.82031	1	10	0	0	0	0	0	0	0	0	0	0	0	1		0	0	4.00045	Male	Private residence/accommodation	E62B	Friday	Y	0	0	1	0	1	1	E62	Costing 2014-2015	Dandenong	7300000	8600000	41952.7	41957.5	5	5598.53
3507596	91	3.29	8.78516	0	10	0	0	0	1	0	0	1	2	0	0	0	1		0	0	9.44379	Female	Aged care residential facility	F60A	Friday	N	1	0	1	1	1	1	F60	Costing 2014-2015	Dandenong	849029	8600000	41962.7	41971.5	9	8558.39
3509828	46	3.29	1.40625	1	10	0	0	0	0	0	0	0	0	1	0	0	1		0	0	1.35143	Male	Private residence/accommodation	I75B	Monday	Y	0	0	1	0	1	1	I75	Costing 2014-2015	Dandenong	421750	8600000	41966.3	41967.7	1	2644.78
3498534	49	3.29	1.89844	0	10	0	0	0	0	0	0	0	0	0	0	0	1		0	0	5.75247	Female	Private residence/accommodation	X07A	Saturday	Y	0	0	1	1	1	1	X07	Costing 2014-2015	Dandenong	324714	8600000	41949.8	41951.7	2	3164.54
3498052	42	3.29	3.10547	1	10	0	0	0	0	0	0	0	0	0	0	0	1		0	0	2.01159	Male	Other acute hosp/ext care/rehab/geri ctr	H64A	Sunday	N	0	0	1	1	1	1	H64	Costing 2014-2015	Dandenong	710244	8600000	41949.2	41952.3	3	4055.34
3510646	73	3.29	0.15625	0	10	0	0	0	0	0	0	0	0	0	0	0	1		0	0	0.252861	Male	Private residence/accommodation	X06B	Monday	N	0	0	1	0	1	1	X06	Costing 2014-2015	Dandenong	348223	8600000	41967.7	41967.8	1	1598.78
3511376	81	3.29	4.80078	0	10	0	0	0	0	0	0	0	0	0	0	0	1		0	0	4.83333	Female	Private residence/accommodation	I69A	Sunday	N	0	0	1	1	1	1	I69	Costing 2014-2015	Dandenong	2100000	8600000	41968.7	41973.5	5	4876.6
3512524	26	3.29	1.15234	0	10	0	0	0	0	0	0	0	0	0	0	0	1		0	0	3.6448	Male	Private residence/accommodation	X07A	Thursday	N	0	0	1	1	1	1	X07	Costing 2014-2015	Dandenong	7900000	8600000	41969.7	41970.8	1	4920.33
3506081	57	3.29	1.51563	1	10	0	0	0	0	0	0	0	0	0	0	0	1		0	0	1.5	Female	Private residence/accommodation	801B	Wednesday	N	0	0	1	0	1	1	801	Costing 2014-2015	Dandenong	7300000	8600000	41961.3	41962.8	1	5393.62
3497701	46	3.29	1.66016	0	10	0	0	0	0	0	0	0	0	0	0	0	1		0	0	2.24807	Female	Private residence/accommodation	N62Z	Friday	N	0	0	1	0	1	1	N62	Costing 2014-2015	Dandenong	4300000	8600000	41948.8	41950.4	2	2895.98
3510919	21	3.29	0.03125	1	10	0	0	0	0	0	0	0	0	0	0	0	1		0	0	0	Male	Left against Medical Advice	M64Z	Monday	N	0	0	1	0	1	1	M64	Costing 2014-2015	Dandenong	2400000	8600000	41968	41968	1	434.694
3519053	74	3.29	5.68359	0	10	0	0	0	0	0	0	0	0	0	0	0	1		0	0	5.70833	Female	Statistical Separation	I78A	Thursday	Y	0	0	1	1	1	1	I78	Costing 2014-2015	Dandenong	4200000	8600000	41978.8	41984.5	6	6665.71
3511237	27	3.29	0.429688	1	10	0	0	0	0	0	0	0	0	1	0	0	1		0	0	0.416667	Male	Private residence/accommodation	X05B	Tuesday	N	0	0	1	0	1	1	X05	Costing 2014-2015	Dandenong	2300000	8600000	41968.6	41969	1	2505.21
3496188	20	3.29	1.33594	1	10	0	0	0	0	0	0	0	0	0	0	0	1		0	0	1.33333	Male	Private residence/accommodation	X60B	Tuesday	N	0	0	1	0	1	1	X60	Costing 2014-2015	Dandenong	7100000	8600000	41946.4	41947.7	1	1848.95
3504495	73	3.29	5.11719	0	10	0	0	0	0	0	0	0	0	0	0	0	1		0	0	8.41737	Male	Private residence/accommodation	L60A	Thursday	Y	0	0	1	1	1	1	L60	Costing 2014-2015	Dandenong	7900000	8600000	41958.3	41963.4	5	9067.72
3496459	19	3.29	0.964844	0	10	0	0	0	0	0	0	0	0	0	0	0	1		0	0	2.69841	Male	Private residence/accommodation	Y03Z	Tuesday	N	0	0	1	0	1	1	Y03	Costing 2014-2015	Dandenong	7900000	8600000	41946.7	41947.6	1	2180.69
3509071	23	3.29	0.777344	1	10	0	0	0	0	0	0	0	0	0	0	0	1		0	0	0.190246	Female	Private residence/accommodation	O66B	Saturday	N	0	0	1	0	1	1	O66	Costing 2014-2015	Dandenong	2400000	8600000	41964.8	41965.6	1	1183.96
3516435	55	3.29	2.44922	1	10	0	0	0	0	0	0	0	0	0	0	0	1		0	0	2.41667	Female	Private residence/accommodation	D67A	Friday	N	0	0	1	1	1	1	D67	Costing 2014-2015	Dandenong	2100000	8600000	41975.9	41978.4	3	3287.45
3495974	52	3.29	14.1953	0	10	0	0	0	0	0	0	0	0	0	0	0	1		0	0	14.2083	Male	Private residence/accommodation	A06A	Monday	Y	0	0	1	1	1	1	A06	Costing 2014-2015	Dandenong	7900000	8600000	41946.3	41960.5	14	44827.3
3495972	38	3.29	1.1875	0	10	0	0	0	0	0	0	0	0	0	0	0	1		0	0	1.20833	Male	Private residence/accommodation	I17B	Tuesday	N	0	0	1	0	1	1	I17	Costing 2014-2015	Dandenong	717617	8600000	41946.3	41947.5	1	5869.53
3495861	73	3.29	1.875	0	10	0	0	0	0	0	0	0	0	0	0	0	1		0	0	1.875	Male	Private residence/accommodation	X02B	Tuesday	N	0	0	1	0	1	1	X02	Costing 2014-2015	Dandenong	7900000	8600000	41945.6	41947.5	2	2737.27
3502531	40	3.29	1.71484	1	10	0	0	0	0	0	0	0	0	0	0	0	1		0	0	1.39595	Male	Private residence/accommodation	I30Z	Friday	N	0	0	1	0	1	1	I30	Costing 2014-2015	Dandenong	2400000	8600000	41955.8	41957.5	2	5351.49
3495854	71	3.29	4.10156	0	10	0	0	0	0	0	0	0	0	0	0	0	1		0	0	6.84159	Male	Private residence/accommodation	E62A	Thursday	Y	0	0	1	1	1	1	E62	Costing 2014-2015	Dandenong	2200000	8600000	41945.6	41949.8	4	5139.23
3495708	75	3.29	3.62891	0	10	0	0	0	0	0	0	0	0	0	0	0	1		0	0	4.8223	Male	Private residence/accommodation	X06B	Wednesday	Y	0	0	1	0	1	1	X06	Costing 2014-2015	Dandenong	2200000	8600000	41944.9	41948.5	4	4764.79
3506520	64	3.29	0.738281	0	10	0	0	0	0	0	0	0	0	0	0	0	1		0	0	2.02317	Male	Private residence/accommodation	G10B	Wednesday	N	0	0	1	0	1	1	G10	Costing 2014-2015	Dandenong	2300000	8600000	41961.7	41962.5	1	4927.42
3511966	54	3.29	0.917969	0	10	0	0	0	0	0	0	0	0	0	0	0	1		0	0	0.958333	Male	Private residence/accommodation	I12C	Thursday	N	0	0	1	0	1	1	I12	Costing 2014-2015	Dandenong	2100000	8600000	41969.5	41970.4	1	7302.41
3504415	49	3.29	0.820313	0	10	0	0	0	0	0	0	0	0	0	0	0	1		0	0	1.85736	Male	Private residence/accommodation	I30Z	Saturday	N	0	0	1	0	1	1	I30	Costing 2014-2015	Dandenong	7900000	8600000	41957.9	41958.7	1	1941.49
3507625	29	3.29	0.683594	1	10	0	0	0	0	0	0	0	0	0	0	0	1		0	0	0.666667	Female	Private residence/accommodation	O05Z	Thursday	N	0	0	1	0	1	1	O05	Costing 2014-2015	Dandenong	4700000	8600000	41963.3	41964	1	2543.84
3502751	66	3.29	1.80469	0	10	0	0	0	0	0	0	0	0	0	0	0	1		0	0	2.77234	Male	Private residence/accommodation	J64B	Friday	N	0	0	1	0	1	1	J64	Costing 2014-2015	Dandenong	7900000	8600000	41955.7	41957.5	2	2145.7
3497822	23	3.29	15.3672	0	10	0	0	0	0	0	0	0	0	0	0	0	1		6.08819	8767	9.28681	Male	Private residence/accommodation	I02A	Thursday	Y	0	0	1	1	1	1	I02	Costing 2014-2015	Dandenong	2400000	8600000	41948.4	41963.8	15	27144.8
3510769	42	3.29	0.894531	0	10	0	0	0	0	0	0	0	0	0	0	0	1		0	0	1.33574	Female	Private residence/accommodation	X05B	Tuesday	N	0	0	1	0	1	1	X05	Costing 2014-2015	Dandenong	4500000	8600000	41967.9	41968.8	1	1757.95
3500351	50	3.29	0.859375	0	10	0	0	0	0	0	0	0	0	0	0	0	1		0	0	0.875	Male	Private residence/accommodation	D12B	Monday	N	0	0	1	0	1	1	D12	Costing 2014-2015	Dandenong	453941	8600000	41952.6	41953.4	1	2308.86
3499339	49	3.29	1.76563	1	10	0	0	0	0	0	0	0	0	0	0	0	1		0	0	1.56421	Female	Private residence/accommodation	D66B	Sunday	N	0	0	1	0	1	1	D66	Costing 2014-2015	Dandenong	7200000	8600000	41950.7	41952.4	2	2024.16
3508106	77	3.29	3.92578	0	10	0	0	0	0	0	0	0	0	0	0	0	1		0	0	3.95833	Male	Private residence/accommodation	X06B	Monday	Y	0	0	1	0	1	1	X06	Costing 2014-2015	Dandenong	759655	8600000	41963.6	41967.5	4	6000.47
3505035	51	3.29	1.82031	1	10	0	0	0	0	0	0	0	0	0	0	0	1		0	0	1.67684	Male	Private residence/accommodation	B07B	Tuesday	N	0	0	1	0	1	1	B07	Costing 2014-2015	Dandenong	7800000	8600000	41959.6	41961.5	2	5390.54
3505039	36	3.29	1.98828	1	10	0	0	0	0	0	0	0	0	0	0	0	1		0	0	1.95833	Male	Private residence/accommodation	X06B	Tuesday	Y	0	0	1	0	1	1	X06	Costing 2014-2015	Dandenong	2300000	8600000	41959.6	41961.6	2	3199.35
3507082	81	3.29	5.04688	1	10	0	0	0	0	0	0	0	0	0	0	0	1		0	0	5.04167	Female	Private residence/accommodation	J13B	Monday	Y	0	0	1	0	1	1	J13	Costing 2014-2015	Dandenong	4200000	8600000	41962.4	41967.5	5	6188.8
3508552	20	3.29	0.632813	1	10	0	0	0	0	0	0	0	0	0	0	0	1		0	0	0.625	Female	Left against Medical Advice	G66B	Friday	N	0	0	1	0	1	1	G66	Costing 2014-2015	Dandenong	2500000	8600000	41964.1	41964.7	1	1032.49
3511787	40	3.29	5.32422	0	10	0	0	0	0	0	0	0	0	1	0	0	1		0	0	5.33333	Female	Private residence/accommodation	N04A	Monday	Y	0	0	1	1	1	1	N04	Costing 2014-2015	Dandenong	4100000	8600000	41969.3	41974.6	5	10464.3
3501790	51	3.29	1.77344	1	10	0	0	0	0	0	0	0	0	0	0	0	1		0	0	1.75	Male	Other acute hosp/ext care/rehab/geri ctr	L67A	Thursday	N	0	0	1	1	1	1	L67	Costing 2014-2015	Dandenong	4500000	8600000	41954.8	41956.6	2	2887.91
3507101	62	3.29	3.26563	1	10	0	0	0	0	0	0	0	0	0	0	0	1		0	0	3.25	Female	Private residence/accommodation	N04B	Saturday	Y	0	0	1	0	1	1	N04	Costing 2014-2015	Dandenong	4700000	8600000	41962.5	41965.7	3	6828.9
3506772	54	3.29	2.58984	1	10	0	0	0	0	0	0	0	0	0	0	0	1		0	0	1.09029	Male	Private residence/accommodation	X60B	Friday	N	0	0	1	0	1	1	X60	Costing 2014-2015	Dandenong	7900000	8600000	41962	41964.5	3	4030.81
3503554	44	3.29	1.05859	1	10	0	0	0	0	0	0	0	0	0	0	0	1		0	0	1.04167	Female	Private residence/accommodation	X63B	Friday	N	0	0	1	0	1	1	X63	Costing 2014-2015	Dandenong	7900000	8600000	41956.7	41957.7	1	1339.89
3508276	53	3.29	4.51563	1	10	0	0	0	0	0	0	0	0	0	0	0	1		0	0	2.98218	Female	Private residence/accommodation	G65B	Monday	N	0	0	1	0	1	1	G65	Costing 2014-2015	Dandenong	356483	8600000	41963.1	41967.6	4	5763.69
3510677	43	3.29	1.73047	0	10	0	0	0	0	0	0	0	0	0	0	0	1		0	0	3.32157	Male	Private residence/accommodation	J08A	Wednesday	N	0	0	1	1	1	1	J08	Costing 2014-2015	Dandenong	2300000	8600000	41967.7	41969.4	2	3602.91
3511436	81	3.29	4.26953	1	10	0	0	0	0	0	0	0	0	0	0	0	1		0	0	4.25	Female	Private residence/accommodation	J10Z	Saturday	Y	0	0	1	0	1	1	J10	Costing 2014-2015	Dandenong	4200000	8600000	41968.3	41972.6	4	14978.5
3507627	66	3.29	13.3672	1	10	0	0	0	0	0	0	0	0	0	0	0	1		7.94931	11447	5.42569	Female	Private residence/accommodation	J01A	Wednesday	Y	0	0	1	1	1	1	J01	Costing 2014-2015	Dandenong	7300000	8600000	41963.3	41976.7	13	24308.5
3505040	42	3.29	0.742188	0	10	0	0	0	0	0	0	0	0	0	0	0	1		0	0	0.75	Female	Private residence/accommodation	G66A	Monday	N	0	0	1	1	1	1	G66	Costing 2014-2015	Dandenong	318649	8600000	41959.6	41960.4	1	1323.77
3503353	48	3.29	2.66797	0	10	0	0	0	0	0	0	0	0	0	0	0	1		0	0	5.31927	Female	Private residence/accommodation	J64A	Sunday	Y	0	0	1	1	1	1	J64	Costing 2014-2015	Dandenong	4300000	8600000	41956.8	41959.5	3	3896.97
3505004	41	3.29	0.910156	0	10	0	0	0	0	0	0	0	0	0	0	0	1		0	0	2.76789	Female	Private residence/accommodation	J67A	Monday	N	0	0	1	1	1	1	J67	Costing 2014-2015	Dandenong	471494	8600000	41959.5	41960.4	1	1044.65
3503889	40	3.29	27.1836	1	10	0	0	0	0	0	0	0	0	0	0	0	1		16.975	24444	10.2333	Female	Private residence/accommodation	N04A	Thursday	Y	0	0	1	1	1	1	N04	Costing 2014-2015	Dandenong	4200000	8600000	41957.4	41984.6	18	64044.5
3495378	20	3.29	0.574219	0	10	0	0	0	0	0	0	0	0	0	0	0	1		0	0	0.938577	Male	Private residence/accommodation	Y62B	Sunday	N	0	0	1	0	1	1	Y62	Costing 2014-2015	Dandenong	7900000	8600000	41944.9	41945.5	1	757.92
3500043	45	3.29	1.26953	1	10	0	0	0	0	0	0	0	0	0	0	0	1		0	0	1.25	Male	Private residence/accommodation	I27B	Monday	N	0	0	1	0	1	1	I27	Costing 2014-2015	Dandenong	4700000	8600000	41952.1	41953.4	1	3439.41
3515086	81	3.29	4.21484	0	10	0	0	0	2	0	0	0	2	0	0	0	1		0	0	4.25	Male	Private residence/accommodation	J08A	Friday	Y	1	0	1	1	1	1	J08	Costing 2014-2015	Dandenong	7900000	8600000	41974.3	41978.5	4	23919.3
3508778	81	3.29	5.24609	0	10	0	0	0	0	0	0	0	0	0	0	0	1		0	0	5.25	Female	Private residence/accommodation	D14A	Wednesday	Y	0	0	1	1	1	1	D14	Costing 2014-2015	Dandenong	2100000	8600000	41964.4	41969.7	5	7842.47
3501493	71	3.29	1.02734	0	10	0	0	0	0	0	0	0	0	0	0	0	1		0	0	1.04167	Male	Private residence/accommodation	D04Z	Wednesday	N	0	0	1	0	1	1	D04	Costing 2014-2015	Dandenong	2400000	8600000	41954.5	41955.5	1	4980.63
3509073	23	3.29	1.07813	0	10	0	0	0	0	0	0	0	0	0	0	0	1		0	0	1.10731	Female	Private residence/accommodation	N09Z	Saturday	N	0	0	1	0	1	1	N09	Costing 2014-2015	Dandenong	7700000	8600000	41964.8	41965.9	1	2269.51
3518327	21	3.29	1.39453	0	10	0	0	0	0	0	0	0	0	0	0	0	1		0	0	1.41667	Female	Private residence/accommodation	J08B	Saturday	Y	0	0	1	0	1	1	J08	Costing 2014-2015	Dandenong	713247	8600000	41978.3	41979.7	1	2982.65
3504287	25	3.29	3.09766	1	10	0	0	0	0	0	0	0	0	0	0	0	1		0	0	3.08333	Male	Private residence/accommodation	D04Z	Monday	N	0	0	1	0	1	1	D04	Costing 2014-2015	Dandenong	4500000	8600000	41957.3	41960.4	3	7079.3
3509723	57	3.29	2.66016	1	10	0	0	0	0	0	0	0	0	0	0	0	1		0	0	1.8746	Female	Private residence/accommodation	X63B	Tuesday	N	0	0	1	0	1	1	X63	Costing 2014-2015	Dandenong	4300000	8600000	41965.8	41968.5	3	3005.06
3512138	34	3.29	18.8594	1	10	0	0	0	0	0	0	0	0	0	0	0	1		0	0	18.8333	Female	Other acute hosp/ext care/rehab/geri ctr	F21B	Monday	Y	0	0	1	0	1	1	F21	Costing 2014-2015	Dandenong	7800000	8600000	41969.6	41988.4	19	19338.8
3495411	75	3.29	9.94922	1	10	0	0	0	0	0	0	0	0	1	0	0	1		0	0	6.84159	Female	Private residence/accommodation	E62A	Tuesday	N	0	0	1	1	1	1	E62	Costing 2014-2015	Dandenong	2000000	8600000	41944.4	41954.4	10	9273.08
3495489	20	3.29	0.214844	0	10	0	0	0	0	0	0	0	0	0	0	0	1		0	0	0.314992	Male	Private residence/accommodation	I28B	Saturday	N	0	0	1	0	1	1	I28	Costing 2014-2015	Dandenong	4200000	8600000	41944.6	41944.8	1	1073.84
3496226	58	3.29	3.93359	1	10	0	0	0	0	0	0	0	0	0	0	0	1		0	0	3.91667	Male	Private residence/accommodation	J64A	Friday	N	0	0	1	1	1	1	J64	Costing 2014-2015	Dandenong	2100000	8600000	41946.5	41950.4	4	6881.22
3505199	83	3.29	0.328125	0	10	0	0	0	0	0	0	0	0	0	0	0	1		0	0	0.333333	Male	Private residence/accommodation	J08C	Monday	N	0	0	1	0	1	1	J08	Costing 2014-2015	Dandenong	4200000	8600000	41960.3	41960.6	1	1623.8
3495981	47	3.29	1.1875	0	10	0	0	0	0	0	0	0	0	0	0	0	1		0	0	1.20833	Male	Private residence/accommodation	D04Z	Tuesday	N	0	0	1	0	1	1	D04	Costing 2014-2015	Dandenong	716007	8600000	41946.3	41947.5	1	7996.28
3506771	46	3.29	2.67578	1	10	0	0	0	0	0	0	0	0	0	0	0	1		0	0	2.66667	Female	Private residence/accommodation	T63B	Friday	N	0	0	1	0	1	1	T63	Costing 2014-2015	Dandenong	4400000	8600000	41961.9	41964.6	3	4465.96
3506496	38	3.29	1.18359	0	10	0	0	0	0	0	0	0	0	0	0	0	1		0	0	1.65153	Female	Private residence/accommodation	O03B	Wednesday	N	0	0	1	0	1	1	O03	Costing 2014-2015	Dandenong	7800000	8600000	41961.7	41962.9	1	3900.78
3505198	74	3.29	24.1523	0	10	0	0	0	0	0	0	0	0	0	0	0	1		0	0	24.1667	Female	Other acute hosp/ext care/rehab/geri ctr	A06C	Thursday	Y	0	0	1	0	1	1	A06	Costing 2014-2015	Dandenong	4100000	8600000	41960.3	41984.4	24	54155.6
3513409	71	3.29	36.4023	1	10	0	0	0	0	0	0	0	0	0	0	0	1		22.7007	32689	8.03744	Male	Aged care residential facility	E62A	Saturday	Y	0	0	1	1	1	1	E62	Costing 2014-2015	Dandenong	7100000	8600000	41971	42007.4	36	24774.9
3513177	39	3.29	5.1875	1	10	0	0	0	0	0	0	0	0	0	0	0	1		0	0	5.16667	Male	Private residence/accommodation	X07B	Tuesday	Y	0	0	1	0	1	1	X07	Costing 2014-2015	Dandenong	7900000	8600000	41970.3	41975.5	5	8560.48
3516839	40	3.29	3.07422	0	10	0	0	0	0	0	0	0	0	0	0	0	1		0	0	3.22392	Male	Private residence/accommodation	X06A	Saturday	N	0	0	1	1	1	1	X06	Costing 2014-2015	Dandenong	4400000	8600000	41976.4	41979.5	3	4570.11
3510771	50	3.29	9.73047	0	10	0	0	0	1	0	0	1	2	0	0	0	1		0	0	9.75	Male	Private residence/accommodation	X02A	Thursday	Y	1	0	1	1	1	1	X02	Costing 2014-2015	Dandenong	7900000	8600000	41967.8	41977.5	10	51448.7
3495611	24	3.29	0.761719	0	10	0	0	0	0	0	0	0	0	0	0	0	1		0	0	2.4696	Male	Left against Medical Advice	J64B	Sunday	N	0	0	1	0	1	1	J64	Costing 2014-2015	Dandenong	2400000	8600000	41945	41945.7	1	888.655
3514670	87	3.29	2.42188	0	10	0	0	0	0	0	0	0	0	0	0	0	1		0	0	6.88595	Male	Private residence/accommodation	E62A	Tuesday	N	0	0	1	1	1	1	E62	Costing 2014-2015	Dandenong	7200000	8600000	41973	41975.4	2	2333.74
3495590	23	3.29	1.16406	0	10	0	0	0	0	0	0	0	0	0	0	0	1		0	0	3.86879	Female	Private residence/accommodation	X02A	Sunday	N	0	0	1	1	1	1	X02	Costing 2014-2015	Dandenong	7900000	8600000	41944.7	41945.9	1	3487.71
3507646	58	3.29	4.53125	0	10	0	0	0	0	0	0	0	0	0	0	0	1		0	0	4.54167	Female	Private residence/accommodation	N04A	Monday	N	0	0	1	1	1	1	N04	Costing 2014-2015	Dandenong	7500000	8600000	41963.3	41967.8	4	12773
3501199	48	3.29	2.45313	0	10	0	0	0	0	0	0	0	0	0	0	0	1		0	0	2.45833	Male	Private residence/accommodation	801C	Thursday	N	0	0	1	0	1	1	801	Costing 2014-2015	Dandenong	2300000	8600000	41954.3	41956.8	2	16922.4
3505798	20	3.29	0.949219	0	10	0	0	0	0	0	0	0	0	0	0	0	1		0	0	1.48538	Male	Private residence/accommodation	I30Z	Tuesday	N	0	0	1	0	1	1	I30	Costing 2014-2015	Dandenong	2500000	8600000	41960.8	41961.7	1	5213.62
3511399	51	3.29	0.636719	0	10	0	0	0	0	0	0	0	0	0	0	0	1		0	0	1.54716	Male	Private residence/accommodation	I30Z	Wednesday	N	0	0	1	0	1	1	I30	Costing 2014-2015	Dandenong	7200000	8600000	41968.8	41969.4	1	5019.02
3510050	29	3.29	1.57813	1	10	0	0	0	0	0	0	0	0	0	0	0	1		0	0	1.27963	Male	Private residence/accommodation	I71B	Tuesday	N	0	0	1	0	1	1	I71	Costing 2014-2015	Dandenong	7700000	8600000	41966.9	41968.5	2	2196.98
3514733	52	3.29	5.95313	1	10	0	0	0	0	0	0	0	0	0	0	0	1		0	0	5.07457	Female	Private residence/accommodation	L63A	Friday	N	0	0	1	1	1	1	L63	Costing 2014-2015	Dandenong	4100000	8600000	41972.7	41978.7	6	6808.25
3496296	18	3.29	0.878906	1	10	0	0	0	0	0	0	0	0	0	0	0	1		0	0	0.875	Male	Private residence/accommodation	D04Z	Tuesday	N	0	0	1	0	1	1	D04	Costing 2014-2015	Dandenong	2500000	8600000	41946.5	41947.4	1	4390.01
3495848	25	3.29	1.23828	1	10	0	0	0	0	0	0	0	0	0	0	0	1		0	0	1.02119	Female	Private residence/accommodation	O05Z	Monday	N	0	0	1	0	1	1	O05	Costing 2014-2015	Dandenong	7700000	8600000	41945.6	41946.9	1	2943.03
3513478	45	3.29	2.20703	0	10	0	0	0	0	0	0	0	0	0	0	0	1		0	0	2.20833	Female	Private residence/accommodation	N04B	Sunday	N	0	0	1	0	1	1	N04	Costing 2014-2015	Dandenong	2200000	8600000	41971.3	41973.5	2	7498.82
3516491	46	3.29	4.43359	0	10	0	0	0	0	0	0	0	0	0	0	0	1		0	0	4.45833	Female	Private residence/accommodation	J06A	Saturday	N	0	0	1	1	1	1	J06	Costing 2014-2015	Dandenong	7900000	8600000	41975.4	41979.9	4	11558.5
3506090	44	3.29	5.57031	1	10	0	0	0	0	0	0	0	0	0	0	0	1		3.27014	4709	2.27153	Female	Private residence/accommodation	J06B	Sunday	N	0	0	1	0	1	1	J06	Costing 2014-2015	Dandenong	2500000	8600000	41961.3	41966.9	5	9634.79
3505383	22	3.29	0.667969	0	10	0	0	0	0	0	0	0	0	0	0	0	1		0	0	0.708333	Male	Private residence/accommodation	X05B	Monday	N	0	0	1	0	1	1	X05	Costing 2014-2015	Dandenong	7900000	8600000	41960.3	41961	1	1374.13
3498491	84	3.29	32.7969	1	10	0	0	0	0	0	0	0	0	0	0	0	1		0	0	32.7917	Female	Aged care residential facility	J13A	Tuesday	Y	0	0	1	1	1	1	J13	Costing 2014-2015	Dandenong	7000000	8600000	41949.7	41982.5	33	40971.9
3507354	82	3.29	1.09375	1	10	0	0	0	0	0	0	0	0	0	0	0	1		0	0	1.08333	Female	Private residence/accommodation	D62A	Thursday	N	0	0	1	1	1	1	D62	Costing 2014-2015	Dandenong	7900000	8600000	41962.7	41963.8	1	1784.38
3500289	73	3.29	22.9453	0	10	0	0	0	0	0	0	0	0	0	0	0	1		0	0	22.9583	Male	Other acute hosp/ext care/rehab/geri ctr	J01A	Tuesday	Y	0	0	1	1	1	1	J01	Costing 2014-2015	Dandenong	7900000	8600000	41952.7	41975.6	23	64941.6
3514681	45	3.29	21.5352	1	10	0	0	0	1	0	0	0	1	0	0	0	1		0	0	6.41618	Female	Private residence/accommodation	X06A	Sunday	Y	1	0	1	1	1	1	X06	Costing 2014-2015	Dandenong	4000000	8600000	41973.2	41994.7	21	32097.6
3517639	36	3.29	1.04297	0	10	0	0	0	0	0	0	0	0	0	0	0	1		0	0	1.26458	Female	Private residence/accommodation	G67B	Friday	N	0	0	1	0	1	1	G67	Costing 2014-2015	Dandenong	7900000	8600000	41977.4	41978.4	1	1985.44
3515913	60	3.29	0.445313	1	10	0	0	0	0	0	0	0	0	1	0	0	1		0	0	0.252627	Male	Private residence/accommodation	J67B	Tuesday	N	0	0	1	0	1	1	J67	Costing 2014-2015	Dandenong	2300000	8600000	41975.1	41975.5	1	492.898
3506133	19	3.29	2.21484	1	10	0	0	0	0	0	0	0	0	0	0	0	1		0	0	2.20833	Female	Private residence/accommodation	D04Z	Thursday	Y	0	0	1	0	1	1	D04	Costing 2014-2015	Dandenong	7200000	8600000	41961.3	41963.5	2	8738.19
3510897	61	3.29	5.24609	0	10	0	0	0	0	0	0	0	0	0	0	0	1		0	0	5.25	Male	Private residence/accommodation	D02A	Sunday	Y	0	0	1	1	1	1	D02	Costing 2014-2015	Dandenong	7900000	8600000	41968.3	41973.5	5	9851.66
3500415	39	3.29	2.02344	0	10	0	0	0	0	0	0	0	0	0	0	0	1		0	0	2.04167	Female	Private residence/accommodation	N07A	Wednesday	N	0	0	1	1	1	1	N07	Costing 2014-2015	Dandenong	7700000	8600000	41953.3	41955.3	2	4648
3509870	77	3.29	24.6445	0	10	0	0	0	0	0	0	0	0	0	0	0	1		0	0	24.6667	Female	Statistical Separation	J08A	Wednesday	Y	0	0	1	1	1	1	J08	Costing 2014-2015	Dandenong	4700000	8600000	41965.8	41990.5	25	46126
3498847	21	3.29	8.375	1	10	0	0	0	0	0	0	0	0	0	0	0	1		1.21597	1751	4.10694	Male	Private residence/accommodation	X07A	Friday	N	0	0	1	1	1	1	X07	Costing 2014-2015	Dandenong	2400000	8600000	41949.3	41957.7	6	8433.84
3518194	57	3.29	3.88281	1	10	0	0	0	0	0	0	0	0	0	0	0	1		0	0	3.875	Female	Private residence/accommodation	D66B	Monday	Y	0	0	1	0	1	1	D66	Costing 2014-2015	Dandenong	2200000	8600000	41977.6	41981.5	4	7404.97
3513379	36	3.29	3.57813	0	10	0	0	0	0	0	0	0	0	0	0	0	1		0	0	3.58333	Male	Private residence/accommodation	X07A	Monday	Y	0	0	1	1	1	1	X07	Costing 2014-2015	Dandenong	345393	8600000	41970.9	41974.4	4	5289.62
3498263	30	3.29	1.30078	1	10	0	0	0	0	0	0	0	0	0	0	0	1		0	0	1.29167	Female	Private residence/accommodation	N04B	Friday	N	0	0	1	0	1	1	N04	Costing 2014-2015	Dandenong	7200000	8600000	41949.4	41950.7	1	6158.15
3495336	77	3.29	0.296875	0	10	0	0	0	0	0	0	0	0	0	0	0	1		0	0	0.333333	Female	Private residence/accommodation	X60B	Saturday	N	0	0	1	0	1	1	X60	Costing 2014-2015	Dandenong	4600000	8600000	41944.3	41944.6	1	1041.56
3507070	49	3.29	9.14063	1	10	0	0	0	0	0	0	0	0	0	0	0	1		5.84028	8410	3.32639	Male	Private residence/accommodation	D05Z	Friday	N	0	0	1	0	1	1	D05	Costing 2014-2015	Dandenong	2300000	8600000	41962.4	41971.6	9	8550.77
3508622	29	3.29	0.371094	0	10	0	0	0	0	0	0	0	0	0	0	0	1		0	0	0.375	Female	Private residence/accommodation	N08Z	Friday	N	0	0	1	0	1	1	N08	Costing 2014-2015	Dandenong	2400000	8600000	41964.3	41964.7	1	3373.21
3500442	25	3.29	1.41797	1	10	0	0	0	0	0	0	0	0	0	0	0	1		0	0	0.875916	Female	Private residence/accommodation	X60B	Tuesday	N	0	0	1	0	1	1	X60	Costing 2014-2015	Dandenong	2500000	8600000	41953	41954.4	1	2616.44
3512286	77	3.29	8.91406	0	10	0	0	0	0	0	0	0	0	0	0	0	1		0	0	8.91667	Male	Private residence/accommodation	J13A	Friday	Y	0	0	1	1	1	1	J13	Costing 2014-2015	Dandenong	749335	8600000	41969.8	41978.7	9	11722.5
3514859	84	3.29	1.07422	0	10	0	0	0	0	0	0	0	0	0	0	0	1		0	0	1.08333	Female	Private residence/accommodation	X06A	Monday	Y	0	0	1	1	1	1	X06	Costing 2014-2015	Dandenong	61307	8600000	41973.5	41974.5	1	2099.93
3510133	31	3.29	1.57422	1	10	0	0	0	0	0	0	0	0	0	0	0	1		0	0	1.37875	Male	Private residence/accommodation	J64B	Tuesday	N	0	0	1	0	1	1	J64	Costing 2014-2015	Dandenong	7900000	8600000	41966.9	41968.5	2	2039.08
3510933	44	3.29	6.35156	0	10	0	0	0	0	0	0	2	2	0	0	0	1		0	0	6.375	Male	Private residence/accommodation	D12A	Monday	Y	1	0	1	1	1	1	D12	Costing 2014-2015	Dandenong	4300000	8600000	41968.2	41974.5	6	23435.3
3515835	46	3.29	6.33984	0	10	0	0	0	0	0	0	0	0	0	0	0	1		0	0	6.375	Female	Private residence/accommodation	J06A	Monday	Y	0	0	1	1	1	1	J06	Costing 2014-2015	Dandenong	7900000	8600000	41975.3	41981.6	6	14627.1
3496481	29	3.29	1.66797	0	10	0	0	0	0	0	0	0	0	0	0	0	1		0	0	3.04224	Female	Private residence/accommodation	H08B	Wednesday	N	0	0	1	0	1	1	H08	Costing 2014-2015	Dandenong	7000000	8600000	41946.8	41948.4	2	5584.24
3506037	35	3.29	0.375	1	10	0	0	0	0	0	0	0	0	0	0	0	1		0	0	0.296269	Female	Private residence/accommodation	O05Z	Tuesday	N	0	0	1	0	1	1	O05	Costing 2014-2015	Dandenong	7900000	8600000	41961.3	41961.7	1	1386.43
3498508	78	3.29	8.66016	0	10	0	0	0	0	0	0	0	0	0	0	0	1		0	0	9.02464	Male	Private residence/accommodation	H43A	Saturday	Y	0	0	1	1	1	1	H43	Costing 2014-2015	Dandenong	2400000	8600000	41949.8	41958.5	9	9951.55
3509336	94	3.29	8.35156	1	10	0	0	0	1	0	0	1	2	0	0	0	1		0	0	8.33333	Female	Aged care residential facility	E40A	Sunday	Y	1	0	1	1	1	1	E40	Costing 2014-2015	Dandenong	7200000	8600000	41965.1	41973.4	8	24236.6
3509736	87	3.29	2.50781	0	10	0	0	0	0	0	0	0	0	0	0	0	1		0	0	7.92862	Female	Other acute hosp/ext care/rehab/geri ctr	X07B	Tuesday	Y	0	0	1	0	1	1	X07	Costing 2014-2015	Dandenong	2500000	8600000	41966	41968.5	3	4652.65
3530391	87	3.49	1.66797	0	11	0	0	0	0	0	0	0	0	0	0	0	1		0	0	1.79639	Male	Private residence/accommodation	X63B	Wednesday	Y	0	0	1	0	1	1	X63	Costing 2014-2015	Dandenong	744778	8600000	41995.8	41997.5	2	2533.98
3521878	48	3.49	0.09375	1	11	0	0	0	0	0	0	0	0	0	0	0	1		0	0	0.083333	Male	Private residence/accommodation	X60B	Wednesday	N	0	0	1	0	1	1	X60	Costing 2014-2015	Dandenong	7900000	8600000	41983.6	41983.7	1	240.04
3527969	85	3.49	27.3086	1	11	0	0	0	2	0	0	0	2	0	0	0	1		0	0	27.2917	Female	Other acute hosp/ext care/rehab/geri ctr	A06A	Thursday	Y	1	0	1	1	1	1	A06	Costing 2014-2015	Dandenong	2000000	8600000	41992.3	42019.6	27	74285.5
3531285	55	3.49	2.99219	0	11	0	0	0	0	0	0	0	0	1	0	0	1		0	0	3	Male	Private residence/accommodation	X02A	Friday	N	0	0	1	1	1	1	X02	Costing 2014-2015	Dandenong	487816	8600000	41996.4	41999.4	3	14864.8
3535871	48	3.49	0.894531	0	11	0	0	0	0	0	0	0	0	0	0	0	1		0	0	1.48439	Male	Private residence/accommodation	X60B	Thursday	N	0	0	1	0	1	1	X60	Costing 2014-2015	Dandenong	2400000	8600000	42004.9	42005.8	1	1023.17
3520884	25	3.49	0.628906	1	11	0	0	0	0	0	0	0	0	0	0	0	1		0	0	0.625	Male	Private residence/accommodation	I30Z	Wednesday	N	0	0	1	0	1	1	I30	Costing 2014-2015	Dandenong	7900000	8600000	41982.4	41983.1	1	3331.84
3531385	31	3.49	1.59375	0	11	0	0	0	0	0	0	0	0	0	0	0	1		0	0	1.625	Male	Private residence/accommodation	J08A	Thursday	N	0	0	1	1	1	1	J08	Costing 2014-2015	Dandenong	4600000	8600000	41997	41998.6	2	2777.05
3534467	80	3.49	3.73438	0	11	0	0	0	0	0	0	0	0	0	0	0	1		0	0	6.28794	Female	Private residence/accommodation	J64A	Friday	N	0	0	1	1	1	1	J64	Costing 2014-2015	Dandenong	7300000	8600000	42002.9	42006.6	4	5905
3534365	51	3.49	5.86719	0	11	1	0	0	0	0	0	0	1	0	0	0	1		0	0	7.68822	Male	Death	H61A	Sunday	Y	1	0	1	1	1	1	H61	Costing 2014-2015	Dandenong	7800000	8600000	42002.8	42008.7	6	4554.44
3532525	43	3.49	2.95313	0	11	0	0	0	0	0	0	0	0	0	0	0	1		0	0	2.95833	Male	Private residence/accommodation	J64A	Monday	N	0	0	1	1	1	1	J64	Costing 2014-2015	Dandenong	2100000	8600000	41999.4	42002.4	3	3933.51
3527182	52	3.49	61.332	0	11	0	0	0	0	0	0	0	0	0	0	0	1		16.8708	24294	44.4389	Female	Private residence/accommodation	J14Z	Tuesday	Y	0	0	1	0	1	1	J14	Costing 2014-2015	Dandenong	7300000	8600000	41991.3	42052.6	61	80704.9
3519423	27	3.49	2.86719	1	11	0	0	0	0	0	0	0	0	0	0	0	1		1.95556	2816	1.37875	Female	Private residence/accommodation	J64B	Tuesday	N	0	0	1	0	1	1	J64	Costing 2014-2015	Dandenong	7900000	8600000	41979.7	41982.6	3	4379.98
3532386	76	3.49	0.089844	0	11	0	0	0	0	0	0	0	0	0	0	0	1		0	0	0.233033	Male	Private residence/accommodation	X60B	Friday	N	0	0	1	0	1	1	X60	Costing 2014-2015	Dandenong	2100000	8600000	41999.3	41999.4	1	236.573
3533271	36	3.49	1.78125	1	11	0	0	0	0	0	0	0	0	0	0	0	1		0	0	1.75	Male	Private residence/accommodation	B07A	Monday	N	0	0	1	1	1	1	B07	Costing 2014-2015	Dandenong	2100000	8600000	42000.8	42002.6	2	4362.24
3527983	75	3.49	5.19531	0	11	0	0	0	0	0	0	0	0	0	0	0	1		0	0	5.20833	Female	Private residence/accommodation	J12B	Wednesday	Y	0	0	1	0	1	1	J12	Costing 2014-2015	Dandenong	2200000	8600000	41992.3	41997.5	5	7156.73
3519516	67	3.49	1.61328	0	11	0	0	0	0	0	0	0	0	0	0	0	1		0	0	1.66251	Female	Private residence/accommodation	I30Z	Monday	N	0	0	1	0	1	1	I30	Costing 2014-2015	Dandenong	4500000	8600000	41980.1	41981.7	1	2706.55
3522453	23	3.49	1.16797	1	11	0	0	0	0	0	0	0	0	0	0	0	1		0	0	0.734735	Male	Other acute hosp/ext care/rehab/geri ctr	X60B	Friday	N	0	0	1	0	1	1	X60	Costing 2014-2015	Dandenong	7100000	8600000	41984.3	41985.5	1	1397.33
3530148	22	3.49	15.125	0	11	0	0	0	0	0	0	0	0	0	0	0	1		1.11806	1610	14.0486	Male	Other acute hosp/ext care/rehab/geri ctr	Y02A	Tuesday	Y	0	0	1	1	1	1	Y02	Costing 2014-2015	Dandenong	4400000	8600000	41995.5	42010.6	15	30707.4
3535681	37	3.49	1.02734	0	11	0	0	0	0	0	0	0	0	0	0	0	1		0	0	2.07117	Male	Private residence/accommodation	I28B	Thursday	N	0	0	1	0	1	1	I28	Costing 2014-2015	Dandenong	2400000	8600000	42004.8	42005.8	1	2426.4
3520078	87	3.49	6.26172	1	11	0	0	0	0	0	0	0	0	0	0	0	1		0	0	6.25	Male	Private residence/accommodation	J13B	Sunday	Y	0	0	1	0	1	1	J13	Costing 2014-2015	Dandenong	864789	8600000	41981.4	41987.6	6	7415.89
3523372	29	3.49	2.0625	0	11	0	0	0	0	0	0	0	0	0	0	0	1		0	0	2.08333	Female	Private residence/accommodation	I72B	Sunday	N	0	0	1	0	1	1	I72	Costing 2014-2015	Dandenong	7700000	8600000	41985.4	41987.5	2	2051.02
3533753	42	3.49	1.59375	0	11	0	0	0	0	0	0	0	0	1	0	0	1		0	0	2.26228	Male	Private residence/accommodation	J60B	Tuesday	N	0	0	1	0	1	1	J60	Costing 2014-2015	Dandenong	332093	8600000	42001.9	42003.5	2	2104.35
3519431	41	3.49	1.82813	0	11	0	0	0	0	0	0	0	0	0	0	0	1		0	0	3.12541	Female	Private residence/accommodation	H08B	Monday	N	0	0	1	0	1	1	H08	Costing 2014-2015	Dandenong	7900000	8600000	41979.8	41981.6	2	6087.27
3523201	91	3.49	0.683594	1	11	0	0	0	0	0	0	0	0	0	0	0	1		0	0	0.666667	Female	Private residence/accommodation	I30Z	Friday	N	0	0	1	0	1	1	I30	Costing 2014-2015	Dandenong	4600000	8600000	41985.2	41985.9	1	1689.82
3531987	54	3.49	2.12109	0	11	0	0	0	0	0	0	0	0	0	0	0	1		0	0	2.125	Male	Private residence/accommodation	J12C	Friday	N	0	0	1	0	1	1	J12	Costing 2014-2015	Dandenong	7900000	8600000	41997.4	41999.5	2	2959.13
3519963	35	3.49	2.25781	0	11	0	0	0	0	0	0	0	0	0	0	0	1		0	0	3.22392	Male	Private residence/accommodation	X06A	Wednesday	N	0	0	1	1	1	1	X06	Costing 2014-2015	Dandenong	4700000	8600000	41981.3	41983.5	2	3514.38
3535157	57	3.49	0.535156	0	11	0	0	0	0	0	0	0	0	0	0	0	1		0	0	2.12689	Male	Private residence/accommodation	G70B	Wednesday	N	0	0	1	0	1	1	G70	Costing 2014-2015	Dandenong	2100000	8600000	42003.9	42004.4	1	683.465
3535537	58	3.49	1.08594	1	11	0	0	0	0	0	0	0	0	0	0	0	1		0	0	1.08333	Male	Private residence/accommodation	Y62B	Thursday	N	0	0	1	0	1	1	Y62	Costing 2014-2015	Dandenong	7900000	8600000	42004.6	42005.6	1	1166.29
3534261	29	3.49	1.95313	0	11	0	0	0	0	0	0	0	0	0	0	0	1		0	0	2.64639	Female	Private residence/accommodation	G07A	Wednesday	N	0	0	1	1	1	1	G07	Costing 2014-2015	Dandenong	2300000	8600000	42002.6	42004.6	2	5280.84
3535888	44	3.49	1.23828	0	11	0	0	0	0	0	0	0	0	0	0	0	1		0	0	1.25	Male	Private residence/accommodation	B07B	Friday	N	0	0	1	0	1	1	B07	Costing 2014-2015	Dandenong	2300000	8600000	42005.3	42006.6	1	3561.01
3535188	75	3.49	7.6875	0	11	0	0	0	0	0	0	0	0	0	0	0	1		0	0	7.70833	Male	Private residence/accommodation	H02A	Wednesday	N	0	0	1	1	1	1	H02	Costing 2014-2015	Dandenong	4600000	8600000	42004	42011.7	7	8654.36
3527257	43	3.49	0.738281	0	11	0	0	0	0	0	0	0	0	0	0	0	1		0	0	0.75	Male	Private residence/accommodation	I27C	Thursday	N	0	0	1	0	1	1	I27	Costing 2014-2015	Dandenong	4100000	8600000	41991.1	41991.8	1	2211.79
3524315	28	3.49	5.89063	1	11	0	0	0	0	0	0	0	0	0	0	0	1		4.975	7164	1.63001	Female	Private residence/accommodation	G11Z	Friday	N	0	0	1	0	1	1	G11	Costing 2014-2015	Dandenong	7100000	8600000	41986.7	41992.6	6	4788.47
3532385	31	3.49	1.20703	0	11	0	0	0	0	0	0	0	0	0	0	0	1		0	0	1.20833	Male	Private residence/accommodation	X02B	Saturday	N	0	0	1	0	1	1	X02	Costing 2014-2015	Dandenong	2400000	8600000	41999.3	42000.5	1	2087.14
3533274	89	3.49	3.75391	0	11	0	0	0	0	0	0	0	0	0	0	0	1		0	0	7.07376	Female	Private residence/accommodation	C60A	Wednesday	Y	0	0	1	1	1	1	C60	Costing 2014-2015	Dandenong	2300000	8600000	42001	42004.7	4	5200.83
3528737	49	3.49	2.57031	1	11	0	0	0	0	0	0	0	0	0	0	0	1		0	0	2.3261	Female	Private residence/accommodation	D66A	Monday	N	0	0	1	1	1	1	D66	Costing 2014-2015	Dandenong	7200000	8600000	41992.8	41995.4	3	2698.26
3536141	22	3.49	5.21484	1	11	0	0	0	0	0	0	0	0	0	0	0	1		0	0	5.20833	Male	Private residence/accommodation	Y02C	Wednesday	N	0	0	1	0	1	1	Y02	Costing 2014-2015	Dandenong	7900000	8600000	42006.3	42011.5	5	6458.01
3522902	32	3.49	2.67969	1	11	0	0	0	0	0	0	0	0	0	0	0	1		0	0	1.37875	Female	Private residence/accommodation	J64B	Sunday	N	0	0	1	0	1	1	J64	Costing 2014-2015	Dandenong	4500000	8600000	41984.8	41987.5	3	3887.68
3531986	51	3.49	1.04297	0	11	0	0	0	0	0	0	0	0	0	0	0	1		0	0	1.68168	Male	Private residence/accommodation	I30Z	Thursday	N	0	0	1	0	1	1	I30	Costing 2014-2015	Dandenong	2300000	8600000	41997.4	41998.5	1	2513.73
3535890	34	3.49	0.476563	1	11	0	0	0	0	0	0	0	0	0	0	0	1		0	0	0.458333	Male	Private residence/accommodation	X05B	Thursday	N	0	0	1	0	1	1	X05	Costing 2014-2015	Dandenong	4600000	8600000	42005.3	42005.8	1	1569.18
3528381	35	3.49	1.02344	1	11	0	0	0	0	0	0	0	0	1	0	0	1		0	0	0.969683	Female	Private residence/accommodation	O05Z	Saturday	N	0	0	1	0	1	1	O05	Costing 2014-2015	Dandenong	2500000	8600000	41992.7	41993.7	1	2206.75
3528425	59	3.49	2.92578	1	11	0	0	0	0	0	0	0	0	0	0	0	1		0	0	1.81013	Male	Private residence/accommodation	D66B	Monday	N	0	0	1	0	1	1	D66	Costing 2014-2015	Dandenong	4400000	8600000	41992.6	41995.5	3	2895.95
3535943	61	3.49	3.03516	1	11	0	0	0	0	0	0	0	0	0	0	0	1		0	0	2.5782	Female	Private residence/accommodation	X63A	Sunday	N	0	0	1	1	1	1	X63	Costing 2014-2015	Dandenong	2300000	8600000	42005.4	42008.5	3	3931.99
3533182	48	3.49	1.02344	0	11	0	0	0	0	0	0	0	0	0	0	0	1		0	0	1.95477	Male	Private residence/accommodation	I27B	Sunday	N	0	0	1	0	1	1	I27	Costing 2014-2015	Dandenong	7100000	8600000	42000.7	42001.7	1	2397.09
3524510	27	3.49	7.85938	0	11	0	0	0	0	0	0	0	0	0	0	0	1		0	0	7.875	Male	Private residence/accommodation	I12A	Sunday	N	0	0	1	1	1	1	I12	Costing 2014-2015	Dandenong	7900000	8600000	41986.7	41994.5	8	11910.1
3536127	77	3.49	2.29688	0	11	0	0	0	0	0	0	0	0	0	0	0	1		0	0	3.18322	Female	Private residence/accommodation	G61A	Sunday	Y	0	0	1	1	1	1	G61	Costing 2014-2015	Dandenong	4100000	8600000	42006.2	42008.5	2	2079.19
3523249	39	3.49	1.32422	0	11	0	0	0	0	0	0	0	0	0	0	0	1		0	0	1.33333	Male	Private residence/accommodation	C11Z	Saturday	N	0	0	1	0	1	1	C11	Costing 2014-2015	Dandenong	7900000	8600000	41985.3	41986.6	1	2645.74
3524942	35	3.49	3.125	0	11	0	0	0	0	0	0	0	0	0	0	0	1		0	0	3.6535	Male	Private residence/accommodation	X06A	Thursday	N	0	0	1	1	1	1	X06	Costing 2014-2015	Dandenong	7900000	8600000	41988.3	41991.4	3	5411.08
3524809	41	3.49	3.55859	1	11	0	0	0	0	0	0	0	0	0	0	0	1		0	0	1.39595	Male	Private residence/accommodation	I30Z	Thursday	N	0	0	1	0	1	1	I30	Costing 2014-2015	Dandenong	7400000	8600000	41988	41991.6	3	7767.27
3529769	30	3.49	1.45313	0	11	0	0	0	0	0	0	0	0	0	0	0	1		0	0	1.45833	Female	Private residence/accommodation	D63B	Tuesday	N	0	0	1	0	1	1	D63	Costing 2014-2015	Dandenong	4600000	8600000	41995	41996.4	2	1842.85
3530568	30	3.49	2.39844	0	11	0	0	0	0	0	0	0	0	0	0	0	1		0	0	2.41667	Female	Private residence/accommodation	D04Z	Thursday	Y	0	0	1	0	1	1	D04	Costing 2014-2015	Dandenong	7300000	8600000	41996.3	41998.7	2	12135.7
3528107	26	3.49	5.20703	0	11	0	0	0	0	0	0	0	0	0	0	0	1		0	0	5.20833	Female	Private residence/accommodation	J13B	Wednesday	N	0	0	1	0	1	1	J13	Costing 2014-2015	Dandenong	365218	8600000	41992.3	41997.5	5	7551.65
3532579	81	3.49	4.93359	1	11	0	0	0	0	0	0	0	0	0	0	0	1		0	0	2.2826	Male	Private residence/accommodation	X06B	Wednesday	N	0	0	1	0	1	1	X06	Costing 2014-2015	Dandenong	4500000	8600000	41999.5	42004.5	5	5740.08
3522054	28	3.49	0.632813	0	11	0	0	0	0	0	0	0	0	0	0	0	1		0	0	1.96222	Female	Private residence/accommodation	J64B	Thursday	N	0	0	1	0	1	1	J64	Costing 2014-2015	Dandenong	7900000	8600000	41983.8	41984.4	1	796.125
3536938	36	3.49	4.51953	1	11	0	0	0	0	0	0	0	0	0	0	0	1		0	0	4.5	Male	Private residence/accommodation	I12A	Wednesday	Y	0	0	1	1	1	1	I12	Costing 2014-2015	Dandenong	7900000	8600000	42007	42011.5	5	7352.77
3529800	78	3.49	0.296875	1	11	0	0	0	0	0	0	0	0	0	0	0	1		0	0	0.291667	Male	Private residence/accommodation	X06B	Sunday	N	0	0	1	0	1	1	X06	Costing 2014-2015	Dandenong	4600000	8600000	41994.6	41994.9	1	978.533
3521750	70	3.49	5.01953	1	11	0	0	0	0	0	0	0	0	0	0	0	1		0	0	5	Female	Private residence/accommodation	R02C	Monday	N	0	0	1	0	1	1	R02	Costing 2014-2015	Dandenong	747079	8600000	41983.5	41988.5	5	12479.3
3520476	36	3.49	1.30859	1	11	0	0	0	0	0	0	0	0	0	0	0	1		0	0	1.25061	Female	Private residence/accommodation	N62Z	Tuesday	N	0	0	1	0	1	1	N62	Costing 2014-2015	Dandenong	2100000	8600000	41981.4	41982.7	1	1880.58
3523135	51	3.49	5.16797	1	11	0	0	0	0	0	0	0	0	1	0	0	1		0	0	5.16667	Male	Private residence/accommodation	801A	Wednesday	N	0	0	1	1	1	1	801	Costing 2014-2015	Dandenong	4500000	8600000	41985.3	41990.5	5	8438.52
3522849	27	3.49	2.6875	1	11	0	0	0	0	0	0	0	0	0	0	0	1		0	0	1.85047	Female	Private residence/accommodation	O61Z	Sunday	N	0	0	1	0	1	1	O61	Costing 2014-2015	Dandenong	7600000	8600000	41984.7	41987.4	3	4849.55
3531273	28	3.49	6.47266	1	11	0	0	0	0	0	0	0	0	0	0	0	1		0	0	6.45833	Female	Statistical Separation	G12A	Monday	N	0	0	1	1	1	1	G12	Costing 2014-2015	Dandenong	796462	8600000	41996.4	42002.9	6	8696.42
3527742	56	3.49	0.730469	0	11	0	0	0	0	0	0	0	0	0	0	0	1		0	0	1.46347	Male	Private residence/accommodation	X05B	Friday	N	0	0	1	0	1	1	X05	Costing 2014-2015	Dandenong	2400000	8600000	41991.8	41992.5	1	4440.47
3527325	29	3.49	43.5586	1	11	0	0	0	0	0	0	0	0	0	0	0	1		0.801389	1154	11.2694	Male	Private residence/accommodation	I12A	Friday	Y	0	0	1	1	1	1	I12	Costing 2014-2015	Dandenong	7900000	8600000	41991.3	42034.9	43	32821.2
3530616	25	3.49	0.488281	1	11	0	0	0	0	0	0	0	0	0	0	0	1		0	0	0.226032	Male	Private residence/accommodation	X60B	Tuesday	N	0	0	1	0	1	1	X60	Costing 2014-2015	Dandenong	2400000	8600000	41996.3	41996.8	1	1511.57
3525403	20	3.49	2.875	1	11	0	0	0	0	0	0	0	0	0	0	0	1		0	0	1.44494	Female	Private residence/accommodation	O03B	Thursday	N	0	0	1	0	1	1	O03	Costing 2014-2015	Dandenong	7900000	8600000	41988.7	41991.6	3	4922.28
3527176	25	3.49	0.078125	0	11	0	0	0	0	0	0	0	0	0	0	0	1		0	0	0.083333	Female	Private residence/accommodation	O66C	Wednesday	N	0	0	1	0	1	1	O66	Costing 2014-2015	Dandenong	4700000	8600000	41990.9	41991	1	375.189
3532387	48	3.49	0.355469	0	11	0	0	0	0	0	0	0	0	0	0	0	1		0	0	0.375	Female	Private residence/accommodation	D12B	Friday	N	0	0	1	0	1	1	D12	Costing 2014-2015	Dandenong	4000000	8600000	41999.3	41999.7	1	1420.31
3533845	66	3.49	1.91016	0	11	0	0	0	0	0	0	0	0	0	0	0	1		0	0	2.81512	Female	Other acute hosp/ext care/rehab/geri ctr	I68B	Wednesday	N	0	0	1	0	1	1	I68	Costing 2014-2015	Dandenong	7900000	8600000	42002.1	42004	2	3065.85
3535551	23	3.49	0.144531	0	11	0	0	0	0	0	0	0	0	0	0	0	1		0	0	0.298032	Female	Private residence/accommodation	X06B	Wednesday	N	0	0	1	0	1	1	X06	Costing 2014-2015	Dandenong	2400000	8600000	42004.6	42004.8	1	1252.29
3524308	54	3.49	2.78906	1	11	0	0	0	0	0	0	0	0	0	0	0	1		0	0	1.86583	Male	Private residence/accommodation	X06B	Tuesday	N	0	0	1	0	1	1	X06	Costing 2014-2015	Dandenong	7900000	8600000	41986.7	41989.4	3	5851.2
3519945	76	3.49	8.74219	1	11	0	0	0	0	0	0	0	0	1	0	0	1		0	0	4.89137	Female	Private residence/accommodation	J67A	Tuesday	Y	0	0	1	1	1	1	J67	Costing 2014-2015	Dandenong	2300000	8600000	41981	41989.7	9	8918.21
3527878	69	3.49	1.24609	0	11	0	0	0	0	0	0	0	0	0	0	0	1		0	0	1.25	Male	Private residence/accommodation	D60B	Friday	N	0	0	1	0	1	1	D60	Costing 2014-2015	Dandenong	4400000	8600000	41991.5	41992.7	1	2751.24
3530637	28	3.49	4.55469	0	11	0	0	0	0	0	0	0	0	0	0	0	1		0	0	4.58333	Male	Private residence/accommodation	X07A	Saturday	Y	0	0	1	1	1	1	X07	Costing 2014-2015	Dandenong	7900000	8600000	41995.9	42000.5	5	7018.29
3521304	31	3.49	2.00391	1	11	0	0	0	0	0	0	0	0	0	0	0	1		0	0	2	Female	Private residence/accommodation	D63B	Thursday	N	0	0	1	0	1	1	D63	Costing 2014-2015	Dandenong	2200000	8600000	41982.4	41984.4	2	2150.21
3529505	20	3.49	1.97656	0	11	0	0	0	0	0	0	0	0	0	0	0	1		0	0	2	Female	Private residence/accommodation	D63A	Tuesday	N	0	0	1	1	1	1	D63	Costing 2014-2015	Dandenong	2500000	8600000	41994.4	41996.4	2	2176.47
3520668	47	3.49	0.5625	1	11	0	0	0	0	0	0	0	0	0	0	0	1		0	0	0.244285	Female	Private residence/accommodation	N62Z	Tuesday	N	0	0	1	0	1	1	N62	Costing 2014-2015	Dandenong	7900000	8600000	41982	41982.6	1	713.622
3535210	59	3.49	0.824219	0	11	0	0	0	0	0	0	0	0	0	0	0	1		0	0	1.54716	Female	Private residence/accommodation	I30Z	Wednesday	N	0	0	1	0	1	1	I30	Costing 2014-2015	Dandenong	2100000	8600000	42003.9	42004.8	1	3178.29
3524849	32	3.49	0.582031	0	11	0	0	0	0	0	0	0	0	0	0	0	1		0	0	1.02119	Female	Private residence/accommodation	O05Z	Monday	N	0	0	1	0	1	1	O05	Costing 2014-2015	Dandenong	4400000	8600000	41987.8	41988.4	1	2502.82
3528044	63	3.49	1.89844	0	11	0	0	0	0	0	0	0	0	1	0	0	1		0	0	3.51208	Female	Private residence/accommodation	L63A	Saturday	N	0	0	1	1	1	1	L63	Costing 2014-2015	Dandenong	775312	8600000	41991.9	41993.8	2	3163.93
3532622	55	3.49	1.83594	1	11	0	0	0	0	0	0	0	0	0	0	0	1		0	0	1.68168	Male	Left against Medical Advice	I30Z	Sunday	N	0	0	1	0	1	1	I30	Costing 2014-2015	Dandenong	487816	8600000	41999.6	42001.5	2	3615.62
3521476	31	3.49	2.42578	0	11	0	0	0	0	0	0	0	0	0	0	0	1		0	0	2.4696	Female	Private residence/accommodation	J64B	Friday	N	0	0	1	0	1	1	J64	Costing 2014-2015	Dandenong	4300000	8600000	41983.1	41985.5	2	3054.57
3522947	51	3.49	1.15625	0	11	0	0	0	0	0	0	0	0	0	0	0	1		0	0	1.16667	Male	Private residence/accommodation	J08B	Friday	N	0	0	1	0	1	1	J08	Costing 2014-2015	Dandenong	4000000	8600000	41984.3	41985.5	1	3859.44
3535100	58	3.49	9.01953	0	11	0	0	0	0	0	0	0	0	0	0	0	1		0.775694	1117	8.22431	Male	Other acute hosp/ext care/rehab/geri ctr	I12C	Thursday	N	0	0	1	0	1	1	I12	Costing 2014-2015	Dandenong	7800000	8600000	42003.4	42012.4	9	11878.6
3524847	67	3.49	2.69141	0	11	0	0	0	0	0	0	0	0	0	0	0	1		0	0	2.70833	Female	Private residence/accommodation	X06B	Wednesday	Y	0	0	1	0	1	1	X06	Costing 2014-2015	Dandenong	486014	8600000	41987.8	41990.5	3	5429.51
3520790	86	3.49	0.425781	1	11	0	0	0	0	0	0	0	0	1	0	0	1		0	0	0.416667	Female	Private residence/accommodation	J11Z	Tuesday	N	0	0	1	0	1	1	J11	Costing 2014-2015	Dandenong	2400000	8600000	41982.3	41982.7	1	2874.96
3529236	78	3.49	3.75	1	11	0	0	0	0	0	0	0	0	0	0	0	1		0	0	3.09242	Male	Other acute hosp/ext care/rehab/geri ctr	G70A	Wednesday	Y	0	0	1	1	1	1	G70	Costing 2014-2015	Dandenong	7100000	8600000	41993.9	41997.7	4	5066.09
3523993	34	3.49	0.710938	1	11	0	0	0	0	0	0	0	0	0	0	0	1		0	0	0.298032	Female	Private residence/accommodation	X06B	Saturday	N	0	0	1	0	1	1	X06	Costing 2014-2015	Dandenong	4300000	8600000	41986.1	41986.8	1	1646.74
3525669	71	3.49	6.42578	0	11	0	0	0	0	0	0	0	0	0	0	0	1		0	0	26.6834	Male	Other acute hosp/ext care/rehab/geri ctr	G02A	Monday	Y	0	0	1	1	1	1	G02	Costing 2014-2015	Dandenong	2400000	8600000	41989.1	41995.5	6	21263.9
3536231	34	3.49	2.15625	0	11	0	0	0	0	0	0	0	0	0	0	0	1		0	0	2.16667	Female	Private residence/accommodation	Y03Z	Sunday	N	0	0	1	0	1	1	Y03	Costing 2014-2015	Dandenong	7900000	8600000	42006.3	42008.5	2	3572.9
3525451	45	3.49	2.49609	0	11	0	0	0	0	0	0	0	0	0	0	0	1		0	0	2.6377	Male	Private residence/accommodation	Y03Z	Wednesday	N	0	0	1	0	1	1	Y03	Costing 2014-2015	Dandenong	7900000	8600000	41988.3	41990.8	2	4172.85
3529231	45	3.49	0.214844	0	11	0	0	0	0	0	0	0	0	0	0	0	1		0	0	0.243475	Male	Private residence/accommodation	X63B	Sunday	N	0	0	1	0	1	1	X63	Costing 2014-2015	Dandenong	7900000	8600000	41994.2	41994.4	1	324.778
3524851	80	3.49	3.69922	0	11	0	0	0	0	0	0	0	0	0	0	0	1		0	0	3.70833	Male	Private residence/accommodation	X06A	Thursday	Y	0	0	1	1	1	1	X06	Costing 2014-2015	Dandenong	7900000	8600000	41987.8	41991.5	4	5497.44
3529357	51	3.49	0.203125	0	11	0	0	0	0	0	0	0	0	0	0	0	1		0	0	0.208333	Female	Other acute hosp/ext care/rehab/geri ctr	G66A	Sunday	N	0	0	1	1	1	1	G66	Costing 2014-2015	Dandenong	2400000	8600000	41993.9	41994.1	1	1621.03
3525297	51	3.49	2.05859	0	11	0	0	0	0	0	0	0	0	0	0	0	1		0	0	2.08333	Female	Private residence/accommodation	D63B	Wednesday	Y	0	0	1	0	1	1	D63	Costing 2014-2015	Dandenong	4300000	8600000	41988.6	41990.7	2	2391.19
3521734	42	3.49	1.09375	1	11	0	0	0	0	0	0	0	0	0	0	0	1		0	0	1.08333	Female	Private residence/accommodation	B71B	Thursday	N	0	0	1	0	1	1	B71	Costing 2014-2015	Dandenong	435763	8600000	41983.4	41984.5	1	2609.07
3524747	20	3.49	2.41016	0	11	0	0	0	0	0	0	0	0	0	0	0	1		0	0	2.41667	Male	Private residence/accommodation	B05Z	Wednesday	N	0	0	1	0	1	1	B05	Costing 2014-2015	Dandenong	7300000	8600000	41987.9	41990.3	3	5804.74
3524329	33	3.49	3.77344	1	11	0	0	0	0	0	0	0	0	0	0	0	1		0	0	1.376	Female	Private residence/accommodation	X06B	Wednesday	N	0	0	1	0	1	1	X06	Costing 2014-2015	Dandenong	7900000	8600000	41986.7	41990.5	4	4713.81
3528305	34	3.49	1.25391	1	11	0	0	0	0	0	0	0	0	0	0	0	1		0	0	1.25	Male	Private residence/accommodation	I17B	Saturday	N	0	0	1	0	1	1	I17	Costing 2014-2015	Dandenong	2300000	8600000	41992.5	41993.8	1	3926.37
3520695	21	3.49	1.45703	0	11	0	0	0	0	0	0	0	0	0	0	0	1		0	0	1.77177	Female	Private residence/accommodation	G07B	Wednesday	N	0	0	1	0	1	1	G07	Costing 2014-2015	Dandenong	7900000	8600000	41982.1	41983.6	1	4422.69
3519154	22	3.49	1.12109	0	11	0	0	0	0	0	0	0	0	0	0	0	1		0	0	2.69841	Male	Private residence/accommodation	Y03Z	Sunday	N	0	0	1	0	1	1	Y03	Costing 2014-2015	Dandenong	4400000	8600000	41979.3	41980.5	1	3297.32
3525591	25	3.49	1.0625	1	11	0	0	0	0	0	0	0	0	0	0	0	1		0	0	1.04167	Female	Private residence/accommodation	D04Z	Wednesday	N	0	0	1	0	1	1	D04	Costing 2014-2015	Dandenong	2400000	8600000	41989.3	41990.4	1	4471.1
3531327	86	3.49	2.01953	0	11	0	0	0	0	0	0	0	0	0	0	0	1		0	0	2.04167	Female	Private residence/accommodation	J08A	Thursday	Y	0	0	1	1	1	1	J08	Costing 2014-2015	Dandenong	2400000	8600000	41996.5	41998.5	2	6528.86
3532883	52	3.49	2.43359	1	11	0	0	0	0	0	0	0	0	0	0	0	1		0	0	2.41667	Male	Private residence/accommodation	D04Z	Monday	N	0	0	1	0	1	1	D04	Costing 2014-2015	Dandenong	2500000	8600000	42000.1	42002.5	2	5344.94
3519784	50	3.49	1.30078	0	11	0	0	0	0	0	0	0	0	0	0	0	1		0	0	2.73949	Female	Private residence/accommodation	X02A	Monday	N	0	0	1	1	1	1	X02	Costing 2014-2015	Dandenong	207592	8600000	41980.3	41981.6	1	5976.75
3527510	51	3.49	0.910156	0	11	0	0	0	0	0	0	0	0	0	0	0	1		0	0	3.28583	Male	Private residence/accommodation	L67B	Friday	N	0	0	1	0	1	1	L67	Costing 2014-2015	Dandenong	4500000	8600000	41991.5	41992.4	1	1859.11
3535981	25	3.49	0.878906	0	11	0	0	0	0	0	0	0	0	0	0	0	1		0	0	1.44494	Female	Private residence/accommodation	O03B	Friday	N	0	0	1	0	1	1	O03	Costing 2014-2015	Dandenong	4500000	8600000	42005.6	42006.5	1	2640.49
3523876	55	3.49	0.746094	0	11	0	0	0	0	0	0	0	0	0	0	0	1		0	0	1.86583	Male	Private residence/accommodation	X06B	Saturday	N	0	0	1	0	1	1	X06	Costing 2014-2015	Dandenong	4000000	8600000	41985.8	41986.5	1	1705.53
3533887	72	3.49	9.32422	0	11	0	0	0	0	0	0	0	0	0	0	0	1		0	0	9.33333	Female	Other acute hosp/ext care/rehab/geri ctr	Y02A	Wednesday	Y	0	0	1	1	1	1	Y02	Costing 2014-2015	Dandenong	2100000	8600000	42002.3	42011.6	9	13787.5
3520349	25	3.49	0.324219	0	11	0	0	0	0	0	0	0	0	0	0	0	1		0	0	0.333333	Female	Private residence/accommodation	O66C	Monday	N	0	0	1	0	1	1	O66	Costing 2014-2015	Dandenong	4700000	8600000	41981.7	41982	1	549.47
3520662	37	3.49	1.44922	0	11	0	0	0	0	0	0	0	0	0	0	0	1		0	0	5.31927	Female	Private residence/accommodation	J64A	Wednesday	N	0	0	1	1	1	1	J64	Costing 2014-2015	Dandenong	4600000	8600000	41982	41983.4	2	1739.05
3529877	84	3.49	7.51172	1	11	0	0	0	0	0	0	0	0	0	0	0	1		0	0	7.5	Female	Statistical Separation	X07B	Monday	Y	0	0	1	0	1	1	X07	Costing 2014-2015	Dandenong	7900000	8600000	41995.1	42002.6	7	9343.27
3520658	37	3.49	0.585938	0	11	0	0	0	0	0	0	0	0	0	0	0	1		0	0	0.963204	Male	Private residence/accommodation	X60B	Tuesday	N	0	0	1	0	1	1	X60	Costing 2014-2015	Dandenong	4300000	8600000	41982	41982.6	1	1244.77
3522804	36	3.49	1.23828	0	11	0	0	0	0	0	0	0	0	0	0	0	1		0	0	1.25	Female	Private residence/accommodation	J65B	Friday	N	0	0	1	0	1	1	J65	Costing 2014-2015	Dandenong	2300000	8600000	41984.6	41985.8	1	2126.16
3527907	79	3.49	2.01563	1	11	0	0	0	0	0	0	0	0	0	0	0	1		0	0	2	Male	Private residence/accommodation	J64B	Saturday	N	0	0	1	0	1	1	J64	Costing 2014-2015	Dandenong	4400000	8600000	41991.5	41993.5	2	2118.76
3523130	31	3.49	10.6523	0	11	0	0	0	0	0	0	0	0	1	0	0	1		0	0	10.6667	Male	Private residence/accommodation	I12A	Monday	N	0	0	1	1	1	1	I12	Costing 2014-2015	Dandenong	788514	8600000	41985.3	41995.9	10	13661.2
3533331	54	3.49	1.96094	1	11	0	0	0	0	0	0	0	0	0	0	0	1		0	0	1.5655	Female	Private residence/accommodation	I75B	Monday	N	0	0	1	0	1	1	I75	Costing 2014-2015	Dandenong	4400000	8600000	42000.8	42002.7	2	1864.57
3522712	44	3.49	3.89844	0	11	0	0	0	0	0	0	0	0	1	0	0	1		0	0	3.91667	Female	Private residence/accommodation	J64B	Monday	N	0	0	1	0	1	1	J64	Costing 2014-2015	Dandenong	4400000	8600000	41984.5	41988.4	4	5151.64
3526378	46	3.49	30.2031	1	11	0	0	0	0	0	0	0	0	0	0	0	1		0	0	30.1667	Male	Private residence/accommodation	A06A	Friday	Y	0	0	1	1	1	1	A06	Costing 2014-2015	Dandenong	4600000	8600000	41990.3	42020.5	30	64088
3524476	20	3.49	3.30859	1	11	0	0	0	0	0	0	0	0	0	0	0	1		0	0	2.64639	Male	Private residence/accommodation	G07A	Tuesday	N	0	0	1	1	1	1	G07	Costing 2014-2015	Dandenong	2500000	8600000	41986.2	41989.5	3	5518.09
3526942	20	3.49	0.660156	0	11	0	0	0	0	0	0	0	0	0	0	0	1		0	0	0.666667	Male	Private residence/accommodation	C01Z	Thursday	N	0	0	1	0	1	1	C01	Costing 2014-2015	Dandenong	2500000	8600000	41990.8	41991.4	1	12316.5
3527061	67	3.49	2.07031	0	11	0	0	0	0	0	0	0	0	0	0	0	1		0	0	2.08333	Female	Private residence/accommodation	N04B	Friday	N	0	0	1	0	1	1	N04	Costing 2014-2015	Dandenong	4600000	8600000	41990.5	41992.5	2	5727.54
3533724	34	3.49	1.02344	0	11	0	0	0	0	0	0	0	0	0	0	0	1		0	0	1.74533	Male	Private residence/accommodation	I27B	Monday	N	0	0	1	0	1	1	I27	Costing 2014-2015	Dandenong	4300000	8600000	42001.7	42002.7	1	2841.86
3523860	44	3.49	1.76563	0	11	0	0	0	0	0	0	0	0	0	0	0	1		0	0	3.6535	Male	Private residence/accommodation	X06A	Sunday	N	0	0	1	1	1	1	X06	Costing 2014-2015	Dandenong	7100000	8600000	41985.7	41987.5	2	2810.55
3529965	62	3.49	0.207031	0	11	0	0	0	0	0	0	0	0	0	0	0	1		0	0	0.208333	Male	Private residence/accommodation	I81Z	Monday	N	0	0	1	0	1	1	I81	Costing 2014-2015	Dandenong	7900000	8600000	41995.3	41995.6	1	615.002
3535889	36	3.49	0.210938	1	11	0	0	0	0	0	0	0	0	0	0	0	1		0	0	0.208333	Male	Private residence/accommodation	Y03Z	Thursday	N	0	0	1	0	1	1	Y03	Costing 2014-2015	Dandenong	4600000	8600000	42005.3	42005.5	1	1698.02
3536661	45	3.49	2.86328	1	11	0	0	0	0	0	0	0	0	0	0	0	1		0	0	1.85736	Female	Private residence/accommodation	I30Z	Monday	N	0	0	1	0	1	1	I30	Costing 2014-2015	Dandenong	4600000	8600000	42006.6	42009.5	3	4983.35
3534005	39	3.49	0.433594	1	11	0	0	0	0	0	0	0	0	0	0	0	1		0	0	0.298497	Male	Private residence/accommodation	I30Z	Monday	N	0	0	1	0	1	1	I30	Costing 2014-2015	Dandenong	7900000	8600000	42002.5	42002.9	1	1727.69
3528128	88	3.49	5.13281	0	11	0	0	0	0	0	0	0	0	0	0	0	1		0	0	5.16667	Female	Private residence/accommodation	J13B	Wednesday	Y	0	0	1	0	1	1	J13	Costing 2014-2015	Dandenong	298364	8600000	41992.3	41997.5	5	5969.68
3519242	33	3.49	1.16406	0	11	0	0	0	0	0	0	0	0	0	0	0	1		0	0	2.67727	Female	Private residence/accommodation	O05Z	Sunday	N	0	0	1	0	1	1	O05	Costing 2014-2015	Dandenong	4300000	8600000	41979.2	41980.3	1	2843.4
3519660	48	3.49	3.95313	1	11	0	0	0	0	0	0	0	0	0	0	0	1		0	0	1.61403	Male	Private residence/accommodation	X06B	Thursday	N	0	0	1	0	1	1	X06	Costing 2014-2015	Dandenong	4200000	8600000	41980.5	41984.4	4	5121.04
3531826	19	3.49	0.617188	0	11	0	0	0	0	0	0	0	0	0	0	0	1		0	0	1.37049	Male	Private residence/accommodation	I30Z	Thursday	N	0	0	1	0	1	1	I30	Costing 2014-2015	Dandenong	7900000	8600000	41997.7	41998.4	1	3922.7
3522837	81	3.49	4.83984	1	11	0	0	0	0	0	0	0	0	0	0	0	1		0	0	4.83333	Female	Private residence/accommodation	N11Z	Monday	Y	0	0	1	0	1	1	N11	Costing 2014-2015	Dandenong	4300000	8600000	41983.8	41988.7	5	18251.7
3519735	36	3.49	3.91797	0	11	0	0	0	0	0	0	0	0	1	0	0	1		0	0	6.49625	Female	Private residence/accommodation	H08A	Thursday	N	0	0	1	1	1	1	H08	Costing 2014-2015	Dandenong	7100000	8600000	41980.7	41984.7	4	7932.67
3530466	69	3.49	17.0352	0	11	0	0	0	0	0	0	0	0	0	0	0	1		0	0	17.0417	Male	Private residence/accommodation	A06C	Thursday	Y	0	0	1	0	1	1	A06	Costing 2014-2015	Dandenong	4400000	8600000	41995.3	42012.3	17	54273
3536886	36	3.49	26.8555	1	11	0	0	0	0	0	0	0	0	1	0	0	1		21.0764	30350	1.79625	Male	Private residence/accommodation	X06B	Thursday	N	0	0	1	0	1	1	X06	Costing 2014-2015	Dandenong	4500000	8600000	42006.8	42033.6	15	12619.6
3532699	31	3.49	2.79297	1	11	0	0	0	0	0	0	0	0	0	0	0	1		0	0	2.79167	Female	Private residence/accommodation	D63B	Monday	N	0	0	1	0	1	1	D63	Costing 2014-2015	Dandenong	7400000	8600000	41999.7	42002.5	3	5800.24
3524713	67	3.49	12.2266	0	11	0	0	0	0	0	0	0	0	0	0	0	1		0	0	12.25	Female	Private residence/accommodation	A06A	Saturday	Y	0	0	1	1	1	1	A06	Costing 2014-2015	Dandenong	331352	8600000	41988.3	42000.5	12	50454.3
3532511	66	3.49	1.01563	0	11	0	0	0	0	0	0	0	0	0	0	0	1		0	0	2.10521	Male	Private residence/accommodation	X06B	Saturday	N	0	0	1	0	1	1	X06	Costing 2014-2015	Dandenong	7900000	8600000	41999.5	42000.5	1	2239.05
3533114	52	3.49	0.917969	1	11	0	0	0	0	0	0	0	0	0	0	0	1		0	0	0.916667	Male	Private residence/accommodation	X06A	Sunday	N	0	0	1	1	1	1	X06	Costing 2014-2015	Dandenong	4700000	8600000	42000.5	42001.5	1	1901.83
3519581	23	3.49	1.51172	1	11	0	0	0	0	0	0	0	0	0	0	0	1		0	0	1.5	Male	Private residence/accommodation	D63B	Monday	N	0	0	1	0	1	1	D63	Costing 2014-2015	Dandenong	7900000	8600000	41979.9	41981.5	2	1789.37
3536446	68	3.49	7.93359	0	11	0	0	0	0	0	0	0	0	0	0	0	1		0	0	7.95833	Male	Private residence/accommodation	Y02A	Saturday	Y	0	0	1	1	1	1	Y02	Costing 2014-2015	Dandenong	7900000	8600000	42006.5	42014.4	8	9932.69
3533461	82	3.49	14.9961	1	11	0	0	0	3	0	0	1	4	1	0	0	1		0	0	5.08935	Female	Private residence/accommodation	G61A	Monday	N	1	0	1	1	1	1	G61	Costing 2014-2015	Dandenong	2200000	8600000	42001.5	42016.5	15	25372.7
3527093	63	3.49	1.88281	1	11	0	0	0	0	0	0	0	0	0	0	0	1		0	0	1.875	Male	Private residence/accommodation	J64B	Friday	N	0	0	1	0	1	1	J64	Costing 2014-2015	Dandenong	7900000	8600000	41990.5	41992.4	2	3679.58
3533997	85	3.49	1.23828	0	11	0	0	0	0	0	0	0	0	0	0	0	1		0	0	1.25	Male	Private residence/accommodation	D62A	Tuesday	N	0	0	1	1	1	1	D62	Costing 2014-2015	Dandenong	2200000	8600000	42002.4	42003.6	1	1774.64
3533065	37	3.49	6.98438	1	11	0	0	0	0	0	0	0	0	0	0	0	1		0	0	3.54452	Male	Private residence/accommodation	X05A	Saturday	Y	0	0	1	1	1	1	X05	Costing 2014-2015	Dandenong	2400000	8600000	42000.5	42007.5	7	11823.2
3529124	28	3.49	0.222656	0	11	0	0	0	0	0	0	0	0	1	0	0	1		0	0	0.331406	Male	Private residence/accommodation	I30Z	Saturday	N	0	0	1	0	1	1	I30	Costing 2014-2015	Dandenong	7900000	8600000	41993.6	41993.8	1	1984.34
3531282	90	3.49	10.9023	0	11	0	0	0	0	0	0	0	0	0	0	0	1		0	0	10.9167	Female	Aged care residential facility	C60B	Wednesday	N	0	0	1	0	1	1	C60	Costing 2014-2015	Dandenong	2100000	8600000	41993.7	42004.6	11	12478.1
3536043	66	3.49	16.0313	0	11	0	0	0	0	0	0	0	0	0	0	0	1		0	0	16.0417	Female	Other acute hosp/ext care/rehab/geri ctr	G70A	Saturday	Y	0	0	1	1	1	1	G70	Costing 2014-2015	Dandenong	4100000	8600000	42005.5	42021.6	16	20012.5
3525008	50	3.49	1.06641	0	11	0	0	0	0	0	0	0	0	0	0	0	1		0	0	1.08333	Male	Private residence/accommodation	D04Z	Tuesday	N	0	0	1	0	1	1	D04	Costing 2014-2015	Dandenong	4100000	8600000	41988.4	41989.5	1	6712.73
3536352	58	3.49	2.05078	1	11	0	0	0	0	0	0	0	0	0	0	0	1		0	0	2.04167	Female	Private residence/accommodation	D14A	Sunday	N	0	0	1	1	1	1	D14	Costing 2014-2015	Dandenong	2400000	8600000	42006.4	42008.5	2	3705.58
3527311	57	3.49	1.20313	0	11	0	0	0	0	0	0	0	0	0	0	0	1		0	0	1.20833	Female	Private residence/accommodation	N04A	Friday	N	0	0	1	1	1	1	N04	Costing 2014-2015	Dandenong	2400000	8600000	41991.3	41992.5	1	6609.02
3522959	62	3.49	0.65625	0	11	0	0	0	0	0	0	0	0	0	0	0	1		0	0	0.666667	Male	Private residence/accommodation	X02B	Thursday	N	0	0	1	0	1	1	X02	Costing 2014-2015	Dandenong	707187	8600000	41984.3	41985	1	1964.42
3532035	70	3.49	21.0898	0	11	0	0	0	0	0	0	0	0	0	0	0	1		0	0	21.125	Female	Private residence/accommodation	J08A	Wednesday	Y	0	0	1	1	1	1	J08	Costing 2014-2015	Dandenong	4000000	8600000	41997.6	42018.7	21	27906.1
3521745	72	3.49	1.99219	0	11	0	0	0	0	0	0	0	0	0	0	0	1		0	0	2	Male	Private residence/accommodation	D12B	Friday	N	0	0	1	0	1	1	D12	Costing 2014-2015	Dandenong	2200000	8600000	41983.5	41985.5	2	3879.63
3519888	53	3.49	7.15234	1	11	0	0	0	0	0	0	0	0	0	0	0	1		0	0	7.125	Male	Private residence/accommodation	D02A	Monday	Y	0	0	1	1	1	1	D02	Costing 2014-2015	Dandenong	375603	8600000	41981.3	41988.4	7	31295.7
3525600	37	3.49	13.5078	0	11	0	0	0	1	0	0	0	1	0	0	0	1		6.3125	9090	7.22917	Female	Private residence/accommodation	J14Z	Monday	Y	1	0	1	0	1	1	J14	Costing 2014-2015	Dandenong	4000000	8600000	41989.3	42002.8	13	44177.6
3535057	37	3.49	3.67188	1	11	0	0	0	0	0	0	0	0	0	0	0	1		0	0	1.80228	Male	Private residence/accommodation	G70B	Saturday	Y	0	0	1	0	1	1	G70	Costing 2014-2015	Dandenong	7100000	8600000	42003.8	42007.5	4	5021.88
3532380	35	3.49	1.27344	0	11	0	0	0	0	0	0	0	0	0	0	0	1		0	0	1.81962	Female	Private residence/accommodation	X63B	Saturday	N	0	0	1	0	1	1	X63	Costing 2014-2015	Dandenong	2500000	8600000	41999.1	42000.4	1	1894.78
3527174	49	3.49	2.75781	1	11	0	0	0	0	0	0	0	0	0	0	0	1		0	0	1.79625	Female	Private residence/accommodation	X06B	Saturday	N	0	0	1	0	1	1	X06	Costing 2014-2015	Dandenong	324714	8600000	41990.9	41993.6	3	3527.55
3521215	19	3.49	2.08594	1	11	0	0	0	0	0	0	0	0	0	0	0	1		0	0	2.08333	Male	Private residence/accommodation	D04Z	Thursday	Y	0	0	1	0	1	1	D04	Costing 2014-2015	Dandenong	4600000	8600000	41982.3	41984.4	2	10841.9
3533105	25	3.49	0.105469	0	11	0	0	0	0	0	0	0	0	0	0	0	1		0	0	0.364606	Male	Private residence/accommodation	B07B	Saturday	N	0	0	1	0	1	1	B07	Costing 2014-2015	Dandenong	7900000	8600000	42000.5	42000.7	1	1311.09
3530074	34	3.49	1	0	11	0	0	0	0	0	0	0	0	0	0	0	1		0	0	1.44494	Female	Private residence/accommodation	O03B	Tuesday	N	0	0	1	0	1	1	O03	Costing 2014-2015	Dandenong	7200000	8600000	41995.4	41996.4	1	4064.06
3519416	33	3.49	0.066406	0	11	0	0	0	0	0	0	0	0	0	0	0	1		0	0	0.228909	Female	Private residence/accommodation	O03B	Saturday	N	0	0	1	0	1	1	O03	Costing 2014-2015	Dandenong	7300000	8600000	41979.7	41979.7	1	404.399
3525874	46	3.49	1.29297	1	11	0	0	0	0	0	0	0	0	0	0	0	1		0	0	0.191759	Female	Private residence/accommodation	O66B	Wednesday	N	0	0	1	0	1	1	O66	Costing 2014-2015	Dandenong	2500000	8600000	41989.4	41990.7	1	1669.02
3523602	51	3.49	5.02344	0	11	0	0	0	0	0	0	0	0	0	0	0	1		0	0	5.04167	Female	Private residence/accommodation	N61Z	Wednesday	Y	0	0	1	0	1	1	N61	Costing 2014-2015	Dandenong	4400000	8600000	41985.6	41990.6	5	6629.61
3535044	65	3.49	0.875	0	11	0	0	0	0	0	0	0	0	0	0	0	1		0	0	0.875	Male	Private residence/accommodation	I27B	Wednesday	N	0	0	1	0	1	1	I27	Costing 2014-2015	Dandenong	340187	8600000	42003.8	42004.6	1	2533.57
3540016	70	3.64	3.11719	0	12	0	0	0	1	0	0	0	1	0	0	0	1		0	0	3.125	Male	Private residence/accommodation	J08A	Sunday	Y	1	0	1	1	1	1	J08	Costing 2014-2015	Dandenong	2400000	8600000	42012.3	42015.5	3	8114.73
3546215	23	3.64	0.367188	1	12	0	0	0	0	0	0	0	0	0	0	0	1		0	0	0.254227	Male	Private residence/accommodation	X05B	Saturday	N	0	0	1	0	1	1	X05	Costing 2014-2015	Dandenong	7900000	8600000	42021.4	42021.8	1	1226.73
3536989	41	3.64	0.375	0	12	0	0	0	0	0	0	0	0	0	0	0	1		0	0	0.375	Male	Private residence/accommodation	I81Z	Saturday	N	0	0	1	0	1	1	I81	Costing 2014-2015	Dandenong	2100000	8600000	42007.4	42007.8	1	442.612
3546117	90	3.64	7.53906	0	12	0	0	0	0	0	0	0	0	0	0	0	1		0	0	7.54167	Female	Other acute hosp/ext care/rehab/geri ctr	J13B	Saturday	Y	0	0	1	0	1	1	J13	Costing 2014-2015	Dandenong	7100000	8600000	42020.9	42028.5	8	9957.31
3551802	24	3.64	0.929688	0	12	0	0	0	0	0	0	0	0	0	0	0	1		0	0	0.958333	Female	Private residence/accommodation	D04Z	Tuesday	N	0	0	1	0	1	1	D04	Costing 2014-2015	Dandenong	4600000	8700000	42030.5	42031.4	1	3418.09
3547653	23	3.64	1.29688	1	12	0	0	0	0	0	0	0	0	0	0	0	1		0	0	1.03809	Male	Private residence/accommodation	X60B	Wednesday	N	0	0	1	0	1	1	X60	Costing 2014-2015	Dandenong	2400000	8600000	42024.1	42025.4	1	1386.94
3556699	45	3.64	8.19922	0	12	0	0	0	0	0	0	0	0	0	0	0	1		0	0	8.20833	Female	Private residence/accommodation	N12A	Tuesday	Y	0	0	1	1	1	1	N12	Costing 2014-2015	Dandenong	7900000	8700000	42037.3	42045.5	8	21118
3546036	26	3.64	2.46875	1	12	0	0	0	0	0	0	0	0	0	0	0	1		0	0	2.45833	Female	Private residence/accommodation	X06B	Monday	N	0	0	1	0	1	1	X06	Costing 2014-2015	Dandenong	460212	8600000	42021	42023.5	2	2918.63
3547564	61	3.64	31.043	1	12	0	0	0	0	0	0	1	1	0	0	0	1		0	0	31.0417	Female	Private residence/accommodation	A06A	Thursday	Y	1	0	1	1	1	1	A06	Costing 2014-2015	Dandenong	826737	8600000	42023.6	42054.7	31	124953
3539305	68	3.64	6.0625	0	12	0	0	0	0	0	0	0	0	0	0	0	1		0.667361	961	5.41597	Female	Other acute hosp/ext care/rehab/geri ctr	I12B	Tuesday	N	0	0	1	0	1	1	I12	Costing 2014-2015	Dandenong	284812	8600000	42011.4	42017.5	6	8443.51
3540565	46	3.64	2.33984	1	12	0	0	0	0	0	0	0	0	0	0	0	1		0	0	2.33333	Female	Private residence/accommodation	X06A	Saturday	N	0	0	1	1	1	1	X06	Costing 2014-2015	Dandenong	4100000	8600000	42012.5	42014.9	2	3851.72
3546840	69	3.64	9.48438	0	12	0	0	0	0	0	0	0	0	0	0	0	1		0	0	9.5	Male	Private residence/accommodation	J08A	Wednesday	Y	0	0	1	1	1	1	J08	Costing 2014-2015	Dandenong	7800000	8600000	42023.3	42032.8	9	11843.8
3554268	46	3.64	6.36719	0	12	0	0	0	0	0	0	0	0	0	0	0	1		0	0	6.375	Female	Private residence/accommodation	J14Z	Wednesday	Y	0	0	1	0	1	1	J14	Costing 2014-2015	Dandenong	7300000	8700000	42033.3	42039.7	6	19625.3
3548689	65	3.64	2.00391	1	12	0	0	0	0	0	0	0	0	0	0	0	1		0	0	2	Female	Private residence/accommodation	N04B	Friday	N	0	0	1	0	1	1	N04	Costing 2014-2015	Dandenong	4400000	8600000	42025.5	42027.5	2	5457.26
3551513	23	3.64	7.88281	1	12	0	0	0	0	0	0	0	0	0	0	0	1		0	0	6.02364	Male	Private residence/accommodation	J08A	Monday	N	0	0	1	1	1	1	J08	Costing 2014-2015	Dandenong	7900000	8700000	42029.7	42037.6	8	8421.68
3546787	54	3.64	0.851563	0	12	0	0	0	0	0	0	0	0	0	0	0	1		0	0	0.875	Male	Private residence/accommodation	D12B	Monday	N	0	0	1	0	1	1	D12	Costing 2014-2015	Dandenong	7100000	8600000	42022.7	42023.5	1	2565.23
3556837	32	3.64	2.9375	0	12	0	0	0	0	0	0	0	0	0	0	0	1		0	0	2.95833	Male	Private residence/accommodation	J08A	Thursday	N	0	0	1	1	1	1	J08	Costing 2014-2015	Dandenong	7100000	8700000	42037.6	42040.5	3	4097.9
3541065	35	3.64	0.363281	0	12	0	0	0	0	0	0	0	0	0	0	0	1		0	0	0.375	Male	Private residence/accommodation	G70C	Friday	N	0	0	1	0	1	1	G70	Costing 2014-2015	Dandenong	2100000	8600000	42013.6	42014	1	1224.99
3544367	76	3.64	5.14063	1	12	0	0	0	0	0	0	0	0	0	0	0	1		0	0	5.125	Female	Private residence/accommodation	Y02C	Monday	N	0	0	1	0	1	1	Y02	Costing 2014-2015	Dandenong	7900000	8600000	42018.5	42023.6	5	6996.27
3548317	21	3.64	1.76563	1	12	0	0	0	0	0	0	0	0	0	0	0	1		0	0	1.75	Female	Private residence/accommodation	J64B	Thursday	N	0	0	1	0	1	1	J64	Costing 2014-2015	Dandenong	7900000	8600000	42024.6	42026.4	2	2486.45
3541761	79	3.64	2.67578	0	12	0	0	0	0	0	0	0	0	0	0	0	1		0	0	2.70833	Male	Private residence/accommodation	I75A	Tuesday	N	0	0	1	1	1	1	I75	Costing 2014-2015	Dandenong	4100000	8600000	42014.7	42017.4	3	3017.54
3538434	86	3.64	2.72656	0	12	0	0	0	0	0	0	0	0	0	0	0	1		0	0	3.65629	Male	Private residence/accommodation	G61B	Thursday	N	0	0	1	0	1	1	G61	Costing 2014-2015	Dandenong	2100000	8600000	42010.1	42012.8	2	2605.96
3538365	53	3.64	1.41406	0	12	0	0	0	0	0	0	0	0	0	0	0	1		0	0	1.41667	Female	Private residence/accommodation	I17B	Wednesday	N	0	0	1	0	1	1	I17	Costing 2014-2015	Dandenong	7900000	8600000	42010.3	42011.7	1	5248.64
3539032	29	3.64	4.16016	0	12	0	0	0	0	0	0	0	0	0	0	0	1		0	0	4.16667	Male	Private residence/accommodation	I12B	Saturday	N	0	0	1	0	1	1	I12	Costing 2014-2015	Dandenong	7200000	8600000	42010.6	42014.8	4	6856.69
3552295	18	3.64	0.515625	0	12	0	0	0	0	0	0	0	0	0	0	0	1		0	0	0.541667	Female	Private residence/accommodation	D12B	Tuesday	N	0	0	1	0	1	1	D12	Costing 2014-2015	Dandenong	4400000	8700000	42031.4	42031.9	1	1795
3547650	80	3.64	9.5	0	12	0	0	1	0	0	0	0	1	0	0	0	1		0	0	17.1711	Male	Statistical Separation	G04A	Thursday	Y	1	0	1	1	1	1	G04	Costing 2014-2015	Dandenong	2400000	8600000	42024.1	42033.6	9	17474
3539525	18	3.64	2.21484	1	12	0	0	0	0	0	0	0	0	0	0	0	1		0	0	2.20833	Male	Statistical Separation	I30Z	Friday	Y	0	0	1	0	1	1	I30	Costing 2014-2015	Dandenong	4200000	8600000	42011.6	42013.8	2	7013.33
3555381	17	3.64	0.46875	1	12	0	0	0	0	0	0	0	0	0	0	0	1		0	0	0.341572	Male	Private residence/accommodation	I30Z	Saturday	N	0	0	1	0	1	1	I30	Costing 2014-2015	Dandenong	4400000	8700000	42035.4	42035.8	1	1988.4
3559567	51	3.64	3.23047	0	12	0	0	0	0	0	0	0	0	0	0	0	1		0	0	3.25	Female	Private residence/accommodation	N10Z	Monday	Y	0	0	1	0	1	1	N10	Costing 2014-2015	Dandenong	2500000	8700000	42041.5	42044.7	3	10644.7
3537487	31	3.64	6.16406	0	12	0	0	0	0	0	0	0	0	0	0	0	1		0	0	6.16667	Female	Private residence/accommodation	D63B	Saturday	N	0	0	1	0	1	1	D63	Costing 2014-2015	Dandenong	7900000	8600000	42008.5	42014.6	6	5856.07
3549051	22	3.64	1.27344	0	12	0	0	0	0	0	0	0	0	0	0	0	1		0	0	1.29167	Male	Private residence/accommodation	I17B	Thursday	N	0	0	1	0	1	1	I17	Costing 2014-2015	Dandenong	723496	8600000	42025.4	42026.7	1	6290.4
3553551	33	3.64	0.355469	0	12	0	0	0	0	0	0	0	0	0	0	0	1		0	0	0.375	Male	Private residence/accommodation	D12B	Wednesday	N	0	0	1	0	1	1	D12	Costing 2014-2015	Dandenong	2200000	8700000	42032.5	42032.8	1	1821.61
3538356	45	3.64	2.25391	1	12	0	0	0	1	0	0	0	1	0	0	0	1		0	0	2.25	Male	Private residence/accommodation	R03B	Thursday	N	1	0	1	0	1	1	R03	Costing 2014-2015	Dandenong	7600000	8600000	42010.3	42012.5	2	8229.61
3549489	68	3.64	2.11328	0	12	0	0	0	0	0	0	0	0	0	0	0	1		0	0	5.83767	Male	Private residence/accommodation	J08B	Saturday	N	0	0	1	0	1	1	J08	Costing 2014-2015	Dandenong	7200000	8600000	42026.4	42028.5	2	3035.12
3538441	52	3.64	9.45703	1	12	0	0	0	0	0	0	0	0	0	0	0	1		0	0	4.90143	Female	Private residence/accommodation	E65B	Thursday	Y	0	0	1	0	1	1	E65	Costing 2014-2015	Dandenong	7900000	8600000	42010.2	42019.7	9	8204.69
3549715	38	3.64	1.08984	1	12	0	0	0	0	0	0	0	0	0	0	0	1		0	0	1.08333	Male	Statistical Separation	B07A	Friday	N	0	0	1	1	1	1	B07	Costing 2014-2015	Dandenong	4700000	8600000	42026.5	42027.6	1	3966.51
3539605	20	3.64	0.839844	0	12	0	0	0	0	0	0	0	0	1	0	0	1		0	0	1.37049	Male	Private residence/accommodation	I30Z	Thursday	N	0	0	1	0	1	1	I30	Costing 2014-2015	Dandenong	2400000	8600000	42011.7	42012.6	1	3571.14
3539358	90	3.64	5.30469	1	12	0	0	0	0	0	0	0	0	0	0	0	1		0	0	5.29167	Male	Private residence/accommodation	J08A	Monday	N	0	0	1	1	1	1	J08	Costing 2014-2015	Dandenong	7000000	8600000	42011.5	42016.8	5	7537.82
3541934	68	3.64	11.9961	0	12	0	0	0	0	0	0	0	0	0	0	0	1		0	0	51.8273	Female	Other acute hosp/ext care/rehab/geri ctr	A06A	Friday	Y	0	0	1	1	1	1	A06	Costing 2014-2015	Dandenong	2200000	8600000	42015.3	42027.3	12	27927.6
3539094	53	3.64	2.26563	1	12	0	0	0	0	0	0	0	0	0	0	0	1		0	0	2.25	Female	Private residence/accommodation	K05B	Friday	N	0	0	1	0	1	1	K05	Costing 2014-2015	Dandenong	890679	8600000	42011.3	42013.6	2	8259.13
3536806	44	3.64	3.25	0	12	0	0	0	0	0	0	0	0	0	0	0	1		0	0	3.32157	Male	Private residence/accommodation	J08A	Tuesday	N	0	0	1	1	1	1	J08	Costing 2014-2015	Dandenong	438104	8600000	42007.1	42010.4	3	6146.73
3551466	34	3.64	1.05859	0	12	0	0	0	0	0	0	0	0	0	0	0	1		0	0	1.41771	Female	Private residence/accommodation	X02B	Monday	N	0	0	1	0	1	1	X02	Costing 2014-2015	Dandenong	7000000	8700000	42029.6	42030.7	1	2292.75
3551151	31	3.64	0.382813	1	12	0	0	0	0	0	0	0	0	0	0	0	1		0	0	0.282989	Male	Private residence/accommodation	X05B	Saturday	N	0	0	1	0	1	1	X05	Costing 2014-2015	Dandenong	4200000	8700000	42028.6	42029	1	2090.41
3547450	52	3.64	1.84766	0	12	0	0	0	0	0	0	0	0	0	0	0	1		0	0	4.34092	Female	Private residence/accommodation	F75B	Wednesday	N	0	0	1	0	1	1	F75	Costing 2014-2015	Dandenong	217984	8600000	42023.8	42025.7	2	2320.18
3543857	33	3.64	1.14453	0	12	0	0	0	0	0	0	0	0	0	0	0	1		0	0	1.37875	Male	Private residence/accommodation	J64B	Thursday	N	0	0	1	0	1	1	J64	Costing 2014-2015	Dandenong	4100000	8600000	42018.3	42019.5	1	1481.1
3547397	49	3.64	0.796875	0	12	0	0	0	0	0	0	0	0	0	0	0	1		0	0	1.81962	Female	Private residence/accommodation	X63B	Tuesday	N	0	0	1	0	1	1	X63	Costing 2014-2015	Dandenong	7900000	8600000	42023.7	42024.5	1	1356.16
3551490	66	3.64	1.06641	0	12	0	0	0	0	0	0	0	0	0	0	0	1		0	0	1.08333	Male	Private residence/accommodation	I30Z	Monday	N	0	0	1	0	1	1	I30	Costing 2014-2015	Dandenong	2400000	8700000	42029.6	42030.7	1	1945.14
3554103	78	3.64	0.210938	1	12	0	0	0	0	0	0	0	0	0	0	0	1		0	0	0.208333	Female	Other acute hosp/ext care/rehab/geri ctr	I81Z	Thursday	N	0	0	1	0	1	1	I81	Costing 2014-2015	Dandenong	292758	8700000	42033.6	42033.8	1	283.188
3546483	20	3.64	0.875	1	12	0	0	0	0	0	0	0	0	0	0	0	1		0	0	0.254227	Male	Private residence/accommodation	X05B	Sunday	N	0	0	1	0	1	1	X05	Costing 2014-2015	Dandenong	4100000	8600000	42022	42022.9	1	1488.33
3546938	59	3.64	0.753906	0	12	0	0	0	0	0	0	0	0	0	0	0	1		0	0	1.86583	Male	Private residence/accommodation	X06B	Monday	N	0	0	1	0	1	1	X06	Costing 2014-2015	Dandenong	7900000	8600000	42022.9	42023.7	1	1792.52
3537018	40	3.64	0.152344	1	12	0	0	0	0	0	0	0	0	0	0	0	1		0	0	0.125	Male	Private residence/accommodation	I81Z	Saturday	N	0	0	1	0	1	1	I81	Costing 2014-2015	Dandenong	2200000	8600000	42007.5	42007.7	1	281.676
3548703	40	3.64	0.871094	0	12	0	0	0	0	0	0	0	0	0	0	0	1		0	0	1.65153	Female	Private residence/accommodation	O03B	Thursday	N	0	0	1	0	1	1	O03	Costing 2014-2015	Dandenong	2400000	8600000	42025.5	42026.3	1	3275.88
3546559	44	3.64	2.85938	1	12	0	0	0	0	0	0	0	0	0	0	0	1		0	0	1.25061	Female	Private residence/accommodation	N62Z	Tuesday	N	0	0	1	0	1	1	N62	Costing 2014-2015	Dandenong	4500000	8600000	42021.8	42024.7	3	4511.24
3555992	69	3.64	18.9727	1	12	0	0	0	0	0	0	0	0	0	0	0	1		0	0	18.9583	Male	Other acute hosp/ext care/rehab/geri ctr	A06A	Friday	Y	0	0	1	1	1	1	A06	Costing 2014-2015	Dandenong	2100000	8700000	42036.7	42055.7	19	52637.6
3541877	46	3.64	5.99219	0	12	0	0	0	0	0	0	0	0	0	0	0	1		0	0	9.18249	Female	Private residence/accommodation	G48A	Friday	Y	0	0	1	1	1	1	G48	Costing 2014-2015	Dandenong	2100000	8600000	42014.8	42020.8	6	8267.38
3542202	53	3.64	2.51172	1	12	0	0	0	0	0	0	0	0	0	0	0	1		0	0	1.82852	Male	Private residence/accommodation	J64B	Wednesday	Y	0	0	1	0	1	1	J64	Costing 2014-2015	Dandenong	7800000	8600000	42016	42018.5	2	2890.08
3541777	62	3.64	1.64844	0	12	0	0	0	0	0	0	0	0	0	0	0	1		0	0	2.26117	Male	Private residence/accommodation	D64Z	Monday	N	0	0	1	0	1	1	D64	Costing 2014-2015	Dandenong	7900000	8600000	42014.9	42016.5	2	1709.06
3543742	23	3.64	29.6289	1	12	0	0	0	0	0	0	0	0	0	0	0	1		0.178472	257	8.25373	Female	Private residence/accommodation	O01A	Thursday	Y	0	0	1	1	1	1	O01	Costing 2014-2015	Dandenong	7800000	8600000	42017.8	42047.5	20	28243.8
3539257	51	3.64	1.08594	0	12	0	0	0	0	0	0	0	0	0	0	0	1		0	0	1.82852	Male	Private residence/accommodation	J64B	Thursday	N	0	0	1	0	1	1	J64	Costing 2014-2015	Dandenong	2100000	8600000	42011.6	42012.6	1	1508.28
3539097	42	3.64	2.42188	1	12	0	0	0	0	0	0	0	0	0	0	0	1		0	0	2.41667	Female	Private residence/accommodation	K06B	Friday	N	0	0	1	0	1	1	K06	Costing 2014-2015	Dandenong	387010	8600000	42011.3	42013.7	2	8504.8
3558573	64	3.64	5.35547	0	12	0	0	0	0	0	0	0	0	0	0	0	1		0	0	5.375	Male	Private residence/accommodation	J08A	Tuesday	N	0	0	1	1	1	1	J08	Costing 2014-2015	Dandenong	7900000	8700000	42040.3	42045.6	5	10610.6
3541810	75	3.64	1.61328	0	12	0	0	0	0	0	0	0	0	0	0	0	1		0	0	1.625	Male	Private residence/accommodation	X06B	Monday	N	0	0	1	0	1	1	X06	Costing 2014-2015	Dandenong	4200000	8600000	42014.9	42016.5	2	3543.17
3543404	23	3.64	1.78906	1	12	0	0	0	0	0	0	0	0	0	0	0	1		0	0	1.77177	Female	Private residence/accommodation	G07B	Thursday	N	0	0	1	0	1	1	G07	Costing 2014-2015	Dandenong	7900000	8600000	42017.6	42019.4	2	4152.54
3557911	33	3.64	3.02344	1	12	0	0	0	0	0	0	0	0	0	0	0	1		0	0	3	Female	Private residence/accommodation	N04A	Saturday	Y	0	0	1	1	1	1	N04	Costing 2014-2015	Dandenong	4400000	8700000	42039.5	42042.5	3	8008.17
3537369	42	3.64	2.01563	0	12	0	0	0	0	0	0	0	0	1	0	0	1		0	0	2.04167	Male	Private residence/accommodation	J60B	Monday	N	0	0	1	0	1	1	J60	Costing 2014-2015	Dandenong	332093	8600000	42007.5	42009.5	2	2133.1
3558062	90	3.64	12.8867	1	12	0	0	0	0	0	0	0	0	0	0	0	1		0	0	12.875	Female	Other acute hosp/ext care/rehab/geri ctr	X07A	Tuesday	Y	0	0	1	1	1	1	X07	Costing 2014-2015	Dandenong	7100000	8700000	42039.6	42052.5	13	16706.6
3537512	33	3.64	4.04688	0	12	0	0	0	0	0	0	0	0	0	0	0	1		0	0	4.08333	Male	Statistical Separation	I27A	Thursday	N	0	0	1	1	1	1	I27	Costing 2014-2015	Dandenong	7900000	8600000	42008.6	42012.6	4	5580.23
3537871	49	3.64	1.39063	1	12	0	0	0	0	0	0	0	0	0	0	0	1		0	0	1.24435	Male	Private residence/accommodation	X02B	Tuesday	N	0	0	1	0	1	1	X02	Costing 2014-2015	Dandenong	7900000	8600000	42009.4	42010.8	1	9040.67
3545334	88	3.64	1.22266	1	12	0	0	0	0	0	0	0	0	0	0	0	1		0	0	1.20833	Female	Private residence/accommodation	J08B	Saturday	N	0	0	1	0	1	1	J08	Costing 2014-2015	Dandenong	4200000	8600000	42020.3	42021.5	1	2822.96
3541544	30	3.64	6.09766	1	12	0	0	0	0	0	0	0	0	0	0	0	1		0	0	3.4405	Female	Private residence/accommodation	N08Z	Friday	N	0	0	1	0	1	1	N08	Costing 2014-2015	Dandenong	2400000	8600000	42014.4	42020.5	6	12088.2
3551156	77	3.64	2.16406	0	12	0	0	0	0	0	0	0	0	1	0	0	1		0	0	18.1294	Female	Aged care residential facility	X07A	Monday	N	0	0	1	1	1	1	X07	Costing 2014-2015	Dandenong	4000000	8700000	42028.6	42030.8	2	4802.84
3550271	50	3.64	2.20313	0	12	0	0	0	0	0	0	0	0	0	0	0	1		0	0	2.20833	Female	Private residence/accommodation	N04B	Sunday	N	0	0	1	0	1	1	N04	Costing 2014-2015	Dandenong	4400000	8600000	42027.5	42029.7	2	6519.55
3545801	24	3.64	1.07422	0	12	0	0	0	0	0	0	0	0	0	0	0	1		0	0	1.08333	Male	Private residence/accommodation	I17B	Saturday	N	0	0	1	0	1	1	I17	Costing 2014-2015	Dandenong	2400000	8600000	42020.4	42021.5	1	5843.83
3541554	23	3.64	1.80859	1	12	0	0	0	0	0	0	0	0	0	0	0	1		0	0	1.37049	Male	Private residence/accommodation	I30Z	Monday	N	0	0	1	0	1	1	I30	Costing 2014-2015	Dandenong	2500000	8600000	42014.7	42016.5	2	7310.46
3555715	38	3.64	4.58594	1	12	0	0	0	0	0	0	0	0	0	0	0	1		0	0	2.87922	Female	Private residence/accommodation	G70B	Thursday	N	0	0	1	0	1	1	G70	Costing 2014-2015	Dandenong	2300000	8700000	42036	42040.6	4	6768.33
3543225	61	3.64	1.09766	0	12	0	0	0	0	0	0	0	0	0	0	0	1		0	0	1.125	Male	Private residence/accommodation	D14A	Wednesday	N	0	0	1	1	1	1	D14	Costing 2014-2015	Dandenong	7900000	8600000	42017.4	42018.5	1	3165.87
3542279	46	3.64	12.2734	0	12	0	0	0	0	0	0	0	0	1	0	0	1		0	0	12.2917	Female	Private residence/accommodation	J08A	Saturday	Y	0	0	1	1	1	1	J08	Costing 2014-2015	Dandenong	377341	8600000	42016.3	42028.6	12	16856.6
3559278	76	3.64	3.48438	0	12	0	0	0	0	0	0	0	0	1	0	0	1		0	0	3.5	Male	Private residence/accommodation	J08A	Monday	N	0	0	1	1	1	1	J08	Costing 2014-2015	Dandenong	2300000	8700000	42041.3	42044.8	3	7822.51
3546467	59	3.64	1.21484	0	12	0	0	0	0	0	0	0	0	0	0	0	1		0	0	1.54716	Female	Private residence/accommodation	I30Z	Monday	N	0	0	1	0	1	1	I30	Costing 2014-2015	Dandenong	7900000	8600000	42022.3	42023.5	1	3495.02
3545794	48	3.64	3.05078	1	12	0	0	0	0	0	0	0	0	0	0	0	1		0	0	2.4795	Male	Private residence/accommodation	X05A	Monday	N	0	0	1	1	1	1	X05	Costing 2014-2015	Dandenong	4400000	8600000	42020.5	42023.5	3	4018.29
3551489	28	3.64	3.17578	0	12	0	0	0	0	0	0	0	0	0	0	0	1		2.12083	3054	2.07037	Female	Private residence/accommodation	J08B	Wednesday	N	0	0	1	0	1	1	J08	Costing 2014-2015	Dandenong	7900000	8700000	42029.7	42032.8	3	4852.28
3548696	85	3.64	9.01563	1	12	0	0	0	1	0	0	0	1	0	0	0	1		0	0	9	Male	Private residence/accommodation	J08A	Friday	Y	1	0	1	1	1	1	J08	Costing 2014-2015	Dandenong	7900000	8600000	42025.5	42034.5	9	11674.5
3555165	26	3.64	9.9375	1	12	0	0	0	0	0	0	0	0	0	0	0	1		0	0	7.39213	Male	Private residence/accommodation	Y02B	Monday	Y	0	0	1	0	1	1	Y02	Costing 2014-2015	Dandenong	7900000	8700000	42034.7	42044.7	10	16280.4
3546852	82	3.64	32.1211	0	12	0	0	0	0	0	0	0	0	0	0	0	1		0	0	32.125	Female	Other acute hosp/ext care/rehab/geri ctr	A06A	Friday	Y	0	0	1	1	1	1	A06	Costing 2014-2015	Dandenong	768168	8600000	42023.3	42055.4	32	88023.9
3539671	19	3.64	2.18359	1	12	0	0	0	0	0	0	0	0	0	0	0	1		0	0	2.16667	Female	Private residence/accommodation	D14B	Friday	N	0	0	1	0	1	1	D14	Costing 2014-2015	Dandenong	7900000	8600000	42011.3	42013.5	2	9461.57
3538839	44	3.64	0.875	0	12	0	0	0	0	0	0	0	0	0	0	0	1		0	0	2.14839	Male	Private residence/accommodation	J08B	Wednesday	N	0	0	1	0	1	1	J08	Costing 2014-2015	Dandenong	4200000	8600000	42010.6	42011.5	1	2103.74
3556114	51	3.64	4.24609	1	12	0	0	0	0	0	0	0	0	0	0	0	1		0	0	2.93862	Female	Private residence/accommodation	I66B	Friday	N	0	0	1	0	1	1	I66	Costing 2014-2015	Dandenong	2100000	8700000	42037.3	42041.5	4	3607.53
3551286	42	3.64	5.66016	0	12	0	0	0	0	0	0	0	0	0	0	0	1		3.92083	5646	3.32157	Male	Private residence/accommodation	J08A	Friday	N	0	0	1	1	1	1	J08	Costing 2014-2015	Dandenong	2100000	8700000	42029	42034.6	6	4558.82
3537727	63	3.64	1.64453	1	12	0	0	0	0	0	0	0	0	0	0	0	1		0	0	1.625	Male	Private residence/accommodation	F74A	Tuesday	N	0	0	1	1	1	1	F74	Costing 2014-2015	Dandenong	7400000	8600000	42009	42010.6	2	2460.54
3550820	32	3.64	1.46094	0	12	0	0	0	0	0	0	0	0	0	0	0	1		0	0	1.85047	Female	Private residence/accommodation	O61Z	Sunday	N	0	0	1	0	1	1	O61	Costing 2014-2015	Dandenong	7300000	8700000	42028.1	42029.5	1	2021.29
3541038	23	3.64	1.07422	0	12	0	0	0	0	0	0	0	0	0	0	0	1		0	0	1.48538	Male	Private residence/accommodation	I30Z	Saturday	N	0	0	1	0	1	1	I30	Costing 2014-2015	Dandenong	7900000	8600000	42013.5	42014.6	1	4545.53
3537217	36	3.64	1.01563	0	12	0	0	0	0	0	0	0	0	0	0	0	1		0	0	1.39595	Male	Private residence/accommodation	I30Z	Sunday	N	0	0	1	0	1	1	I30	Costing 2014-2015	Dandenong	7900000	8600000	42007.7	42008.8	1	1802.84
3538321	42	3.64	1.78125	0	12	0	0	0	0	0	0	0	0	0	0	0	1		0	0	3.32157	Male	Private residence/accommodation	J08A	Wednesday	N	0	0	1	1	1	1	J08	Costing 2014-2015	Dandenong	7700000	8600000	42009.7	42011.5	2	3119.66
3553344	56	3.64	0.277344	0	12	0	0	0	0	0	0	0	0	0	0	0	1		0	0	0.30143	Male	Private residence/accommodation	X04B	Wednesday	N	0	0	1	0	1	1	X04	Costing 2014-2015	Dandenong	7800000	8700000	42032.6	42032.9	1	1128.59
3546946	20	3.64	16.6367	1	12	0	0	0	0	0	0	0	0	0	0	0	1		0	0	16.625	Male	Private residence/accommodation	X07A	Wednesday	Y	0	0	1	1	1	1	X07	Costing 2014-2015	Dandenong	4700000	8600000	42022.9	42039.5	17	26007.7
3542329	31	3.64	1.05859	0	12	0	0	0	0	0	0	0	0	0	0	0	1		0	0	1.42867	Female	Private residence/accommodation	X63B	Tuesday	N	0	0	1	0	1	1	X63	Costing 2014-2015	Dandenong	69117	8600000	42016.4	42017.4	1	1184.36
3553346	39	3.64	0.257813	0	12	0	0	0	0	0	0	0	0	0	0	0	1		0	0	0.312854	Female	Private residence/accommodation	N09Z	Wednesday	N	0	0	1	0	1	1	N09	Costing 2014-2015	Dandenong	2100000	8700000	42032.6	42032.8	1	1213.75
3549513	27	3.64	1.10156	0	12	0	0	0	0	0	0	0	0	0	0	0	1		0	0	1.125	Female	Private residence/accommodation	N07A	Friday	N	0	0	1	1	1	1	N07	Costing 2014-2015	Dandenong	820559	8600000	42026.5	42027.6	1	6154.82
3552301	25	3.64	0.515625	1	12	0	0	0	0	0	0	0	0	0	0	0	1		0	0	0.5	Female	Private residence/accommodation	N07B	Tuesday	N	0	0	1	0	1	1	N07	Costing 2014-2015	Dandenong	4100000	8700000	42031.3	42031.9	1	3332
3554940	37	3.64	1.13281	1	12	0	0	0	0	0	0	0	0	0	0	0	1		0	0	0.969683	Female	Private residence/accommodation	O05Z	Saturday	N	0	0	1	0	1	1	O05	Costing 2014-2015	Dandenong	7600000	8700000	42034.6	42035.7	1	2153.51
3542811	37	3.64	10.2852	1	12	0	0	0	0	0	0	0	0	0	0	0	1		6.10208	8787	4.18958	Female	Private residence/accommodation	J68B	Thursday	N	0	0	1	0	1	1	J68	Costing 2014-2015	Dandenong	4200000	8600000	42016.3	42026.6	10	13080.6
3551237	58	3.64	0.75	0	12	0	0	0	0	0	0	0	0	0	0	0	1		0	0	2.45944	Male	Left against Medical Advice	I75A	Sunday	N	0	0	1	1	1	1	I75	Costing 2014-2015	Dandenong	7900000	8700000	42028.8	42029.5	1	1656.61
3554165	60	3.64	24.6875	1	12	0	0	0	0	0	0	0	0	0	0	0	1		0	0	24.6667	Male	Other acute hosp/ext care/rehab/geri ctr	J12A	Monday	Y	0	0	1	1	1	1	J12	Costing 2014-2015	Dandenong	7900000	8700000	42033.9	42058.6	25	29636.9
3548684	51	3.64	1	0	12	0	0	0	0	0	0	0	0	0	0	0	1		0	0	1	Male	Private residence/accommodation	D04Z	Thursday	N	0	0	1	0	1	1	D04	Costing 2014-2015	Dandenong	7900000	8600000	42025.4	42026.4	1	7301.62
3553418	67	3.64	38.0586	1	12	0	0	0	0	0	0	1	1	1	0	0	1		0	0	38.0417	Male	Private residence/accommodation	Y03Z	Saturday	Y	1	0	1	0	1	1	Y03	Costing 2014-2015	Dandenong	7400000	8700000	42032.6	42070.6	38	66004.2
3545541	31	3.64	0.152344	0	12	0	0	0	0	0	0	0	0	0	0	0	1		0	0	0.341171	Male	Private residence/accommodation	X06B	Friday	N	0	0	1	0	1	1	X06	Costing 2014-2015	Dandenong	324600	8600000	42020.5	42020.7	1	807.295
3542031	84	3.64	5.83203	0	12	0	0	0	0	0	0	0	0	0	0	0	1		0	0	5.83333	Male	Private residence/accommodation	J08B	Saturday	Y	0	0	1	0	1	1	J08	Costing 2014-2015	Dandenong	462515	8600000	42015.6	42021.4	6	8899.38
3551591	35	3.64	3.62891	1	12	0	0	0	0	0	0	0	0	0	0	0	1		0	0	1.54364	Male	Left against Medical Advice	J64B	Thursday	N	0	0	1	0	1	1	J64	Costing 2014-2015	Dandenong	850931	8700000	42029.7	42033.3	4	5056.19
3552108	44	3.64	8.375	0	12	0	0	0	0	0	0	0	0	0	0	0	1		4.09653	5899	4.27847	Female	Private residence/accommodation	J06B	Wednesday	Y	0	0	1	0	1	1	J06	Costing 2014-2015	Dandenong	4200000	8700000	42031.3	42039.7	8	11669.7
3540604	86	3.64	7.63672	0	12	0	0	1	0	0	0	0	1	0	0	0	1		0	0	11.6521	Female	Other acute hosp/ext care/rehab/geri ctr	I03A	Friday	Y	1	0	1	1	1	1	I03	Costing 2014-2015	Dandenong	2000000	8600000	42012.8	42020.4	8	9755.78
3554482	64	3.64	28.1367	0	12	0	0	0	0	0	0	0	0	0	0	0	1		0	0	28.1667	Female	Private residence/accommodation	A06A	Friday	Y	0	0	1	1	1	1	A06	Costing 2014-2015	Dandenong	7800000	8700000	42034.3	42062.4	28	70793.5
3552387	49	3.64	1.05469	0	12	0	0	0	0	0	0	0	0	0	0	0	1		0	0	1.08333	Male	Private residence/accommodation	D04Z	Wednesday	N	0	0	1	0	1	1	D04	Costing 2014-2015	Dandenong	4300000	8700000	42031.5	42032.5	1	7914.4
3554336	48	3.64	1.02734	1	12	0	0	0	0	0	0	0	0	0	0	0	1		0	0	1	Female	Private residence/accommodation	N05A	Friday	N	0	0	1	1	1	1	N05	Costing 2014-2015	Dandenong	2500000	8700000	42033.4	42034.4	1	6017.77
3550484	80	3.64	25.8047	0	12	0	0	0	1	0	0	0	1	0	0	0	1		0	0	25.8333	Female	Statistical Separation	Y03Z	Wednesday	Y	1	0	1	0	1	1	Y03	Costing 2014-2015	Dandenong	2500000	8600000	42027.7	42053.5	26	31431.2
3555302	53	3.64	10.2891	1	12	0	0	0	0	0	0	0	0	0	0	0	1		0.74375	1071	1.86583	Male	Private residence/accommodation	X06B	Tuesday	N	0	0	1	0	1	1	X06	Costing 2014-2015	Dandenong	7900000	8700000	42035.2	42045.5	10	8056.06
3548234	73	3.64	2.38281	0	12	0	0	0	0	0	0	0	0	0	0	0	1		1.0125	1458	1.28125	Male	Private residence/accommodation	J11Z	Thursday	N	0	0	1	0	1	1	J11	Costing 2014-2015	Dandenong	1000000	8600000	42024.3	42026.7	2	4328.32
3543809	75	3.64	7.26172	1	12	0	0	0	0	0	0	0	0	0	0	0	1		0	0	2.50148	Female	Private residence/accommodation	H64B	Wednesday	N	0	0	1	0	1	1	H64	Costing 2014-2015	Dandenong	4300000	8600000	42018.2	42025.5	7	7186.16
3541153	77	3.64	19.125	1	12	0	0	0	1	0	0	0	1	0	0	0	1		0	0	15.8474	Female	Private residence/accommodation	T01A	Wednesday	Y	1	0	1	1	1	1	T01	Costing 2014-2015	Dandenong	4700000	8600000	42013.7	42032.8	19	21483
3537704	26	3.64	2.50391	1	12	0	0	0	0	0	0	0	0	0	0	0	1		0	0	2.5	Male	Private residence/accommodation	U64Z	Wednesday	N	0	0	1	0	1	1	U64	Costing 2014-2015	Dandenong	2500000	8600000	42009.2	42011.7	2	3816.88
3537708	30	3.64	0.59375	1	12	0	0	0	0	0	0	0	0	0	0	0	1		0	0	0.300405	Female	Private residence/accommodation	O05Z	Monday	N	0	0	1	0	1	1	O05	Costing 2014-2015	Dandenong	4700000	8600000	42009.3	42009.9	1	2088.95
3549697	40	3.64	0.347656	1	12	0	0	0	0	0	0	0	0	0	0	0	1		0	0	0.275654	Male	Private residence/accommodation	X05B	Thursday	N	0	0	1	0	1	1	X05	Costing 2014-2015	Dandenong	7900000	8600000	42026.6	42027	1	1502.03
3552929	39	3.64	2.80078	0	12	0	0	0	0	0	0	0	0	0	0	0	1		0	0	6.14001	Male	Left against Medical Advice	G46B	Friday	N	0	0	1	0	1	1	G46	Costing 2014-2015	Dandenong	1000000	8700000	42032.1	42034.9	2	4286.6
3551366	26	3.64	0.136719	0	12	0	0	0	0	0	0	0	0	0	0	0	1		0	0	0.166667	Male	Private residence/accommodation	J08C	Sunday	N	0	0	1	0	1	1	J08	Costing 2014-2015	Dandenong	7900000	8700000	42029.2	42029.4	1	269.061
3541558	73	3.64	11.793	1	12	0	0	0	0	0	0	1	1	0	0	0	1		0	0	11.3591	Male	Statistical Separation	I08A	Thursday	Y	1	0	1	1	1	1	I08	Costing 2014-2015	Dandenong	4400000	8600000	42014.7	42026.5	12	36907.2
3537568	62	3.64	2.93359	0	12	0	0	0	0	0	0	0	0	0	0	0	1		0	0	2.95833	Male	Private residence/accommodation	I28A	Wednesday	Y	0	0	1	1	1	1	I28	Costing 2014-2015	Dandenong	2200000	8600000	42008.7	42011.6	3	6941.98
3545096	72	3.64	6.19922	0	12	0	0	0	1	0	0	0	1	0	0	0	1		0	0	6.20833	Female	Private residence/accommodation	N04A	Wednesday	Y	1	0	1	1	1	1	N04	Costing 2014-2015	Dandenong	495247	8600000	42019.5	42025.7	6	12151.3
3541526	43	3.64	0.347656	1	12	0	0	0	0	0	0	0	0	0	0	0	1		0	0	0.333333	Male	Private residence/accommodation	G70C	Saturday	N	0	0	1	0	1	1	G70	Costing 2014-2015	Dandenong	7500000	8600000	42014.3	42014.6	1	798.487
3550459	42	3.64	1.75	1	12	0	0	0	0	0	0	0	0	0	0	0	1		0	0	1.10653	Female	Private residence/accommodation	Y62B	Sunday	N	0	0	1	0	1	1	Y62	Costing 2014-2015	Dandenong	4300000	8600000	42027.7	42029.4	2	1874.7
3553048	41	3.64	2.12109	0	12	0	0	0	0	0	0	0	0	1	0	0	1		0	0	3.6535	Male	Left against Medical Advice	X06A	Friday	N	0	0	1	1	1	1	X06	Costing 2014-2015	Dandenong	2300000	8700000	42032.3	42034.4	2	3001.6
3556278	92	3.64	7.09375	0	12	0	0	0	0	0	0	0	0	0	0	0	1		0	0	7.125	Female	Private residence/accommodation	J08A	Monday	Y	0	0	1	1	1	1	J08	Costing 2014-2015	Dandenong	2000000	8700000	42037.4	42044.5	7	9384.67
3549295	47	3.64	103.633	1	12	0	0	0	0	0	0	0	0	0	0	0	1		91.7354	132099	16.436	Male	Private residence/accommodation	T01A	Tuesday	Y	0	0	1	1	1	1	T01
3552696	68	3.64	18.0117	1	12	0	0	0	0	0	0	0	0	0	0	0	1		0	0	18	Male	Other acute hosp/ext care/rehab/geri ctr	X06A	Saturday	Y	0	0	1	1	1	1	X06	Costing 2014-2015	Dandenong	4700000	8700000	42031.7	42049.7	18	30977.7
3541366	71	3.64	2.22656	1	12	0	0	0	0	0	0	0	0	0	0	0	1		0	0	2.20833	Male	Other acute hosp/ext care/rehab/geri ctr	D60A	Monday	Y	0	0	1	1	1	1	D60	Costing 2014-2015	Dandenong	2300000	8600000	42014.2	42016.4	2	2522.22
3543062	60	3.64	5.16016	0	12	0	0	0	0	0	0	0	0	0	0	0	1		0	0	5.16667	Female	Private residence/accommodation	J06A	Sunday	Y	0	0	1	1	1	1	J06	Costing 2014-2015	Dandenong	265255	8600000	42017.3	42022.4	5	11192.9
3547507	23	3.64	0.863281	0	12	0	0	0	0	0	0	0	0	0	0	0	1		0	0	1.49078	Male	Private residence/accommodation	X05B	Tuesday	N	0	0	1	0	1	1	X05	Costing 2014-2015	Dandenong	459017	8600000	42023.5	42024.3	1	3145
3545481	37	3.64	1.03125	0	12	0	0	0	0	0	0	0	0	0	0	0	1		0	0	1.04167	Male	Private residence/accommodation	D40Z	Saturday	N	0	0	1	0	1	1	D40	Costing 2014-2015	Dandenong	7900000	8600000	42020.5	42021.5	1	4282.03
3553911	37	3.64	0.597656	1	12	0	0	0	0	0	0	0	0	0	0	0	1		0	0	0.583333	Female	Private residence/accommodation	N08Z	Thursday	N	0	0	1	0	1	1	N08	Costing 2014-2015	Dandenong	4300000	8700000	42033.4	42034	1	2480.93
3537263	43	3.64	0.792969	0	12	0	0	0	0	0	0	0	0	0	0	0	1		0	0	2.54123	Female	Private residence/accommodation	T61B	Sunday	N	0	0	1	0	1	1	T61	Costing 2014-2015	Dandenong	492185	8600000	42008	42008.8	1	1048.86
3551244	30	3.64	0.714844	0	12	0	0	0	0	0	0	0	0	0	0	0	1		0	0	1.02119	Female	Private residence/accommodation	O05Z	Sunday	N	0	0	1	0	1	1	O05	Costing 2014-2015	Dandenong	7200000	8700000	42028.8	42029.5	1	2934.13
3559080	43	3.64	7.19922	0	12	0	0	0	0	0	0	0	0	0	0	0	1		0	0	7.20833	Female	Private residence/accommodation	X02A	Thursday	N	0	0	1	1	1	1	X02	Costing 2014-2015	Dandenong	2300000	8700000	42040.3	42047.5	7	10059.7
3555742	22	3.64	1.70703	1	12	0	0	0	0	0	0	0	0	0	0	0	1		0	0	1.47875	Female	Private residence/accommodation	X06B	Monday	Y	0	0	1	0	1	1	X06	Costing 2014-2015	Dandenong	484181	8700000	42036.1	42037.8	1	2862.65
3555762	41	3.64	1.94141	1	12	0	0	0	0	0	0	0	0	0	0	0	1		0	0	1.46647	Male	Left against Medical Advice	X60A	Tuesday	N	0	0	1	1	1	1	X60	Costing 2014-2015	Dandenong	2300000	8700000	42036.3	42038.2	2	1945.69
3556667	42	3.64	1.69922	0	12	0	0	0	0	0	0	0	0	0	0	0	1		0	0	1.70833	Male	Private residence/accommodation	D14B	Wednesday	N	0	0	1	0	1	1	D14	Costing 2014-2015	Dandenong	7900000	8700000	42037.9	42039.6	2	3639.27
3547645	24	3.64	0.738281	1	12	0	0	0	0	0	0	0	0	0	0	0	1		0	0	0.364404	Male	Private residence/accommodation	X02A	Tuesday	N	0	0	1	1	1	1	X02	Costing 2014-2015	Dandenong	4400000	8600000	42024.1	42024.8	1	5376.91
3555011	40	3.64	1.80859	0	12	0	0	0	0	0	0	0	0	0	0	0	1		0	0	3.30524	Female	Private residence/accommodation	J63A	Sunday	N	0	0	1	1	1	1	J63	Costing 2014-2015	Dandenong	7400000	8700000	42034.7	42036.5	2	3453.73
3550945	53	3.64	0.828125	0	12	0	0	0	0	0	0	0	0	0	0	0	1		0	0	1.23401	Male	Private residence/accommodation	X02B	Saturday	N	0	0	1	0	1	1	X02	Costing 2014-2015	Dandenong	7900000	8600000	42027.8	42028.6	1	1703.91
3556866	23	3.64	1.92188	1	12	0	0	0	0	0	0	0	0	0	0	0	1		0	0	1.07881	Female	Private residence/accommodation	N62Z	Wednesday	N	0	0	1	0	1	1	N62	Costing 2014-2015	Dandenong	2400000	8700000	42037.7	42039.6	2	2535.89
3548965	32	3.64	3.70703	1	12	0	0	0	0	0	0	0	0	0	0	0	1		0	0	1.44494	Female	Private residence/accommodation	O03B	Sunday	N	0	0	1	0	1	1	O03	Costing 2014-2015	Dandenong	2400000	8600000	42025.8	42029.5	4	8307.81
3542760	74	3.64	1.66406	0	12	0	0	0	0	0	0	0	0	0	0	0	1		0	0	2.10521	Male	Private residence/accommodation	X06B	Wednesday	N	0	0	1	0	1	1	X06	Costing 2014-2015	Dandenong	4700000	8600000	42016.8	42018.5	2	3236.97
3547784	75	3.64	21.2539	1	12	0	0	0	0	0	0	0	0	0	0	0	1		17.0181	24506	4.23194	Male	Other acute hosp/ext care/rehab/geri ctr	J10Z	Tuesday	Y	0	0	1	0	1	1	J10	Costing 2014-2015	Dandenong	2000000	8600000	42024.3	42045.6	21	18707.1
3538546	56	3.64	23.3281	0	12	0	0	0	0	0	0	0	0	0	0	0	1		9.98056	14372	13.3528	Male	Private residence/accommodation	I28A	Thursday	N	0	0	1	1	1	1	I28	Costing 2014-2015	Dandenong	4000000	8600000	42010.4	42033.7	23	24488.7
3553853	69	3.64	1.00391	1	12	0	0	0	0	0	0	0	0	0	0	0	1		0	0	1	Male	Private residence/accommodation	J11Z	Friday	N	0	0	1	0	1	1	J11	Costing 2014-2015	Dandenong	7800000	8700000	42033.3	42034.3	1	2486.97
3537570	66	3.64	1.125	0	12	0	0	0	0	0	0	0	0	0	0	0	1		0	0	1.125	Female	Private residence/accommodation	D60B	Monday	N	0	0	1	0	1	1	D60	Costing 2014-2015	Dandenong	2200000	8600000	42008.6	42009.8	1	4173.34
3554400	76	3.64	4.125	0	12	0	0	0	0	0	0	0	0	0	0	0	1		0	0	4.125	Female	Private residence/accommodation	Q61A	Monday	N	0	0	1	1	1	1	Q61	Costing 2014-2015	Dandenong	7200000	8700000	42033.5	42037.6	4	6118.23
3540613	27	3.64	1.78906	0	12	0	0	0	0	0	0	0	0	0	0	0	1		0	0	1.79167	Female	Private residence/accommodation	N07A	Saturday	N	0	0	1	1	1	1	N07	Costing 2014-2015	Dandenong	7800000	8600000	42012.8	42014.6	2	5338.36
3552389	62	3.64	3.09375	1	12	0	0	0	0	0	0	0	0	0	0	0	1		0	0	3.08333	Female	Private residence/accommodation	J06B	Friday	Y	0	0	1	0	1	1	J06	Costing 2014-2015	Dandenong	220111	8700000	42031.5	42034.6	3	7698.43
3549954	61	3.64	1.33203	0	12	0	0	0	0	0	0	0	0	0	0	0	1		0	0	1.33333	Male	Private residence/accommodation	F20Z	Saturday	N	0	0	1	0	1	1	F20	Costing 2014-2015	Dandenong	4200000	8600000	42027.3	42028.6	1	5424.56
3556946	37	3.64	1.3125	0	12	0	0	0	0	0	0	0	0	0	0	0	1		0	0	1.33333	Female	Private residence/accommodation	D63B	Wednesday	N	0	0	1	0	1	1	D63	Costing 2014-2015	Dandenong	7200000	8700000	42038.1	42039.5	1	1511.98
3557853	68	3.64	3.16406	0	12	0	0	0	0	0	0	0	0	0	0	0	1		0	0	3.16667	Female	Private residence/accommodation	K06B	Saturday	N	0	0	1	0	1	1	K06	Costing 2014-2015	Dandenong	7700000	8700000	42039.4	42042.6	3	9917.43
3578599	76	4.2	1.11328	0	13	0	0	0	0	0	0	0	0	0	0	0	1		0	0	1.125	Female	Private residence/accommodation	X63B	Friday	N	0	0	1	0	1	1	X63	Costing 2014-2015	Dandenong	4000000	8700000	42068.3	42069.5	1	1259.49
3573710	88	4.2	11.0547	0	13	0	0	1	0	0	0	0	1	1	0	0	1		4.73472	6818	6.34861	Female	Private residence/accommodation	J64A	Tuesday	Y	1	0	1	1	1	1	J64	Costing 2014-2015	Dandenong	2200000	8700000	42062.3	42073.3	11	11220.9
3577932	38	4.2	37.1445	0	13	0	0	0	0	0	0	0	0	1	0	0	1		0	0	37.1667	Male	Private residence/accommodation	D02A	Saturday	Y	0	0	1	1	1	1	D02
3576168	27	4.2	2.82422	0	13	0	0	0	0	0	0	0	0	0	0	0	1		0	0	2.83333	Female	Private residence/accommodation	D14B	Thursday	N	0	0	1	0	1	1	D14	Costing 2014-2015	Dandenong	7900000	8700000	42065.6	42068.5	3	5859.87
3562736	43	4.2	1.91797	1	13	0	0	0	0	0	0	0	0	0	0	0	1		0	0	1.91667	Female	Private residence/accommodation	K06B	Friday	N	0	0	1	0	1	1	K06	Costing 2014-2015	Dandenong	4600000	8700000	42046.5	42048.4	2	7983.1
3570515	83	4.2	32.793	1	13	1	0	0	1	0	0	1	2	0	0	0	1		0	0	32.7917	Male	Death	A06A	Saturday	Y	1	0	1	1	1	1	A06	Costing 2014-2015	Dandenong	7900000	8700000	42058.3	42091.1	33	94782.6
3575580	65	4.2	40.1836	1	13	0	0	0	0	0	0	1	1	0	0	0	1		0	0	40.1667	Female	Private residence/accommodation	A06A	Saturday	Y	1	0	1	1	1	1	A06
3577420	23	4.2	6.05859	1	13	0	0	0	0	0	0	0	0	0	0	0	1		0	0	6.04167	Female	Statistical Separation	N12A	Tuesday	N	0	0	1	1	1	1	N12	Costing 2014-2015	Dandenong	4500000	8700000	42067.5	42073.5	6	9757.47
3574953	28	4.2	3.46875	1	13	0	0	0	0	0	0	0	0	0	0	0	1		0	0	3.45833	Male	Private residence/accommodation	G70B	Tuesday	Y	0	0	1	0	1	1	G70	Costing 2014-2015	Dandenong	7900000	8700000	42063.2	42066.6	3	4007.23
3565581	87	4.2	6.07813	0	13	0	0	0	0	0	0	0	0	0	0	0	1		0	0	6.08333	Female	Private residence/accommodation	X07A	Saturday	Y	0	0	1	1	1	1	X07	Costing 2014-2015	Dandenong	4000000	8700000	42050.6	42056.7	6	7182.07
3572777	34	4.2	2.25781	1	13	0	0	0	0	0	0	0	0	0	0	0	1		0	0	1.74533	Male	Private residence/accommodation	I27B	Friday	N	0	0	1	0	1	1	I27	Costing 2014-2015	Dandenong	7900000	8700000	42060.4	42062.6	2	3752.53
3574558	23	4.2	1.57813	1	13	0	0	0	0	0	0	0	0	0	0	0	1		0	0	1.42867	Male	Private residence/accommodation	X63B	Sunday	N	0	0	1	0	1	1	X63	Costing 2014-2015	Dandenong	7900000	8700000	42062.9	42064.5	2	1738.72
3568906	45	4.2	2.42578	1	13	0	0	0	0	0	0	0	0	0	0	0	1		0	0	1.39595	Male	Private residence/accommodation	I30Z	Sunday	N	0	0	1	0	1	1	I30	Costing 2014-2015	Dandenong	7300000	8700000	42054.9	42057.3	3	5414.31
3565539	46	4.2	0.953125	0	13	0	0	0	0	0	0	0	0	0	0	0	1		0	0	0.958333	Male	Private residence/accommodation	X05A	Monday	N	0	0	1	1	1	1	X05	Costing 2014-2015	Dandenong	2300000	8700000	42050.7	42051.6	1	2084.59
3564593	51	4.2	8.90625	1	13	0	0	0	0	0	0	0	0	0	0	0	1		0	0	8.875	Female	Left against Medical Advice	Y03Z	Friday	Y	0	0	1	0	1	1	Y03	Costing 2014-2015	Dandenong	2400000	8700000	42046.8	42055.7	9	10496.2
3575519	51	4.2	3.46484	1	13	0	0	0	0	0	0	0	0	0	0	0	1		0	0	3.45833	Female	Private residence/accommodation	J60B	Thursday	N	0	0	1	0	1	1	J60	Costing 2014-2015	Dandenong	4300000	8700000	42065	42068.5	3	3135.33
3564183	90	4.2	6.56641	0	13	0	0	0	0	0	0	0	0	0	0	0	1		0	0	6.58333	Male	Statistical Separation	I72A	Wednesday	Y	0	0	1	1	1	1	I72	Costing 2014-2015	Dandenong	2500000	8700000	42046.9	42053.5	7	6617.24
3579484	25	4.2	2.16406	1	13	0	0	0	0	0	0	0	0	0	0	0	1		0	0	1.07881	Female	Private residence/accommodation	N62Z	Sunday	N	0	0	1	0	1	1	N62	Costing 2014-2015	Dandenong	4600000	8700000	42069.4	42071.6	2	2765.18
3572103	68	4.2	19.7813	0	13	0	0	0	0	0	0	0	0	0	0	0	1		0	0	19.7917	Male	Statistical Separation	T01A	Monday	Y	0	0	1	1	1	1	T01	Costing 2014-2015	Dandenong	4700000	8700000	42059.8	42079.6	20	31454.2
3574989	40	4.2	2.98047	0	13	0	0	0	0	0	0	0	0	0	0	0	1		0	0	3	Male	Private residence/accommodation	D14A	Tuesday	N	0	0	1	1	1	1	D14	Costing 2014-2015	Dandenong	2500000	8700000	42063.7	42066.7	3	6859.94
3565750	23	4.2	3.73828	0	13	0	0	0	0	0	0	0	0	1	0	0	1		0	0	7.00742	Female	Left against Medical Advice	T01B	Thursday	N	0	0	1	0	1	1	T01	Costing 2014-2015	Dandenong	2400000	8700000	42051.1	42054.8	3	6344.09
3576239	22	4.2	0.503906	0	13	0	0	0	0	0	0	0	0	0	0	0	1		0	0	0.541667	Male	Private residence/accommodation	D14A	Tuesday	N	0	0	1	1	1	1	D14	Costing 2014-2015	Dandenong	441208	8700000	42066.3	42066.8	1	3366.3
3577126	41	4.2	0.691406	1	13	0	0	0	0	0	0	0	0	0	0	0	1		0	0	0.243475	Male	Private residence/accommodation	X63B	Wednesday	N	0	0	1	0	1	1	X63	Costing 2014-2015	Dandenong	7800000	8700000	42067	42067.7	1	692.63
3561651	49	4.2	8.375	0	13	0	0	0	0	0	0	0	0	0	0	0	1		0	0	8.375	Female	Private residence/accommodation	J01A	Wednesday	Y	0	0	1	1	1	1	J01	Costing 2014-2015	Dandenong	7600000	8700000	42045.3	42053.7	8	25841.8
3561175	80	4.2	10.957	0	13	0	0	0	0	0	0	0	0	0	0	0	1		4.67431	6731	6.28403	Male	Private residence/accommodation	J64A	Friday	N	0	0	1	1	1	1	J64	Costing 2014-2015	Dandenong	2300000	8700000	42044.5	42055.5	11	11870.7
3577454	28	4.2	2.05078	1	13	0	0	0	0	0	0	0	0	0	0	0	1		0	0	2.04167	Female	Private residence/accommodation	K06B	Friday	N	0	0	1	0	1	1	K06	Costing 2014-2015	Dandenong	2400000	8700000	42067.5	42069.5	2	6941.36
3560724	31	4.2	2.70703	0	13	0	0	0	0	0	0	0	0	0	0	0	1		0	0	2.70833	Male	Private residence/accommodation	D04Z	Wednesday	N	0	0	1	0	1	1	D04	Costing 2014-2015	Dandenong	879778	8700000	42043.8	42046.5	3	7150.52
3567499	88	4.2	2.15234	0	13	0	0	0	0	0	0	0	0	1	0	0	1		0	0	2.16667	Male	Private residence/accommodation	J11Z	Friday	N	0	0	1	0	1	1	J11	Costing 2014-2015	Dandenong	4300000	8700000	42053.4	42055.6	2	5454.45
3573700	78	4.2	2.25781	0	13	0	0	0	1	0	0	0	1	0	0	0	1		0	0	2.29167	Male	Other acute hosp/ext care/rehab/geri ctr	J13A	Sunday	Y	1	0	1	1	1	1	J13	Costing 2014-2015	Dandenong	4100000	8700000	42062.3	42064.5	2	3385.19
3570341	29	4.2	3.83594	1	13	0	0	0	0	0	0	0	0	0	0	0	1		0	0	2.6373	Male	Private residence/accommodation	X06A	Thursday	N	0	0	1	1	1	1	X06	Costing 2014-2015	Dandenong	7900000	8700000	42057.5	42061.4	4	6599.02
3571443	36	4.2	1.52734	0	13	0	0	0	0	0	0	0	0	0	0	0	1		0	0	1.85736	Male	Private residence/accommodation	I30Z	Wednesday	N	0	0	1	0	1	1	I30	Costing 2014-2015	Dandenong	7900000	8700000	42058.9	42060.4	2	4096.72
3578745	26	4.2	0.898438	0	13	0	0	0	0	0	0	0	0	0	0	0	1		0	0	1.26625	Male	Private residence/accommodation	C11Z	Friday	N	0	0	1	0	1	1	C11	Costing 2014-2015	Dandenong	799050	8700000	42068.9	42069.8	1	2086.54
3565536	53	4.2	17.9258	1	13	0	0	0	0	0	0	0	0	0	0	0	1		0	0	17.9167	Male	Private residence/accommodation	J01A	Thursday	Y	0	0	1	1	1	1	J01	Costing 2014-2015	Dandenong	2300000	8700000	42050.6	42068.6	18	49929.4
3560433	60	4.2	9.64063	0	13	0	0	0	0	0	0	0	0	0	0	0	1		0	0	15.3931	Female	Private residence/accommodation	G02A	Tuesday	Y	0	0	1	1	1	1	G02	Costing 2014-2015	Dandenong	7900000	8700000	42042.9	42052.5	10	18295.5
3566581	20	4.2	0.910156	0	13	0	0	0	0	0	0	0	0	0	0	0	1		0	0	1.37875	Male	Left against Medical Advice	J64B	Tuesday	N	0	0	1	0	1	1	J64	Costing 2014-2015	Dandenong	4000000	8700000	42052	42052.9	1	998.448
3568074	31	4.2	1.07813	0	13	0	0	0	0	0	0	0	0	0	0	0	1		0	0	1.49078	Male	Private residence/accommodation	X05B	Thursday	N	0	0	1	0	1	1	X05	Costing 2014-2015	Dandenong	7900000	8700000	42053.8	42054.9	1	2337.99
3579240	60	4.2	1.15625	0	13	0	0	0	0	0	0	0	0	1	0	0	1		0	0	1.16667	Female	Private residence/accommodation	D12A	Saturday	N	0	0	1	1	1	1	D12	Costing 2014-2015	Dandenong	2500000	8700000	42069.5	42070.6	1	2697.19
3563765	28	4.2	1.76953	1	13	0	0	0	0	0	0	0	0	0	0	0	1		0	0	1.376	Male	Private residence/accommodation	X06B	Saturday	N	0	0	1	0	1	1	X06	Costing 2014-2015	Dandenong	7900000	8700000	42047.9	42049.6	2	3434.4
3576274	58	4.2	1.64453	0	13	0	0	0	0	0	0	0	0	0	0	0	1		0	0	1.81013	Female	Private residence/accommodation	D66B	Wednesday	N	0	0	1	0	1	1	D66	Costing 2014-2015	Dandenong	705996	8700000	42065.8	42067.4	2	1909.56
3562495	51	4.2	1.44922	0	13	0	0	0	0	0	0	0	0	0	0	0	1		0	0	6.30733	Male	Private residence/accommodation	E42B	Thursday	N	0	0	1	0	1	1	E42	Costing 2014-2015	Dandenong	7700000	8700000	42046	42047.4	2	4575.56
3577937	48	4.2	4.19531	1	13	0	0	0	0	0	0	0	0	0	0	0	1		0	0	4.16667	Female	Private residence/accommodation	N04B	Monday	N	0	0	1	0	1	1	N04	Costing 2014-2015	Dandenong	2200000	8700000	42068.3	42072.5	4	8502.05
3575310	71	4.2	0.796875	0	13	0	0	0	0	0	0	0	0	1	0	0	1		0	0	2.12289	Male	Private residence/accommodation	J64B	Monday	N	0	0	1	0	1	1	J64	Costing 2014-2015	Dandenong	4000000	8700000	42064.7	42065.5	1	1456.36
3575400	32	4.2	1.73047	0	13	0	0	0	0	0	0	0	0	0	0	0	1		0	0	3.58621	Male	Private residence/accommodation	D66A	Tuesday	N	0	0	1	1	1	1	D66	Costing 2014-2015	Dandenong	729383	8700000	42064.6	42066.4	2	3666.6
3578946	40	4.2	2.58203	0	13	0	0	0	0	0	0	0	0	0	0	0	1		0	0	2.58333	Female	Private residence/accommodation	N04B	Sunday	N	0	0	1	0	1	1	N04	Costing 2014-2015	Dandenong	4600000	8700000	42069.3	42071.9	2	5974.64
3573031	30	4.2	1.66016	1	13	0	0	0	0	0	0	0	0	1	0	0	1		0	0	1.37049	Male	Private residence/accommodation	I30Z	Friday	N	0	0	1	0	1	1	I30	Costing 2014-2015	Dandenong	7400000	8700000	42061.1	42062.7	1	4115.77
3575420	46	4.2	1.61719	0	13	0	0	0	0	0	0	0	0	0	0	0	1		0	0	1.81962	Male	Private residence/accommodation	X63B	Tuesday	Y	0	0	1	0	1	1	X63	Costing 2014-2015	Dandenong	4600000	8700000	42064.8	42066.4	2	2036.48
3572868	36	4.2	1.92969	1	13	0	0	0	0	0	0	0	0	0	0	0	1		0	0	1.80228	Female	Private residence/accommodation	G70B	Friday	N	0	0	1	0	1	1	G70	Costing 2014-2015	Dandenong	7600000	8700000	42060.6	42062.6	2	3041.31
3562237	30	4.2	1.60156	1	13	0	0	0	0	0	0	0	0	0	0	0	1		0	0	1.10731	Female	Private residence/accommodation	N09Z	Thursday	N	0	0	1	0	1	1	N09	Costing 2014-2015	Dandenong	4300000	8700000	42045.8	42047.4	2	3613.63
3561437	28	4.2	1.91016	1	13	0	0	0	0	0	0	0	0	0	0	0	1		0	0	1.77177	Female	Private residence/accommodation	G07B	Wednesday	N	0	0	1	0	1	1	G07	Costing 2014-2015	Dandenong	7300000	8700000	42044.8	42046.7	2	4756.88
3567324	20	4.2	1.22266	0	13	0	0	0	0	0	0	0	0	0	0	0	1		0	0	2.32487	Female	Private residence/accommodation	I68A	Thursday	N	0	0	1	1	1	1	I68	Costing 2014-2015	Dandenong	4000000	8700000	42053.3	42054.5	1	2030.71
3561654	77	4.2	2.69141	0	13	0	0	0	0	0	0	0	0	0	0	0	1		0	0	5.51725	Female	Private residence/accommodation	X63A	Thursday	N	0	0	1	1	1	1	X63	Costing 2014-2015	Dandenong	4000000	8700000	42045	42047.7	3	2950.39
3566598	60	4.2	15.1289	1	13	0	0	0	0	0	0	0	0	1	0	0	1		0	0	15.125	Female	Private residence/accommodation	A06A	Wednesday	Y	0	0	1	1	1	1	A06	Costing 2014-2015	Dandenong	4400000	8700000	42052.3	42067.4	15	45674.1
3568262	61	4.2	5.20313	0	13	0	0	0	0	0	0	0	0	1	0	0	1		0	0	5.81138	Male	Private residence/accommodation	J64A	Tuesday	N	0	0	1	1	1	1	J64	Costing 2014-2015	Dandenong	2400000	8700000	42054.4	42059.6	5	5793.23
3575382	43	4.2	8.76563	1	13	0	0	0	0	0	0	0	0	0	0	0	1		0	0	3.15597	Male	Private residence/accommodation	X02A	Tuesday	N	0	0	1	1	1	1	X02	Costing 2014-2015	Dandenong	746598	8700000	42064.7	42073.5	9	23807.6
3577686	23	4.2	1.17578	0	13	0	0	0	0	0	0	0	0	0	0	0	1		0	0	1.95209	Female	Left against Medical Advice	T62B	Thursday	N	0	0	1	0	1	1	T62	Costing 2014-2015	Dandenong	2400000	8700000	42067.7	42068.9	1	1322.16
3572964	68	4.2	2.66016	0	13	0	0	0	0	0	0	0	0	0	0	0	1		0	0	2.78863	Male	Private residence/accommodation	X02A	Saturday	N	0	0	1	1	1	1	X02	Costing 2014-2015	Dandenong	2200000	8700000	42060.8	42063.5	3	6829.72
3575017	64	4.2	5.79688	1	13	0	0	0	0	0	0	0	0	0	0	0	1		0	0	3.25662	Male	Private residence/accommodation	G10A	Friday	N	0	0	1	1	1	1	G10	Costing 2014-2015	Dandenong	7900000	8700000	42063.9	42069.7	6	10914.1
3577419	18	4.2	1.01563	1	13	0	0	0	0	0	0	0	0	0	0	0	1		0	0	1	Male	Private residence/accommodation	D12B	Thursday	N	0	0	1	0	1	1	D12	Costing 2014-2015	Dandenong	4600000	8700000	42067.5	42068.5	1	7021.8
3574555	50	4.2	1.61328	0	13	0	0	0	0	0	0	0	0	1	0	0	1		0	0	2.1686	Female	Private residence/accommodation	G07B	Sunday	N	0	0	1	0	1	1	G07	Costing 2014-2015	Dandenong	7900000	8700000	42062.9	42064.5	2	5265.3
3564246	37	4.2	0.898438	0	13	0	0	0	0	0	0	0	0	0	0	0	1		0	0	0.916667	Female	Private residence/accommodation	I30Z	Saturday	N	0	0	1	0	1	1	I30	Costing 2014-2015	Dandenong	2300000	8700000	42048.4	42049.3	1	3709.61
3575602	64	4.2	2.41016	0	13	0	0	0	0	0	0	0	0	0	0	0	1		0	0	2.41667	Female	Private residence/accommodation	N06Z	Wednesday	Y	0	0	1	0	1	1	N06	Costing 2014-2015	Dandenong	2000000	8700000	42065.3	42067.7	2	5297.4
3561487	47	4.2	3.59766	1	13	0	0	0	0	0	0	0	0	0	0	0	1		0	0	3.58333	Female	Private residence/accommodation	G66A	Friday	Y	0	0	1	1	1	1	G66	Costing 2014-2015	Dandenong	2200000	8700000	42044.9	42048.5	4	4834.32
3578438	45	4.2	2.04297	1	13	0	0	0	0	0	0	0	0	0	0	0	1		0	0	1.39595	Female	Private residence/accommodation	I30Z	Saturday	N	0	0	1	0	1	1	I30	Costing 2014-2015	Dandenong	4400000	8700000	42068.6	42070.6	2	3358.31
3565319	84	4.2	5.79297	1	13	0	0	0	0	0	0	0	0	0	0	0	1		0	0	5.79167	Female	Private residence/accommodation	I28A	Friday	Y	0	0	1	1	1	1	I28	Costing 2014-2015	Dandenong	4400000	8700000	42050	42055.8	5	6714.48
3578624	30	4.2	22.2539	0	13	0	0	0	0	0	0	0	0	0	0	0	1		11.0278	15880	12.147	Male	Private residence/accommodation	I12A	Friday	Y	0	0	1	1	1	1	I12	Costing 2014-2015	Dandenong	7400000	8700000	42068.4	42090.7	22	21286.6
3579171	28	4.2	0.335938	1	13	0	0	0	0	0	0	0	0	0	0	0	1		0	0	0.333333	Male	Private residence/accommodation	X07A	Friday	N	0	0	1	1	1	1	X07	Costing 2014-2015	Dandenong	7900000	8700000	42069.5	42069.8	1	1385.77
3578997	73	4.2	5.17578	1	13	0	0	0	0	0	0	0	0	0	0	0	1		0	0	5.16667	Female	Private residence/accommodation	T01A	Wednesday	N	0	0	1	1	1	1	T01	Costing 2014-2015	Dandenong	2100000	8700000	42069.3	42074.5	5	7241.42
3565253	32	4.2	0.496094	0	13	0	0	0	0	0	0	0	0	0	0	0	1		0	0	1.02119	Female	Private residence/accommodation	O05Z	Sunday	N	0	0	1	0	1	1	O05	Costing 2014-2015	Dandenong	7400000	8700000	42050	42050.5	1	2706.82
3576782	45	4.2	0.886719	0	13	0	0	0	0	0	0	0	0	0	0	0	1		0	0	1.25061	Female	Private residence/accommodation	N62Z	Wednesday	N	0	0	1	0	1	1	N62	Costing 2014-2015	Dandenong	4700000	8700000	42066.7	42067.5	1	1502.94
3565164	32	4.2	0.09375	0	13	0	0	0	0	0	0	0	0	0	0	0	1		0	0	0.323782	Male	Private residence/accommodation	X60B	Saturday	N	0	0	1	0	1	1	X60	Costing 2014-2015	Dandenong	762864	8700000	42049.7	42049.8	1	238.86
3568964	77	4.2	2.21875	0	13	0	0	0	0	0	0	0	0	0	0	0	1		0	0	2.25	Female	Private residence/accommodation	N06Z	Sunday	N	0	0	1	0	1	1	N06	Costing 2014-2015	Dandenong	4100000	8700000	42055.3	42057.5	2	6041.39
3570684	64	4.2	16.7266	1	13	0	0	0	0	0	0	0	0	0	0	0	1		0	0	16.7083	Female	Other acute hosp/ext care/rehab/geri ctr	X07A	Wednesday	Y	0	0	1	1	1	1	X07	Costing 2014-2015	Dandenong	7900000	8700000	42057.8	42074.5	17	20289.1
3561669	35	4.2	0.761719	1	13	0	0	0	0	0	0	0	0	0	0	0	1		0	0	0.26345	Female	Private residence/accommodation	O63Z	Tuesday	N	0	0	1	0	1	1	O63	Costing 2014-2015	Dandenong	4700000	8700000	42045	42045.8	1	1236.04
3572805	53	4.2	2.00781	1	13	0	0	0	0	0	0	0	0	0	0	0	1		0	0	2	Male	Private residence/accommodation	D05Z	Friday	N	0	0	1	0	1	1	D05	Costing 2014-2015	Dandenong	2100000	8700000	42060.5	42062.5	2	9854.87
3561634	60	4.2	3.16016	0	13	0	0	0	0	0	0	0	0	0	0	0	1		0	0	3.16667	Female	Private residence/accommodation	N04B	Friday	Y	0	0	1	0	1	1	N04	Costing 2014-2015	Dandenong	2400000	8700000	42045.3	42048.5	3	7969.45
3575565	87	4.2	11.2148	1	13	0	0	0	0	0	0	0	0	0	0	0	1		0	0	11.2083	Female	Private residence/accommodation	J08A	Friday	Y	0	0	1	1	1	1	J08	Costing 2014-2015	Dandenong	2000000	8700000	42065.3	42076.5	11	15842.5
3566254	29	4.2	0.921875	0	13	0	0	0	0	0	0	0	0	0	0	0	1		0	0	1.37875	Female	Private residence/accommodation	J64B	Tuesday	N	0	0	1	0	1	1	J64	Costing 2014-2015	Dandenong	7900000	8700000	42051.7	42052.6	1	1218.63
3578874	38	4.2	2.8125	0	13	0	0	0	0	0	0	0	0	0	0	0	1		0	0	3.6535	Male	Private residence/accommodation	X06A	Sunday	N	0	0	1	1	1	1	X06	Costing 2014-2015	Dandenong	7100000	8700000	42068.8	42071.6	3	3753.75
3564675	57	4.2	2.69141	0	13	0	0	0	0	0	0	0	0	0	0	0	1		0	0	2.69672	Male	Private residence/accommodation	J64B	Monday	N	0	0	1	0	1	1	J64	Costing 2014-2015	Dandenong	370989	8700000	42048.7	42051.4	3	3167.46
3565367	71	4.2	0.25	1	13	0	0	0	0	0	0	0	0	0	0	0	1		0	0	0.191558	Male	Left against Medical Advice	J64B	Saturday	N	0	0	1	0	1	1	J64	Costing 2014-2015	Dandenong	4200000	8700000	42049.5	42049.8	1	351.226
3560995	82	4.2	1.17578	0	13	0	0	0	0	0	0	0	0	0	0	0	1		0	0	1.20833	Female	Private residence/accommodation	J08B	Tuesday	N	0	0	1	0	1	1	J08	Costing 2014-2015	Dandenong	4300000	8700000	42044.3	42045.5	1	3984.95
3572875	44	4.2	0.242188	0	13	0	0	0	0	0	0	0	0	0	0	0	1		0	0	0.25	Female	Private residence/accommodation	I19B	Wednesday	N	0	0	1	0	1	1	I19	Costing 2014-2015	Dandenong	710778	8700000	42060.7	42061	1	2951.26
3563262	52	4.2	15.3438	1	13	0	0	0	0	0	0	0	0	0	0	0	1		10.0076	14411	5.36736	Female	Private residence/accommodation	J14Z	Friday	N	0	0	1	0	1	1	J14	Costing 2014-2015	Dandenong	270485	8700000	42047.3	42062.6	15	25505.6
3573736	33	4.2	1.31641	1	13	0	0	0	0	0	0	0	0	0	0	0	1		0	0	1.29167	Female	Private residence/accommodation	N07A	Saturday	N	0	0	1	1	1	1	N07	Costing 2014-2015	Dandenong	780959	8700000	42062.3	42063.6	1	5125.17
3578823	56	4.2	0.394531	1	13	0	0	0	0	0	0	0	0	0	0	0	1		0	0	0.217453	Female	Private residence/accommodation	X60B	Friday	N	0	0	1	0	1	1	X60	Costing 2014-2015	Dandenong	811541	8700000	42069.1	42069.5	1	479.121
3572799	59	4.2	8.14453	0	13	0	0	0	0	0	0	0	0	0	0	0	1		0	0	8.16667	Female	Statistical Separation	N04B	Thursday	Y	0	0	1	0	1	1	N04	Costing 2014-2015	Dandenong	4300000	8700000	42060.5	42068.6	8	15353.4
3572913	61	4.2	13.4219	1	13	0	0	0	0	0	0	0	0	0	0	0	1		7.32292	10545	6.13542	Female	Private residence/accommodation	J01B	Wednesday	Y	0	0	1	0	1	1	J01	Costing 2014-2015	Dandenong	2000000	8700000	42061.3	42074.7	13	23034.6
3570697	74	4.2	1.16016	0	13	0	0	0	0	0	0	0	0	0	0	0	1		0	0	1.16667	Male	Private residence/accommodation	J08B	Tuesday	N	0	0	1	0	1	1	J08	Costing 2014-2015	Dandenong	2400000	8700000	42058.3	42059.5	1	4626.02
3574177	63	4.2	0.171875	0	13	0	0	0	0	0	0	0	0	0	0	0	1		0	0	0.208333	Male	Private residence/accommodation	X60B	Friday	N	0	0	1	0	1	1	X60	Costing 2014-2015	Dandenong	7900000	8700000	42062.5	42062.7	1	296.615
3560322	57	4.2	3.26563	0	13	0	0	0	0	0	0	0	0	0	0	0	1		0	0	8.22989	Male	Other acute hosp/ext care/rehab/geri ctr	E62A	Tuesday	N	0	0	1	1	1	1	E62	Costing 2014-2015	Dandenong	436528	8700000	42042.6	42045.9	3	9099.4
3566623	81	4.2	13.4219	1	13	0	0	0	0	0	0	0	0	0	0	0	1		0	0	13.4167	Female	Private residence/accommodation	J08A	Monday	Y	0	0	1	1	1	1	J08	Costing 2014-2015	Dandenong	2100000	8700000	42052.3	42065.7	13	16069
3568383	44	4.2	4.98047	0	13	0	0	0	0	0	0	0	0	0	0	0	1		0	0	5	Female	Private residence/accommodation	N04B	Tuesday	Y	0	0	1	0	1	1	N04	Costing 2014-2015	Dandenong	4500000	8700000	42054.4	42059.4	5	10956.3
3562239	74	4.2	5.64844	0	13	0	0	0	0	0	0	1	1	0	0	0	1		0	0	7.37001	Female	Other acute hosp/ext care/rehab/geri ctr	I78A	Monday	Y	1	0	1	1	1	1	I78	Costing 2014-2015	Dandenong	2400000	8700000	42045.9	42051.6	6	8919.75
3563733	93	4.2	6.92578	1	13	0	0	0	0	0	0	0	0	0	0	0	1		0	0	6.91667	Female	Other acute hosp/ext care/rehab/geri ctr	X07A	Thursday	Y	0	0	1	1	1	1	X07	Costing 2014-2015	Dandenong	7700000	8700000	42047.6	42054.6	7	8818.88
3560541	67	4.2	53.0039	0	13	0	0	0	0	0	0	0	0	0	0	0	1		9.98056	14372	22.6868	Female	Private residence/accommodation	I02A	Wednesday	Y	0	0	1	1	1	1	I02
3568653	67	4.2	2.00781	1	13	0	0	0	0	0	0	0	0	0	0	0	1		0	0	2	Male	Private residence/accommodation	C11Z	Saturday	N	0	0	1	0	1	1	C11	Costing 2014-2015	Dandenong	7900000	8700000	42054.4	42056.4	2	3477.55
3569503	41	4.2	5.17969	1	13	0	0	0	0	0	0	0	0	0	0	0	1		0	0	5.16667	Female	Private residence/accommodation	N04A	Wednesday	N	0	0	1	1	1	1	N04	Costing 2014-2015	Dandenong	2200000	8700000	42055.4	42060.6	5	10570
3568816	35	4.2	0.097656	0	13	0	0	0	0	0	0	0	0	0	0	0	1		0	0	0.963204	Male	Private residence/accommodation	X60B	Friday	N	0	0	1	0	1	1	X60	Costing 2014-2015	Dandenong	4100000	8700000	42054.9	42055	1	412.818
3561872	44	4.2	2.98438	0	13	0	0	0	0	0	0	0	0	0	0	0	1		0	0	3	Male	Private residence/accommodation	H07B	Friday	N	0	0	1	0	1	1	H07	Costing 2014-2015	Dandenong	7200000	8700000	42045.4	42048.4	3	26731.4
3571973	67	4.2	1.19141	0	13	0	0	0	0	0	0	0	0	0	0	0	1		0	0	1.20833	Male	Private residence/accommodation	D04Z	Wednesday	N	0	0	1	0	1	1	D04	Costing 2014-2015	Dandenong	4100000	8700000	42059.4	42060.5	1	4057.31
3568877	26	4.2	4.26172	0	13	0	0	0	0	0	0	0	0	0	0	0	1		0	0	4.76155	Male	Private residence/accommodation	I12B	Tuesday	N	0	0	1	0	1	1	I12	Costing 2014-2015	Dandenong	7900000	8700000	42055.2	42059.5	4	7349.22
3574427	78	4.2	46.9805	1	13	0	0	0	0	0	0	0	0	0	0	0	1		34.8535	50189	6.47754	Female	Private residence/accommodation	I68A	Wednesday	Y	0	0	1	1	1	1	I68
3577188	21	4.2	1.62891	1	13	0	0	0	0	0	0	0	0	1	0	0	1		0	0	1.07881	Female	Private residence/accommodation	N62Z	Thursday	N	0	0	1	0	1	1	N62	Costing 2014-2015	Dandenong	2400000	8700000	42067.2	42068.8	1	2127.05
3575345	32	4.2	0.082031	0	13	0	0	0	0	0	0	0	0	1	0	0	1		0	0	0.083333	Male	Left against Medical Advice	D66C	Sunday	N	0	0	1	0	1	1	D66	Costing 2014-2015	Dandenong	729383	8700000	42064.5	42064.6	1	230.533
3560865	71	4.2	16.4375	0	13	0	0	0	0	0	0	0	0	0	0	0	1		0	0	16.4583	Male	Private residence/accommodation	A06A	Wednesday	Y	0	0	1	1	1	1	A06	Costing 2014-2015	Dandenong	2300000	8700000	42044.3	42060.7	16	54681.6
3562698	48	4.2	3.99609	0	13	0	0	0	0	0	0	0	0	0	0	0	1		0	0	4	Female	Private residence/accommodation	N04A	Sunday	Y	0	0	1	1	1	1	N04	Costing 2014-2015	Dandenong	4100000	8700000	42046.4	42050.4	4	10737.6
3571902	25	4.2	2.82031	1	13	0	0	0	0	0	0	0	0	0	0	0	1		0	0	2.79167	Male	Private residence/accommodation	D14B	Friday	N	0	0	1	0	1	1	D14	Costing 2014-2015	Dandenong	7500000	8700000	42059.7	42062.5	3	6691.99
3575792	80	4.2	11.0508	1	13	0	0	0	0	0	0	0	0	0	0	0	1		0	0	11.0417	Male	Other acute hosp/ext care/rehab/geri ctr	J01A	Friday	Y	0	0	1	1	1	1	J01	Costing 2014-2015	Dandenong	2300000	8700000	42065.5	42076.5	11	23636.4
3570112	90	4.2	3.88672	0	13	0	0	0	0	0	0	0	0	0	0	0	1		0	0	9.48359	Female	Aged care residential facility	X63A	Wednesday	N	0	0	1	1	1	1	X63	Costing 2014-2015	Dandenong	7900000	8700000	42056.8	42060.7	4	4088.25
3571311	51	4.2	6.25781	0	13	0	0	0	0	0	0	0	0	0	0	0	1		0	0	6.29167	Female	Private residence/accommodation	J01A	Monday	Y	0	0	1	1	1	1	J01	Costing 2014-2015	Dandenong	7900000	8700000	42059.3	42065.5	6	23171.2
3588655	25	3.6	0.210938	1	14	0	0	0	0	0	0	0	0	0	0	0	1		0	0	0.208333	Female	Private residence/accommodation	G66B	Friday	N	0	0	1	0	1	1	G66	Costing 2014-2015	Dandenong	7900000	8700000	42083.5	42083.7	1	445.282
3585224	30	3.6	0.574219	1	14	0	0	0	0	0	0	0	0	0	0	0	1		0	0	0.247463	Female	Private residence/accommodation	N62Z	Monday	N	0	0	1	0	1	1	N62	Costing 2014-2015	Dandenong	7900000	8700000	42079.1	42079.7	1	781.354
3592905	70	3.6	0.898438	0	14	0	0	0	0	0	0	0	0	0	0	0	1		0	0	1.81595	Male	Private residence/accommodation	Y62B	Tuesday	N	0	0	1	0	1	1	Y62	Costing 2014-2015	Dandenong	7900000	8700000	42086.7	42087.6	1	1078.49
3584718	41	3.6	1.80078	1	14	0	0	0	0	0	0	0	0	0	0	0	1		0	0	1.79167	Male	Private residence/accommodation	D40Z	Monday	N	0	0	1	0	1	1	D40	Costing 2014-2015	Dandenong	2400000	8700000	42077.7	42079.5	2	4872.98
3592331	39	3.6	9.06641	1	14	0	0	0	0	0	0	0	0	0	0	0	1		0	0	1.13417	Male	Statistical Separation	X60B	Monday	Y	0	0	1	0	1	1	X60	Costing 2014-2015	Dandenong	4600000	8700000	42084.6	42093.7	9	9080.36
3591603	34	3.6	0.839844	0	14	0	0	0	0	0	0	0	0	0	0	0	1		0	0	1.47875	Male	Private residence/accommodation	X06B	Friday	N	0	0	1	0	1	1	X06	Costing 2014-2015	Dandenong	4300000	8700000	42090	42090.8	1	2856.13
3589878	64	3.6	5.02344	0	14	0	0	0	0	0	0	0	0	0	0	0	1		0	0	5.04167	Female	Private residence/accommodation	D02A	Monday	Y	0	0	1	1	1	1	D02	Costing 2014-2015	Dandenong	4200000	8700000	42088.5	42093.5	5	12501.9
3592131	74	3.6	1.85938	1	14	0	0	0	0	0	0	0	0	0	0	0	1		0	0	1.83333	Male	Private residence/accommodation	I27A	Sunday	N	0	0	1	1	1	1	I27	Costing 2014-2015	Dandenong	7300000	8700000	42083.9	42085.8	2	3903.35
3590820	56	3.6	2.19922	0	14	0	0	0	0	0	0	0	0	0	0	0	1		0	0	2.20833	Female	Private residence/accommodation	X06B	Thursday	Y	0	0	1	0	1	1	X06	Costing 2014-2015	Dandenong	2200000	8700000	42087.3	42089.5	2	4581.26
3591515	52	3.6	5.32031	0	14	0	0	0	0	0	0	0	0	0	0	0	1		0	0	5.33333	Male	Private residence/accommodation	J01A	Wednesday	N	0	0	1	1	1	1	J01
3593554	18	3.6	11.1406	1	14	0	0	0	0	0	0	0	0	0	0	0	1		0	0	11.125	Female	Private residence/accommodation	A06C	Friday	Y	0	0	1	0	1	1	A06
3593537	67	3.6	1.61328	0	14	0	0	0	0	0	0	0	0	0	0	0	1		0	0	4.46068	Male	Private residence/accommodation	I72B	Tuesday	N	0	0	1	0	1	1	I72	Costing 2014-2015	Dandenong	2100000	8700000	42085.8	42087.5	2	3223.64
3593073	54	3.6	4.17188	1	14	0	0	0	0	0	0	0	0	0	0	0	1		0	0	4.16667	Female	Other acute hosp/ext care/rehab/geri ctr	J06A	Saturday	Y	0	0	1	1	1	1	J06	Costing 2014-2015	Dandenong	7900000	8700000	42087.3	42091.5	4	11686.9
3585504	44	3.6	0.828125	0	14	0	0	0	0	0	0	0	0	0	0	0	1		0	0	0.833333	Female	Private residence/accommodation	O05Z	Tuesday	N	0	0	1	0	1	1	O05	Costing 2014-2015	Dandenong	831650	8700000	42079.5	42080.3	1	2888.57
3580437	33	3.6	1.46875	0	14	0	0	0	0	0	0	0	0	0	0	0	1		0	0	3.00488	Male	Private residence/accommodation	I28A	Tuesday	N	0	0	1	1	1	1	I28	Costing 2014-2015	Dandenong	7000000	8700000	42071.8	42073.3	2	2847.1
3585867	58	3.6	2.10547	0	14	0	0	0	0	0	0	0	0	0	0	0	1		0	0	5.68458	Male	Private residence/accommodation	J60B	Wednesday	N	0	0	1	0	1	1	J60	Costing 2014-2015	Dandenong	7900000	8700000	42079.6	42081.7	2	2582.15
3586568	48	3.6	2.91016	0	14	0	0	0	0	0	0	0	0	0	0	0	1		0	0	3.15597	Male	Private residence/accommodation	X02A	Friday	N	0	0	1	1	1	1	X02	Costing 2014-2015	Dandenong	7700000	8700000	42080.7	42083.7	3	13830.8
3593938	60	3.6	1.91797	1	14	0	0	0	0	0	0	0	0	0	0	0	1		0	0	1.91667	Female	Private residence/accommodation	E62A	Sunday	N	0	0	1	1	1	1	E62	Costing 2014-2015	Dandenong	2000000	8700000	42090.8	42092.7	2	4841.1
3587107	46	3.6	1.09375	0	14	0	0	0	0	0	0	0	0	0	0	0	1		0	0	1.125	Female	Private residence/accommodation	J07B	Thursday	N	0	0	1	0	1	1	J07	Costing 2014-2015	Dandenong	777721	8700000	42081.5	42082.5	1	3649.88
3592612	51	3.6	1.23047	1	14	0	0	0	0	0	0	0	0	0	0	0	1		0	0	1.20833	Male	Private residence/accommodation	C05Z	Tuesday	N	0	0	1	0	1	1	C05	Costing 2014-2015	Dandenong	4600000	8700000	42086.3	42087.5	1	5300.46
3590482	44	3.6	7.23047	0	14	0	0	0	0	0	0	0	0	0	0	0	1		0	0	7.25	Female	Private residence/accommodation	J01B	Thursday	Y	0	0	1	0	1	1	J01
3588373	82	3.6	4.50781	1	14	0	0	0	1	0	0	0	1	0	0	0	1		0	0	4.5	Female	Left against Medical Advice	N04A	Tuesday	Y	1	0	1	1	1	1	N04	Costing 2014-2015	Dandenong	4700000	8700000	42083.3	42087.8	4	9190.88
3586105	76	3.6	2.15625	0	14	0	0	0	0	0	0	0	0	0	0	0	1		0	0	2.16667	Female	Private residence/accommodation	B07B	Thursday	N	0	0	1	0	1	1	B07	Costing 2014-2015	Dandenong	4100000	8700000	42080.3	42082.4	2	6995.57
3590349	91	3.6	6.15234	1	14	0	0	0	0	0	0	0	0	0	0	0	1		0	0	6.125	Female	Private residence/accommodation	J08A	Tuesday	Y	0	0	1	1	1	1	J08	Costing 2014-2015	Dandenong	2000000	8700000	42088.5	42094.6	6	7929.12
3587264	71	3.6	3.03125	0	14	0	0	0	0	0	0	0	0	0	0	0	1		0	0	4.02629	Male	Private residence/accommodation	H08B	Saturday	N	0	0	1	0	1	1	H08	Costing 2014-2015	Dandenong	7500000	8700000	42081.5	42084.6	3	9083.06
3582164	21	3.6	0.988281	1	14	0	0	0	0	0	0	0	0	1	0	0	1		0	0	0.958333	Male	Private residence/accommodation	D02C	Thursday	N	0	0	1	0	1	1	D02	Costing 2014-2015	Dandenong	4700000	8700000	42074.5	42075.4	1	4859.7
3592522	32	3.6	1.83984	1	14	0	0	0	0	0	0	0	0	0	0	0	1		0	0	1.83333	Male	Private residence/accommodation	D12B	Tuesday	N	0	0	1	0	1	1	D12	Costing 2014-2015	Dandenong	7100000	8700000	42085.7	42087.5	2	3200.09
3589388	44	3.6	1.00781	1	14	0	0	0	0	0	0	0	0	0	0	0	1		0	0	1	Male	Private residence/accommodation	D14B	Wednesday	N	0	0	1	0	1	1	D14	Costing 2014-2015	Dandenong	7900000	8700000	42087.5	42088.5	1	3453.14
3590887	66	3.6	0.449219	0	14	0	0	0	0	0	0	0	0	0	0	0	1		0	0	0.458333	Male	Private residence/accommodation	J08C	Thursday	N	0	0	1	0	1	1	J08	Costing 2014-2015	Dandenong	2200000	8700000	42089.3	42089.8	1	2654.88
3581052	41	3.6	6.21875	0	14	0	0	0	1	0	0	0	1	0	0	0	1		0	0	6.25	Female	Private residence/accommodation	J01B	Monday	Y	1	0	1	0	1	1	J01	Costing 2014-2015	Dandenong	2500000	8700000	42073.3	42079.5	6	26155.5
3591991	52	3.6	9.10547	0	14	0	0	0	1	0	0	0	1	0	0	0	1		0	0	9.125	Female	Private residence/accommodation	N04A	Sunday	Y	1	0	1	1	1	1	N04
3580346	42	3.6	5.10938	1	14	0	0	0	0	0	0	0	0	1	0	0	1		0	0	2.24807	Female	Private residence/accommodation	N62Z	Friday	N	0	0	1	0	1	1	N62	Costing 2014-2015	Dandenong	4500000	8700000	42071.4	42076.6	5	8039.48
3589007	20	3.6	1.01953	1	14	0	0	0	0	0	0	0	0	0	0	0	1		0	0	1	Female	Private residence/accommodation	N08Z	Saturday	N	0	0	1	0	1	1	N08	Costing 2014-2015	Dandenong	4600000	8700000	42083.5	42084.5	1	4562
3594801	40	3.6	3.17188	1	14	0	0	0	0	0	0	0	0	0	0	0	1		0	0	3.16667	Female	Private residence/accommodation	N04B	Thursday	Y	0	0	1	0	1	1	N04
3587482	45	3.6	0.9375	1	14	0	0	0	0	0	0	0	0	0	0	0	1		0	0	0.916667	Female	Private residence/accommodation	N07A	Thursday	N	0	0	1	1	1	1	N07	Costing 2014-2015	Dandenong	456905	8700000	42081.5	42082.4	1	3658.71
3593968	85	3.6	3.93359	0	14	0	0	0	0	0	0	0	0	0	0	0	1		0	0	11.3938	Female	Other acute hosp/ext care/rehab/geri ctr	I08A	Tuesday	Y	0	0	1	1	1	1	I08	Costing 2014-2015	Dandenong	313858	8700000	42090.9	42094.8	4	5893.87
3592260	44	3.6	1.52734	1	14	0	0	0	0	0	0	0	0	0	0	0	1		0	0	1.19272	Female	Private residence/accommodation	N09Z	Sunday	N	0	0	1	0	1	1	N09	Costing 2014-2015	Dandenong	760271	8700000	42084.2	42085.7	1	3136.65
3588146	21	3.6	13.0117	0	14	0	0	0	0	0	0	0	0	0	0	0	1		1.89583	2730	11.1458	Male	Other acute hosp/ext care/rehab/geri ctr	T01A	Wednesday	N	0	0	1	1	1	1	T01
3595116	62	3.6	8.39453	0	14	0	0	0	0	0	0	0	0	0	0	0	1		3.37917	4866	5.0375	Male	Private residence/accommodation	J12B	Tuesday	Y	0	0	1	0	1	1	J12
3586186	67	3.6	1.19531	0	14	0	0	0	0	0	0	0	0	1	0	0	1		0	0	1.20833	Male	Private residence/accommodation	J12B	Wednesday	N	0	0	1	0	1	1	J12	Costing 2014-2015	Dandenong	414725	8700000	42080.3	42081.5	1	4699.73
3586146	78	3.6	1.16797	1	14	0	0	0	0	0	0	0	0	0	0	0	1		0	0	1.16667	Male	Private residence/accommodation	J10Z	Wednesday	N	0	0	1	0	1	1	J10	Costing 2014-2015	Dandenong	7900000	8700000	42080.4	42081.5	1	4033.76
3581499	91	3.6	5.0625	1	14	0	0	1	0	0	0	0	1	0	0	0	1		0	0	5.04167	Female	Private residence/accommodation	X07B	Sunday	Y	1	0	1	0	1	1	X07	Costing 2014-2015	Dandenong	4400000	8700000	42073.5	42078.6	5	6628.56
3594412	66	3.6	4.00781	1	14	0	0	0	0	0	0	0	0	0	0	0	1		0	0	4	Male	Private residence/accommodation	X06A	Wednesday	N	0	0	1	1	1	1	X06
3583800	46	3.6	1.05859	0	14	0	0	0	0	0	0	0	0	0	0	0	1		0	0	1.08333	Female	Private residence/accommodation	J11Z	Saturday	N	0	0	1	0	1	1	J11	Costing 2014-2015	Dandenong	2400000	8700000	42076.5	42077.5	1	6002.62
3585278	35	3.6	2.41406	1	14	0	0	0	0	0	0	0	0	0	0	0	1		0	0	2.375	Female	Private residence/accommodation	B07B	Wednesday	Y	0	0	1	0	1	1	B07	Costing 2014-2015	Dandenong	4600000	8700000	42079.3	42081.7	2	8553.91
3580839	75	3.6	0.296875	1	14	0	0	0	0	0	0	0	0	0	0	0	1		0	0	0.291667	Male	Private residence/accommodation	X06B	Monday	N	0	0	1	0	1	1	X06	Costing 2014-2015	Dandenong	4300000	8700000	42072.5	42072.8	1	1055.77
3580121	19	3.6	1.87891	1	14	0	0	0	0	0	0	0	0	0	0	0	1		0	0	1.376	Male	Private residence/accommodation	X06B	Monday	N	0	0	1	0	1	1	X06	Costing 2014-2015	Dandenong	7900000	8700000	42070.7	42072.6	2	2690.11
3582912	68	3.6	5.24609	0	14	0	0	0	0	0	0	0	0	0	0	0	1		0	0	5.25	Male	Private residence/accommodation	J64B	Tuesday	N	0	0	1	0	1	1	J64	Costing 2014-2015	Dandenong	440637	8700000	42075.2	42080.5	5	5931.49
3585372	24	3.6	2.53906	0	14	0	0	0	0	0	0	0	0	0	0	0	1		0	0	2.54167	Male	Left against Medical Advice	H62B	Wednesday	N	0	0	1	0	1	1	H62	Costing 2014-2015	Dandenong	871282	8700000	42079.3	42081.8	2	3542.12
3586059	72	3.6	1.30469	0	14	0	0	0	0	0	0	0	0	0	0	0	1		0	0	3.97534	Male	Other acute hosp/ext care/rehab/geri ctr	F75B	Wednesday	N	0	0	1	0	1	1	F75	Costing 2014-2015	Dandenong	312297	8700000	42080	42081.3	2	1717.2
3590381	30	3.6	0.988281	0	14	0	0	0	0	0	0	0	0	0	0	0	1		0	0	1	Female	Private residence/accommodation	N07A	Thursday	N	0	0	1	1	1	1	N07	Costing 2014-2015	Dandenong	4700000	8700000	42088.5	42089.5	1	6392.62
3589904	48	3.6	0.3125	1	14	0	0	0	0	0	0	0	0	1	0	0	1		0	0	0.291667	Female	Private residence/accommodation	I30Z	Wednesday	N	0	0	1	0	1	1	I30	Costing 2014-2015	Dandenong	4000000	8700000	42088.5	42088.8	1	2123.29
3583453	73	3.6	1.25781	0	14	0	0	0	0	0	0	0	0	0	0	0	1		0	0	1.29167	Female	Private residence/accommodation	N05B	Saturday	N	0	0	1	0	1	1	N05	Costing 2014-2015	Dandenong	2100000	8700000	42076.3	42077.5	1	4389.1
3583250	23	3.6	4.8125	0	14	0	0	0	0	0	0	0	0	0	0	0	1		0	0	4.83333	Female	Private residence/accommodation	G66A	Tuesday	Y	0	0	1	1	1	1	G66	Costing 2014-2015	Dandenong	412991	8700000	42075.8	42080.6	5	5975.66
3591487	43	3.6	3.19922	1	14	0	0	0	0	0	0	0	0	0	0	0	1		0	0	3.16667	Male	Private residence/accommodation	D04Z	Thursday	N	0	0	1	0	1	1	D04	Costing 2014-2015	Dandenong	7900000	8700000	42086.3	42089.5	3	11044.6
3587599	36	3.6	2.64063	0	14	0	0	0	0	0	0	0	0	0	0	0	1		0	0	2.91185	Male	Private residence/accommodation	H62B	Saturday	N	0	0	1	0	1	1	H62	Costing 2014-2015	Dandenong	4200000	8700000	42081.9	42084.5	3	3025.01
3595550	38	3.6	2.89844	0	14	0	0	0	0	0	0	0	0	0	0	0	1		0	0	6.92804	Female	Private residence/accommodation	X06A	Thursday	N	0	0	1	1	1	1	X06
3590046	89	3.6	7.10938	0	14	1	0	0	0	0	0	0	0	1	0	0	1		0	0	7.125	Female	Death	X07A	Wednesday	Y	0	0	1	1	1	1	X07
3590463	21	3.6	2.25	1	14	0	0	0	0	0	0	0	0	0	0	0	1		0	0	2.06439	Male	Private residence/accommodation	T61B	Wednesday	N	0	0	1	0	1	1	T61	Costing 2014-2015	Dandenong	4700000	8700000	42086.5	42088.8	2	2979.08
3582580	44	3.6	0.414063	0	14	0	0	0	0	0	0	0	0	0	0	0	1		0	0	0.416667	Male	Private residence/accommodation	X05B	Wednesday	N	0	0	1	0	1	1	X05	Costing 2014-2015	Dandenong	7900000	8700000	42074.5	42074.9	1	2426.31
3592535	28	3.6	0.855469	1	14	0	0	0	0	0	0	0	0	0	0	0	1		0	0	0.190246	Female	Private residence/accommodation	O66B	Monday	N	0	0	1	0	1	1	O66	Costing 2014-2015	Dandenong	4300000	8700000	42085.6	42086.4	1	1332.87
3585746	80	3.6	9.21094	1	14	0	0	0	0	0	0	0	0	0	0	0	1		0	0	9.20833	Male	Private residence/accommodation	J08A	Wednesday	Y	0	0	1	1	1	1	J08	Costing 2014-2015	Dandenong	468600	8700000	42079.3	42088.5	9	32556.7
3590088	19	3.6	2.55469	0	14	0	0	0	0	0	0	0	0	0	0	0	1		0	0	3.2078	Male	Private residence/accommodation	X04A	Wednesday	N	0	0	1	1	1	1	X04	Costing 2014-2015	Dandenong	7300000	8700000	42085.8	42088.4	3	4457.55
3586015	41	3.6	14.4297	1	14	0	0	1	0	0	0	0	1	1	0	0	1		0	0	13.8385	Male	Left against Medical Advice	K01A	Tuesday	Y	1	0	1	1	1	1	K01	Costing 2014-2015	Dandenong	4600000	8700000	42080.2	42094.6	14	23295.4
3594659	64	3.6	1.14844	0	14	0	0	0	0	0	0	0	0	0	0	0	1		0	0	1.82852	Male	Private residence/accommodation	J64B	Monday	N	0	0	1	0	1	1	J64	Costing 2014-2015	Dandenong	355608	8700000	42092.6	42093.7	1	2025.37
3587487	34	3.6	1.09766	0	14	0	0	0	0	0	0	0	0	0	0	0	1		0	0	1.125	Female	Private residence/accommodation	J06B	Thursday	N	0	0	1	0	1	1	J06	Costing 2014-2015	Dandenong	7200000	8700000	42081.5	42082.6	1	5726.76
3593464	20	3.6	0.582031	1	14	0	0	0	0	0	0	0	0	1	0	0	1		0	0	0.541667	Male	Private residence/accommodation	I27C	Sunday	N	0	0	1	0	1	1	I27	Costing 2014-2015	Dandenong	4700000	8700000	42085.2	42085.8	1	2332.11
3586747	46	3.6	1.19922	0	14	0	0	0	0	0	0	0	0	0	0	0	1		0	0	1.20833	Female	Private residence/accommodation	N07A	Thursday	N	0	0	1	1	1	1	N07	Costing 2014-2015	Dandenong	870948	8700000	42081.3	42082.5	1	4888.88
3589365	74	3.6	1.13672	1	14	0	0	0	0	0	0	0	0	0	0	0	1		0	0	1.125	Male	Private residence/accommodation	D02B	Wednesday	N	0	0	1	0	1	1	D02	Costing 2014-2015	Dandenong	4600000	8700000	42087.4	42088.6	1	5307.93
3591542	71	3.6	5.79297	0	14	0	0	0	0	0	0	0	0	0	0	0	1		0	0	11.7205	Female	Private residence/accommodation	X07A	Wednesday	N	0	0	1	1	1	1	X07
3586208	40	3.6	0.625	0	14	0	0	0	0	0	0	0	0	0	0	0	1		0	0	0.625	Female	Private residence/accommodation	X60B	Tuesday	N	0	0	1	0	1	1	X60	Costing 2014-2015	Dandenong	1000000	8700000	42080.2	42080.9	1	3060.82
3584293	21	3.6	1.82422	1	14	0	0	0	0	0	0	0	0	0	0	0	1		0	0	1.25696	Male	Private residence/accommodation	D67A	Sunday	N	0	0	1	1	1	1	D67	Costing 2014-2015	Dandenong	2500000	8700000	42076.8	42078.6	2	1826.08
3580563	41	3.6	1.40234	1	14	0	0	0	0	0	0	0	0	0	0	0	1		0	0	1.375	Male	Private residence/accommodation	B07A	Tuesday	N	0	0	1	1	1	1	B07	Costing 2014-2015	Dandenong	4500000	8700000	42072	42073.4	2	3006.51
3587728	42	3.6	27.3906	1	14	0	0	0	1	0	0	0	1	0	0	0	1		23.0771	33231	4.33958	Female	Private residence/accommodation	J06B	Wednesday	Y	1	0	1	0	1	1	J06
3589952	22	3.6	0.894531	0	14	0	0	0	0	0	0	0	0	0	0	0	1		0	0	1.44494	Female	Private residence/accommodation	O03B	Thursday	N	0	0	1	0	1	1	O03	Costing 2014-2015	Dandenong	7900000	8700000	42088.6	42089.4	1	5068.36
3579899	77	3.6	1.23828	0	14	0	0	0	0	0	0	0	0	0	0	0	1		0	0	1.94056	Female	Private residence/accommodation	X63B	Sunday	N	0	0	1	0	1	1	X63	Costing 2014-2015	Dandenong	2000000	8700000	42070.5	42071.8	1	1315.47
3592391	53	3.6	2.83594	1	14	0	0	0	0	0	0	0	0	0	0	0	1		0	0	2.83333	Male	Private residence/accommodation	J08A	Tuesday	N	0	0	1	1	1	1	J08	Costing 2014-2015	Dandenong	2000000	8700000	42084.7	42087.5	3	4093.33
3582668	57	3.6	6.77734	1	14	0	0	0	0	0	0	0	0	0	0	0	1		0	0	2.37915	Female	Private residence/accommodation	K60B	Wednesday	Y	0	0	1	0	1	1	K60	Costing 2014-2015	Dandenong	4100000	8700000	42074.8	42081.5	7	8592.94
3592558	31	3.6	0.863281	0	14	0	0	0	0	0	0	0	0	0	0	0	1		0	0	1.37824	Male	Private residence/accommodation	B07B	Monday	N	0	0	1	0	1	1	B07	Costing 2014-2015	Dandenong	7900000	8700000	42085.8	42086.7	1	3184.16
3582846	66	3.6	17.4453	0	14	0	0	1	0	0	0	0	1	0	0	0	1		0	0	17.4583	Female	Other acute hosp/ext care/rehab/geri ctr	J01A	Sunday	Y	1	0	1	1	1	1	J01	Costing 2014-2015	Dandenong	2300000	8700000	42075.3	42092.8	17	26232
3590854	32	3.6	4	0	14	0	0	0	0	0	0	0	0	0	0	0	1		0	0	4	Female	Private residence/accommodation	N07A	Monday	N	0	0	1	1	1	1	N07	Costing 2014-2015	Dandenong	7900000	8700000	42089.3	42093.3	4	9250.17
3593060	47	3.6	3.32422	0	14	0	0	0	0	0	0	0	0	0	0	0	1		0	0	3.33333	Female	Private residence/accommodation	N04B	Friday	Y	0	0	1	0	1	1	N04	Costing 2014-2015	Dandenong	2400000	8700000	42087.3	42090.6	3	7397.87
3584793	32	3.6	1.44922	0	14	0	0	0	0	0	0	0	0	0	0	0	1		0	0	2.07037	Male	Private residence/accommodation	J08B	Monday	N	0	0	1	0	1	1	J08	Costing 2014-2015	Dandenong	2300000	8700000	42078	42079.5	1	2591.33
3593866	31	3.6	1.98438	1	14	0	0	0	0	0	0	0	0	0	0	0	1		0	0	1.25696	Female	Private residence/accommodation	D67A	Sunday	N	0	0	1	1	1	1	D67	Costing 2014-2015	Dandenong	4700000	8700000	42090.7	42092.7	2	2859.39
3582816	44	3.6	1.05078	1	14	0	0	0	1	0	0	0	1	0	0	0	1		0	0	0.969683	Female	Private residence/accommodation	O05Z	Thursday	N	1	0	1	0	1	1	O05	Costing 2014-2015	Dandenong	4600000	8700000	42074.8	42075.8	1	3560.63
3587732	39	3.6	1.32813	0	14	0	0	0	0	0	0	0	0	0	0	0	1		0	0	1.33333	Female	Private residence/accommodation	N07A	Friday	N	0	0	1	1	1	1	N07	Costing 2014-2015	Dandenong	2100000	8700000	42082.3	42083.6	1	7024.39
3582534	58	3.6	2.05078	0	14	0	0	0	0	0	0	0	0	0	0	0	1		0	0	2.08333	Female	Private residence/accommodation	K06B	Friday	Y	0	0	1	0	1	1	K06	Costing 2014-2015	Dandenong	4000000	8700000	42074.5	42076.5	2	6150.96
3592321	21	3.6	1.07422	1	14	0	0	0	0	0	0	0	0	0	0	0	1		0	0	1.00513	Female	Private residence/accommodation	O63Z	Sunday	N	0	0	1	0	1	1	O63	Costing 2014-2015	Dandenong	4300000	8700000	42084.6	42085.7	1	1572.02
3594753	69	3.6	1.75	0	14	0	0	0	0	0	0	0	0	0	0	0	1		0	0	1.75	Female	Private residence/accommodation	D40Z	Tuesday	N	0	0	1	0	1	1	D40	Costing 2014-2015	Dandenong	300007	8700000	42092.7	42094.5	2	3278.46
3580441	30	3.6	2.73438	1	14	0	0	0	0	0	0	0	0	0	0	0	1		0	0	1.77177	Male	Private residence/accommodation	G07B	Wednesday	N	0	0	1	0	1	1	G07	Costing 2014-2015	Dandenong	7900000	8700000	42071.8	42074.5	3	6112.65
3589189	54	3.6	4.58984	0	14	0	0	0	0	0	0	0	0	0	0	0	1		0	0	4.625	Female	Private residence/accommodation	X63A	Wednesday	Y	0	0	1	1	1	1	X63	Costing 2014-2015	Dandenong	2500000	8700000	42083.9	42088.5	5	7433.98
3581263	36	3.6	1.28906	0	14	0	0	0	0	0	0	0	0	0	0	0	1		0	0	1.29167	Male	Private residence/accommodation	I17A	Wednesday	N	0	0	1	1	1	1	I17	Costing 2014-2015	Dandenong	7900000	8700000	42073.3	42074.6	1	9547.08
3583948	55	3.6	5.87891	1	14	0	0	0	0	0	0	0	0	0	0	0	1		0	0	5.875	Female	Private residence/accommodation	X07A	Thursday	N	0	0	1	1	1	1	X07	Costing 2014-2015	Dandenong	2500000	8700000	42076.6	42082.5	6	6900.74
3589929	40	3.6	1.23438	0	14	0	0	0	0	0	0	0	0	0	0	0	1		0	0	3.15597	Female	Private residence/accommodation	X02A	Thursday	N	0	0	1	1	1	1	X02	Costing 2014-2015	Dandenong	4600000	8700000	42088.6	42089.8	1	4713.51
3585308	84	3.6	14.2695	1	14	0	0	1	2	0	0	0	3	0	0	0	1		0	0	14.25	Female	Statistical Separation	N06Z	Monday	Y	1	0	1	0	1	1	N06	Costing 2014-2015	Dandenong	2400000	8700000	42079.3	42093.6	14	17193.5
3583599	32	3.6	51.6289	1	14	0	0	0	0	0	0	0	0	0	0	0	1		0	0	12.147	Male	Private residence/accommodation	I12A	Sunday	Y	0	0	1	1	1	1	I12
3580615	52	3.6	2.23438	0	14	0	0	0	0	0	0	0	0	0	0	0	1		0	0	3.51202	Female	Private residence/accommodation	H08B	Wednesday	N	0	0	1	0	1	1	H08	Costing 2014-2015	Dandenong	7800000	8700000	42072.2	42074.5	2	6123.78
3583055	62	3.6	0.367188	0	14	0	0	0	0	0	0	0	0	0	0	0	1		0	0	0.375	Male	Private residence/accommodation	Y02C	Thursday	N	0	0	1	0	1	1	Y02	Costing 2014-2015	Dandenong	107438	8700000	42075.5	42075.9	1	2062.29
3580767	37	3.6	2.49219	0	14	0	0	0	0	0	0	0	0	0	0	0	1		0	0	2.5	Female	Private residence/accommodation	B07B	Wednesday	N	0	0	1	0	1	1	B07	Costing 2014-2015	Dandenong	4200000	8700000	42072.4	42074.9	2	6130.52
3586611	78	3.6	1.09375	1	14	0	0	0	0	0	0	0	0	0	0	0	1		0	0	1.08333	Male	Private residence/accommodation	J08B	Wednesday	N	0	0	1	0	1	1	J08	Costing 2014-2015	Dandenong	7500000	8700000	42080.4	42081.5	1	5098.21
3580236	30	3.6	0.324219	1	14	0	0	0	0	0	0	0	0	0	0	0	1		0	0	0.300405	Female	Private residence/accommodation	O05Z	Sunday	N	0	0	1	0	1	1	O05	Costing 2014-2015	Dandenong	4700000	8700000	42071.2	42071.5	1	1934.05
3587813	21	3.6	1.23047	0	14	0	0	0	0	0	0	0	0	0	0	0	1		0	0	2.03102	Male	Private residence/accommodation	I19B	Friday	N	0	0	1	0	1	1	I19	Costing 2014-2015	Dandenong	2500000	8700000	42082.4	42083.6	1	8490.11
3463425	23	4.8	11.4648	0	8	0	0	0	0	0	0	0	0	0	0	1	0		0	0	12.98	Male	Private residence/accommodation	G02A	Friday	Y	0	0	1	1	1	2	G02	Costing 2014-2015	Dandenong	2400000	8600000	41897	41908.4	12	22909.6
3457073	74	3.8	11.1328	0	8	0	0	2	0	0	0	0	2	1	0	1	0		0	0	11.1667	Female	Private residence/accommodation	G02A	Tuesday	Y	1	0	1	1	1	2	G02	Costing 2014-2015	Dandenong	7100000	8600000	41887.3	41898.4	11	20860.4
3472649	42	4.8	1.73438	1	8	0	0	0	0	0	0	0	0	0	0	1	0		0	0	1.67275	Male	Private residence/accommodation	G11Z	Tuesday	N	0	0	1	0	1	2	G11	Costing 2014-2015	Dandenong	4600000	8600000	41910.9	41912.6	2	3176.25
3454075	53	3.8	21.1719	1	8	0	0	0	0	0	0	1	1	0	0	1	0		0	0	15.3931	Male	Private residence/accommodation	G02A	Monday	Y	1	0	1	1	1	2	G02	Costing 2014-2015	Dandenong	1000000	8500000	41883.4	41904.6	21	48480.7
3459860	87	4.8	10.0313	1	8	0	0	0	0	0	0	1	1	0	0	1	0		0	0	10	Female	Private residence/accommodation	G01A	Friday	Y	1	0	1	1	1	2	G01	Costing 2014-2015	Dandenong	4200000	8600000	41891.6	41901.6	10	23231.4
3458370	23	4.8	1.52734	0	8	0	0	0	0	0	0	0	0	0	0	1	0		0	0	2.73432	Female	Private residence/accommodation	H62B	Monday	N	0	0	1	0	1	2	H62	Costing 2014-2015	Dandenong	4400000	8600000	41889.1	41890.6	1	1215.61
3474670	17	4.8	1.99219	0	8	0	0	0	1	0	0	0	1	1	0	1	0		0	0	2.28305	Female	Private residence/accommodation	G47B	Friday	N	1	0	1	0	1	2	G47	Costing 2014-2015	Dandenong	885514	8600000	41913.8	41915.8	2	5203.91
3469553	53	4.8	0.894531	1	8	0	0	0	0	0	0	0	0	0	0	1	0		0	0	0.875	Male	Other acute hosp/ext care/rehab/geri ctr	G12C	Wednesday	N	0	0	1	0	1	2	G12	Costing 2014-2015	Dandenong	7900000	8600000	41906	41906.9	1	8223.84
3470584	67	4.8	52.9961	1	8	0	0	0	0	0	0	0	0	0	0	1	0		4.11042	5919	15.1604	Female	Statistical Separation	G01A	Monday	Y	0	0	1	1	1	2	G01	Costing 2014-2015	Dandenong	864379	8600000	41907.4	41960.4	28	43154.2
3460702	70	4.8	7.69922	1	8	0	0	0	0	0	0	0	0	0	0	1	0		0	0	2.41986	Female	Other acute hosp/ext care/rehab/geri ctr	G60B	Thursday	N	0	0	1	0	1	2	G60	Costing 2014-2015	Dandenong	183519	8600000	41892.6	41900.3	8	6184.63
3456270	76	3.8	3.37109	1	8	0	0	0	0	0	0	0	0	0	0	1	0		0	0	3.33332	Male	Private residence/accommodation	H62B	Sunday	N	0	0	1	0	1	2	H62	Costing 2014-2015	Dandenong	7700000	8600000	41886.1	41889.4	3	2701.37
3459800	66	4.8	22.9648	1	8	0	0	0	0	0	0	0	0	0	0	1	0		13.9361	20068	9.02222	Male	Private residence/accommodation	Z63A	Thursday	Y	0	0	1	1	1	2	Z63	Costing 2014-2015	Dandenong	4100000	8600000	41891.5	41914.5	15	11808.6
3463289	20	4.8	5.13672	1	8	0	0	0	0	0	0	0	0	1	0	1	0		0	0	5.125	Male	Private residence/accommodation	G05B	Saturday	N	0	0	1	0	1	2	G05	Costing 2014-2015	Dandenong	765441	8600000	41897.3	41902.4	5	7458.46
3462381	63	4.8	10.1484	1	8	0	0	0	0	0	0	1	1	0	0	1	0		0	0	5.91868	Male	Private residence/accommodation	H62A	Monday	Y	1	0	1	1	1	2	H62	Costing 2014-2015	Dandenong	4400000	8600000	41894.5	41904.6	10	11825.1
3457578	87	3.8	6.59766	1	8	0	0	0	0	0	0	0	0	0	0	1	0		0	0	1.92015	Male	Private residence/accommodation	G70B	Friday	N	0	0	1	0	1	2	G70	Costing 2014-2015	Dandenong	449802	8600000	41887.8	41894.4	7	5587.62
3477438	59	4.8	24.8945	0	8	0	0	0	0	0	0	0	0	0	0	1	0		0	0	24.9167	Male	Other acute hosp/ext care/rehab/geri ctr	G46A	Monday	Y	0	0	1	1	1	2	G46	Costing 2014-2015	Dandenong	2400000	8600000	41914.7	41939.6	25	27232.1
3475132	53	4.8	4.54297	1	8	0	0	0	0	0	0	0	0	0	0	1	0		0	0	4.54167	Male	Private residence/accommodation	Q61B	Sunday	Y	0	0	1	0	1	2	Q61	Costing 2014-2015	Dandenong	7900000	8600000	41912.9	41917.4	5	4274.13
3458785	64	4.8	5.29688	1	8	0	0	0	0	0	0	0	0	0	0	1	0		0	0	5.29167	Female	Private residence/accommodation	G04A	Saturday	Y	0	0	1	1	1	2	G04	Costing 2014-2015	Dandenong	4600000	8600000	41890.3	41895.6	5	9821.28
3458720	80	4.8	14.2344	1	8	0	0	0	0	0	0	0	0	0	0	1	0		0	0	3.0656	Male	Other acute hosp/ext care/rehab/geri ctr	E65B	Monday	Y	0	0	1	0	1	2	E65	Costing 2014-2015	Dandenong	4200000	8600000	41890.3	41904.5	14	12355.5
3464609	23	4.8	4.83203	0	8	0	0	0	1	0	0	0	1	0	0	1	0		0	0	4.83333	Female	Private residence/accommodation	G03A	Sunday	N	1	0	1	1	1	2	G03	Costing 2014-2015	Dandenong	2400000	8600000	41898.6	41903.4	5	9348.34
3463003	66	4.8	1.53906	0	8	0	0	0	0	0	0	0	0	0	0	1	0		0	0	3.33332	Female	Private residence/accommodation	H62B	Monday	N	0	0	1	0	1	2	H62	Costing 2014-2015	Dandenong	7000000	8600000	41896.1	41897.6	1	1592.17
3468117	75	4.8	1.40234	0	8	0	0	0	0	0	0	0	0	0	0	1	0		0	0	1.41667	Female	Private residence/accommodation	H08B	Tuesday	N	0	0	1	0	1	2	H08	Costing 2014-2015	Dandenong	898578	8600000	41904.3	41905.7	1	5639.68
3458553	62	4.8	2.64844	0	8	0	0	0	1	0	0	0	1	1	0	1	0		0	0	6.46603	Male	Private residence/accommodation	H40A	Wednesday	Y	1	0	1	1	1	2	H40	Costing 2014-2015	Dandenong	7800000	8600000	41889.8	41892.4	3	6845
3476362	21	5.11	3.67969	1	8	0	0	0	0	0	0	0	0	0	0	1	0		0	0	3.66667	Female	Private residence/accommodation	G70A	Tuesday	Y	0	0	1	1	1	2	G70	Costing 2014-2015	Dandenong	7900000	8600000	41915.9	41919.6	4	4122.75
3457743	73	3.8	1.90625	0	8	0	0	0	0	0	0	0	0	0	0	1	0		0	0	1.91667	Female	Private residence/accommodation	H63B	Sunday	N	0	0	1	0	1	2	H63	Costing 2014-2015	Dandenong	410734	8600000	41887.7	41889.6	2	1623.86
3469068	38	4.8	0.914063	1	8	0	0	0	0	0	0	0	0	0	0	1	0		0	0	0.875	Female	Private residence/accommodation	H08B	Wednesday	N	0	0	1	0	1	2	H08	Costing 2014-2015	Dandenong	4000000	8600000	41905.5	41906.4	1	3836.16
3469286	80	4.8	6.91016	0	8	0	0	0	0	0	0	0	0	0	0	1	0		0	0	12.9265	Male	Private residence/accommodation	G02A	Tuesday	Y	0	0	1	1	1	2	G02	Costing 2014-2015	Dandenong	7900000	8600000	41905.7	41912.6	7	12055.6
3476125	74	5.11	5.83203	1	8	0	0	0	0	0	0	0	0	0	0	1	0		0	0	4.24047	Male	Private residence/accommodation	J08A	Thursday	Y	0	0	1	1	1	2	J08	Costing 2014-2015	Dandenong	4200000	8600000	41915.7	41921.6	6	9111.1
3464588	79	4.8	14.9805	0	8	0	0	0	0	0	0	0	0	0	0	1	0		0	0	15	Female	Statistical Separation	G04A	Wednesday	Y	0	0	1	1	1	2	G04	Costing 2014-2015	Dandenong	1000000	8600000	41898.7	41913.7	15	17395.1
3469694	74	4.8	1.12109	0	8	0	0	0	0	0	0	0	0	0	0	1	0		0	0	3.33332	Male	Private residence/accommodation	H62B	Thursday	N	0	0	1	0	1	2	H62	Costing 2014-2015	Dandenong	4400000	8600000	41906.4	41907.5	1	994.68
3475776	81	5.11	1.4375	0	8	0	0	0	0	0	0	0	0	1	0	1	0		0	0	1.45833	Male	Private residence/accommodation	Q61B	Saturday	N	0	0	1	0	1	2	Q61	Costing 2014-2015	Dandenong	299445	8600000	41915.4	41916.8	1	1511.76
3460671	46	4.8	3.0625	1	8	0	0	0	0	0	0	0	0	0	0	1	0		0	0	2.91706	Female	Private residence/accommodation	L63B	Saturday	N	0	0	1	0	1	2	L63	Costing 2014-2015	Dandenong	7200000	8600000	41892.6	41895.7	3	4034.5
3462430	54	4.8	7.17578	1	8	0	0	0	0	0	0	0	0	0	0	1	0		0	0	5.91868	Female	Private residence/accommodation	H62A	Friday	Y	0	0	1	1	1	2	H62	Costing 2014-2015	Dandenong	4400000	8600000	41894.6	41901.7	7	7437
3468772	22	4.8	5.62891	1	8	0	0	0	0	0	0	0	0	0	0	1	0		0	0	4.01729	Female	Private residence/accommodation	G64A	Sunday	Y	0	0	1	1	1	2	G64	Costing 2014-2015	Dandenong	7900000	8600000	41904.9	41910.5	6	5642.43
3454667	35	3.8	1.03906	0	8	0	0	0	0	0	0	0	0	0	0	1	0		0	0	3.57599	Male	Left against Medical Advice	H62B	Tuesday	N	0	0	1	0	1	2	H62	Costing 2014-2015	Dandenong	4000000	8500000	41883.9	41884.9	1	1068.62
3464107	65	4.8	6.25781	0	8	0	0	0	0	0	0	0	0	0	0	1	0		0	0	6.29167	Female	Private residence/accommodation	N12A	Monday	N	0	0	1	1	1	2	N12	Costing 2014-2015	Dandenong	4200000	8600000	41898.3	41904.5	6	17195.7
3467536	23	4.8	0.898438	0	8	0	0	0	0	0	0	0	0	0	0	1	0		0	0	3.04224	Female	Private residence/accommodation	H08B	Sunday	N	0	0	1	0	1	2	H08	Costing 2014-2015	Dandenong	4300000	8600000	41902.6	41903.5	1	6547.71
3469812	63	4.8	2.91016	0	8	0	0	0	0	0	0	0	0	0	0	1	0		0	0	2.91667	Female	Private residence/accommodation	G67A	Saturday	N	0	0	1	1	1	2	G67	Costing 2014-2015	Dandenong	2300000	8600000	41906.5	41909.4	3	3644.71
3469913	72	4.8	4.91406	1	8	0	0	0	0	0	0	0	0	0	0	1	0		0	0	3.02675	Female	Private residence/accommodation	G70B	Monday	N	0	0	1	0	1	2	G70	Costing 2014-2015	Dandenong	2300000	8600000	41906.6	41911.5	5	6242.1
3459813	52	4.8	1.06641	0	8	0	0	0	0	0	0	0	0	0	0	1	0		0	0	1.08333	Male	Private residence/accommodation	G48A	Wednesday	N	0	0	1	1	1	2	G48	Costing 2014-2015	Dandenong	4100000	8600000	41891.6	41892.6	1	2220
3460635	42	4.8	5.99219	0	8	0	0	0	0	0	0	0	0	0	0	1	0		0	0	6	Female	Private residence/accommodation	G66A	Tuesday	Y	0	0	1	1	1	2	G66	Costing 2014-2015	Dandenong	803395	8600000	41892.6	41898.6	6	5341.17
3473090	53	4.8	4.09375	1	8	0	0	0	0	0	0	0	0	0	0	1	0		0	0	3.03042	Male	Private residence/accommodation	G47B	Friday	Y	0	0	1	0	1	2	G47	Costing 2014-2015	Dandenong	7900000	8600000	41911.6	41915.7	4	6040.62
3467407	85	4.8	3.50781	1	8	0	0	0	0	0	0	0	0	0	0	1	0		0	0	2.40883	Male	Private residence/accommodation	G70B	Tuesday	N	0	0	1	0	1	2	G70	Costing 2014-2015	Dandenong	472290	8600000	41902	41905.5	4	3671.67
3470692	81	4.8	1.03125	1	8	0	0	0	0	0	0	0	0	0	0	1	0		0	0	1	Male	Private residence/accommodation	H02B	Friday	N	0	0	1	0	1	2	H02	Costing 2014-2015	Dandenong	4400000	8600000	41907.5	41908.5	1	2630.17
3463203	39	4.8	4.75391	0	8	0	0	0	0	0	0	0	0	1	0	1	0		0	0	5.04531	Male	Private residence/accommodation	X63A	Friday	N	0	0	1	1	1	2	X63	Costing 2014-2015	Dandenong	7400000	8600000	41896.8	41901.5	5	5983.5
3474028	59	4.8	1.88281	0	8	0	0	0	0	0	0	0	0	0	0	1	0		0	0	8.74459	Male	Other acute hosp/ext care/rehab/geri ctr	G60A	Thursday	N	0	0	1	1	1	2	G60	Costing 2014-2015	Dandenong	2400000	8600000	41912.6	41914.5	2	1541.63
3472256	89	4.8	5.39453	1	8	0	0	0	0	0	0	0	0	0	0	1	0		0	0	4.43409	Female	Private residence/accommodation	G70A	Friday	Y	0	0	1	1	1	2	G70	Costing 2014-2015	Dandenong	4100000	8600000	41910	41915.4	6	6668.48
3471477	59	4.8	5.12891	1	8	0	0	0	0	0	0	0	0	0	0	1	0		0	0	5.125	Female	Private residence/accommodation	H64A	Wednesday	N	0	0	1	1	1	2	H64	Costing 2014-2015	Dandenong	2200000	8600000	41908.6	41913.7	5	4319.32
3469505	42	4.8	1.91406	0	8	0	0	0	0	0	0	0	0	0	0	1	0		0	0	5.82512	Female	Private residence/accommodation	G70A	Thursday	N	0	0	1	1	1	2	G70	Costing 2014-2015	Dandenong	4500000	8600000	41905.9	41907.8	2	2279.01
3471302	62	4.8	1.38281	0	8	1	0	0	0	0	0	0	1	0	0	1	0		0	0	7.03805	Male	Death	H63A	Saturday	N	1	0	1	1	1	2	H63	Costing 2014-2015	Dandenong	7800000	8600000	41908.4	41909.8	1	1076.46
3467232	67	4.8	1.59766	0	8	0	0	0	0	0	0	0	0	0	0	1	0		0	0	3.02675	Male	Private residence/accommodation	G70B	Sunday	N	0	0	1	0	1	2	G70	Costing 2014-2015	Dandenong	4700000	8600000	41901.9	41903.5	2	1656.59
3470326	63	4.8	8.625	1	8	0	0	0	1	0	0	0	1	1	0	1	0		0	0	7.26373	Female	Private residence/accommodation	G47A	Friday	Y	1	0	1	1	1	2	G47	Costing 2014-2015	Dandenong	4600000	8600000	41907.1	41915.7	8	20889.1
3466160	49	4.8	0.902344	0	8	0	0	0	0	0	0	0	0	0	0	1	0		0	0	0.875	Male	Other acute hosp/ext care/rehab/geri ctr	T61B	Friday	N	0	0	1	0	1	2	T61	Costing 2014-2015	Dandenong	2000000	8600000	41900.6	41901.5	1	1055.36
3476319	42	5.11	8.00781	1	8	0	0	0	0	0	0	0	0	0	0	1	0		0	0	6.99249	Male	Private residence/accommodation	H62A	Saturday	Y	0	0	1	1	1	2	H62	Costing 2014-2015	Dandenong	7800000	8600000	41915.7	41923.7	8	10091.5
3467019	60	4.8	4.66797	1	8	0	0	0	0	0	0	0	0	0	0	1	0		0	0	4.19782	Male	Private residence/accommodation	G65A	Wednesday	N	0	0	1	1	1	2	G65	Costing 2014-2015	Dandenong	2100000	8600000	41901.8	41906.4	5	3922.51
3457100	53	3.8	5.32813	0	8	0	0	0	0	0	0	0	0	0	0	1	0		0	0	5.33333	Male	Private residence/accommodation	G04C	Wednesday	N	0	0	1	0	1	2	G04	Costing 2014-2015	Dandenong	7400000	8600000	41887.3	41892.6	5	15479.8
3471014	70	4.8	0.859375	0	8	0	0	0	0	0	0	0	0	0	0	1	0		0	0	3.38855	Female	Private residence/accommodation	H63B	Friday	N	0	0	1	0	1	2	H63	Costing 2014-2015	Dandenong	4500000	8600000	41907.9	41908.7	1	1026.32
3455448	36	3.8	2.60156	0	8	0	0	0	0	0	0	0	0	0	0	1	0		0	0	2.91185	Female	Left against Medical Advice	H62B	Friday	N	0	0	1	0	1	2	H62	Costing 2014-2015	Dandenong	4600000	8500000	41885.1	41887.8	2	4784.89
3476363	31	5.11	2.76563	0	8	0	0	0	0	0	0	0	0	0	0	1	0		0	0	2.79167	Male	Private residence/accommodation	H62A	Monday	N	0	0	1	1	1	2	H62	Costing 2014-2015	Dandenong	2500000	8600000	41915.9	41918.7	3	2492.87
3453921	62	3.8	0.230469	1	8	0	0	0	0	0	0	0	0	0	0	1	0		0	0	0.21004	Male	Private residence/accommodation	G67B	Monday	N	0	0	1	0	1	2	G67	Costing 2014-2015	Dandenong	7700000	8500000	41883.2	41883.4	1	356.915
3459106	74	4.8	6.83594	0	8	0	0	0	0	0	0	0	0	0	0	1	0		0	0	14.991	Female	Private residence/accommodation	G02A	Monday	Y	0	0	1	1	1	2	G02	Costing 2014-2015	Dandenong	4000000	8600000	41890.6	41897.5	7	12418.9
3472374	55	4.8	8.03906	1	8	0	0	0	0	0	0	0	0	0	0	1	0		0	0	7.05161	Male	Private residence/accommodation	X63A	Monday	N	0	0	1	1	1	2	X63	Costing 2014-2015	Dandenong	1000000	8600000	41910.4	41918.5	8	10097
3466069	70	4.8	1.15234	0	8	0	0	0	0	0	0	0	0	0	0	1	0		0	0	1.16667	Female	Private residence/accommodation	G60B	Friday	N	0	0	1	0	1	2	G60	Costing 2014-2015	Dandenong	183519	8600000	41900.5	41901.7	1	2200.72
3455611	66	3.8	10.0859	0	8	0	0	0	0	0	0	0	0	0	0	1	0		0	0	16.5271	Male	Private residence/accommodation	G01A	Saturday	Y	0	0	1	1	1	2	G01	Costing 2014-2015	Dandenong	325918	8600000	41885.3	41895.4	10	26067.1
3472847	30	4.8	0.390625	1	8	0	0	0	0	0	0	0	0	0	0	1	0		0	0	0.247463	Female	Private residence/accommodation	N62Z	Monday	N	0	0	1	0	1	2	N62	Costing 2014-2015	Dandenong	4400000	8600000	41911.4	41911.8	1	1258.05
3465698	87	4.8	2.67969	0	8	0	0	0	0	0	0	0	0	0	0	1	0		0	0	2.87502	Female	Aged care residential facility	G70A	Saturday	N	0	0	1	1	1	2	G70	Costing 2014-2015	Dandenong	4300000	8600000	41900	41902.7	2	2710.88
3465999	58	4.8	7.01563	0	8	0	0	0	0	0	0	0	0	1	0	1	0		0	0	7.26373	Male	Private residence/accommodation	G47A	Thursday	N	0	0	1	1	1	2	G47	Costing 2014-2015	Dandenong	2300000	8600000	41900.5	41907.5	7	12313.8
3470800	62	4.8	8.74219	0	8	0	0	0	0	0	0	0	0	1	0	1	0		0	0	10.9622	Male	Private residence/accommodation	G48A	Saturday	N	0	0	1	1	1	2	G48	Costing 2014-2015	Dandenong	4600000	8600000	41907.6	41916.4	9	11639.6
3472807	60	4.8	2.27344	0	8	0	0	0	0	0	0	0	0	0	0	1	0		0	0	5.91868	Male	Private residence/accommodation	H62A	Wednesday	N	0	0	1	1	1	2	H62	Costing 2014-2015	Dandenong	1000000	8600000	41911.4	41913.7	2	1983.09
3471143	74	4.8	6.93359	1	8	0	0	0	0	0	0	0	0	0	0	1	0		0	0	5.62931	Male	Private residence/accommodation	G48A	Friday	Y	0	0	1	1	1	2	G48	Costing 2014-2015	Dandenong	2100000	8600000	41908.5	41915.4	7	9123.88
3473508	68	4.8	3.04297	0	8	0	0	0	0	0	0	0	0	0	0	1	0		0	0	8.4803	Male	Private residence/accommodation	G46A	Friday	N	0	0	1	1	1	2	G46	Costing 2014-2015	Dandenong	2200000	8600000	41912.4	41915.5	3	3553.66
3469303	88	4.8	7.15625	0	8	0	0	0	0	0	0	0	0	0	0	1	0		0	0	7.35568	Female	Other acute hosp/ext care/rehab/geri ctr	H64A	Tuesday	N	0	0	1	1	1	2	H64	Costing 2014-2015	Dandenong	2400000	8600000	41905.7	41912.9	7	6910.87
3466421	67	4.8	8.39844	1	8	0	0	0	0	0	0	0	0	0	0	1	0		0	0	8.375	Male	Private residence/accommodation	G02A	Saturday	Y	0	0	1	1	1	2	G02	Costing 2014-2015	Dandenong	7800000	8600000	41901.3	41909.7	8	23121.8
3456937	35	3.8	5.59375	1	8	0	0	0	0	0	0	0	0	0	0	1	0		0	0	5.58333	Female	Private residence/accommodation	G66A	Wednesday	N	0	0	1	1	1	2	G66	Costing 2014-2015	Dandenong	2400000	8600000	41886.8	41892.4	6	6339.43
3466438	65	4.8	4.98438	0	8	0	0	0	0	0	0	0	0	0	0	1	0		0	0	5	Female	Private residence/accommodation	G02A	Wednesday	N	0	0	1	1	1	2	G02	Costing 2014-2015	Dandenong	7900000	8600000	41901.3	41906.3	5	13098.1
3468513	65	4.8	6.84375	1	8	0	0	0	0	0	0	0	0	1	0	1	0		0	0	5.73811	Male	Private residence/accommodation	G65A	Monday	N	0	0	1	1	1	2	G65	Costing 2014-2015	Dandenong	4100000	8600000	41904.7	41911.5	7	7936.48
3469449	71	4.8	3.13672	0	8	0	0	0	0	0	0	0	0	0	0	1	0		0	0	4.01849	Male	Private residence/accommodation	B70B	Friday	Y	0	0	1	0	1	2	B70	Costing 2014-2015	Dandenong	7100000	8600000	41905.6	41908.8	3	4253.73
3457014	55	3.8	6.30078	1	8	0	0	0	0	0	0	0	0	0	0	1	0		0	0	3.7456	Male	Private residence/accommodation	G47B	Thursday	Y	0	0	1	0	1	2	G47	Costing 2014-2015	Dandenong	7900000	8600000	41887.2	41893.5	6	7281.29
3472313	27	4.8	5.78125	1	8	0	0	0	0	0	0	0	0	0	0	1	0		3.09444	4456	1.63001	Male	Private residence/accommodation	G11Z	Friday	N	0	0	1	0	1	2	G11	Costing 2014-2015	Dandenong	4100000	8600000	41909.9	41915.7	6	7350.03
3456099	35	3.8	2.17188	1	8	0	0	0	0	0	0	0	0	0	0	1	0		0	0	1.26458	Male	Private residence/accommodation	G67B	Friday	N	0	0	1	0	1	2	G67	Costing 2014-2015	Dandenong	2300000	8600000	41885.4	41887.5	2	2657.89
3473617	41	4.8	3.07031	0	8	0	0	0	0	0	0	0	0	0	0	1	0		0	0	6.86277	Male	Private residence/accommodation	G47A	Friday	Y	0	0	1	1	1	2	G47	Costing 2014-2015	Dandenong	4500000	8600000	41912.4	41915.5	3	4342.38
3457569	77	3.8	10.832	0	8	0	0	0	0	0	0	0	0	0	0	1	0		0	0	14.991	Male	Private residence/accommodation	G02A	Tuesday	Y	0	0	1	1	1	2	G02	Costing 2014-2015	Dandenong	2200000	8600000	41887.8	41898.6	11	22874.1
3468835	58	4.8	15.4609	0	8	0	0	0	0	0	0	0	0	0	0	1	0		8.07917	11634	13.3959	Male	Private residence/accommodation	G12A	Wednesday	Y	0	0	1	1	1	2	G12	Costing 2014-2015	Dandenong	864415	8600000	41905.2	41920.7	15	12049.9
3470259	77	4.8	8.49609	0	8	0	0	0	0	0	0	0	0	0	0	1	0		0	0	16.5271	Female	Private residence/accommodation	G01A	Friday	Y	0	0	1	1	1	2	G01	Costing 2014-2015	Dandenong	7000000	8600000	41907	41915.5	9	24882.3
3464933	79	4.8	6.56641	0	8	0	0	0	0	0	0	0	0	0	0	1	0		0	0	8.26251	Male	Private residence/accommodation	G48A	Tuesday	Y	0	0	1	1	1	2	G48	Costing 2014-2015	Dandenong	4000000	8600000	41899.1	41905.6	6	9807.17
3457500	21	3.8	2.69922	1	8	0	0	0	0	0	0	0	0	0	0	1	0		0	0	1.21268	Male	Private residence/accommodation	G70B	Monday	N	0	0	1	0	1	2	G70	Costing 2014-2015	Dandenong	2400000	8600000	41887.7	41890.4	3	3296.21
3461228	53	4.8	3.16016	1	8	0	0	0	0	0	0	0	0	0	0	1	0		0	0	2.74037	Male	Private residence/accommodation	G67B	Sunday	N	0	0	1	0	1	2	G67	Costing 2014-2015	Dandenong	2400000	8600000	41893.4	41896.6	3	3328.58
3467610	38	4.8	4.44922	0	8	0	0	0	0	0	0	0	0	0	0	1	0		0	0	6.99249	Male	Private residence/accommodation	H62A	Thursday	Y	0	0	1	1	1	2	H62	Costing 2014-2015	Dandenong	465396	8600000	41903.1	41907.5	4	4285.98
3474623	66	4.8	1.69141	0	8	0	0	0	0	0	0	0	0	0	0	1	0		0	0	2.73058	Male	Private residence/accommodation	G65B	Friday	N	0	0	1	0	1	2	G65	Costing 2014-2015	Dandenong	4700000	8600000	41913.7	41915.4	2	2953.69
3471836	42	4.8	1.53906	0	8	0	0	0	0	0	0	0	0	0	0	1	0		0	0	3.57599	Male	Private residence/accommodation	H62B	Sunday	N	0	0	1	0	1	2	H62	Costing 2014-2015	Dandenong	7900000	8600000	41908.9	41910.5	2	1410.37
3456043	52	3.8	1.8125	0	8	0	0	0	0	0	0	0	0	1	0	1	0		0	0	3.6399	Female	Private residence/accommodation	H64A	Friday	N	0	0	1	1	1	2	H64	Costing 2014-2015	Dandenong	473641	8600000	41885.8	41887.6	2	1799.17
3470162	51	4.8	1.79688	1	8	0	0	0	0	0	0	0	0	0	0	1	0		0	0	1.79167	Female	Private residence/accommodation	G66A	Friday	N	0	0	1	1	1	2	G66	Costing 2014-2015	Dandenong	1000000	8600000	41906.6	41908.4	2	2555.47
3457474	90	3.8	8.98047	1	8	0	0	0	0	0	0	0	0	0	0	1	0		0	0	5.0825	Female	Aged care residential facility	G61A	Sunday	Y	0	0	1	1	1	2	G61	Costing 2014-2015	Dandenong	2200000	8600000	41887.6	41896.6	9	7219.67
3471376	47	4.8	4.02344	1	8	0	0	0	0	0	0	0	0	0	0	1	0		0	0	1.89902	Male	Private residence/accommodation	G07B	Tuesday	N	0	0	1	0	1	2	G07	Costing 2014-2015	Dandenong	735177	8600000	41908.5	41912.5	4	7977.22
3472061	61	4.8	19.9922	1	8	0	0	0	0	0	0	1	1	0	0	1	0		0	0	15.3931	Female	Private residence/accommodation	G02A	Friday	Y	1	0	1	1	1	2	G02	Costing 2014-2015	Dandenong	7400000	8600000	41909.5	41929.5	20	34835.7
3457477	58	3.8	9.95313	1	8	0	0	0	0	0	0	0	0	0	0	1	0		0	0	3.57704	Female	Private residence/accommodation	X06A	Monday	N	0	0	1	1	1	2	X06	Costing 2014-2015	Dandenong	7900000	8600000	41887.6	41897.6	10	18731.4
3462610	86	4.8	40.8203	0	8	0	0	0	0	0	0	0	0	0	0	1	0		0	0	40.8333	Female	Statistical Separation	X63A	Thursday	Y	0	0	1	1	1	2	X63	Costing 2014-2015	Dandenong	4300000	8600000	41894.9	41935.7	41	47629.7
3467562	71	4.8	1.89844	0	8	0	0	0	0	0	0	0	0	0	0	1	0		0	0	3.2278	Female	Private residence/accommodation	G70A	Monday	N	0	0	1	1	1	2	G70	Costing 2014-2015	Dandenong	4500000	8600000	41902.6	41904.5	2	2605.11
3468089	75	4.8	1.82813	0	8	0	0	0	0	0	0	0	0	0	0	1	0		0	0	4.13968	Female	Private residence/accommodation	H63B	Tuesday	Y	0	0	1	0	1	2	H63	Costing 2014-2015	Dandenong	2100000	8600000	41903.9	41905.8	2	2434.8
3471008	61	4.8	4.11719	0	8	0	0	0	0	0	0	0	0	0	0	1	0		0	0	4.125	Male	Private residence/accommodation	G10A	Tuesday	N	0	0	1	1	1	2	G10	Costing 2014-2015	Dandenong	4600000	8600000	41908.3	41912.4	4	8810.51
3464835	78	4.8	6.17188	0	8	0	0	0	0	0	0	0	0	1	0	1	0		0	0	6.20833	Female	Private residence/accommodation	G02A	Tuesday	Y	0	0	1	1	1	2	G02	Costing 2014-2015	Dandenong	4000000	8600000	41899.3	41905.5	6	18487.7
3474218	74	4.8	1.66797	1	8	0	0	0	0	0	0	0	0	0	0	1	0		0	0	1.66667	Male	Private residence/accommodation	G66A	Thursday	N	0	0	1	1	1	2	G66	Costing 2014-2015	Dandenong	4100000	8600000	41913	41914.7	1	2475.46
3457539	42	3.8	0.773438	0	8	0	0	0	0	0	0	0	0	0	0	1	0		0	0	0.791667	Male	Private residence/accommodation	G66A	Saturday	N	0	0	1	1	1	2	G66	Costing 2014-2015	Dandenong	2500000	8600000	41887.7	41888.5	1	756.979
3470737	78	4.8	7.04297	1	8	0	0	0	0	0	0	0	0	0	0	1	0		0	0	5.73811	Female	Private residence/accommodation	G65A	Thursday	Y	0	0	1	1	1	2	G65	Costing 2014-2015	Dandenong	4000000	8600000	41907.6	41914.6	7	8213.42
3468383	75	4.8	3.02734	0	8	0	0	0	0	0	0	0	0	0	0	1	0		0	0	3.04167	Female	Private residence/accommodation	G48B	Thursday	N	0	0	1	0	1	2	G48	Costing 2014-2015	Dandenong	320809	8600000	41904.5	41907.5	3	4210.16
3475714	71	5.11	4.23438	1	8	0	0	0	0	0	0	0	0	0	0	1	0		0	0	4.20833	Female	Private residence/accommodation	G01B	Tuesday	Y	0	0	1	0	1	2	G01	Costing 2014-2015	Dandenong	4300000	8600000	41915.3	41919.5	4	14152.8
3468571	39	4.8	8.03906	1	8	0	0	0	0	0	0	0	0	0	0	1	0		0	0	5.31927	Female	Private residence/accommodation	J64A	Tuesday	Y	0	0	1	1	1	2	J64	Costing 2014-2015	Dandenong	756291	8600000	41904.8	41912.8	8	7681.59
3470640	26	4.8	0.980469	1	8	0	0	0	0	0	0	0	0	0	0	1	0		0	0	0.958333	Male	Private residence/accommodation	G11Z	Friday	N	0	0	1	0	1	2	G11	Costing 2014-2015	Dandenong	322082	8600000	41907.5	41908.4	1	3336.37
3464870	26	4.8	1.64844	0	8	0	0	0	0	0	0	0	0	0	0	1	0		0	0	1.66667	Female	Private residence/accommodation	G66A	Thursday	N	0	0	1	1	1	2	G66	Costing 2014-2015	Dandenong	4700000	8600000	41898.9	41900.5	2	1868.96
3475298	69	4.8	6.17188	0	8	0	0	0	0	0	0	0	0	0	0	1	0		0	0	6.20833	Female	Private residence/accommodation	H62A	Wednesday	Y	0	0	1	1	1	2	H62	Costing 2014-2015	Dandenong	715716	8600000	41914.6	41920.8	6	5776.47
3456183	60	3.8	19.3086	0	8	0	0	0	0	0	0	1	1	0	0	1	0		0	0	19.3333	Male	Private residence/accommodation	G02A	Tuesday	Y	1	0	1	1	1	2	G02	Costing 2014-2015	Dandenong	4300000	8600000	41886.3	41905.6	19	39415.6
3461752	33	4.8	4.57031	1	8	0	0	0	0	0	0	0	0	0	0	1	0		0	0	4.42933	Male	Private residence/accommodation	X40Z	Tuesday	Y	0	0	1	0	1	2	X40	Costing 2014-2015	Dandenong	7200000	8600000	41893.9	41898.5	5	12446
3474524	51	4.8	12.1836	0	8	0	0	0	0	0	0	0	0	0	0	1	0		0	0	12.4698	Female	Private residence/accommodation	G01A	Monday	Y	0	0	1	1	1	2	G01	Costing 2014-2015	Dandenong	767772	8600000	41913.5	41925.7	12	21804
3474889	53	4.8	3.5625	0	8	0	0	0	0	0	0	0	0	0	0	1	0		0	0	3.58333	Male	Private residence/accommodation	H62B	Sunday	Y	0	0	1	0	1	2	H62	Costing 2014-2015	Dandenong	2500000	8600000	41913.9	41917.5	4	3496.81
3455488	53	3.8	0.699219	0	8	0	0	0	0	0	0	0	0	0	0	1	0		0	0	1.40105	Male	Private residence/accommodation	G67B	Wednesday	N	0	0	1	0	1	2	G67	Costing 2014-2015	Dandenong	7800000	8500000	41885	41885.7	1	666.551
3459483	55	4.8	3.58594	0	8	0	0	0	1	0	0	0	1	0	0	1	0		0	0	12.471	Male	Other acute hosp/ext care/rehab/geri ctr	H60A	Friday	Y	1	0	1	1	1	2	H60	Costing 2014-2015	Dandenong	2200000	8600000	41891	41894.6	3	5047.58
3476157	55	5.11	0.878906	0	8	0	0	0	0	0	0	0	0	0	0	1	0		0	0	4.57457	Male	Private residence/accommodation	F14C	Saturday	N	0	0	1	0	1	2	F14	Costing 2014-2015	Dandenong	7800000	8600000	41915.7	41916.6	1	1092.38
3453999	40	3.8	13.1836	1	8	0	0	0	0	0	0	0	0	0	0	1	0		0	0	13.1667	Female	Private residence/accommodation	G02A	Sunday	Y	0	0	1	1	1	2	G02	Costing 2014-2015	Dandenong	2500000	8500000	41883.3	41896.5	13	18395
3462928	42	4.8	1.67969	0	8	0	0	0	0	0	0	0	0	1	0	1	0		0	0	1.80228	Male	Private residence/accommodation	G70B	Monday	N	0	0	1	0	1	2	G70	Costing 2014-2015	Dandenong	308608	8600000	41896	41897.7	1	1559.08
3468461	46	4.8	4.19922	0	8	0	0	0	0	0	0	0	0	0	0	1	0		0	0	9.18249	Female	Private residence/accommodation	G48A	Friday	N	0	0	1	1	1	2	G48	Costing 2014-2015	Dandenong	4200000	8600000	41904.6	41908.8	4	4174.14
3474844	23	4.8	8.80469	0	8	0	0	0	0	0	0	0	0	1	0	1	0		0	0	8.83333	Male	Private residence/accommodation	801A	Friday	Y	0	0	1	1	1	2	801	Costing 2014-2015	Dandenong	723205	8600000	41913.9	41922.7	9	9323.07
3454354	40	3.8	4.10547	1	8	0	0	0	0	0	0	0	0	0	0	1	0		0	0	4.08333	Female	Private residence/accommodation	H60A	Friday	Y	0	0	1	1	1	2	H60	Costing 2014-2015	Dandenong	2400000	8500000	41883.6	41887.7	4	4277.86
3476008	84	5.11	7.86719	1	8	0	0	0	0	0	0	0	0	0	0	1	0		2.66319	3835	5.21181	Male	Private residence/accommodation	J12B	Saturday	Y	0	0	1	0	1	2	J12	Costing 2014-2015	Dandenong	4400000	8600000	41915.7	41923.5	8	9004.3
3470853	48	4.8	0.847656	0	8	0	0	0	0	0	0	0	0	0	0	1	0		0	0	4.64509	Male	Private residence/accommodation	H63B	Friday	N	0	0	1	0	1	2	H63	Costing 2014-2015	Dandenong	2300000	8600000	41907.7	41908.5	1	1456.76
3462643	23	4.8	7.95313	1	8	0	0	0	0	0	0	0	0	0	0	1	0		0	0	5.17525	Male	Private residence/accommodation	G64A	Sunday	Y	0	0	1	1	1	2	G64	Costing 2014-2015	Dandenong	401117	8600000	41895.5	41903.4	8	7776.36
3468531	80	4.8	0.730469	0	8	0	0	0	0	0	0	0	0	0	0	1	0		0	0	0.75	Male	Private residence/accommodation	H61B	Tuesday	N	0	0	1	0	1	2	H61	Costing 2014-2015	Dandenong	4200000	8600000	41904.7	41905.4	1	817.785
3463144	90	4.8	8.82031	1	8	0	0	0	0	0	0	0	0	0	0	1	0		0	0	5.08935	Female	Private residence/accommodation	G61A	Tuesday	Y	0	0	1	1	1	2	G61	Costing 2014-2015	Dandenong	4000000	8600000	41896.6	41905.4	9	8321.02
3461470	58	4.8	6.03516	0	8	0	0	0	0	0	0	0	0	0	0	1	0		0	0	6.53675	Male	Private residence/accommodation	G70A	Wednesday	N	0	0	1	1	1	2	G70	Costing 2014-2015	Dandenong	7900000	8600000	41893.6	41899.7	6	6894.33
3462674	54	4.8	1.20313	0	8	0	0	0	0	0	0	0	0	0	0	1	0		0	0	1.20833	Male	Private residence/accommodation	D04Z	Sunday	N	0	0	1	0	1	2	D04	Costing 2014-2015	Dandenong	4000000	8600000	41895.5	41896.7	1	4400.75
3474932	60	4.8	1.46094	1	8	0	0	0	0	0	0	0	0	0	0	1	0		0	0	1.45833	Female	Private residence/accommodation	G66A	Friday	N	0	0	1	1	1	2	G66	Costing 2014-2015	Dandenong	2100000	8600000	41914.2	41915.6	1	1718.91
3457826	65	4.8	0.773438	1	8	0	0	0	0	0	0	0	0	0	0	1	0		0	0	0.319633	Female	Private residence/accommodation	G65B	Saturday	N	0	0	1	0	1	2	G65	Costing 2014-2015	Dandenong	329029	8600000	41888.1	41888.8	1	1775.8
3469059	81	4.8	1.94922	1	8	0	0	0	0	0	0	0	0	0	0	1	0		0	0	1.91667	Male	Private residence/accommodation	G04B	Thursday	Y	0	0	1	0	1	2	G04	Costing 2014-2015	Dandenong	2300000	8600000	41905.5	41907.4	2	9060.83
3458421	49	4.8	2.66016	0	8	0	0	0	0	0	0	0	0	0	0	1	0		0	0	3.44266	Male	Private residence/accommodation	H60B	Tuesday	N	0	0	1	0	1	2	H60	Costing 2014-2015	Dandenong	376023	8600000	41889	41891.6	3	2361.58
3471046	85	4.8	3.60547	1	8	0	0	0	0	0	0	0	0	0	0	1	0		0	0	2.31502	Female	Aged care residential facility	G70B	Monday	N	0	0	1	0	1	2	G70	Costing 2014-2015	Dandenong	734960	8600000	41907.9	41911.5	4	3465.94
3456072	73	3.8	1.64844	0	8	0	0	0	0	0	0	0	0	0	0	1	0		0	0	1.81068	Female	Other acute hosp/ext care/rehab/geri ctr	H62B	Friday	N	0	0	1	0	1	2	H62	Costing 2014-2015	Dandenong	410734	8600000	41885.8	41887.5	2	1681.02
3463586	55	4.8	2.11328	1	8	0	0	0	0	0	0	0	0	0	0	1	0		0	0	2.08333	Male	Private residence/accommodation	G66A	Wednesday	N	0	0	1	1	1	2	G66	Costing 2014-2015	Dandenong	7000000	8600000	41897.5	41899.6	2	2698.6
3467716	38	4.8	1.82031	1	8	0	0	0	0	0	0	0	0	0	0	1	0		0	0	1.79167	Female	Private residence/accommodation	G10A	Monday	N	0	0	1	1	1	2	G10	Costing 2014-2015	Dandenong	4100000	8600000	41902.7	41904.5	2	6539.25
3464136	85	4.8	5.68359	1	8	0	0	0	0	0	0	0	0	0	0	1	0		0	0	3.42482	Female	Private residence/accommodation	G61A	Sunday	Y	0	0	1	1	1	2	G61	Costing 2014-2015	Dandenong	4500000	8600000	41897.9	41903.6	6	5459.77
3472345	71	4.8	43.9297	1	8	0	0	0	1	0	0	1	2	0	0	1	0		0	0	28.3716	Female	Other acute hosp/ext care/rehab/geri ctr	A06B	Monday	Y	1	0	1	0	1	2	A06	Costing 2014-2015	Dandenong	7900000	8600000	41909.8	41953.7	44	111582
3458672	50	4.8	2.65625	1	8	0	0	0	1	0	0	0	1	0	0	1	0		0	0	2.625	Female	Other acute hosp/ext care/rehab/geri ctr	G66A	Wednesday	N	1	0	1	1	1	2	G66	Costing 2014-2015	Dandenong	2300000	8600000	41890.2	41892.8	2	4250.91
3476381	63	5.11	17.7344	0	8	0	0	0	0	0	0	0	0	0	0	1	0		7.05625	10161	10.6938	Male	Private residence/accommodation	I12A	Tuesday	Y	0	0	1	1	1	2	I12	Costing 2014-2015	Dandenong	2400000	8600000	41915.9	41933.7	18	18569
3473418	71	4.8	13.7188	1	8	0	0	0	0	0	0	0	0	0	0	1	0		6.95278	10012	4.58181	Female	Private residence/accommodation	G61A	Monday	N	0	0	1	1	1	2	G61	Costing 2014-2015	Dandenong	2500000	8600000	41912	41925.7	14	9468.02
3461034	64	4.8	5.32422	1	8	0	0	0	0	0	0	0	0	0	0	1	0		0	0	3.77064	Female	Private residence/accommodation	G70A	Tuesday	Y	0	0	1	1	1	2	G70	Costing 2014-2015	Dandenong	4500000	8600000	41893.1	41898.4	5	5994.88
3468776	64	4.8	6.74609	0	8	0	0	0	0	0	0	0	0	0	0	1	0		0	0	6.88959	Male	Private residence/accommodation	E62A	Monday	Y	0	0	1	1	1	2	E62	Costing 2014-2015	Dandenong	2400000	8600000	41904.9	41911.6	7	7565.66
3461863	77	4.8	3.27344	0	8	0	0	0	0	0	0	0	0	0	0	1	0		0	0	4.58181	Male	Private residence/accommodation	G61A	Monday	N	0	0	1	1	1	2	G61	Costing 2014-2015	Dandenong	7800000	8600000	41894.3	41897.6	3	2922.03
3462036	55	4.8	2.10938	0	8	0	0	0	0	0	0	0	0	0	0	1	0		0	0	2.78812	Male	Private residence/accommodation	G64B	Sunday	N	0	0	1	0	1	2	G64	Costing 2014-2015	Dandenong	2200000	8600000	41894.5	41896.6	2	2040.48
3475694	60	5.11	5.19531	0	8	0	0	0	0	0	0	0	0	1	0	1	0		0	0	5.20833	Female	Private residence/accommodation	G01A	Wednesday	Y	0	0	1	1	1	2	G01	Costing 2014-2015	Dandenong	2100000	8600000	41915.3	41920.5	5	13210.1
3471992	45	4.8	1.95313	0	8	0	0	0	0	0	0	0	0	0	0	1	0		0	0	2.2066	Male	Private residence/accommodation	G47B	Monday	N	0	0	1	0	1	2	G47	Costing 2014-2015	Dandenong	4600000	8600000	41909.5	41911.4	2	2690.99
3475156	79	4.8	2.29688	1	8	0	0	0	0	0	0	0	0	0	0	1	0		0	0	2.29167	Male	Private residence/accommodation	G61A	Saturday	N	0	0	1	1	1	2	G61	Costing 2014-2015	Dandenong	4700000	8600000	41914.4	41916.7	2	1870.97
3455242	55	3.8	5.0625	1	8	0	0	0	0	0	0	0	0	1	0	1	0		0	0	5.04167	Male	Private residence/accommodation	G02A	Sunday	N	0	0	1	1	1	2	G02	Costing 2014-2015	Dandenong	7000000	8500000	41884.5	41889.5	5	14592.5
3463380	88	4.8	3.55859	0	8	0	0	0	0	0	0	0	0	1	0	1	0		0	0	3.58333	Male	Private residence/accommodation	G66A	Thursday	N	0	0	1	1	1	2	G66	Costing 2014-2015	Dandenong	2400000	8600000	41897.2	41900.8	3	4877.23
3460242	38	4.8	11.4883	1	8	0	0	0	0	0	0	0	0	0	0	1	0		0	0	2.96547	Male	Private residence/accommodation	H64A	Sunday	Y	0	0	1	1	1	2	H64	Costing 2014-2015	Dandenong	7900000	8600000	41892.1	41903.5	11	10936.4
3455531	47	3.8	5.26953	1	8	0	0	0	0	0	0	0	0	0	0	1	0		0	0	5.25	Female	Private residence/accommodation	G02A	Monday	Y	0	0	1	1	1	2	G02	Costing 2014-2015	Dandenong	873281	8500000	41885.3	41890.6	5	13662.9
3465433	65	4.8	5.73047	1	8	0	0	0	0	0	0	0	0	0	0	1	0		0	0	2.63327	Male	Private residence/accommodation	G61B	Tuesday	N	0	0	1	0	1	2	G61	Costing 2014-2015	Dandenong	7900000	8600000	41899.8	41905.5	6	4925.04
3462845	53	4.8	2.70313	0	8	0	0	0	0	0	0	0	0	0	0	1	0		0	0	2.70833	Female	Private residence/accommodation	D12A	Tuesday	N	0	0	1	1	1	2	D12	Costing 2014-2015	Dandenong	2100000	8600000	41895.7	41898.4	3	3926.26
3467891	72	4.8	3.6875	0	8	0	0	0	0	0	0	0	0	0	0	1	0		0	0	3.70833	Female	Private residence/accommodation	G65A	Thursday	N	0	0	1	1	1	2	G65	Costing 2014-2015	Dandenong	7300000	8600000	41903.7	41907.4	4	4408.77
3456864	57	3.8	1.95703	0	8	0	0	0	0	0	0	0	0	0	0	1	0		0	0	3.51202	Female	Private residence/accommodation	H08B	Saturday	N	0	0	1	0	1	2	H08	Costing 2014-2015	Dandenong	846937	8600000	41886.4	41888.4	2	4628.06
3463713	41	4.8	5.01953	0	8	0	0	0	0	0	0	0	0	0	0	1	0		0	0	5.53713	Female	Private residence/accommodation	G48B	Saturday	N	0	0	1	0	1	2	G48	Costing 2014-2015	Dandenong	2100000	8600000	41897.6	41902.6	5	6348.2
3454194	67	3.8	3.78125	1	8	0	0	0	0	0	0	0	0	0	0	1	0		0	0	2.43989	Male	Private residence/accommodation	G10B	Friday	N	0	0	1	0	1	2	G10	Costing 2014-2015	Dandenong	7000000	8500000	41883.6	41887.4	4	7709.97
3454763	74	3.8	39.2266	1	8	0	0	0	0	0	0	0	0	0	0	1	0		24.9222	35888	14.2861	Male	Private residence/accommodation	G04A	Saturday	Y	0	0	1	1	1	2	G04	Costing 2014-2015	Dandenong	2000000	8500000	41884.3	41923.5	39	35542.3
3466484	66	4.8	12.5	0	8	0	0	0	0	0	0	0	0	0	0	1	0		0	0	12.5	Female	Private residence/accommodation	G12C	Wednesday	Y	0	0	1	0	1	2	G12	Costing 2014-2015	Dandenong	3000000	8600000	41901	41913.5	13	15201.4
3476252	61	5.11	3.23047	0	8	0	0	0	0	0	0	0	0	0	0	1	0		0	0	6.05212	Male	Private residence/accommodation	H63A	Monday	N	0	0	1	1	1	2	H63	Costing 2014-2015	Dandenong	4100000	8600000	41915.5	41918.7	3	5886.75
3475990	72	5.11	2.70313	0	8	1	0	0	0	0	0	0	1	0	0	1	0		0	0	8.52549	Male	Death	H61B	Monday	N	1	0	1	0	1	2	H61	Costing 2014-2015	Dandenong	2100000	8600000	41915.6	41918.3	3	2113.28
3472329	58	4.8	5.25391	0	8	0	0	0	0	0	0	0	0	0	0	1	0		0	0	13.3959	Male	Private residence/accommodation	G12A	Friday	N	0	0	1	1	1	2	G12	Costing 2014-2015	Dandenong	2300000	8600000	41910.2	41915.4	5	9455.78
3458613	60	4.8	3.16406	1	8	0	0	0	0	0	0	0	0	0	0	1	0		0	0	1.62532	Male	Other acute hosp/ext care/rehab/geri ctr	H64B	Wednesday	N	0	0	1	0	1	2	H64	Costing 2014-2015	Dandenong	4000000	8600000	41889.7	41892.9	3	3197.37
3458462	54	4.8	1.87109	0	8	0	0	0	0	0	0	0	0	0	0	1	0		0	0	1.875	Male	Private residence/accommodation	X63A	Tuesday	N	0	0	1	1	1	2	X63	Costing 2014-2015	Dandenong	2000000	8600000	41889.5	41891.4	2	1546.11
3469267	54	4.8	2.04297	1	8	0	0	0	0	0	0	0	0	0	0	1	0		0	0	2.04167	Female	Private residence/accommodation	G46B	Thursday	N	0	0	1	0	1	2	G46	Costing 2014-2015	Dandenong	2500000	8600000	41905.6	41907.7	2	2774.08
3477629	61	5.11	22.1406	1	9	0	0	0	3	0	0	2	5	0	0	1	0		0	0	22.125	Male	Other acute hosp/ext care/rehab/geri ctr	G02A	Tuesday	Y	1	0	1	1	1	2	G02	Costing 2014-2015	Dandenong	7100000	8600000	41918.7	41940.8	22	43001.4
3479893	48	5.11	5.67578	1	9	0	0	0	0	0	0	0	0	0	0	1	0		0	0	2.23947	Male	Private residence/accommodation	G70B	Tuesday	N	0	0	1	0	1	2	G70	Costing 2014-2015	Dandenong	2500000	8600000	41920.8	41926.5	6	5054.48
3488461	58	5.11	7.97266	1	9	0	0	0	0	0	0	0	0	0	0	1	0		0	0	4.40541	Male	Private residence/accommodation	H62A	Thursday	N	0	0	1	1	1	2	H62	Costing 2014-2015	Dandenong	4100000	8600000	41934.5	41942.4	8	7039.83
3488713	28	5.11	4.90625	0	9	0	0	0	0	0	0	0	0	0	0	1	0		0	0	7.22816	Female	Private residence/accommodation	G48A	Monday	N	0	0	1	1	1	2	G48	Costing 2014-2015	Dandenong	2500000	8600000	41934.8	41939.7	5	5064.64
3483152	22	5.11	7.01172	1	9	0	0	0	0	0	0	0	0	0	0	1	0		0	0	7	Female	Statistical Separation	G47B	Tuesday	N	0	0	1	0	1	2	G47	Costing 2014-2015	Dandenong	849218	8600000	41926.6	41933.7	7	6402.77
3482975	44	5.11	3.07422	0	9	0	0	0	0	0	0	0	0	0	0	1	0		0	0	3.08333	Male	Private residence/accommodation	G70A	Friday	Y	0	0	1	1	1	2	G70	Costing 2014-2015	Dandenong	2100000	8600000	41926.4	41929.5	3	2972.41
3480706	62	5.11	6.93359	1	9	0	0	0	0	0	0	0	0	1	0	1	0		0	0	6.70696	Male	Private residence/accommodation	G60A	Friday	Y	0	0	1	1	1	2	G60	Costing 2014-2015	Dandenong	2200000	8600000	41922.6	41929.5	7	9301.64
3481851	71	5.11	1.10547	0	9	0	0	0	0	0	0	0	0	0	0	1	0		0	0	1.125	Female	Private residence/accommodation	G48B	Tuesday	N	0	0	1	0	1	2	G48	Costing 2014-2015	Dandenong	4500000	8600000	41925.3	41926.4	1	7119.29
3481794	62	5.11	4.17969	1	9	0	0	0	0	0	0	0	0	0	0	1	0		0	0	3.77064	Male	Private residence/accommodation	G70A	Thursday	Y	0	0	1	1	1	2	G70	Costing 2014-2015	Dandenong	7700000	8600000	41924.4	41928.5	4	4854.35
3479177	77	5.11	1.53906	0	9	0	0	1	0	0	0	0	1	0	0	1	0		0	0	5.32685	Female	Private residence/accommodation	B64B	Friday	Y	1	0	1	0	1	2	B64	Costing 2014-2015	Dandenong	2200000	8600000	41921	41922.5	2	1770.21
3481670	46	5.11	8.14063	1	9	0	0	0	0	0	0	0	0	0	0	1	0		0	0	8.125	Male	Private residence/accommodation	H40B	Monday	N	0	0	1	0	1	2	H40	Costing 2014-2015	Dandenong	2200000	8600000	41924.4	41932.6	8	8366.43
3485153	47	5.11	0.839844	1	9	0	0	0	0	0	0	0	0	0	0	1	0		0	0	0.833333	Female	Private residence/accommodation	H62B	Friday	N	0	0	1	0	1	2	H62	Costing 2014-2015	Dandenong	2400000	8600000	41928.9	41929.8	1	825.753
3476577	42	5.11	0.304688	1	9	0	0	0	0	0	0	0	0	1	0	1	0		0	0	0.256513	Male	Private residence/accommodation	J60C	Saturday	N	0	0	1	0	1	2	J60	Costing 2014-2015	Dandenong	332093	8600000	41916.5	41916.8	1	354.145
3493730	55	5.11	2.34766	1	9	0	0	0	0	0	0	0	0	0	0	1	0		0	0	0.916247	Female	Private residence/accommodation	X62B	Saturday	N	0	0	1	0	1	2	X62	Costing 2014-2015	Dandenong	899080	8600000	41942.1	41944.4	2	2958.86
3481998	56	5.11	7.14063	1	9	0	0	0	0	0	0	1	1	0	0	1	0		0	0	7.125	Female	Private residence/accommodation	G02A	Monday	Y	1	0	1	1	1	2	G02	Costing 2014-2015	Dandenong	7100000	8600000	41925.4	41932.5	7	18110.8
3493939	22	5.11	0.914063	0	9	0	0	0	0	0	0	0	0	0	0	1	0		0	0	0.916667	Female	Private residence/accommodation	H08B	Friday	N	0	0	1	0	1	2	H08	Costing 2014-2015	Dandenong	7100000	8600000	41942.5	41943.4	1	4237.34
3494163	45	5.11	8.19141	1	9	0	0	0	1	0	0	0	1	1	0	1	0		0	0	5.83225	Male	Left against Medical Advice	H62A	Friday	Y	1	0	1	1	1	2	H62	Costing 2014-2015	Dandenong	4200000	8600000	41942.7	41950.9	8	9341.03
3486296	54	5.11	4.44141	0	9	0	0	0	0	0	0	0	0	0	0	1	0		0	0	5.49332	Male	Private residence/accommodation	H43A	Thursday	N	0	0	1	1	1	2	H43	Costing 2014-2015	Dandenong	2500000	8600000	41931	41935.4	5	5872.53
3481703	24	5.11	5.17578	0	9	0	0	0	0	0	0	0	0	0	0	1	0		0	0	8.70212	Male	Private residence/accommodation	G48A	Friday	Y	0	0	1	1	1	2	G48	Costing 2014-2015	Dandenong	371130	8600000	41924.6	41929.8	5	7334.61
3490084	47	5.11	4.9375	0	9	0	0	0	0	0	0	0	0	0	0	1	0		0	0	6.14001	Male	Private residence/accommodation	G46B	Wednesday	N	0	0	1	0	1	2	G46	Costing 2014-2015	Dandenong	880120	8600000	41936.6	41941.5	5	6317.62
3479931	34	5.11	7.33984	1	9	0	0	0	0	0	0	0	0	0	0	1	0		0	0	7.33333	Female	Private residence/accommodation	G02A	Thursday	Y	0	0	1	1	1	2	G02	Costing 2014-2015	Dandenong	4300000	8600000	41921.3	41928.6	7	14290.9
3489033	51	5.11	3.33203	0	9	0	0	0	0	0	0	0	0	0	0	1	0		0	0	3.33333	Male	Private residence/accommodation	G01B	Sunday	N	0	0	1	0	1	2	G01	Costing 2014-2015	Dandenong	2100000	8600000	41935.3	41938.6	3	13111.7
3477930	73	5.11	7.17188	1	9	0	0	0	0	0	0	0	0	0	0	1	0		0	0	7.16667	Male	Private residence/accommodation	G01A	Tuesday	Y	0	0	1	1	1	2	G01	Costing 2014-2015	Dandenong	4500000	8600000	41919.3	41926.5	7	15916.7
3477141	59	5.11	3.69141	1	9	0	0	0	0	0	0	0	0	0	0	1	0		0	0	2.05307	Male	Private residence/accommodation	G47B	Thursday	N	0	0	1	0	1	2	G47	Costing 2014-2015	Dandenong	2100000	8600000	41917.8	41921.5	4	3885.1
3492764	46	5.11	5.80859	0	9	0	0	0	0	0	0	0	0	0	0	1	0		0	0	5.83333	Male	Private residence/accommodation	G70A	Monday	N	0	0	1	1	1	2	G70	Costing 2014-2015	Dandenong	7100000	8600000	41940.8	41946.6	6	7211.33
3492068	21	5.11	2.52344	1	9	0	0	0	0	0	0	0	0	0	0	1	0		0	0	2.5	Male	Private residence/accommodation	G04C	Thursday	N	0	0	1	0	1	2	G04	Costing 2014-2015	Dandenong	860583	8600000	41939.9	41942.5	3	5498.86
3485567	57	5.11	6.89063	1	9	0	0	0	0	0	0	0	0	0	0	1	0		0	0	6.875	Male	Other acute hosp/ext care/rehab/geri ctr	G60A	Friday	N	0	0	1	1	1	2	G60	Costing 2014-2015	Dandenong	2100000	8600000	41929.6	41936.5	7	6339.23
3494869	37	5.11	1.87109	0	9	0	0	0	0	0	0	0	0	0	0	1	0		0	0	13.9845	Female	Left against Medical Advice	801A	Sunday	N	0	0	1	1	1	2	801	Costing 2014-2015	Dandenong	4200000	8600000	41943.7	41945.5	2	4165.99
3486672	67	5.11	2.70703	0	9	0	0	0	0	0	0	0	0	0	0	1	0		0	0	2.70833	Female	Private residence/accommodation	G66A	Wednesday	N	0	0	1	1	1	2	G66	Costing 2014-2015	Dandenong	2300000	8600000	41931.9	41934.6	3	2897.09
3490829	24	5.11	2.55469	1	9	0	0	0	0	0	0	0	0	0	0	1	0		0	0	2.54167	Female	Private residence/accommodation	Z63B	Monday	N	0	0	1	0	1	2	Z63	Costing 2014-2015	Dandenong	4200000	8600000	41937	41939.5	3	3472.36
3485790	86	5.11	11.1563	1	9	0	0	0	0	0	0	1	1	0	0	1	0		0	0	11.125	Male	Private residence/accommodation	G01A	Tuesday	Y	1	0	1	1	1	2	G01	Costing 2014-2015	Dandenong	7800000	8600000	41929.5	41940.7	11	22371.6
3484313	63	5.11	13.5547	1	9	0	0	0	0	0	0	0	0	0	0	1	0		0	0	8.50403	Female	Private residence/accommodation	G46A	Wednesday	Y	0	0	1	1	1	2	G46	Costing 2014-2015	Dandenong	4600000	8600000	41928.2	41941.7	13	13985.7
3485938	87	5.11	10.2383	0	9	0	0	0	0	0	0	0	0	0	0	1	0		0	0	13.5319	Male	Other acute hosp/ext care/rehab/geri ctr	G48A	Tuesday	Y	0	0	1	1	1	2	G48	Costing 2014-2015	Dandenong	2500000	8600000	41930.3	41940.5	10	11122.2
3487368	57	5.11	1.03906	0	9	0	0	0	0	0	0	0	0	0	0	1	0		0	0	2.98218	Female	Private residence/accommodation	G65B	Tuesday	N	0	0	1	0	1	2	G65	Costing 2014-2015	Dandenong	7900000	8600000	41932.5	41933.5	1	1061.06
3492117	63	5.11	1.4375	0	9	0	0	0	0	0	0	0	0	0	0	1	0		0	0	1.69683	Female	Private residence/accommodation	L63B	Wednesday	N	0	0	1	0	1	2	L63	Costing 2014-2015	Dandenong	2100000	8600000	41940.1	41941.6	1	2486.64
3489747	51	5.11	1.50781	0	9	0	0	0	0	0	0	0	0	0	0	1	0		0	0	2.12689	Male	Private residence/accommodation	G70B	Saturday	N	0	0	1	0	1	2	G70	Costing 2014-2015	Dandenong	4700000	8600000	41936.1	41937.6	1	1810.03
3494333	40	5.11	17.0508	1	9	0	0	1	0	0	0	0	1	0	0	1	0		0	0	17.0417	Female	Other acute hosp/ext care/rehab/geri ctr	G01A	Sunday	Y	1	0	1	1	1	2	G01	Costing 2014-2015	Dandenong	4300000	8600000	41942.7	41959.7	17	29969.1
3478946	69	5.11	4.99609	0	9	0	0	0	0	0	0	0	0	0	0	1	0		0	0	5.73811	Male	Private residence/accommodation	G65A	Monday	N	0	0	1	1	1	2	G65	Costing 2014-2015	Dandenong	2200000	8600000	41920.5	41925.5	5	4887.1
3490666	63	5.11	5.97266	0	9	0	0	0	0	0	0	0	0	0	0	1	0		0	0	6.59412	Female	Private residence/accommodation	H61A	Friday	Y	0	0	1	1	1	2	H61	Costing 2014-2015	Dandenong	7000000	8600000	41937.5	41943.5	6	10177.5
3492814	51	5.11	2.68359	0	9	0	0	0	0	0	0	0	0	0	0	1	0		0	0	2.70833	Female	Private residence/accommodation	G66A	Friday	N	0	0	1	1	1	2	G66	Costing 2014-2015	Dandenong	213378	8600000	41941.1	41943.8	2	3795.52
3482798	46	5.11	7.07031	0	9	0	0	0	0	0	0	0	0	0	0	1	0		0	0	7.08333	Male	Private residence/accommodation	G47B	Tuesday	N	0	0	1	0	1	2	G47	Costing 2014-2015	Dandenong	832997	8600000	41926.3	41933.4	7	6220.06
3482643	72	5.11	9.27734	0	9	0	0	0	0	0	0	0	0	1	0	1	0		0	0	9.29167	Male	Private residence/accommodation	G01A	Thursday	Y	0	0	1	1	1	2	G01	Costing 2014-2015	Dandenong	809493	8600000	41926.3	41935.6	9	32562.5
3481208	26	5.11	7.17969	0	9	0	0	0	1	0	0	1	2	0	0	1	0		0	0	7.20833	Male	Private residence/accommodation	H62A	Saturday	Y	1	0	1	1	1	2	H62	Costing 2014-2015	Dandenong	370438	8600000	41923.4	41930.6	7	19636.7
3481091	18	5.11	1.55078	1	9	0	0	0	0	0	0	0	0	0	0	1	0		0	0	1.11277	Male	Private residence/accommodation	I76B	Sunday	N	0	0	1	0	1	2	I76	Costing 2014-2015	Dandenong	7100000	8600000	41923.1	41924.7	1	1831.13
3479114	68	5.11	5.07422	0	9	0	0	0	0	0	0	0	0	0	0	1	0		0	0	5.91077	Female	Private residence/accommodation	G46B	Monday	Y	0	0	1	0	1	2	G46	Costing 2014-2015	Dandenong	2500000	8600000	41920.7	41925.8	5	4573.53
3487209	78	5.11	1.94531	0	9	0	0	0	0	0	0	0	0	0	0	1	0		0	0	1.95833	Male	Private residence/accommodation	H62A	Wednesday	N	0	0	1	1	1	2	H62	Costing 2014-2015	Dandenong	7000000	8600000	41932.7	41934.7	2	1937.38
3476572	86	5.11	15.9727	1	9	0	0	0	0	0	0	0	0	0	0	1	0		0	0	8.50827	Female	Private residence/accommodation	X07A	Monday	Y	0	0	1	1	1	2	X07	Costing 2014-2015	Dandenong	2400000	8600000	41916.5	41932.5	16	17584.1
3490698	57	5.11	2.90234	0	9	0	0	0	1	0	0	0	1	1	0	1	0		0	0	6.46603	Male	Private residence/accommodation	H40A	Tuesday	N	1	0	1	1	1	2	H40	Costing 2014-2015	Dandenong	4300000	8600000	41937.7	41940.6	3	6265.32
3485097	67	5.11	24.8359	0	9	0	0	0	0	0	0	0	0	0	0	1	0		19.0153	27382	14.991	Male	Private residence/accommodation	G02A	Monday	Y	0	0	1	1	1	2	G02	Costing 2014-2015	Dandenong	2100000	8600000	41928.8	41953.7	15	23730.4
3490297	66	5.11	12.7734	1	9	0	0	0	0	0	0	0	0	0	0	1	0		0	0	3.38855	Female	Private residence/accommodation	H63B	Thursday	N	0	0	1	0	1	2	H63	Costing 2014-2015	Dandenong	2000000	8600000	41936.8	41949.6	13	11470.5
3492442	17	5.11	1.87109	0	9	0	0	0	0	0	0	0	0	0	0	1	0		0	0	1.875	Female	Private residence/accommodation	G66A	Thursday	N	0	0	1	1	1	2	G66	Costing 2014-2015	Dandenong	851050	8600000	41940.6	41942.4	2	3542.12
3487640	74	5.11	2.12109	0	9	0	0	0	0	0	0	0	0	1	0	1	0		0	0	3.97554	Female	Private residence/accommodation	G47B	Thursday	N	0	0	1	0	1	2	G47	Costing 2014-2015	Dandenong	7700000	8600000	41933.4	41935.5	2	3458.39
3476573	29	5.11	2	0	9	0	0	0	0	0	0	0	0	0	0	1	0		0	0	2	Male	Private residence/accommodation	D04Z	Monday	N	0	0	1	0	1	2	D04	Costing 2014-2015	Dandenong	4400000	8600000	41916.5	41918.5	2	6782.13
3490824	39	5.11	2.78906	0	9	0	0	0	0	0	0	0	0	1	0	1	0		0	0	3.24475	Female	Private residence/accommodation	G47B	Monday	N	0	0	1	0	1	2	G47	Costing 2014-2015	Dandenong	2500000	8600000	41936.9	41939.7	3	3501.19
3494173	54	5.11	3.65625	1	9	0	0	0	0	0	0	0	0	0	0	1	0		0	0	2.12689	Female	Private residence/accommodation	G70B	Monday	N	0	0	1	0	1	2	G70	Costing 2014-2015	Dandenong	2100000	8600000	41942.8	41946.5	4	4540.54
3494158	93	5.11	7.87109	1	9	0	0	0	0	0	0	0	0	1	0	1	0		0	0	7.83333	Female	Aged care residential facility	G48A	Friday	N	0	0	1	1	1	2	G48	Costing 2014-2015	Dandenong	7900000	8600000	41942.7	41950.6	8	6936.46
3485050	55	5.11	5.28906	0	9	0	0	0	0	0	0	0	0	0	0	1	0		0	0	5.29167	Male	Private residence/accommodation	G04A	Wednesday	N	0	0	1	1	1	2	G04	Costing 2014-2015	Dandenong	479229	8600000	41929.3	41934.6	5	14372.4
3489644	36	5.11	1.66406	0	9	0	0	0	0	0	0	0	0	0	0	1	0		0	0	2.91185	Male	Private residence/accommodation	H62B	Saturday	N	0	0	1	0	1	2	H62	Costing 2014-2015	Dandenong	4300000	8600000	41935.8	41937.5	2	1697.72
3481535	66	5.11	3.39844	1	9	0	0	0	0	0	0	0	0	0	0	1	0		0	0	3.375	Male	Private residence/accommodation	D63A	Wednesday	Y	0	0	1	1	1	2	D63	Costing 2014-2015	Dandenong	4500000	8600000	41924.2	41927.6	3	3989.8
3493593	75	5.11	7.34375	0	9	0	0	0	0	0	0	0	0	0	0	1	0		0	0	7.375	Male	Private residence/accommodation	G01A	Thursday	Y	0	0	1	1	1	2	G01	Costing 2014-2015	Dandenong	4100000	8600000	41942.3	41949.6	7	22799.3
3491234	73	5.11	3.14844	1	9	0	0	0	0	0	0	0	0	1	0	1	0		0	0	3.125	Male	Private residence/accommodation	G02A	Thursday	N	0	0	1	1	1	2	G02	Costing 2014-2015	Dandenong	7900000	8600000	41939.3	41942.4	3	5607.37
3492516	87	5.11	2.83594	1	9	0	0	0	0	0	0	0	0	0	0	1	0		0	0	2.83333	Male	Private residence/accommodation	L63B	Friday	N	0	0	1	0	1	2	L63	Costing 2014-2015	Dandenong	7300000	8600000	41940.7	41943.5	3	2570.86
3492750	87	5.11	2.60547	1	9	1	0	0	0	0	0	0	1	0	0	1	0		0	0	2.03663	Male	Death	G70B	Friday	N	1	0	1	0	1	2	G70	Costing 2014-2015	Dandenong	4000000	8600000	41940.9	41943.5	3	3401.63
3492871	65	5.11	6.33984	0	9	0	0	0	0	0	0	0	0	0	0	1	0		0	0	6.375	Male	Private residence/accommodation	G01A	Tuesday	Y	0	0	1	1	1	2	G01	Costing 2014-2015	Dandenong	4400000	8600000	41941.3	41947.6	6	21157.7
3476581	17	5.11	3.10938	1	9	0	0	0	0	0	0	0	0	1	0	1	0		0	0	2.28305	Female	Private residence/accommodation	G47B	Tuesday	N	0	0	1	0	1	2	G47	Costing 2014-2015	Dandenong	885514	8600000	41916.6	41919.7	3	4138.32
3476901	48	5.11	3.48828	0	9	0	0	0	0	0	0	0	0	0	0	1	0		0	0	3.5	Female	Private residence/accommodation	G66A	Wednesday	Y	0	0	1	1	1	2	G66	Costing 2014-2015	Dandenong	2400000	8600000	41917.2	41920.7	3	24730.5
3482515	24	5.11	0.214844	0	9	0	0	0	0	0	0	0	0	1	0	1	0		0	0	0.25	Female	Private residence/accommodation	G66B	Monday	N	0	0	1	0	1	2	G66	Costing 2014-2015	Dandenong	2400000	8600000	41925.4	41925.6	1	223.397
3478544	89	5.11	31.0664	1	9	0	0	0	0	0	0	0	0	0	0	1	0		1.58889	2288	13.9329	Male	Private residence/accommodation	T01A	Friday	Y	0	0	1	1	1	2	T01	Costing 2014-2015	Dandenong	2400000	8600000	41919.5	41950.6	31	43539.5
3495033	22	5.11	4.82422	1	9	0	0	0	0	0	0	0	0	1	0	1	0		0	0	1.63001	Female	Private residence/accommodation	G11Z	Wednesday	N	0	0	1	0	1	2	G11	Costing 2014-2015	Dandenong	7900000	8600000	41943.9	41948.8	5	6475.06
3480344	76	5.11	13.1914	1	9	0	0	1	0	0	0	0	1	0	0	1	0		0	0	3.42316	Male	Private residence/accommodation	G70B	Thursday	Y	1	0	1	0	1	2	G70	Costing 2014-2015	Dandenong	2200000	8600000	41922.5	41935.7	13	16719
3477921	79	5.11	12.6914	0	9	0	0	0	0	0	0	2	2	0	0	1	0		0	0	12.7083	Female	Other acute hosp/ext care/rehab/geri ctr	801A	Saturday	Y	1	0	1	1	1	2	801	Costing 2014-2015	Dandenong	781692	8600000	41918.1	41930.8	12	17996.6
3481815	80	5.11	2.95703	0	9	0	0	0	0	0	0	0	0	0	0	1	0		0	0	4.00045	Female	Private residence/accommodation	E62B	Wednesday	Y	0	0	1	0	1	2	E62	Costing 2014-2015	Dandenong	894838	8600000	41924.6	41927.6	3	3571.23
3492884	26	5.11	1.22656	0	9	0	0	0	0	0	0	0	0	0	0	1	0		0	0	1.25	Male	Private residence/accommodation	G11Z	Thursday	N	0	0	1	0	1	2	G11	Costing 2014-2015	Dandenong	4100000	8600000	41941.3	41942.5	1	3282.54
3482410	49	5.11	3.9375	0	9	0	0	0	0	0	0	0	0	0	0	1	0		0	0	5.04438	Female	Private residence/accommodation	G07A	Friday	Y	0	0	1	1	1	2	G07	Costing 2014-2015	Dandenong	305358	8600000	41925.7	41929.7	4	9230.42
3491860	60	5.11	1.89063	0	9	0	0	0	0	0	0	0	0	0	0	1	0		0	0	5.38993	Male	Private residence/accommodation	X63A	Wednesday	N	0	0	1	1	1	2	X63	Costing 2014-2015	Dandenong	7900000	8600000	41939.8	41941.7	2	3058.67
3480821	67	5.11	0.863281	0	9	0	0	0	0	0	0	0	0	0	0	1	0		0	0	3.12423	Male	Private residence/accommodation	G61B	Saturday	N	0	0	1	0	1	2	G61	Costing 2014-2015	Dandenong	2200000	8600000	41922.7	41923.5	1	1036.98
3490230	78	5.11	0.046875	1	9	0	0	0	0	0	0	0	0	0	0	1	0		0	0	0.041667	Male	Private residence/accommodation	G65A	Friday	N	0	0	1	1	1	2	G65	Costing 2014-2015	Dandenong	4500000	8600000	41936.7	41936.7	1	154.842
3489056	65	5.11	3.46094	1	9	0	0	0	0	0	0	0	0	0	0	1	0		0	0	3.45833	Female	Private residence/accommodation	G02B	Sunday	Y	0	0	1	0	1	2	G02	Costing 2014-2015	Dandenong	2100000	8600000	41935.3	41938.8	3	12508.6
3486424	78	5.11	4.80469	1	9	0	0	0	0	0	0	0	0	0	0	1	0		0	0	4.79167	Male	Other acute hosp/ext care/rehab/geri ctr	Q61A	Friday	N	0	0	1	1	1	2	Q61	Costing 2014-2015	Dandenong	4500000	8600000	41931.6	41936.4	5	5164.23
3477676	47	5.11	3.70703	0	9	0	0	0	0	0	0	0	0	0	0	1	0		0	0	5.00405	Female	Private residence/accommodation	H60B	Friday	Y	0	0	1	0	1	2	H60	Costing 2014-2015	Dandenong	4400000	8600000	41918.8	41922.5	4	3321.31
3489452	53	5.11	1.01953	0	9	0	0	0	0	0	0	0	0	0	0	1	0		0	0	2.96172	Female	Private residence/accommodation	H62B	Friday	N	0	0	1	0	1	2	H62	Costing 2014-2015	Dandenong	275247	8600000	41935.6	41936.6	1	1196.96
3482438	32	5.11	1.73828	0	9	0	0	0	0	0	0	0	0	0	0	1	0		0	0	3.40981	Female	Private residence/accommodation	G11Z	Wednesday	N	0	0	1	0	1	2	G11	Costing 2014-2015	Dandenong	4700000	8600000	41925.8	41927.5	2	4003.85
3489746	54	5.11	4.30859	0	9	0	0	0	0	0	0	0	0	0	0	1	0		0	0	6.40342	Male	Private residence/accommodation	G48A	Tuesday	N	0	0	1	1	1	2	G48	Costing 2014-2015	Dandenong	4300000	8600000	41936.1	41940.4	4	7111.46
3480450	18	5.11	3.98438	1	9	0	0	0	1	0	0	0	1	0	0	1	0		0	0	2.69691	Female	Private residence/accommodation	L63B	Tuesday	N	1	0	1	0	1	2	L63	Costing 2014-2015	Dandenong	7800000	8600000	41922.4	41926.4	4	6835.16
3490266	57	5.11	11.6719	1	9	0	0	0	0	0	0	1	1	0	0	1	0		0	0	11.6667	Male	Private residence/accommodation	G02A	Wednesday	Y	1	0	1	1	1	2	G02	Costing 2014-2015	Dandenong	2100000	8600000	41936.8	41948.4	12	28597.2
3492749	33	5.11	9.68359	1	9	0	0	0	0	0	0	0	0	1	0	1	0		0	0	9.66667	Male	Private residence/accommodation	G47A	Friday	Y	0	0	1	1	1	2	G47	Costing 2014-2015	Dandenong	7900000	8600000	41940.8	41950.5	10	10290.7
3493688	26	5.11	0.449219	1	9	0	0	0	0	0	0	0	0	0	0	1	0		0	0	0.242316	Female	Private residence/accommodation	L65B	Thursday	N	0	0	1	0	1	2	L65	Costing 2014-2015	Dandenong	7700000	8600000	41942.2	41942.7	1	637.029
3481055	45	5.11	2.61328	1	9	0	0	0	1	0	0	0	1	0	0	1	0		0	0	1.26458	Female	Private residence/accommodation	G67B	Monday	N	1	0	1	0	1	2	G67	Costing 2014-2015	Dandenong	382375	8600000	41922.9	41925.5	3	4628.1
3484660	33	5.11	0.117188	0	9	0	0	0	0	0	0	0	0	0	0	1	0		0	0	0.125	Female	Left against Medical Advice	H62B	Thursday	N	0	0	1	0	1	2	H62	Costing 2014-2015	Dandenong	4500000	8600000	41928.5	41928.6	1	196.062
3487495	22	5.11	3.26172	1	9	0	0	0	0	0	0	0	0	0	0	1	0		0	0	2.07196	Female	Private residence/accommodation	G11Z	Friday	N	0	0	1	0	1	2	G11	Costing 2014-2015	Dandenong	7900000	8600000	41933.2	41936.5	3	6981.97
3492069	40	5.11	1.46094	0	9	0	0	0	0	0	0	0	0	0	0	1	0		0	0	3.57599	Female	Private residence/accommodation	H62B	Wednesday	N	0	0	1	0	1	2	H62	Costing 2014-2015	Dandenong	2500000	8600000	41939.9	41941.4	2	1328.24
3494298	19	5.11	3.11328	0	9	0	0	0	0	0	0	0	0	0	0	1	0		0	0	3.125	Female	Private residence/accommodation	H62B	Sunday	N	0	0	1	0	1	2	H62	Costing 2014-2015	Dandenong	7900000	8600000	41942.5	41945.6	3	2622.4
3493691	30	5.11	0.421875	1	9	0	0	0	0	0	0	0	0	0	0	1	0		0	0	0.259549	Female	Private residence/accommodation	O63Z	Thursday	N	0	0	1	0	1	2	O63	Costing 2014-2015	Dandenong	7100000	8600000	41942.2	41942.7	1	667.691
3491897	74	5.11	2.03516	0	9	0	0	0	0	0	0	0	0	1	0	1	0		0	0	6.31786	Male	Left against Medical Advice	G67A	Wednesday	N	0	0	1	1	1	2	G67	Costing 2014-2015	Dandenong	760643	8600000	41939.8	41941.9	2	2049.66
3492879	79	5.11	5.64453	1	9	0	0	0	0	0	0	0	0	0	0	1	0		0	0	3.33332	Female	Private residence/accommodation	H62B	Monday	N	0	0	1	0	1	2	H62	Costing 2014-2015	Dandenong	270221	8600000	41940.9	41946.5	6	4561.82
3490963	80	5.11	17.6797	1	9	0	0	0	0	0	0	1	1	0	0	1	0		0	0	17.6667	Female	Other acute hosp/ext care/rehab/geri ctr	G01A	Wednesday	Y	1	0	1	1	1	2	G01	Costing 2014-2015	Dandenong	7900000	8600000	41938	41955.7	18	31023.4
3476680	26	5.11	6.00781	1	9	0	0	0	0	0	0	0	0	1	0	1	0		0	0	0.959188	Female	Private residence/accommodation	G67B	Friday	N	0	0	1	0	1	2	G67	Costing 2014-2015	Dandenong	7100000	8600000	41916.7	41922.7	6	14016.7
3478472	71	5.11	2.71875	0	9	0	0	0	1	0	0	0	1	1	0	1	0		0	0	6.80158	Male	Private residence/accommodation	G47A	Friday	N	1	0	1	1	1	2	G47	Costing 2014-2015	Dandenong	2300000	8600000	41919.7	41922.4	3	3131.01
3493581	91	5.11	0.828125	0	9	0	0	0	0	0	0	0	0	0	0	1	0		0	0	3.22389	Male	Private residence/accommodation	J65A	Thursday	Y	0	0	1	1	1	2	J65	Costing 2014-2015	Dandenong	2100000	8600000	41941.8	41942.7	1	2091.23
3481431	21	5.11	1.0625	0	9	0	0	0	0	0	0	0	0	1	0	1	0		0	0	1.21268	Female	Private residence/accommodation	G70B	Sunday	N	0	0	1	0	1	2	G70	Costing 2014-2015	Dandenong	4400000	8600000	41923.6	41924.7	1	884.708
3489231	27	5.11	0.875	0	9	0	0	0	0	0	0	0	0	0	0	1	0		0	0	0.875	Male	Private residence/accommodation	H63B	Friday	N	0	0	1	0	1	2	H63	Costing 2014-2015	Dandenong	7100000	8600000	41935.5	41936.4	1	1651.19
3486282	73	5.11	6.76172	1	9	0	0	0	0	0	0	0	0	0	0	1	0		0	0	3.85913	Male	Private residence/accommodation	G48B	Saturday	Y	0	0	1	0	1	2	G48	Costing 2014-2015	Dandenong	4600000	8600000	41930.8	41937.6	7	8664.11
3483280	70	5.11	1.30469	0	9	0	0	0	0	0	0	0	0	0	0	1	0		0	0	1.33333	Male	Private residence/accommodation	H62B	Wednesday	N	0	0	1	0	1	2	H62	Costing 2014-2015	Dandenong	2400000	8600000	41926.3	41927.6	1	1322.46
3479918	83	5.11	15.2383	0	9	0	0	0	1	0	0	1	2	0	0	1	0		0	0	15.25	Male	Private residence/accommodation	G01A	Friday	Y	1	0	1	1	1	2	G01	Costing 2014-2015	Dandenong	7900000	8600000	41921.3	41936.5	15	51017.6
3490823	57	5.11	1.54688	1	9	0	0	0	0	0	0	0	0	0	0	1	0		0	0	1.54167	Male	Private residence/accommodation	G65B	Sunday	N	0	0	1	0	1	2	G65	Costing 2014-2015	Dandenong	4400000	8600000	41936.9	41938.5	2	1432.2
3477718	65	5.11	2.71094	0	9	0	0	0	0	0	0	0	0	0	0	1	0		0	0	3.91694	Male	Private residence/accommodation	G65A	Wednesday	N	0	0	1	1	1	2	G65	Costing 2014-2015	Dandenong	4100000	8600000	41917.9	41920.6	3	4489.4
3488569	59	5.11	1.88672	1	9	0	0	0	0	0	0	0	0	0	0	1	0		0	0	1.875	Female	Private residence/accommodation	G70B	Friday	Y	0	0	1	0	1	2	G70	Costing 2014-2015	Dandenong	4300000	8600000	41934.6	41936.4	2	1796.35
3481111	25	5.11	0.457031	0	9	0	0	0	0	0	0	0	0	0	0	1	0		0	0	0.5	Male	Left against Medical Advice	G66B	Saturday	N	0	0	1	0	1	2	G66	Costing 2014-2015	Dandenong	4300000	8600000	41923.3	41923.7	1	882.704
3491060	73	5.11	1.23828	1	9	0	0	0	0	0	0	0	0	0	0	1	0		0	0	1.20833	Female	Private residence/accommodation	G46A	Monday	N	0	0	1	1	1	2	G46	Costing 2014-2015	Dandenong	2400000	8600000	41938.5	41939.7	1	2691.73
3483165	49	5.11	2.70703	1	9	0	0	0	0	0	0	0	0	1	0	1	0		0	0	2.2066	Female	Private residence/accommodation	G47B	Friday	N	0	0	1	0	1	2	G47	Costing 2014-2015	Dandenong	2200000	8600000	41926.9	41929.6	3	5952.78
3477201	58	5.11	2.25781	0	9	0	0	0	0	0	0	0	0	0	0	1	0		0	0	2.29167	Male	Private residence/accommodation	G11Z	Wednesday	N	0	0	1	0	1	2	G11	Costing 2014-2015	Dandenong	2500000	8600000	41918.3	41920.5	2	4851.01
3487235	75	5.11	2.15625	1	9	0	0	0	0	0	0	0	0	0	0	1	0		0	0	2.08108	Male	Left against Medical Advice	G60B	Wednesday	N	0	0	1	0	1	2	G60	Costing 2014-2015	Dandenong	4500000	8600000	41932.8	41934.9	2	1911.98
3477423	23	5.11	5.10547	1	9	0	0	0	0	0	0	0	0	0	0	1	0		0	0	1.56751	Female	Left against Medical Advice	H64B	Saturday	N	0	0	1	0	1	2	H64	Costing 2014-2015	Dandenong	2400000	8600000	41918.5	41923.6	5	4200.06
3487406	52	5.11	5.73828	1	9	0	0	0	0	0	0	0	0	0	0	1	0		0	0	3.01673	Female	Private residence/accommodation	G70B	Sunday	N	0	0	1	0	1	2	G70	Costing 2014-2015	Dandenong	4100000	8600000	41932.9	41938.6	6	9655.45
3491820	65	5.11	18.9336	0	9	0	0	0	1	0	0	0	1	0	0	1	0		0	0	18.9583	Male	Other acute hosp/ext care/rehab/geri ctr	A06C	Saturday	Y	1	0	1	0	1	2	A06	Costing 2014-2015	Dandenong	2200000	8600000	41939.7	41958.6	19	81937.9
3494079	58	5.11	8.13281	1	9	0	0	0	0	0	0	0	0	0	0	1	0		0	0	6.08431	Female	Private residence/accommodation	J64A	Friday	N	0	0	1	1	1	2	J64	Costing 2014-2015	Dandenong	1000000	8600000	41942.6	41950.7	8	10115.1
3480923	53	5.11	2.69141	1	9	0	0	0	0	0	0	0	0	1	0	1	0		0	0	1.77116	Male	Private residence/accommodation	G11Z	Monday	N	0	0	1	0	1	2	G11	Costing 2014-2015	Dandenong	7400000	8600000	41922.8	41925.5	3	4252.25
3491112	74	5.11	3.10156	0	9	0	0	0	0	0	0	0	0	0	0	1	0		0	0	6.31786	Female	Private residence/accommodation	G67A	Wednesday	N	0	0	1	1	1	2	G67	Costing 2014-2015	Dandenong	7900000	8600000	41938.7	41941.8	3	3462.03
3492059	71	5.11	1.29297	1	9	0	0	0	0	0	0	0	0	0	0	1	0		0	0	1.29167	Male	Private residence/accommodation	G04B	Wednesday	N	0	0	1	0	1	2	G04	Costing 2014-2015	Dandenong	2300000	8600000	41940.3	41941.6	1	4991.4
3477503	47	5.11	1.08203	0	9	0	0	0	0	0	0	0	0	0	0	1	0		0	0	1.77556	Female	Private residence/accommodation	H64B	Tuesday	N	0	0	1	0	1	2	H64	Costing 2014-2015	Dandenong	378002	8600000	41918.6	41919.7	1	1111.81
3479740	42	5.11	4.28906	0	9	0	0	0	0	0	0	0	0	0	0	1	0		0	0	4.29167	Female	Private residence/accommodation	G01B	Sunday	Y	0	0	1	0	1	2	G01	Costing 2014-2015	Dandenong	4400000	8600000	41920.3	41924.6	4	11052.1
3479657	36	5.11	14.6797	1	9	0	0	1	0	0	0	0	1	0	0	1	0		0	0	6.61414	Male	Private residence/accommodation	H63A	Friday	Y	1	0	1	1	1	2	H63	Costing 2014-2015	Dandenong	448253	8600000	41921.7	41936.4	15	16546.9
3488921	34	5.11	1.80469	0	9	0	0	0	0	0	0	0	0	0	0	1	0		0	0	4.55301	Male	Private residence/accommodation	Q61A	Friday	N	0	0	1	1	1	2	Q61	Costing 2014-2015	Dandenong	2500000	8600000	41934.9	41936.7	2	8671.54
3491856	82	5.11	3.57813	0	9	0	0	0	0	0	0	0	0	0	0	1	0		0	0	4.70994	Female	Private residence/accommodation	G47B	Friday	N	0	0	1	0	1	2	G47	Costing 2014-2015	Dandenong	4500000	8600000	41939.8	41943.4	4	3487.14
3481020	45	5.11	13.5352	1	9	0	0	0	0	0	0	0	0	1	0	1	0		0	0	9.19328	Female	Private residence/accommodation	G46A	Friday	N	0	0	1	1	1	2	G46	Costing 2014-2015	Dandenong	2100000	8600000	41923	41936.6	13	15456.3
3492868	56	5.11	2.33594	1	9	0	0	0	0	0	0	0	0	0	0	1	0		0	0	2.33333	Male	Private residence/accommodation	G12C	Friday	N	0	0	1	0	1	2	G12	Costing 2014-2015	Dandenong	7900000	8600000	41941.2	41943.6	2	5009.83
3481827	45	5.11	9.86719	1	9	0	0	0	0	0	0	0	0	1	0	1	0		0	0	6.3145	Male	Private residence/accommodation	H40A	Wednesday	N	0	0	1	1	1	2	H40	Costing 2014-2015	Dandenong	2300000	8600000	41924.7	41934.6	10	10525.3
3477769	74	5.11	8.30078	1	9	0	0	0	0	0	0	0	0	0	0	1	0		0	0	8.29167	Female	Private residence/accommodation	G01A	Tuesday	Y	0	0	1	1	1	2	G01	Costing 2014-2015	Dandenong	7700000	8600000	41918.3	41926.6	8	21682.5
3487459	91	5.11	1.52344	0	9	0	0	0	0	0	0	0	0	0	0	1	0		0	0	3.38953	Male	Private residence/accommodation	L63A	Wednesday	N	0	0	1	1	1	2	L63	Costing 2014-2015	Dandenong	7900000	8600000	41933	41934.6	1	2168.18
3481722	24	5.11	0.789063	0	9	0	0	0	0	0	0	0	0	0	0	1	0		0	0	0.791667	Male	Private residence/accommodation	I74B	Monday	N	0	0	1	0	1	2	I74	Costing 2014-2015	Dandenong	7300000	8600000	41924.7	41925.4	1	1419.86
3484138	44	5.11	1.28125	0	9	0	0	0	0	0	0	0	0	0	0	1	0		0	0	1.29167	Female	Private residence/accommodation	G67B	Thursday	N	0	0	1	0	1	2	G67	Costing 2014-2015	Dandenong	4600000	8600000	41927.4	41928.7	1	1355.49
3490764	17	5.11	4.84766	1	9	0	0	0	0	0	0	0	0	0	0	1	0		0	0	2.6373	Male	Private residence/accommodation	X06A	Thursday	N	0	0	1	1	1	2	X06	Costing 2014-2015	Dandenong	7900000	8600000	41937.6	41942.5	5	13342.6
3483055	52	5.11	2.98438	0	9	0	0	0	0	0	0	0	0	0	0	1	0		0	0	3.51202	Male	Private residence/accommodation	H08B	Friday	N	0	0	1	0	1	2	H08	Costing 2014-2015	Dandenong	4600000	8600000	41926.5	41929.5	3	5633.22
3494939	42	5.11	9.91406	0	9	0	0	0	0	0	0	0	0	0	0	1	0		0	0	9.91667	Male	Private residence/accommodation	G12C	Monday	N	0	0	1	0	1	2	G12	Costing 2014-2015	Dandenong	4400000	8600000	41943.7	41953.6	10	12797.8
3480202	53	5.11	4.34766	0	9	0	0	0	0	0	0	0	0	1	0	1	0		0	0	5.38993	Male	Private residence/accommodation	X63A	Tuesday	Y	0	0	1	1	1	2	X63	Costing 2014-2015	Dandenong	2200000	8600000	41922.2	41926.6	4	5621.98
3486752	38	5.11	2.22656	1	9	0	0	0	0	0	0	0	0	0	0	1	0		0	0	2.20833	Female	Private residence/accommodation	G11Z	Wednesday	Y	0	0	1	0	1	2	G11	Costing 2014-2015	Dandenong	4100000	8600000	41932.3	41934.5	2	3787.52
3478614	46	5.11	1.15625	0	9	0	0	0	0	0	0	0	0	0	0	1	0		0	0	5.55986	Female	Private residence/accommodation	I76A	Wednesday	N	0	0	1	1	1	2	I76	Costing 2014-2015	Dandenong	2500000	8600000	41919.7	41920.8	1	2856.67
3490162	31	5.11	0.976563	0	9	0	0	0	0	0	0	0	0	0	0	1	0		0	0	2.4696	Female	Private residence/accommodation	J64B	Saturday	N	0	0	1	0	1	2	J64	Costing 2014-2015	Dandenong	7000000	8600000	41936.6	41937.6	1	2464.16
3493633	66	5.11	4.54297	1	9	0	0	0	0	0	0	0	0	0	0	1	0		0	0	2.00274	Female	Private residence/accommodation	G70B	Monday	N	0	0	1	0	1	2	G70	Costing 2014-2015	Dandenong	4600000	8600000	41941.9	41946.5	5	5274.06
3476852	37	5.11	4.82031	0	9	0	0	0	0	0	0	0	0	0	0	1	0		0	0	4.9186	Female	Private residence/accommodation	H08B	Thursday	N	0	0	1	0	1	2	H08	Costing 2014-2015	Dandenong	4400000	8600000	41917	41921.8	5	10278.6
3479908	22	5.11	5.23047	1	9	0	0	0	1	0	0	0	1	0	0	1	0		0	0	5.20833	Female	Private residence/accommodation	G66A	Tuesday	N	1	0	1	1	1	2	G66	Costing 2014-2015	Dandenong	2400000	8600000	41921.1	41926.3	5	7740.01
3490749	72	5.11	2.87109	0	9	0	0	0	0	0	0	0	0	1	0	1	0		0	0	3.59792	Male	Private residence/accommodation	L63B	Tuesday	N	0	0	1	0	1	2	L63	Costing 2014-2015	Dandenong	809493	8600000	41937.6	41940.5	3	3242.61
3481254	42	5.11	1.67188	0	9	0	0	0	0	0	0	0	0	0	0	1	0		0	0	3.12541	Male	Private residence/accommodation	H08B	Sunday	N	0	0	1	0	1	2	H08	Costing 2014-2015	Dandenong	7900000	8600000	41922.9	41924.6	2	5598.64
3483752	58	5.11	5.01172	1	9	0	0	0	0	0	0	0	0	0	0	1	0		0	0	5	Male	Private residence/accommodation	G01A	Monday	Y	0	0	1	1	1	2	G01	Costing 2014-2015	Dandenong	7800000	8600000	41927.5	41932.5	5	13088.1
3491075	82	5.11	8.17188	1	9	0	0	0	0	0	0	0	0	0	0	1	0		0	0	4.48256	Female	Private residence/accommodation	N62Z	Monday	Y	0	0	1	0	1	2	N62	Costing 2014-2015	Dandenong	2500000	8600000	41938.5	41946.7	8	8353.36
3490294	23	5.11	1.76172	0	9	0	0	0	0	0	0	0	0	0	0	1	0		0	0	1.77177	Male	Private residence/accommodation	G07B	Sunday	N	0	0	1	0	1	2	G07	Costing 2014-2015	Dandenong	417654	8600000	41936.8	41938.5	2	4924.82
3485575	56	5.11	8.04297	0	9	0	0	0	0	0	0	0	0	0	0	1	0		0	0	8.50403	Male	Private residence/accommodation	G46A	Saturday	Y	0	0	1	1	1	2	G46	Costing 2014-2015	Dandenong	2200000	8600000	41929.7	41937.7	8	30798.1
3484267	78	5.11	15.2266	0	9	0	0	2	0	0	0	0	2	0	0	1	0		0	0	15.25	Female	Statistical Separation	G02A	Friday	Y	1	0	1	1	1	2	G02	Costing 2014-2015	Dandenong	7300000	8600000	41928.3	41943.5	15	56417.4
3479818	57	5.11	2.08203	0	9	0	0	0	0	0	0	0	0	0	0	1	0		0	0	2.61239	Male	Private residence/accommodation	G65B	Friday	N	0	0	1	0	1	2	G65	Costing 2014-2015	Dandenong	2400000	8600000	41920.5	41922.6	2	2735.39
3478594	47	5.11	16.8633	1	9	0	0	0	0	0	0	0	0	0	0	1	0		0	0	7.12289	Female	Private residence/accommodation	H60A	Friday	Y	0	0	1	1	1	2	H60	Costing 2014-2015	Dandenong	2000000	8600000	41919.7	41936.5	17	27384
3485876	23	5.11	17.6484	0	9	0	0	0	0	0	0	0	0	0	0	1	0		4.98611	7180	12.6806	Male	Private residence/accommodation	T01A	Tuesday	N	0	0	1	1	1	2	T01	Costing 2014-2015	Dandenong	2400000	8600000	41930	41947.7	17	19428.1
3489478	55	5.11	12.9609	1	9	0	0	0	0	0	0	0	0	0	0	1	0		0	0	4.89355	Female	Private residence/accommodation	H63B	Wednesday	N	0	0	1	0	1	2	H63	Costing 2014-2015	Dandenong	4500000	8600000	41935.7	41948.7	13	12456.3
3516260	43	4.51	3.05859	1	10	0	0	0	0	0	0	0	0	1	0	1	0		0	0	2.68486	Male	Private residence/accommodation	X63A	Friday	N	0	0	1	1	1	2	X63	Costing 2014-2015	Dandenong	4400000	8600000	41975.6	41978.6	3	4209.39
3510746	26	4.51	9.84766	1	10	0	0	0	0	0	0	0	0	0	0	1	0		0	0	9.83333	Female	Private residence/accommodation	H62A	Thursday	N	0	0	1	1	1	2	H62	Costing 2014-2015	Dandenong	4400000	8600000	41967.8	41977.6	10	9591.51
3502302	61	4.51	5.08984	1	10	0	0	0	0	0	0	0	0	1	0	1	0		0	0	4.95311	Male	Private residence/accommodation	G46B	Monday	N	0	0	1	0	1	2	G46	Costing 2014-2015	Dandenong	7900000	8600000	41955.5	41960.6	5	5424.58
3508953	44	4.51	3.11328	0	10	0	0	0	0	0	0	0	0	0	0	1	0		0	0	6.86277	Female	Private residence/accommodation	G47A	Monday	N	0	0	1	1	1	2	G47	Costing 2014-2015	Dandenong	4000000	8600000	41964.6	41967.7	3	3511.77
3506846	74	4.51	4.15234	1	10	0	0	0	0	0	0	0	0	0	0	1	0		0	0	4.13842	Male	Private residence/accommodation	G47B	Sunday	N	0	0	1	0	1	2	G47	Costing 2014-2015	Dandenong	797300	8600000	41962.3	41966.4	4	6171.32
3496773	73	4.51	3.00781	1	10	0	0	0	0	0	0	0	0	0	0	1	0		0	0	3	Male	Private residence/accommodation	B07B	Friday	N	0	0	1	0	1	2	B07	Costing 2014-2015	Dandenong	7200000	8600000	41947.3	41950.3	3	4751.74
3513965	68	4.51	1.9375	0	10	0	0	0	0	0	0	0	0	0	0	1	0		0	0	3.02675	Male	Private residence/accommodation	G70B	Sunday	N	0	0	1	0	1	2	G70	Costing 2014-2015	Dandenong	407044	8600000	41971.6	41973.5	2	2092.98
3499617	56	4.51	0.550781	1	10	0	0	0	0	0	0	0	0	0	0	1	0		0	0	0.541667	Male	Private residence/accommodation	Q62A	Saturday	N	0	0	1	1	1	2	Q62	Costing 2014-2015	Dandenong	7900000	8600000	41950.9	41951.5	1	676.921
3513968	53	4.51	5.10938	1	10	0	0	0	0	0	0	0	0	1	0	1	0		0	0	5.08333	Female	Private residence/accommodation	G66A	Wednesday	N	0	0	1	1	1	2	G66	Costing 2014-2015	Dandenong	2300000	8600000	41971.6	41976.7	5	4508.9
3502550	21	4.51	1.69531	0	10	0	0	0	0	0	0	0	0	0	0	1	0		0	0	3.36465	Female	Private residence/accommodation	O61Z	Friday	N	0	0	1	0	1	2	O61	Costing 2014-2015	Dandenong	2500000	8600000	41955.7	41957.4	2	2879.86
3501227	68	4.51	7.50391	0	10	0	0	0	0	0	0	0	0	1	0	1	0		0	0	16.0765	Male	Aged care residential facility	G48A	Tuesday	N	0	0	1	1	1	2	G48	Costing 2014-2015	Dandenong	2400000	8600000	41954	41961.5	7	8260.75
3511588	77	4.51	1.85938	0	10	0	0	0	2	0	0	0	2	0	0	1	0		0	0	2.34832	Male	Private residence/accommodation	G11Z	Thursday	N	1	0	1	0	1	2	G11	Costing 2014-2015	Dandenong	2300000	8600000	41968.6	41970.5	2	3438.82
3518261	47	4.51	0.960938	1	10	0	0	0	0	0	0	0	0	0	0	1	0		0	0	0.958333	Male	Private residence/accommodation	L64B	Friday	N	0	0	1	0	1	2	L64	Costing 2014-2015	Dandenong	7300000	8600000	41977.9	41978.8	1	1473.31
3510179	61	4.51	1.5	0	10	0	0	0	0	0	0	0	0	0	0	1	0		0	0	1.84095	Female	Private residence/accommodation	G61B	Tuesday	N	0	0	1	0	1	2	G61	Costing 2014-2015	Dandenong	7900000	8600000	41967.1	41968.6	1	1363.43
3517481	36	4.51	1.78906	0	10	0	0	0	0	0	0	0	0	0	0	1	0		0	0	1.79167	Female	Private residence/accommodation	N07A	Friday	N	0	0	1	1	1	2	N07	Costing 2014-2015	Dandenong	7000000	8600000	41976.9	41978.7	2	3103.19
3512687	47	4.51	1.19141	1	10	0	0	0	0	0	0	0	0	1	0	1	0		0	0	1.16667	Female	Private residence/accommodation	G48B	Friday	N	0	0	1	0	1	2	G48	Costing 2014-2015	Dandenong	2000000	8600000	41970.3	41971.5	1	2574.84
3503675	32	4.51	4.46875	1	10	0	0	0	0	0	0	0	0	0	0	1	0		0	0	1.43218	Female	Other acute hosp/ext care/rehab/geri ctr	H64B	Tuesday	N	0	0	1	0	1	2	H64	Costing 2014-2015	Dandenong	4400000	8600000	41957	41961.5	4	4190.81
3510909	68	4.51	3.21094	0	10	0	0	0	0	0	0	0	0	0	0	1	0		0	0	3.25	Female	Private residence/accommodation	G02B	Friday	Y	0	0	1	0	1	2	G02	Costing 2014-2015	Dandenong	7100000	8600000	41968.3	41971.5	3	8348.03
3515743	46	4.51	4.82813	1	10	0	0	0	0	0	0	0	0	1	0	1	0		0	0	4.08776	Female	Private residence/accommodation	G67A	Saturday	N	0	0	1	1	1	2	G67	Costing 2014-2015	Dandenong	7500000	8600000	41974.7	41979.6	5	6196.46
3514043	57	4.51	3.82031	0	10	0	0	0	0	0	0	0	0	0	0	1	0		0	0	3.83333	Male	Private residence/accommodation	Z61A	Tuesday	N	0	0	1	1	1	2	Z61	Costing 2014-2015	Dandenong	7900000	8600000	41971.7	41975.5	4	3934.62
3514977	80	4.51	2.76172	0	10	0	0	0	0	0	0	0	0	0	0	1	0		0	0	2.79167	Female	Private residence/accommodation	G66A	Wednesday	N	0	0	1	1	1	2	G66	Costing 2014-2015	Dandenong	706337	8600000	41973.9	41976.6	3	2584.76
3515852	78	4.51	6.43359	0	10	0	0	0	0	0	0	0	0	0	0	1	0		0	0	6.45833	Female	Other acute hosp/ext care/rehab/geri ctr	G02A	Monday	Y	0	0	1	1	1	2	G02	Costing 2014-2015	Dandenong	2400000	8600000	41975.3	41981.7	6	16013.1
3518747	74	4.51	3.50391	1	10	0	0	0	0	0	0	0	0	0	0	1	0		0	0	2.63327	Male	Private residence/accommodation	G61B	Tuesday	N	0	0	1	0	1	2	G61	Costing 2014-2015	Dandenong	7900000	8600000	41978.9	41982.4	4	3486.6
3503322	84	4.51	7.67969	0	10	0	0	0	0	0	0	0	0	0	0	1	0		0	0	7.70833	Male	Private residence/accommodation	G47B	Friday	Y	0	0	1	0	1	2	G47	Costing 2014-2015	Dandenong	2000000	8600000	41956.8	41964.5	8	7897.35
3505206	33	4.51	4.26953	1	10	0	0	0	0	0	0	0	0	1	0	1	0		0	0	4.25	Male	Private residence/accommodation	G02A	Friday	Y	0	0	1	1	1	2	G02	Costing 2014-2015	Dandenong	4700000	8600000	41960.3	41964.6	4	11984.1
3496533	42	4.51	1.95313	0	10	0	0	0	0	0	0	0	0	0	0	1	0		0	0	3.05623	Female	Left against Medical Advice	G61A	Wednesday	N	0	0	1	1	1	2	G61	Costing 2014-2015	Dandenong	1000000	8600000	41946.9	41948.8	2	1959.89
3517640	52	4.51	1.12109	0	10	0	0	0	0	0	0	0	0	0	0	1	0		0	0	3.64808	Male	Private residence/accommodation	G46B	Friday	N	0	0	1	0	1	2	G46	Costing 2014-2015	Dandenong	7900000	8600000	41977.4	41978.5	1	1743.37
3498537	44	4.51	5.74219	1	10	0	0	0	1	0	0	0	1	0	0	1	0		0	0	3.76556	Male	Private residence/accommodation	E67A	Wednesday	N	1	0	1	1	1	2	E67	Costing 2014-2015	Dandenong	4300000	8600000	41949.9	41955.6	6	10500
3501319	77	4.51	1.20703	0	10	0	0	0	0	0	0	0	0	1	0	1	0		0	0	1.20833	Male	Private residence/accommodation	G10A	Wednesday	N	0	0	1	1	1	2	G10	Costing 2014-2015	Dandenong	4600000	8600000	41954.3	41955.5	1	5436.98
3515862	65	4.51	2.44531	0	10	0	0	0	0	0	0	0	0	0	0	1	0		0	0	3.02675	Female	Private residence/accommodation	G70B	Thursday	Y	0	0	1	0	1	2	G70	Costing 2014-2015	Dandenong	7900000	8600000	41975	41977.5	2	2358.64
3511326	63	4.51	8.92969	0	10	0	0	0	0	0	0	0	0	1	0	1	0		0	0	8.95833	Male	Private residence/accommodation	G60A	Thursday	N	0	0	1	1	1	2	G60	Costing 2014-2015	Dandenong	807097	8600000	41968.7	41977.6	9	7762.61
3509315	41	4.51	3.65625	0	10	0	0	0	1	0	0	0	1	0	0	1	0		0	0	3.70378	Male	Private residence/accommodation	G47B	Tuesday	N	1	0	1	0	1	2	G47	Costing 2014-2015	Dandenong	7000000	8600000	41965	41968.6	4	4363.66
3514826	65	4.51	2.35156	0	10	0	0	0	0	0	0	0	0	0	0	1	0		0	0	6.31575	Male	Private residence/accommodation	G11Z	Tuesday	Y	0	0	1	0	1	2	G11	Costing 2014-2015	Dandenong	2400000	8600000	41973.4	41975.7	2	3932.51
3500885	51	4.51	5.92188	0	10	0	0	0	0	0	0	0	0	0	0	1	0		0	0	15.3274	Female	Private residence/accommodation	G02A	Sunday	N	0	0	1	1	1	2	G02	Costing 2014-2015	Dandenong	7900000	8600000	41953.6	41959.5	6	14830.4
3495466	48	4.51	12.8867	1	10	0	0	1	0	0	0	0	1	0	0	1	0		0	0	12.875	Male	Private residence/accommodation	G02A	Friday	Y	1	0	1	1	1	2	G02	Costing 2014-2015	Dandenong	4400000	8600000	41944.5	41957.4	13	19033.9
3517446	44	4.51	4.84766	1	10	0	0	0	0	0	0	0	0	0	0	1	0		0	0	4.83333	Male	Private residence/accommodation	G70A	Monday	N	0	0	1	1	1	2	G70	Costing 2014-2015	Dandenong	4500000	8600000	41976.8	41981.6	5	4456.35
3513363	83	4.51	1.78906	0	10	0	0	0	0	0	0	0	0	0	0	1	0		0	0	1.92015	Female	Private residence/accommodation	G70B	Saturday	Y	0	0	1	0	1	2	G70	Costing 2014-2015	Dandenong	2000000	8600000	41970.8	41972.6	2	2275.06
3502627	86	4.51	7.65234	0	10	0	0	0	0	0	0	1	1	1	0	1	0		0	0	7.66667	Male	Private residence/accommodation	G01A	Thursday	Y	1	0	1	1	1	2	G01	Costing 2014-2015	Dandenong	2400000	8600000	41955.9	41963.6	8	22147
3503626	25	4.51	0.59375	1	10	0	0	0	0	0	0	0	0	0	0	1	0		0	0	0.322117	Male	Other acute hosp/ext care/rehab/geri ctr	G65B	Friday	N	0	0	1	0	1	2	G65	Costing 2014-2015	Dandenong	2500000	8600000	41957.1	41957.7	1	1623.55
3496400	26	4.51	0.789063	0	10	0	0	0	0	0	0	0	0	0	0	1	0		0	0	0.791667	Female	Private residence/accommodation	G67B	Tuesday	N	0	0	1	0	1	2	G67	Costing 2014-2015	Dandenong	7900000	8600000	41946.6	41947.4	1	721.09
3495709	30	4.51	4.60547	0	10	0	0	0	1	0	0	0	1	0	0	1	0		0	0	7.06248	Female	Private residence/accommodation	Q60A	Thursday	N	1	0	1	1	1	2	Q60	Costing 2014-2015	Dandenong	4600000	8600000	41944.9	41949.5	5	5767.46
3502050	65	4.51	14.2148	1	10	0	0	0	0	0	0	0	0	1	0	1	0		0	0	14.2083	Female	Private residence/accommodation	G01A	Wednesday	Y	0	0	1	1	1	2	G01	Costing 2014-2015	Dandenong	7200000	8600000	41955.2	41969.4	14	20707.4
3504841	65	4.51	15.0664	1	10	1	0	0	1	0	0	1	3	0	0	1	0		0	0	6.35728	Male	Death	T60A	Monday	N	1	0	1	1	1	2	T60	Costing 2014-2015	Dandenong	4400000	8600000	41959	41974.1	16	18948.7
3515981	21	4.51	1.26953	1	10	0	0	0	0	0	0	0	0	0	0	1	0		0	0	0.959188	Female	Private residence/accommodation	G67B	Wednesday	N	0	0	1	0	1	2	G67	Costing 2014-2015	Dandenong	2400000	8600000	41975.3	41976.6	1	1162.07
3504215	43	4.51	4.84766	1	10	0	0	0	0	0	0	0	0	1	0	1	0		0	0	2.2066	Male	Private residence/accommodation	G47B	Wednesday	Y	0	0	1	0	1	2	G47	Costing 2014-2015	Dandenong	4400000	8600000	41957.8	41962.6	5	5279.57
3498801	89	4.51	4.62109	0	10	0	0	0	0	0	0	0	0	0	0	1	0		0	0	6.47483	Female	Private residence/accommodation	Q61A	Tuesday	N	0	0	1	1	1	2	Q61	Costing 2014-2015	Dandenong	2400000	8600000	41950.1	41954.8	4	4318.08
3506728	62	4.51	1.89453	1	10	0	0	0	0	0	0	0	0	0	0	1	0		0	0	1.875	Male	Aged care residential facility	Q61B	Thursday	N	0	0	1	0	1	2	Q61	Costing 2014-2015	Dandenong	7100000	8600000	41961.6	41963.5	2	1589.18
3516941	55	4.51	6.02344	1	10	0	0	0	0	0	0	0	0	0	0	1	0		0	0	6	Male	Private residence/accommodation	G01A	Tuesday	N	0	0	1	1	1	2	G01	Costing 2014-2015	Dandenong	2200000	8600000	41976.5	41982.5	6	18595.4
3497901	55	4.51	4.93359	1	10	0	0	0	0	0	0	0	0	0	0	1	0		0	0	4.91667	Male	Left against Medical Advice	H62B	Monday	N	0	0	1	0	1	2	H62	Costing 2014-2015	Dandenong	7900000	8600000	41948.7	41953.6	5	4890.74
3505294	74	4.51	8.26172	1	10	0	0	0	0	0	0	0	0	0	0	1	0		0	0	8.25	Male	Private residence/accommodation	G01B	Tuesday	Y	0	0	1	0	1	2	G01	Costing 2014-2015	Dandenong	389407	8600000	41960.3	41968.6	8	14145.9
3497749	60	4.51	1.85156	1	10	0	0	0	0	0	0	0	0	0	0	1	0		0	0	1.83333	Male	Other acute hosp/ext care/rehab/geri ctr	G46B	Friday	N	0	0	1	0	1	2	G46	Costing 2014-2015	Dandenong	2400000	8600000	41949	41950.8	2	3263.02
3510952	33	4.51	1.47266	0	10	0	0	0	0	0	0	0	0	1	0	1	0		0	0	2.28305	Male	Private residence/accommodation	G47B	Wednesday	N	0	0	1	0	1	2	G47	Costing 2014-2015	Dandenong	4700000	8600000	41968	41969.5	1	1799.94
3509763	51	4.51	2.37891	1	10	0	0	0	0	0	0	0	0	0	0	1	0		0	0	1.69683	Male	Private residence/accommodation	L63B	Tuesday	N	0	0	1	0	1	2	L63	Costing 2014-2015	Dandenong	4300000	8600000	41966.1	41968.4	2	3027.89
3511018	43	4.51	4.10547	0	10	0	0	0	0	0	0	0	0	0	0	1	0		0	0	4.125	Female	Private residence/accommodation	G05A	Saturday	N	0	0	1	1	1	2	G05	Costing 2014-2015	Dandenong	758003	8600000	41968.3	41972.4	4	8408.97
3499688	46	4.51	1.37109	0	10	0	0	0	0	0	0	0	0	1	0	1	0		0	0	1.375	Male	Private residence/accommodation	G66A	Sunday	N	0	0	1	1	1	2	G66	Costing 2014-2015	Dandenong	2400000	8600000	41951.2	41952.6	1	1257.97
3502045	51	4.51	3.40625	0	10	0	0	0	0	0	0	0	0	0	0	1	0		0	0	3.99344	Male	Private residence/accommodation	G48B	Saturday	N	0	0	1	0	1	2	G48	Costing 2014-2015	Dandenong	2300000	8600000	41955.1	41958.5	3	5095.17
3507939	75	4.51	8.22656	0	10	0	0	0	0	0	0	0	0	0	0	1	0		0	0	8.25	Male	Private residence/accommodation	G01A	Friday	Y	0	0	1	1	1	2	G01	Costing 2014-2015	Dandenong	7200000	8600000	41963.4	41971.7	8	21392.7
3518009	35	4.51	3.73438	1	10	0	0	0	0	0	0	0	0	0	0	1	0		0	0	3.70833	Female	Private residence/accommodation	X63A	Monday	N	0	0	1	1	1	2	X63	Costing 2014-2015	Dandenong	890709	8600000	41977.8	41981.5	4	3511.99
3510081	37	4.51	1.67188	0	10	0	0	0	0	0	0	0	0	0	0	1	0		0	0	1.70833	Male	Private residence/accommodation	J64B	Tuesday	N	0	0	1	0	1	2	J64	Costing 2014-2015	Dandenong	7700000	8600000	41966.7	41968.4	2	3806.01
3504161	31	4.51	9.94141	1	10	0	0	0	0	0	0	0	0	0	0	1	0		0	0	9.91667	Female	Private residence/accommodation	X63A	Monday	Y	0	0	1	1	1	2	X63	Costing 2014-2015	Dandenong	461153	8600000	41957.7	41967.6	10	8870.25
3506305	78	4.51	3	0	10	0	0	0	0	0	0	0	0	0	0	1	0		0	0	5.33714	Male	Other acute hosp/ext care/rehab/geri ctr	H64A	Friday	N	0	0	1	1	1	2	H64	Costing 2014-2015	Dandenong	2200000	8600000	41961.5	41964.5	3	3340.6
3513408	29	4.51	4.33984	1	10	0	0	0	0	0	0	0	0	0	0	1	0		0	0	1.21268	Female	Private residence/accommodation	G70B	Tuesday	N	0	0	1	0	1	2	G70	Costing 2014-2015	Dandenong	2300000	8600000	41971.2	41975.5	4	3860.29
3515790	73	4.51	2.92969	0	10	0	0	0	0	0	0	0	0	0	0	1	0		0	0	6.83375	Male	Private residence/accommodation	H60A	Thursday	Y	0	0	1	1	1	2	H60	Costing 2014-2015	Dandenong	2500000	8600000	41974.8	41977.7	3	10589.4
3514862	42	4.51	2.89844	1	10	0	0	0	0	0	0	0	0	0	0	1	0		0	0	1.67275	Male	Private residence/accommodation	G11Z	Wednesday	N	0	0	1	0	1	2	G11	Costing 2014-2015	Dandenong	2100000	8600000	41973.5	41976.4	3	7358.98
3497689	51	4.51	2.86328	0	10	0	0	0	0	0	0	0	0	0	0	1	0		0	0	3.7456	Female	Private residence/accommodation	G47B	Saturday	N	0	0	1	0	1	2	G47	Costing 2014-2015	Dandenong	2400000	8600000	41948.7	41951.6	3	3471.01
3503597	74	4.51	13.1758	1	10	0	0	0	0	0	0	0	0	0	0	1	0		0	0	13.1667	Female	Private residence/accommodation	G02A	Thursday	Y	0	0	1	1	1	2	G02	Costing 2014-2015	Dandenong	2000000	8600000	41957.3	41970.5	13	19432
3516239	50	4.51	1.05859	0	10	0	0	0	0	0	0	0	0	0	0	1	0		0	0	1.08333	Male	Private residence/accommodation	Q61B	Wednesday	N	0	0	1	0	1	2	Q61	Costing 2014-2015	Dandenong	2400000	8600000	41975.6	41976.6	1	1799.67
3499923	22	4.51	1.89453	1	10	0	0	0	0	0	0	0	0	0	0	1	0		0	0	1.875	Female	Private residence/accommodation	N07A	Monday	N	0	0	1	1	1	2	N07	Costing 2014-2015	Dandenong	2400000	8600000	41951.6	41953.5	2	5674.94
3503340	36	4.51	2.63281	0	10	0	0	0	0	0	0	0	0	0	0	1	0		0	0	5.82512	Female	Private residence/accommodation	G70A	Sunday	N	0	0	1	1	1	2	G70	Costing 2014-2015	Dandenong	4500000	8600000	41956.9	41959.5	3	3183.55
3500632	69	4.51	1.05859	0	10	0	0	0	0	0	0	0	0	0	0	1	0		0	0	2.34832	Male	Private residence/accommodation	G11Z	Tuesday	N	0	0	1	0	1	2	G11	Costing 2014-2015	Dandenong	7900000	8600000	41953.4	41954.4	1	3351.55
3495428	75	4.51	3.92188	1	10	0	0	0	0	0	0	0	0	1	0	1	0		0	0	3.2278	Female	Private residence/accommodation	G70A	Wednesday	N	0	0	1	1	1	2	G70	Costing 2014-2015	Dandenong	2300000	8600000	41944.5	41948.4	4	5296.1
3518401	48	4.51	2.81641	0	10	0	0	0	0	0	0	0	0	0	0	1	0		0	0	3.95573	Female	Private residence/accommodation	G70A	Monday	N	0	0	1	1	1	2	G70	Costing 2014-2015	Dandenong	2500000	8600000	41978.7	41981.5	3	3487.73
3495375	76	4.51	4.59375	0	10	0	0	0	0	0	0	0	0	1	0	1	0		0	0	7.12842	Female	Private residence/accommodation	G65A	Thursday	Y	0	0	1	1	1	2	G65	Costing 2014-2015	Dandenong	4600000	8600000	41944.9	41949.5	5	4785.69
3502308	30	4.51	4.16797	0	10	0	0	0	0	0	0	0	0	0	0	1	0		0	0	5.6073	Male	Private residence/accommodation	G46B	Sunday	N	0	0	1	0	1	2	G46	Costing 2014-2015	Dandenong	7900000	8600000	41955.6	41959.7	4	5203.01
3516711	70	4.51	6.28125	0	10	0	0	0	0	0	0	0	0	1	0	1	0		0	0	6.29167	Male	Private residence/accommodation	G02A	Tuesday	Y	0	0	1	1	1	2	G02	Costing 2014-2015	Dandenong	2100000	8600000	41976.3	41982.6	6	16930.5
3509779	59	4.51	12.3164	1	10	0	0	0	2	1	0	0	3	0	0	1	0		0	0	7.05161	Female	Private residence/accommodation	X63A	Friday	Y	1	0	1	1	1	2	X63	Costing 2014-2015	Dandenong	2300000	8600000	41966.2	41978.6	12	17237.7
3511788	85	4.51	5.34766	1	10	0	0	0	0	0	0	0	0	0	0	1	0		0	0	5.33333	Male	Private residence/accommodation	G02A	Monday	N	0	0	1	1	1	2	G02	Costing 2014-2015	Dandenong	2200000	8600000	41969.3	41974.7	5	16052.3
3512532	70	4.51	3.73438	0	10	0	0	0	0	0	0	0	0	1	0	1	0		0	0	5.13323	Male	Private residence/accommodation	Z61A	Sunday	N	0	0	1	1	1	2	Z61	Costing 2014-2015	Dandenong	2500000	8600000	41969.7	41973.5	4	3502.48
3500218	66	4.51	2.01563	1	10	0	0	0	0	0	0	0	0	0	0	1	0		0	0	2.00274	Female	Private residence/accommodation	G70B	Tuesday	N	0	0	1	0	1	2	G70	Costing 2014-2015	Dandenong	717901	8600000	41952.4	41954.5	2	2520.74
3499896	58	4.51	3.99219	0	10	0	0	0	0	0	0	0	0	0	0	1	0		0	0	4.78653	Female	Private residence/accommodation	G70A	Wednesday	Y	0	0	1	1	1	2	G70	Costing 2014-2015	Dandenong	4500000	8600000	41951.5	41955.5	4	5363.15
3514145	68	4.51	2.76172	1	10	0	0	0	0	0	0	0	0	0	0	1	0		0	0	2.17986	Female	Other acute hosp/ext care/rehab/geri ctr	G47B	Monday	N	0	0	1	0	1	2	G47	Costing 2014-2015	Dandenong	7100000	8600000	41971.8	41974.6	3	2911.36
3506807	66	4.51	22.5352	1	10	0	0	0	0	0	0	1	1	0	0	1	0		0	0	22.5	Male	Statistical Separation	G01A	Thursday	Y	1	0	1	1	1	2	G01	Costing 2014-2015	Dandenong	4700000	8600000	41962.1	41984.7	22	36473.2
3501664	56	4.51	11.0703	1	10	0	0	0	0	0	0	0	0	0	0	1	0		0	0	8.27539	Male	Private residence/accommodation	H62A	Saturday	N	0	0	1	1	1	2	H62	Costing 2014-2015	Dandenong	7900000	8600000	41954.6	41965.6	11	9893.66
3515108	41	4.51	1.125	0	10	0	0	0	0	0	0	0	0	0	0	1	0		0	0	1.125	Male	Private residence/accommodation	G11Z	Tuesday	N	0	0	1	0	1	2	G11	Costing 2014-2015	Dandenong	4600000	8600000	41974.3	41975.4	1	3225.26
3511729	53	4.51	1.71484	0	10	0	0	0	0	0	0	0	0	1	0	1	0		0	0	4.17105	Male	Private residence/accommodation	Z61A	Thursday	N	0	0	1	1	1	2	Z61	Costing 2014-2015	Dandenong	2200000	8600000	41969	41970.8	1	1538.78
3501982	85	4.51	7.32031	0	10	0	0	0	0	0	0	0	0	0	0	1	0		0	0	7.33333	Female	Other acute hosp/ext care/rehab/geri ctr	G02B	Wednesday	Y	0	0	1	0	1	2	G02	Costing 2014-2015	Dandenong	2000000	8600000	41955.3	41962.6	7	17480.4
3517495	64	4.51	5.32031	1	10	0	0	0	0	0	0	0	0	0	0	1	0		0	0	5.29167	Female	Private residence/accommodation	N12A	Tuesday	Y	0	0	1	1	1	2	N12	Costing 2014-2015	Dandenong	7200000	8600000	41977.3	41982.6	5	14246.9
3515706	81	4.51	2.73047	1	10	0	0	0	0	0	0	0	0	0	0	1	0		0	0	1.63849	Male	Private residence/accommodation	Q61B	Thursday	N	0	0	1	0	1	2	Q61	Costing 2014-2015	Dandenong	2400000	8600000	41974.7	41977.4	3	3182.38
3513512	53	4.51	1.08203	0	10	0	0	0	0	0	0	0	0	0	0	1	0		0	0	1.08333	Female	Private residence/accommodation	G70B	Saturday	N	0	0	1	0	1	2	G70	Costing 2014-2015	Dandenong	4200000	8600000	41971.3	41972.4	1	4191.93
3512980	83	4.51	5.98438	0	10	0	0	0	0	0	0	0	0	0	0	1	0		0	0	7.35568	Female	Other acute hosp/ext care/rehab/geri ctr	H64A	Wednesday	Y	0	0	1	1	1	2	H64	Costing 2014-2015	Dandenong	4100000	8600000	41970.6	41976.5	6	5886.35
3515091	87	4.51	14.3789	0	10	0	0	0	0	0	0	0	0	0	0	1	0		0	0	14.4167	Female	Other acute hosp/ext care/rehab/geri ctr	G01A	Monday	Y	0	0	1	1	1	2	G01	Costing 2014-2015	Dandenong	7300000	8600000	41974.3	41988.7	14	37696
3500321	43	4.51	1.83984	0	10	0	0	0	0	0	0	0	0	1	0	1	0		0	0	6.79	Male	Private residence/accommodation	B71A	Tuesday	N	0	0	1	1	1	2	B71	Costing 2014-2015	Dandenong	4400000	8600000	41952.8	41954.6	2	1816.79
3496418	77	4.51	5.94141	0	10	0	0	0	0	0	0	0	0	0	0	1	0		0	0	6.59367	Female	Private residence/accommodation	G10A	Sunday	N	0	0	1	1	1	2	G10	Costing 2014-2015	Dandenong	702345	8600000	41946.7	41952.6	6	11901.3
3505266	64	4.51	1.63672	0	10	0	0	0	0	0	0	0	0	0	0	1	0		0	0	2.59226	Male	Private residence/accommodation	G70B	Tuesday	N	0	0	1	0	1	2	G70	Costing 2014-2015	Dandenong	4500000	8600000	41960	41961.7	1	1888.75
3516402	40	4.51	1.64453	0	10	0	0	0	0	0	0	0	0	0	0	1	0		0	0	2.56961	Female	Private residence/accommodation	G67B	Thursday	N	0	0	1	0	1	2	G67	Costing 2014-2015	Dandenong	4600000	8600000	41975.9	41977.6	2	1461.17
3512250	71	4.51	1.73438	0	10	0	0	0	0	0	0	0	0	0	0	1	0		0	0	1.75	Male	Other acute hosp/ext care/rehab/geri ctr	H62B	Friday	N	0	0	1	0	1	2	H62	Costing 2014-2015	Dandenong	7900000	8600000	41969.7	41971.4	2	2420.81
3504926	24	4.51	5.03125	1	10	0	0	0	0	0	0	0	0	0	0	1	0		0	0	3.1647	Male	Private residence/accommodation	G67A	Thursday	Y	0	0	1	1	1	2	G67	Costing 2014-2015	Dandenong	4600000	8600000	41958.5	41963.6	5	4528.48
3499620	50	4.51	4.28906	1	10	0	0	0	0	0	0	0	0	0	0	1	0		0	0	1.75569	Female	Private residence/accommodation	G47B	Wednesday	N	0	0	1	0	1	2	G47	Costing 2014-2015	Dandenong	345214	8600000	41951.3	41955.6	4	4674.31
3499144	51	4.51	0.882813	1	10	0	0	0	0	0	0	0	0	0	0	1	0		0	0	0.875	Male	Private residence/accommodation	H63B	Saturday	N	0	0	1	0	1	2	H63	Costing 2014-2015	Dandenong	4700000	8600000	41950.5	41951.4	1	1543.47
3496405	63	4.51	5.12891	1	10	0	0	0	0	0	0	0	0	0	0	1	0		0	0	3.91134	Male	Private residence/accommodation	G65B	Saturday	N	0	0	1	0	1	2	G65	Costing 2014-2015	Dandenong	4700000	8600000	41946.6	41951.8	5	6595.4
3517714	54	4.51	13.168	1	10	0	0	0	0	0	0	0	0	0	0	1	0		0	0	8.43799	Male	Private residence/accommodation	G48A	Wednesday	N	0	0	1	1	1	2	G48	Costing 2014-2015	Dandenong	7800000	8600000	41977.4	41990.6	13	12895.1
3517935	23	4.51	0.996094	0	10	0	0	0	0	0	0	0	0	0	0	1	0		0	0	4.08773	Female	Private residence/accommodation	H43B	Friday	N	0	0	1	0	1	2	H43	Costing 2014-2015	Dandenong	4400000	8600000	41977.6	41978.6	1	957.754
3496406	54	4.51	0.945313	0	10	0	0	0	0	0	0	0	0	0	0	1	0		0	0	2.96172	Male	Private residence/accommodation	H62B	Tuesday	N	0	0	1	0	1	2	H62	Costing 2014-2015	Dandenong	2400000	8600000	41946.6	41947.5	1	814.268
3505267	61	4.51	3.51953	1	10	0	0	0	0	0	0	0	0	0	0	1	0		0	0	3.5	Male	Private residence/accommodation	G67A	Thursday	N	0	0	1	1	1	2	G67	Costing 2014-2015	Dandenong	2500000	8600000	41960.1	41963.6	3	3593.77
3510979	43	4.51	8.36328	1	10	0	0	0	0	0	0	0	0	1	0	1	0		0	0	3.02471	Male	Private residence/accommodation	G04C	Wednesday	Y	0	0	1	0	1	2	G04	Costing 2014-2015	Dandenong	431908	8600000	41968.2	41976.6	8	12318.7
3517450	25	4.51	1.79297	0	10	0	0	0	0	0	0	0	0	0	0	1	0		0	0	2.64639	Female	Private residence/accommodation	G07A	Friday	N	0	0	1	1	1	2	G07	Costing 2014-2015	Dandenong	4000000	8600000	41976.7	41978.5	2	5141.25
3507610	59	4.51	1.73828	0	10	0	0	0	0	0	0	0	0	0	0	1	0		0	0	1.75	Male	Private residence/accommodation	H63B	Friday	N	0	0	1	0	1	2	H63	Costing 2014-2015	Dandenong	2400000	8600000	41962.9	41964.6	2	1706.77
3499626	67	4.51	3.40625	1	10	0	0	0	0	0	0	0	0	0	0	1	0		0	0	1.64005	Female	Private residence/accommodation	G67B	Tuesday	N	0	0	1	0	1	2	G67	Costing 2014-2015	Dandenong	2400000	8600000	41951	41954.4	3	4891.61
3507011	71	4.51	4.19531	1	10	0	0	0	0	0	0	0	0	0	0	1	0		0	0	2.95659	Male	Private residence/accommodation	H62B	Sunday	N	0	0	1	0	1	2	H62	Costing 2014-2015	Dandenong	4500000	8600000	41962.4	41966.6	4	4054.81
3497043	57	4.51	13.8516	1	10	0	0	0	0	0	0	0	0	0	0	1	0		0	0	6.05212	Male	Private residence/accommodation	H63A	Tuesday	Y	0	0	1	1	1	2	H63	Costing 2014-2015	Dandenong	4300000	8600000	41947.8	41961.6	14	13632.8
3498619	37	4.51	0.9375	0	10	0	0	0	0	0	0	0	0	0	0	1	0		0	0	0.958333	Male	Private residence/accommodation	H08B	Friday	N	0	0	1	0	1	2	H08	Costing 2014-2015	Dandenong	4300000	8600000	41949.5	41950.4	1	4599.66
3498616	58	4.51	9.11719	1	10	0	0	0	0	0	0	0	0	0	0	1	0		8.03472	11570	1.09028	Female	Private residence/accommodation	G11Z	Saturday	N	0	0	1	0	1	2	G11	Costing 2014-2015	Dandenong	2200000	8600000	41949.5	41958.6	9	10784.1
3499298	40	4.51	11.0469	1	10	0	0	0	0	0	0	0	0	0	0	1	0		0	0	6.86277	Female	Private residence/accommodation	G47A	Tuesday	Y	0	0	1	1	1	2	G47	Costing 2014-2015	Dandenong	2400000	8600000	41950.6	41961.7	11	11251.4
3509895	27	4.51	0.277344	1	10	0	0	0	0	0	0	0	0	0	0	1	0		0	0	0.25	Female	Other acute hosp/ext care/rehab/geri ctr	I80Z	Sunday	N	0	0	1	0	1	2	I80	Costing 2014-2015	Dandenong	4700000	8600000	41966.6	41966.8	1	576.359
3509864	77	4.51	4.86328	1	10	0	0	0	0	0	0	0	0	0	0	1	0		0	0	4.33385	Male	Private residence/accommodation	H62B	Thursday	Y	0	0	1	0	1	2	H62	Costing 2014-2015	Dandenong	2100000	8600000	41965.8	41970.6	5	5012.68
3496764	53	4.51	1.48828	0	10	0	0	0	0	0	0	0	0	1	0	1	0		0	0	3.39894	Male	Private residence/accommodation	X63B	Wednesday	N	0	0	1	0	1	2	X63	Costing 2014-2015	Dandenong	2200000	8600000	41947.1	41948.6	1	1655.8
3496744	40	4.51	3.39844	1	10	0	0	0	0	0	0	0	0	0	0	1	0		0	0	2.23947	Female	Private residence/accommodation	G70B	Friday	Y	0	0	1	0	1	2	G70	Costing 2014-2015	Dandenong	4500000	8600000	41947	41950.4	4	3309.86
3502406	71	4.51	9	1	10	0	0	0	0	0	0	0	0	0	0	1	0		6.97708	10047	2.02292	Female	Private residence/accommodation	G48A	Friday	N	0	0	1	1	1	2	G48	Costing 2014-2015	Dandenong	891761	8600000	41955.6	41964.6	9	6407.38
3514653	45	4.51	5.68359	0	10	0	0	0	0	0	0	0	0	0	0	1	0		0	0	5.83225	Male	Private residence/accommodation	H62A	Friday	Y	0	0	1	1	1	2	H62	Costing 2014-2015	Dandenong	2300000	8600000	41973	41978.7	6	5765.83
3514153	45	4.51	3.59375	0	10	0	0	0	0	0	0	0	0	0	0	1	0		0	0	4.0966	Male	Private residence/accommodation	G48B	Tuesday	N	0	0	1	0	1	2	G48	Costing 2014-2015	Dandenong	4600000	8600000	41971.8	41975.4	4	3968
3512578	73	4.51	25.4063	1	10	0	0	0	0	0	0	0	0	0	0	1	0		0	0	25.375	Female	Other acute hosp/ext care/rehab/geri ctr	G01A	Monday	Y	0	0	1	1	1	2	G01	Costing 2014-2015	Dandenong	7800000	8600000	41970.3	41995.7	25	54213.9
3503343	62	4.51	0.796875	0	10	0	0	0	0	0	0	0	0	0	0	1	0		0	0	3.07224	Female	Private residence/accommodation	F65B	Friday	N	0	0	1	0	1	2	F65	Costing 2014-2015	Dandenong	2200000	8600000	41956.8	41957.6	1	756.125
3496057	75	4.51	1.59766	0	10	0	0	0	0	0	0	0	0	0	0	1	0		0	0	5.34965	Female	Private residence/accommodation	T62A	Tuesday	N	0	0	1	1	1	2	T62	Costing 2014-2015	Dandenong	2400000	8600000	41946	41947.6	1	1649.78
3516586	65	4.51	0.753906	0	10	0	0	0	0	0	0	0	0	0	0	1	0		0	0	5.73301	Female	Private residence/accommodation	G70A	Wednesday	N	0	0	1	1	1	2	G70	Costing 2014-2015	Dandenong	7200000	8600000	41975.7	41976.5	1	810.874
3496541	72	4.51	3.92188	1	10	0	0	1	0	0	0	0	1	0	0	1	0		0	0	2.00274	Male	Private residence/accommodation	G70B	Friday	N	1	0	1	0	1	2	G70	Costing 2014-2015	Dandenong	2400000	8600000	41946.9	41950.8	4	3543.51
3514046	44	4.51	3.875	1	10	0	0	0	0	0	0	0	0	0	0	1	0		0	0	3.57599	Female	Private residence/accommodation	H62B	Tuesday	N	0	0	1	0	1	2	H62	Costing 2014-2015	Dandenong	4700000	8600000	41971.7	41975.5	4	3579.61
3504095	44	4.51	12.7578	1	10	0	0	0	0	0	0	0	0	0	0	1	0		0	0	7.40402	Female	Private residence/accommodation	G48A	Thursday	Y	0	0	1	1	1	2	G48	Costing 2014-2015	Dandenong	7000000	8600000	41957.7	41970.4	13	11468.1
3508533	48	4.51	16.7695	1	10	0	0	0	0	0	1	1	2	0	0	1	0		0	0	16.75	Female	Other acute hosp/ext care/rehab/geri ctr	G02A	Sunday	Y	1	0	1	1	1	2	G02	Costing 2014-2015	Dandenong	269059	8600000	41963.9	41980.7	17	28307.1
3516597	53	4.51	13.8984	1	10	0	0	0	0	0	0	0	0	0	0	1	0		0	0	13.875	Male	Private residence/accommodation	G01A	Tuesday	Y	0	0	1	1	1	2	G01	Costing 2014-2015	Dandenong	7700000	8600000	41975.8	41989.6	14	25091.5
3506040	87	4.51	10.6641	0	10	0	0	0	0	0	0	0	0	0	0	1	0		0	0	10.6667	Male	Private residence/accommodation	G48B	Friday	N	0	0	1	0	1	2	G48	Costing 2014-2015	Dandenong	7900000	8600000	41960.9	41971.6	11	10621.4
3512435	38	4.51	5.83594	1	10	0	0	0	0	0	0	0	0	0	0	1	0		0	0	5.83333	Male	Other acute hosp/ext care/rehab/geri ctr	H64A	Tuesday	N	0	0	1	1	1	2	H64	Costing 2014-2015	Dandenong	7900000	8600000	41969.5	41975.3	6	5113.04
3517541	53	4.51	5.47656	1	10	0	0	0	0	0	0	0	0	0	0	1	0		0	0	2.05307	Female	Private residence/accommodation	G47B	Tuesday	N	0	0	1	0	1	2	G47	Costing 2014-2015	Dandenong	2300000	8600000	41977.1	41982.6	5	6007.23
3504850	74	4.51	3.23047	0	10	0	0	0	0	0	0	0	0	0	0	1	0		0	0	7.7424	Male	Other acute hosp/ext care/rehab/geri ctr	Q61A	Wednesday	N	0	0	1	1	1	2	Q61	Costing 2014-2015	Dandenong	7400000	8600000	41959.1	41962.3	3	5396.73
3519058	74	4.51	5.74609	1	10	0	0	0	0	0	0	0	0	0	0	1	0		0	0	5.18934	Female	Private residence/accommodation	G70A	Thursday	N	0	0	1	1	1	2	G70	Costing 2014-2015	Dandenong	3222	8600000	41978.9	41984.6	6	7656.54
3507355	20	4.51	0.949219	0	10	0	0	0	0	0	0	0	0	0	0	1	0		0	0	2.21439	Female	Left against Medical Advice	N08Z	Thursday	N	0	0	1	0	1	2	N08	Costing 2014-2015	Dandenong	7900000	8600000	41962.7	41963.7	1	8432.38
3507949	63	4.51	1.41406	0	10	0	0	0	0	0	0	0	0	0	0	1	0		0	0	1.41667	Male	Private residence/accommodation	Z61A	Friday	N	0	0	1	1	1	2	Z61	Costing 2014-2015	Dandenong	2300000	8600000	41963.5	41964.9	1	2585.67
3514607	87	4.51	3.12109	0	10	0	0	0	0	0	0	0	0	0	0	1	0		0	0	3.125	Female	Private residence/accommodation	H62B	Tuesday	N	0	0	1	0	1	2	H62	Costing 2014-2015	Dandenong	2400000	8600000	41972.6	41975.8	3	2673.34
3501153	27	4.51	0.773438	0	10	0	0	0	0	0	0	0	0	0	0	1	0		0	0	1.18732	Female	Private residence/accommodation	I75B	Tuesday	N	0	0	1	0	1	2	I75	Costing 2014-2015	Dandenong	2500000	8600000	41953.7	41954.5	1	1451.21
3516401	44	4.51	1.63281	1	10	0	0	0	0	0	0	0	0	0	0	1	0		0	0	1.625	Female	Private residence/accommodation	G66A	Thursday	N	0	0	1	1	1	2	G66	Costing 2014-2015	Dandenong	2300000	8600000	41975.9	41977.5	2	2044.01
3499629	54	4.51	3.53906	0	10	0	0	0	0	0	0	0	0	1	0	1	0		0	0	4.35091	Female	Private residence/accommodation	E71B	Tuesday	N	0	0	1	0	1	2	E71	Costing 2014-2015	Dandenong	4300000	8600000	41951	41954.6	3	3199.15
3513678	62	4.51	1.10547	1	10	0	0	0	0	0	0	0	0	0	0	1	0		0	0	1.08333	Female	Private residence/accommodation	H62B	Saturday	N	0	0	1	0	1	2	H62	Costing 2014-2015	Dandenong	4600000	8600000	41971.4	41972.5	1	1001.76
3511267	74	4.51	1.13672	0	10	0	0	0	0	0	0	0	0	0	0	1	0		0	0	1.16667	Female	Private residence/accommodation	Q61A	Wednesday	N	0	0	1	1	1	2	Q61	Costing 2014-2015	Dandenong	2100000	8600000	41968.6	41969.7	1	2238.97
3498698	94	4.51	13.8516	1	10	0	0	0	0	0	0	0	0	0	0	1	0		0	0	10.4692	Male	Other acute hosp/ext care/rehab/geri ctr	H62A	Thursday	Y	0	0	1	1	1	2	H62	Costing 2014-2015	Dandenong	2400000	8600000	41949.7	41963.6	14	14060.8
3505168	33	4.51	3.12109	0	10	0	0	0	0	0	0	0	0	1	0	1	0		0	0	3.72238	Male	Private residence/accommodation	G70A	Wednesday	Y	0	0	1	1	1	2	G70	Costing 2014-2015	Dandenong	7900000	8600000	41959.5	41962.7	3	3705.84
3508341	75	4.51	7.72656	1	10	0	0	0	0	0	0	0	0	0	0	1	0		0	0	3.85623	Female	Private residence/accommodation	G46B	Friday	Y	0	0	1	0	1	2	G46	Costing 2014-2015	Dandenong	4200000	8600000	41964	41971.7	8	12622.1
3501676	44	4.51	2.90625	0	10	0	0	0	0	0	0	0	0	0	0	1	0		0	0	2.91667	Male	Private residence/accommodation	F74A	Friday	Y	0	0	1	1	1	2	F74	Costing 2014-2015	Dandenong	7200000	8600000	41954.6	41957.5	3	3642.04
3502201	49	4.51	1.12109	0	10	0	0	0	0	0	0	0	0	0	0	1	0		0	0	1.125	Male	Private residence/accommodation	F20Z	Thursday	N	0	0	1	0	1	2	F20	Costing 2014-2015	Dandenong	7800000	8600000	41955.4	41956.5	1	6019.38
3514183	65	4.51	3.67969	0	10	0	0	0	0	0	0	0	0	0	0	1	0		0	0	5.18934	Female	Private residence/accommodation	G70A	Tuesday	N	0	0	1	1	1	2	G70	Costing 2014-2015	Dandenong	7500000	8600000	41972.1	41975.7	3	3300.44
3510137	66	4.51	0.660156	0	10	1	0	0	0	0	0	0	0	0	0	1	0		0	0	0.666667	Male	Death	H63C	Monday	N	0	0	1	0	1	2	H63	Costing 2014-2015	Dandenong	4300000	8600000	41967	41967.7	1	6496.17
3511617	42	4.51	2.70313	0	10	0	0	0	0	0	0	0	0	0	0	1	0		0	0	6.61414	Male	Private residence/accommodation	H63A	Friday	Y	0	0	1	1	1	2	H63	Costing 2014-2015	Dandenong	2100000	8600000	41968.9	41971.6	3	4315.43
3513032	30	4.51	0.761719	0	10	0	0	0	0	0	0	0	0	0	0	1	0		0	0	0.791667	Male	Private residence/accommodation	G66A	Friday	N	0	0	1	1	1	2	G66	Costing 2014-2015	Dandenong	876809	8600000	41970.7	41971.5	1	1276.76
3507619	75	4.51	5.24609	1	10	0	0	0	0	0	0	0	0	0	0	1	0		0	0	5.20833	Female	Private residence/accommodation	G02A	Tuesday	Y	0	0	1	1	1	2	G02	Costing 2014-2015	Dandenong	4400000	8600000	41963.3	41968.5	5	11939.4
3497690	26	4.51	2.76172	1	10	0	0	0	0	0	0	0	0	0	0	1	0		0	0	2.22766	Female	Private residence/accommodation	G70A	Saturday	N	0	0	1	1	1	2	G70	Costing 2014-2015	Dandenong	7100000	8600000	41948.7	41951.5	3	2257.05
3502704	67	4.51	1.0625	0	10	0	0	0	0	0	0	0	0	0	0	1	0		0	0	1.08333	Male	Private residence/accommodation	G10B	Thursday	N	0	0	1	0	1	2	G10	Costing 2014-2015	Dandenong	7100000	8600000	41955.4	41956.5	1	4304.4
3517461	86	4.51	5.82422	0	10	0	0	0	0	0	0	0	0	0	0	1	0		0	0	13.4136	Male	Other acute hosp/ext care/rehab/geri ctr	G46A	Tuesday	Y	0	0	1	1	1	2	G46	Costing 2014-2015	Dandenong	4100000	8600000	41976.9	41982.7	6	6035.01
3511863	28	4.51	1.05859	0	10	0	0	0	0	0	0	0	0	0	0	1	0		0	0	1.08333	Male	Private residence/accommodation	G46B	Thursday	N	0	0	1	0	1	2	G46	Costing 2014-2015	Dandenong	7800000	8600000	41969.4	41970.4	1	2181.34
3510221	65	4.51	1.30469	1	10	0	0	0	0	0	0	0	0	0	0	1	0		0	0	1.29167	Female	Private residence/accommodation	G04C	Tuesday	N	0	0	1	0	1	2	G04	Costing 2014-2015	Dandenong	429185	8600000	41967.3	41968.6	1	5511.11
3505079	71	4.51	9.875	1	10	0	0	0	0	0	0	0	0	0	0	1	0		0	0	7.41913	Male	Private residence/accommodation	G48A	Wednesday	N	0	0	1	1	1	2	G48	Costing 2014-2015	Dandenong	2100000	8600000	41959.8	41969.7	10	9446.56
3518015	75	4.51	17.7422	0	10	0	0	0	0	0	0	0	0	0	0	1	0		0	0	17.75	Female	Other acute hosp/ext care/rehab/geri ctr	X63A	Monday	Y	0	0	1	1	1	2	X63	Costing 2014-2015	Dandenong	4100000	8600000	41977.8	41995.5	18	17071.2
3501224	62	4.51	0.433594	1	10	0	0	0	0	0	0	0	0	0	0	1	0		0	0	0.416667	Female	Private residence/accommodation	G48C	Tuesday	N	0	0	1	0	1	2	G48	Costing 2014-2015	Dandenong	4600000	8600000	41954.3	41954.7	1	3020.88
3510980	86	4.51	27.5	1	10	0	0	1	0	0	0	1	2	0	0	1	0		0	0	26.1123	Male	Statistical Separation	T01A	Monday	Y	1	0	1	1	1	2	T01	Costing 2014-2015	Dandenong	2400000	8600000	41968.2	41995.7	27	45178.3
3496944	82	4.51	8.06641	1	10	0	0	0	0	0	0	0	0	0	0	1	0		0	0	8.04167	Female	Private residence/accommodation	G65A	Wednesday	N	0	0	1	1	1	2	G65	Costing 2014-2015	Dandenong	2000000	8600000	41947.6	41955.7	8	9726.25
3518263	70	4.51	5.67578	1	10	0	0	0	0	0	0	0	0	0	0	1	0		0	0	3.82267	Female	Private residence/accommodation	X63B	Wednesday	Y	0	0	1	0	1	2	X63	Costing 2014-2015	Dandenong	2100000	8600000	41977.9	41983.6	6	5671.34
3502007	53	4.51	1.35938	0	10	0	0	0	0	0	0	0	0	0	0	1	0		0	0	2.05307	Male	Private residence/accommodation	G47B	Thursday	N	0	0	1	0	1	2	G47	Costing 2014-2015	Dandenong	408340	8600000	41955	41956.4	1	3120.3
3518544	64	4.51	6.9375	1	10	0	0	0	0	0	0	0	0	0	0	1	0		0	0	6.91667	Female	Private residence/accommodation	G01B	Friday	Y	0	0	1	0	1	2	G01	Costing 2014-2015	Dandenong	2100000	8600000	41978.4	41985.4	7	16237.6
3498758	45	4.51	7.44922	1	10	0	0	0	0	0	0	0	0	0	0	1	0		0	0	3.75923	Female	Private residence/accommodation	G64A	Friday	Y	0	0	1	1	1	2	G64	Costing 2014-2015	Dandenong	2100000	8600000	41950	41957.5	7	6724.52
3497307	87	4.51	13.2734	1	10	0	0	0	0	0	0	0	0	0	0	1	0		0	0	12.9265	Female	Private residence/accommodation	G02A	Tuesday	Y	0	0	1	1	1	2	G02	Costing 2014-2015	Dandenong	872870	8600000	41948.3	41961.6	13	20298.6
3516682	48	4.51	1.75781	0	10	0	0	0	0	0	0	0	0	0	0	1	0		0	0	2.23947	Male	Private residence/accommodation	G70B	Thursday	Y	0	0	1	0	1	2	G70	Costing 2014-2015	Dandenong	4100000	8600000	41976	41977.7	2	1648.81
3507324	34	4.51	3.99219	0	10	0	0	0	0	0	0	0	0	0	0	1	0		0	0	4	Female	Private residence/accommodation	G70B	Sunday	N	0	0	1	0	1	2	G70	Costing 2014-2015	Dandenong	4500000	8600000	41962.6	41966.6	4	3421.12
3502926	69	4.51	14.3984	1	10	0	0	0	0	0	0	0	0	0	0	1	0		0	0	14.375	Female	Statistical Separation	G01A	Thursday	Y	0	0	1	1	1	2	G01	Costing 2014-2015	Dandenong	2200000	8600000	41956.3	41970.7	14	28094.4
3495296	88	4.51	2.48047	0	10	0	0	0	0	0	0	0	0	0	0	1	0		0	0	7.07561	Female	Aged care residential facility	G65A	Monday	N	0	0	1	1	1	2	G65	Costing 2014-2015	Dandenong	2100000	8600000	41944.2	41946.7	2	1982.59
3515930	67	4.51	6.21094	1	10	0	0	0	0	0	0	0	0	0	0	1	0		0	0	6.20833	Female	Private residence/accommodation	G02B	Monday	Y	0	0	1	0	1	2	G02	Costing 2014-2015	Dandenong	4600000	8600000	41975.3	41981.5	6	8622.89
3507919	93	4.51	2.14453	0	10	0	0	0	0	0	0	0	0	0	0	1	0		0	0	4.70994	Female	Private residence/accommodation	G47B	Saturday	N	0	0	1	0	1	2	G47	Costing 2014-2015	Dandenong	2200000	8600000	41963.4	41965.6	2	2539.05
3497902	85	4.51	11.2578	1	10	0	0	1	0	0	0	0	1	0	0	1	0		0	0	11.25	Male	Left against Medical Advice	G60A	Sunday	Y	1	0	1	1	1	2	G60	Costing 2014-2015	Dandenong	4600000	8600000	41948.7	41959.9	11	10495.5
3508116	57	4.51	24.3008	1	10	0	0	0	1	0	0	1	2	0	0	1	0		0	0	24.0174	Female	Statistical Separation	G02A	Sunday	Y	1	0	1	1	1	2	G02	Costing 2014-2015	Dandenong	2100000	8600000	41963.6	41987.9	24	38118.2
3500264	90	4.51	13.8789	0	10	0	0	0	0	0	0	1	1	0	0	1	0		0	0	13.9167	Male	Other acute hosp/ext care/rehab/geri ctr	G02A	Sunday	Y	1	0	1	1	1	2	G02	Costing 2014-2015	Dandenong	331194	8600000	41952.6	41966.5	14	24784
3503357	80	4.51	1.88672	0	10	0	0	0	0	0	0	0	0	0	0	1	0		0	0	1.91667	Female	Private residence/accommodation	Q62A	Saturday	N	0	0	1	1	1	2	Q62	Costing 2014-2015	Dandenong	4100000	8600000	41956.8	41958.7	2	1829.79
3504365	88	4.51	11.0469	0	10	0	0	0	0	0	0	0	0	0	0	1	0		0	0	11.0833	Male	Private residence/accommodation	H63B	Tuesday	N	0	0	1	0	1	2	H63	Costing 2014-2015	Dandenong	7900000	8600000	41957.6	41968.6	11	10059.8
3501003	60	4.51	6.74219	0	10	0	0	0	0	0	0	0	0	0	0	1	0		0	0	8.38859	Male	Private residence/accommodation	T60A	Monday	Y	0	0	1	1	1	2	T60	Costing 2014-2015	Dandenong	441307	8600000	41953.9	41960.6	7	12957.9
3495381	59	4.51	0.164063	0	10	0	0	0	0	0	0	0	0	0	0	1	0		0	0	0.166667	Female	Private residence/accommodation	X06B	Saturday	N	0	0	1	0	1	2	X06	Costing 2014-2015	Dandenong	7900000	8600000	41944.4	41944.6	1	867.375
3511297	56	4.51	10.7695	1	10	0	0	0	0	0	0	0	0	1	0	1	0		0	0	6.05212	Male	Private residence/accommodation	H63A	Saturday	Y	0	0	1	1	1	2	H63	Costing 2014-2015	Dandenong	4600000	8600000	41968.7	41979.4	11	10810.2
3502161	23	4.51	5.07031	1	10	0	0	0	0	0	0	0	0	0	0	1	0		0	0	2.06439	Male	Private residence/accommodation	T61B	Monday	N	0	0	1	0	1	2	T61	Costing 2014-2015	Dandenong	419766	8600000	41955.3	41960.4	5	8708.83
3506488	90	4.51	3.99609	0	10	0	0	0	0	0	0	0	0	0	0	1	0		0	0	6.21085	Female	Aged care residential facility	G61A	Saturday	Y	0	0	1	1	1	2	G61	Costing 2014-2015	Dandenong	7900000	8600000	41961.6	41965.6	4	4098.29
3497700	23	4.51	25.7305	1	10	0	0	0	0	0	0	0	0	0	0	1	0		0	0	12.98	Male	Private residence/accommodation	G02A	Monday	Y	0	0	1	1	1	2	G02	Costing 2014-2015	Dandenong	723205	8600000	41948.8	41974.5	26	35602.7
3500445	82	4.51	5.53125	1	10	0	0	0	0	0	0	0	0	0	0	1	0		0	0	3.14466	Male	Private residence/accommodation	H64B	Saturday	N	0	0	1	0	1	2	H64	Costing 2014-2015	Dandenong	2100000	8600000	41953.1	41958.6	5	4997.79
3495374	17	4.51	1.28906	0	10	0	0	0	1	0	0	0	1	0	0	1	0		0	0	2.28305	Female	Private residence/accommodation	G47B	Monday	N	1	0	1	0	1	2	G47	Costing 2014-2015	Dandenong	885514	8600000	41945.3	41946.6	1	1987.01
3499627	44	4.51	2.55078	1	10	0	0	0	1	0	0	0	1	0	0	1	0		0	0	1.67275	Male	Private residence/accommodation	G11Z	Monday	N	1	0	1	0	1	2	G11	Costing 2014-2015	Dandenong	7100000	8600000	41951	41953.5	3	5460.67
3501155	42	4.51	0.695313	0	10	0	0	0	0	0	0	0	0	0	0	1	0		0	0	1.80228	Male	Private residence/accommodation	G70B	Tuesday	N	0	0	1	0	1	2	G70	Costing 2014-2015	Dandenong	4400000	8600000	41953.7	41954.4	1	1866.33
3508927	34	4.51	2.05469	1	10	0	0	0	0	0	0	0	0	0	0	1	0		0	0	2.04167	Male	Private residence/accommodation	G11Z	Sunday	N	0	0	1	0	1	2	G11	Costing 2014-2015	Dandenong	4600000	8600000	41964.5	41966.6	2	4051.5
3505070	72	4.51	17.5664	0	10	0	0	0	1	0	0	0	1	0	0	1	0		0	0	20.6834	Female	Other acute hosp/ext care/rehab/geri ctr	G01A	Thursday	Y	1	0	1	1	1	2	G01	Costing 2014-2015	Dandenong	2300000	8600000	41959.9	41977.4	18	35526.8
3498061	42	4.51	4.45313	1	10	0	0	0	0	0	0	0	0	0	0	1	0		0	0	2.23947	Female	Private residence/accommodation	G70B	Monday	N	0	0	1	0	1	2	G70	Costing 2014-2015	Dandenong	7000000	8600000	41949	41953.4	5	5665.37
3510144	44	4.51	0.425781	1	10	0	0	0	0	0	0	0	0	1	0	1	0		0	0	0.199821	Male	Private residence/accommodation	G67B	Monday	N	0	0	1	0	1	2	G67	Costing 2014-2015	Dandenong	2400000	8600000	41967.2	41967.6	1	380.216
3505076	59	4.51	31.8711	1	10	0	0	0	0	0	0	0	0	0	0	1	0		0	0	12.3339	Female	Private residence/accommodation	G04A	Thursday	Y	0	0	1	1	1	2	G04	Costing 2014-2015	Dandenong	7900000	8600000	41959.8	41991.6	32	48658.3
3518660	71	4.51	4.10156	1	10	0	0	0	0	0	0	0	0	0	0	1	0		0	0	4.08333	Male	Private residence/accommodation	G48B	Tuesday	N	0	0	1	0	1	2	G48	Costing 2014-2015	Dandenong	4300000	8600000	41978.5	41982.6	4	4402.2
3501202	77	4.51	3.32031	0	10	0	0	0	2	0	0	0	2	1	0	1	0		0	0	3.33333	Male	Private residence/accommodation	G11Z	Friday	Y	1	0	1	0	1	2	G11	Costing 2014-2015	Dandenong	2300000	8600000	41954.3	41957.6	3	5869.32
3500955	77	4.51	4.77344	0	10	0	0	0	0	0	0	0	0	0	0	1	0		0	0	13.3898	Female	Private residence/accommodation	K40A	Saturday	Y	0	0	1	1	1	2	K40	Costing 2014-2015	Dandenong	887742	8600000	41953.8	41958.6	5	6573.45
3498090	92	4.51	0.359375	0	10	1	0	0	0	0	0	0	1	0	0	1	0		0	0	0.375	Male	Death	E62C	Thursday	N	1	0	1	0	1	2	E62	Costing 2014-2015	Dandenong	2300000	8600000	41949.2	41949.6	1	500.293
3524381	63	4.91	3.68359	1	11	0	0	0	0	0	0	0	0	1	0	1	0		0	0	3.66667	Male	Private residence/accommodation	G65B	Wednesday	Y	0	0	1	0	1	2	G65	Costing 2014-2015	Dandenong	2100000	8600000	41986.8	41990.4	4	4753.57
3529227	68	4.91	3.57422	0	11	0	0	0	0	0	0	0	0	0	0	1	0		0	0	6.47236	Male	Private residence/accommodation	E75A	Wednesday	N	0	0	1	1	1	2	E75	Costing 2014-2015	Dandenong	268466	8600000	41994	41997.6	3	3107.01
3533486	50	4.91	0.25	0	11	0	0	0	0	0	0	0	0	1	0	1	0		0	0	0.25	Male	Private residence/accommodation	I81Z	Sunday	N	0	0	1	0	1	2	I81	Costing 2014-2015	Dandenong	1000000	8600000	42001.4	42001.7	1	301.583
3522274	47	4.91	1.78125	0	11	0	0	0	0	0	0	0	0	0	0	1	0		0	0	5.04531	Male	Private residence/accommodation	X63A	Friday	Y	0	0	1	1	1	2	X63	Costing 2014-2015	Dandenong	7800000	8600000	41983.8	41985.6	2	2245.95
3519329	43	4.91	1.28125	0	11	0	0	0	0	0	0	0	0	0	0	1	0		0	0	4.0966	Female	Private residence/accommodation	G48B	Sunday	N	0	0	1	0	1	2	G48	Costing 2014-2015	Dandenong	2200000	8600000	41979.5	41980.8	1	2816.69
3528655	55	4.91	4.07813	0	11	0	0	0	0	0	0	0	0	0	0	1	0		0	0	4.60578	Male	Private residence/accommodation	K60B	Tuesday	Y	0	0	1	0	1	2	K60	Costing 2014-2015	Dandenong	363115	8600000	41992.6	41996.7	4	4983.08
3529837	69	4.91	10.0391	0	11	0	0	0	0	0	0	0	0	0	0	1	0		0	0	10.0417	Female	Private residence/accommodation	G01B	Thursday	N	0	0	1	0	1	2	G01	Costing 2014-2015	Dandenong	7700000	8600000	41995.3	42005.3	10	18046.4
3535414	24	4.91	1.0625	1	11	0	0	0	0	0	0	0	0	0	0	1	0		0	0	1.04167	Female	Private residence/accommodation	G11Z	Thursday	N	0	0	1	0	1	2	G11	Costing 2014-2015	Dandenong	7900000	8600000	42004.4	42005.5	1	1897.54
3527513	54	4.91	4.96875	1	11	0	0	0	0	0	0	0	0	0	0	1	0		0	0	4.95833	Female	Private residence/accommodation	H43B	Tuesday	N	0	0	1	0	1	2	H43	Costing 2014-2015	Dandenong	7900000	8600000	41991.5	41996.5	5	5013.89
3524366	55	4.91	4.65625	1	11	0	0	0	0	0	0	0	0	0	0	1	0		0	0	4.625	Female	Private residence/accommodation	H64A	Thursday	N	0	0	1	1	1	2	H64	Costing 2014-2015	Dandenong	4100000	8600000	41986.8	41991.4	5	4915.26
3535875	43	4.91	0.4375	1	11	0	0	0	0	0	0	0	0	1	0	1	0		0	0	0.243475	Male	Private residence/accommodation	X63B	Thursday	N	0	0	1	0	1	2	X63	Costing 2014-2015	Dandenong	4400000	8600000	42005	42005.4	1	559.779
3525637	78	4.91	2.51953	0	11	0	0	0	0	0	0	0	0	0	0	1	0		0	0	6.71387	Female	Private residence/accommodation	F75A	Thursday	N	0	0	1	1	1	2	F75	Costing 2014-2015	Dandenong	2100000	8600000	41988.9	41991.5	3	3695.41
3533993	58	4.91	4.00391	1	11	0	0	0	0	0	0	0	0	0	0	1	0		0	0	2.93456	Female	Private residence/accommodation	H62B	Friday	N	0	0	1	0	1	2	H62	Costing 2014-2015	Dandenong	2500000	8600000	42002.4	42006.4	4	3323.1
3523631	54	4.91	3.01563	1	11	0	0	0	0	0	0	0	0	0	0	1	0		0	0	3	Female	Private residence/accommodation	G07B	Monday	N	0	0	1	0	1	2	G07	Costing 2014-2015	Dandenong	4200000	8600000	41985.6	41988.6	3	5134.21
3521472	77	4.91	9.53516	1	11	0	0	0	0	0	0	0	0	0	0	1	0		0	0	5.18934	Female	Private residence/accommodation	G70A	Friday	Y	0	0	1	1	1	2	G70	Costing 2014-2015	Dandenong	4500000	8600000	41983	41992.5	10	9439.85
3530159	53	4.91	3.10547	0	11	0	0	0	0	0	0	0	0	0	0	1	0		0	0	7.34712	Male	Private residence/accommodation	H60A	Thursday	N	0	0	1	1	1	2	H60	Costing 2014-2015	Dandenong	4400000	8600000	41995.5	41998.6	3	3470.6
3530575	60	4.91	3.30078	0	11	0	0	0	0	0	0	0	0	0	0	1	0		0	0	3.33333	Male	Private residence/accommodation	G01B	Friday	Y	0	0	1	0	1	2	G01	Costing 2014-2015	Dandenong	7900000	8600000	41996.3	41999.6	3	14817.6
3521384	59	4.91	1.04297	1	11	0	0	0	0	0	0	0	0	0	0	1	0		0	0	1.04167	Male	Private residence/accommodation	G48B	Wednesday	N	0	0	1	0	1	2	G48	Costing 2014-2015	Dandenong	4200000	8600000	41982.6	41983.6	1	1922.53
3534960	78	4.91	2.83203	0	11	0	0	0	0	0	0	0	0	0	0	1	0		0	0	3.63518	Male	Private residence/accommodation	G70A	Friday	Y	0	0	1	1	1	2	G70	Costing 2014-2015	Dandenong	335339	8600000	42003.6	42006.5	3	4147.57
3534445	63	4.91	4.24219	0	11	0	0	0	0	0	0	0	0	0	0	1	0		0	0	4.25	Female	Private residence/accommodation	G66A	Friday	N	0	0	1	1	1	2	G66	Costing 2014-2015	Dandenong	775312	8600000	42002.5	42006.8	4	4248.97
3519828	89	4.91	9.875	0	11	0	0	0	1	0	0	0	1	0	0	1	0		0	0	9.875	Female	Aged care residential facility	G48A	Wednesday	N	1	0	1	1	1	2	G48	Costing 2014-2015	Dandenong	465061	8600000	41980.7	41990.6	10	9885.03
3520095	87	4.91	1.26953	0	11	0	0	0	0	0	0	0	0	0	0	1	0		0	0	2.42157	Female	Aged care residential facility	G65B	Tuesday	N	0	0	1	0	1	2	G65	Costing 2014-2015	Dandenong	455950	8600000	41981.4	41982.6	1	1015.83
3535470	39	4.91	2.13281	0	11	0	0	0	0	0	0	0	0	1	0	1	0		0	0	2.16667	Male	Left against Medical Advice	G66A	Friday	N	0	0	1	1	1	2	G66	Costing 2014-2015	Dandenong	7200000	8600000	42004.6	42006.8	2	1866.77
3522002	57	4.91	1.88672	1	11	0	0	0	0	0	0	0	0	0	0	1	0		0	0	1.875	Female	Private residence/accommodation	H62B	Friday	N	0	0	1	0	1	2	H62	Costing 2014-2015	Dandenong	7300000	8600000	41983.7	41985.6	2	1869.3
3534520	33	4.91	0.339844	0	11	0	0	0	0	0	0	0	0	0	0	1	0		0	0	0.375	Male	Private residence/accommodation	G70C	Tuesday	N	0	0	1	0	1	2	G70	Costing 2014-2015	Dandenong	7900000	8600000	42003.1	42003.5	1	541.836
3526395	89	4.91	14.5273	0	11	0	0	0	0	0	0	1	1	0	0	1	0		0	0	15.9051	Male	Other acute hosp/ext care/rehab/geri ctr	G02A	Wednesday	Y	1	0	1	1	1	2	G02	Costing 2014-2015	Dandenong	4200000	8600000	41989.9	42004.4	15	34435.1
3521689	82	4.91	12.3047	1	11	0	0	0	0	0	0	0	0	0	0	1	0		0	0	12.2917	Male	Other acute hosp/ext care/rehab/geri ctr	G01A	Monday	Y	0	0	1	1	1	2	G01	Costing 2014-2015	Dandenong	325962	8600000	41983.4	41995.7	12	22588.1
3522011	37	4.91	0.988281	0	11	0	0	0	0	0	0	0	0	0	0	1	0		0	0	1	Female	Private residence/accommodation	G61B	Thursday	N	0	0	1	0	1	2	G61	Costing 2014-2015	Dandenong	7900000	8600000	41983.7	41984.7	1	953.735
3521447	66	4.91	13.1289	1	11	0	0	0	0	0	0	0	0	0	0	1	0		0	0	13.125	Male	Private residence/accommodation	G01B	Tuesday	Y	0	0	1	0	1	2	G01	Costing 2014-2015	Dandenong	4500000	8600000	41983.3	41996.4	13	22688.2
3522922	82	4.91	7.49219	0	11	0	0	0	2	0	0	1	3	0	0	1	0		0	0	7.5	Male	Private residence/accommodation	G48A	Friday	Y	1	0	1	1	1	2	G48	Costing 2014-2015	Dandenong	4500000	8600000	41984.9	41992.4	8	19771
3524728	82	4.91	14.1875	0	11	0	0	0	0	0	0	0	0	0	0	1	0		0	0	14.2083	Male	Other acute hosp/ext care/rehab/geri ctr	G01A	Monday	Y	0	0	1	1	1	2	G01	Costing 2014-2015	Dandenong	7400000	8600000	41988.3	42002.5	14	28517.7
3522385	73	4.91	7.43359	0	11	0	0	0	0	0	0	0	0	0	0	1	0		0	0	7.45833	Male	Private residence/accommodation	G02A	Thursday	Y	0	0	1	1	1	2	G02	Costing 2014-2015	Dandenong	4300000	8600000	41984.3	41991.7	7	13171.9
3520251	62	4.91	7.98438	0	11	0	0	0	0	0	0	0	0	0	0	1	0		0	0	8.43799	Female	Private residence/accommodation	G48A	Tuesday	Y	0	0	1	1	1	2	G48	Costing 2014-2015	Dandenong	7900000	8600000	41981.5	41989.5	8	9558.49
3532787	72	4.91	4.00391	1	11	0	0	0	0	0	0	0	0	0	0	1	0		0	0	3.91694	Female	Private residence/accommodation	G65A	Tuesday	N	0	0	1	1	1	2	G65	Costing 2014-2015	Dandenong	2200000	8600000	41999.8	42003.8	4	5478.58
3532231	83	4.91	1.99609	0	11	0	0	0	0	0	0	0	0	0	0	1	0		0	0	2	Male	Private residence/accommodation	G61A	Saturday	N	0	0	1	1	1	2	G61	Costing 2014-2015	Dandenong	4200000	8600000	41998.7	42000.7	2	2073.71
3522279	70	4.91	8.95313	1	11	0	1	0	0	0	0	0	1	0	0	1	0		0	0	5.13323	Male	Private residence/accommodation	Z61A	Friday	Y	1	0	1	1	1	2	Z61	Costing 2014-2015	Dandenong	2500000	8600000	41983.8	41992.8	9	9672.5
3520793	24	4.91	1.19531	0	11	0	0	0	0	0	0	0	0	0	0	1	0		0	0	1.20833	Male	Private residence/accommodation	J09Z	Wednesday	N	0	0	1	0	1	2	J09	Costing 2014-2015	Dandenong	2400000	8600000	41982.3	41983.5	1	2815.27
3523503	39	4.91	4.92969	1	11	0	0	0	0	0	0	0	0	1	0	1	0		0	0	2.91185	Male	Private residence/accommodation	H62B	Wednesday	N	0	0	1	0	1	2	H62	Costing 2014-2015	Dandenong	7200000	8600000	41985.5	41990.5	5	4766.56
3527739	45	4.91	6	1	11	0	0	0	0	0	0	0	0	0	0	1	0		0	0	4.0966	Male	Private residence/accommodation	G48B	Wednesday	N	0	0	1	0	1	2	G48	Costing 2014-2015	Dandenong	2400000	8600000	41991.8	41997.8	6	6801.71
3521414	60	4.91	1.69141	0	11	0	0	0	0	0	0	0	0	0	0	1	0		0	0	7.26373	Male	Left against Medical Advice	G47A	Thursday	N	0	0	1	1	1	2	G47	Costing 2014-2015	Dandenong	7900000	8600000	41982.8	41984.4	2	3120.95
3527192	73	4.91	11.168	1	11	0	0	0	0	0	0	0	0	0	0	1	0		0	0	11.1667	Male	Private residence/accommodation	G02A	Monday	Y	0	0	1	1	1	2	G02	Costing 2014-2015	Dandenong	2200000	8600000	41991.3	42002.5	11	17892.3
3530291	72	4.91	0.9375	0	11	0	0	0	0	0	0	0	0	0	0	1	0		0	0	7.7424	Male	Other acute hosp/ext care/rehab/geri ctr	Q61A	Tuesday	N	0	0	1	1	1	2	Q61	Costing 2014-2015	Dandenong	4400000	8600000	41995.7	41996.6	1	1432.22
3528546	62	4.91	11.9727	1	11	0	0	0	0	0	0	0	0	0	0	1	0		0	0	5.94244	Male	Private residence/accommodation	H08A	Wednesday	N	0	0	1	1	1	2	H08	Costing 2014-2015	Dandenong	2400000	8600000	41992.4	42004.4	12	12915.5
3523344	39	4.91	1.98438	0	11	0	0	0	0	0	0	0	0	0	0	1	0		0	0	3.57599	Male	Private residence/accommodation	H62B	Sunday	N	0	0	1	0	1	2	H62	Costing 2014-2015	Dandenong	4700000	8600000	41985.4	41987.4	2	1696.44
3520116	55	4.91	2.26172	0	11	0	0	0	0	0	0	0	0	1	0	1	0		0	0	3.77064	Male	Private residence/accommodation	G70A	Wednesday	N	0	0	1	1	1	2	G70	Costing 2014-2015	Dandenong	7900000	8600000	41981.4	41983.6	2	2015.74
3529162	56	4.91	3.97656	1	11	0	0	0	0	0	0	0	0	0	0	1	0		0	0	3.95833	Female	Private residence/accommodation	G04B	Wednesday	Y	0	0	1	0	1	2	G04	Costing 2014-2015	Dandenong	7200000	8600000	41993.6	41997.6	4	7036.73
3523868	70	4.91	1.83203	0	11	0	0	0	0	0	0	0	0	0	0	1	0		0	0	2.63327	Male	Private residence/accommodation	G61B	Sunday	N	0	0	1	0	1	2	G61	Costing 2014-2015	Dandenong	7100000	8600000	41985.8	41987.6	2	1602.48
3532067	79	4.91	7.5	1	11	0	0	0	0	0	0	0	0	0	0	1	0		0	0	3.75334	Male	Private residence/accommodation	H64A	Thursday	N	0	0	1	1	1	2	H64	Costing 2014-2015	Dandenong	2100000	8600000	41998	42005.5	7	6958.15
3521327	64	4.91	2.19141	1	11	0	0	0	0	0	0	0	0	0	0	1	0		0	0	2.16667	Male	Private residence/accommodation	H62B	Thursday	Y	0	0	1	0	1	2	H62	Costing 2014-2015	Dandenong	4100000	8600000	41982.5	41984.7	2	1969.75
3530313	51	4.91	8.85547	1	11	0	0	0	0	0	0	0	0	0	0	1	0		0	0	8.83333	Female	Private residence/accommodation	H60A	Wednesday	Y	0	0	1	1	1	2	H60	Costing 2014-2015	Dandenong	4400000	8600000	41995.6	42004.5	9	8722.35
3519968	42	4.91	1.14844	1	11	0	0	0	0	0	0	0	0	0	0	1	0		0	0	1.125	Male	Private residence/accommodation	G11Z	Tuesday	N	0	0	1	0	1	2	G11	Costing 2014-2015	Dandenong	7900000	8600000	41981.3	41982.4	1	3988.86
3532091	55	4.91	2.26563	0	11	0	0	0	0	0	0	0	0	0	0	1	0		0	0	4.28755	Male	Left against Medical Advice	H62B	Saturday	N	0	0	1	0	1	2	H62	Costing 2014-2015	Dandenong	7900000	8600000	41998.2	42000.5	2	1921.52
3528866	35	4.91	4.98828	1	11	0	0	0	0	0	0	0	0	0	0	1	0		0	0	2.39828	Female	Private residence/accommodation	X63B	Wednesday	N	0	0	1	0	1	2	X63	Costing 2014-2015	Dandenong	4100000	8600000	41992.7	41997.7	5	4519.78
3529123	57	4.91	4.18359	0	11	0	0	0	0	0	0	0	0	1	0	1	0		0	0	6.05212	Male	Private residence/accommodation	H63A	Wednesday	Y	0	0	1	1	1	2	H63	Costing 2014-2015	Dandenong	4300000	8600000	41993.6	41997.7	4	3848.26
3528841	69	4.91	9.25	1	11	0	0	0	0	0	0	0	0	1	0	1	0		0	0	4.84758	Male	Private residence/accommodation	H43B	Monday	N	0	0	1	0	1	2	H43	Costing 2014-2015	Dandenong	2100000	8600000	41993.3	42002.5	9	11969
3521407	84	4.91	3.69531	0	11	0	0	0	0	0	0	0	0	0	0	1	0		0	0	4.34465	Male	Private residence/accommodation	G46B	Saturday	N	0	0	1	0	1	2	G46	Costing 2014-2015	Dandenong	2200000	8600000	41982.7	41986.4	4	5401.74
3519884	50	4.91	11.1484	0	11	0	0	0	0	0	0	0	0	0	0	1	0		0	0	11.1667	Male	Private residence/accommodation	G02A	Friday	Y	0	0	1	1	1	2	G02	Costing 2014-2015	Dandenong	2300000	8600000	41981.3	41992.4	11	23095.7
3534314	48	4.91	1.75391	1	11	0	0	0	0	0	0	0	0	1	0	1	0		0	0	1.75	Male	Private residence/accommodation	G70B	Wednesday	N	0	0	1	0	1	2	G70	Costing 2014-2015	Dandenong	432611	8600000	42002.7	42004.4	2	2178.88
3526288	32	4.91	3.00391	1	11	0	0	0	0	0	0	0	0	0	0	1	0		0	0	2.40763	Female	Private residence/accommodation	G65B	Friday	N	0	0	1	0	1	2	G65	Costing 2014-2015	Dandenong	2500000	8600000	41989.4	41992.4	3	2765.86
3533676	34	4.91	1.51953	0	11	0	0	0	0	0	0	0	0	0	0	1	0		0	0	5.46876	Male	Left against Medical Advice	H63B	Tuesday	N	0	0	1	0	1	2	H63	Costing 2014-2015	Dandenong	7900000	8600000	42001.9	42003.4	2	3111.85
3524438	85	4.91	11.3867	1	11	0	0	0	0	0	0	0	0	0	0	1	0		0	0	5.84743	Male	Private residence/accommodation	H43A	Thursday	N	0	0	1	1	1	2	H43	Costing 2014-2015	Dandenong	829123	8600000	41987.1	41998.5	11	11668.5
3533320	51	4.91	1.53125	0	11	0	0	0	0	0	0	0	0	1	0	1	0		0	0	1.54167	Male	Private residence/accommodation	G66A	Monday	N	0	0	1	1	1	2	G66	Costing 2014-2015	Dandenong	2300000	8600000	42001.3	42002.8	1	1807.68
3526953	44	4.91	5.69141	0	11	0	0	0	0	0	0	0	0	0	0	1	0		0	0	8.38376	Female	Private residence/accommodation	G02B	Tuesday	Y	0	0	1	0	1	2	G02	Costing 2014-2015	Dandenong	4200000	8600000	41990.8	41996.5	6	11534.8
3527184	68	4.91	4.20703	0	11	0	0	0	0	0	0	0	0	0	0	1	0		0	0	4.20833	Female	Private residence/accommodation	G01B	Monday	N	0	0	1	0	1	2	G01	Costing 2014-2015	Dandenong	7900000	8600000	41991.3	41995.5	4	13051
3520125	61	4.91	2.08203	0	11	0	0	0	0	0	0	0	0	0	0	1	0		0	0	4.19782	Female	Private residence/accommodation	G65A	Wednesday	N	0	0	1	1	1	2	G65	Costing 2014-2015	Dandenong	2400000	8600000	41981.4	41983.5	2	2575.39
3534549	52	4.91	2.32813	0	11	0	0	0	0	0	0	0	0	0	0	1	0		0	0	4.35476	Male	Private residence/accommodation	G67A	Thursday	N	0	0	1	1	1	2	G67	Costing 2014-2015	Dandenong	7900000	8600000	42003.2	42005.5	2	3049.58
3528910	68	4.91	4.64453	0	11	0	0	0	0	0	0	0	0	0	0	1	0		0	0	5.91077	Male	Private residence/accommodation	G46B	Wednesday	N	0	0	1	0	1	2	G46	Costing 2014-2015	Dandenong	4600000	8600000	41993	41997.7	4	12747.8
3533953	60	4.91	0.632813	1	11	0	0	0	0	0	0	0	0	1	0	1	0		0	0	0.625	Male	Left against Medical Advice	G60A	Tuesday	N	0	0	1	1	1	2	G60	Costing 2014-2015	Dandenong	2300000	8600000	42002.4	42003	1	1079.55
3520814	34	4.91	1.14453	1	11	0	0	0	0	0	0	0	0	0	0	1	0		0	0	1.125	Male	Private residence/accommodation	G11Z	Wednesday	N	0	0	1	0	1	2	G11	Costing 2014-2015	Dandenong	4100000	8600000	41982.3	41983.5	1	2822.37
3521212	41	4.91	1.32422	0	11	0	0	0	0	0	0	0	0	0	0	1	0		0	0	1.33333	Female	Private residence/accommodation	G11Z	Wednesday	N	0	0	1	0	1	2	G11	Costing 2014-2015	Dandenong	4400000	8600000	41982.3	41983.6	1	2541.74
3521358	78	4.91	6.86719	1	11	0	0	0	0	0	0	0	0	0	0	1	0		0	0	6.83333	Female	Aged care residential facility	G61A	Tuesday	Y	0	0	1	1	1	2	G61	Costing 2014-2015	Dandenong	4200000	8600000	41982.5	41989.4	7	7106.79
3524920	81	4.91	2.90234	0	11	0	0	0	0	0	0	0	0	0	0	1	0		0	0	7.41472	Male	Private residence/accommodation	G47A	Thursday	N	0	0	1	1	1	2	G47	Costing 2014-2015	Dandenong	7900000	8600000	41988.5	41991.4	3	3966.37
3536041	30	4.91	0.171875	1	11	0	0	0	0	0	0	0	0	0	0	1	0		0	0	0.166667	Male	Left against Medical Advice	X60B	Thursday	N	0	0	1	0	1	2	X60	Costing 2014-2015	Dandenong	7300000	8600000	42005.5	42005.7	1	273.818
3528278	88	4.91	3.33203	0	11	0	0	0	0	0	0	0	0	0	0	1	0		0	0	6.47483	Male	Private residence/accommodation	Q61A	Monday	N	0	0	1	1	1	2	Q61	Costing 2014-2015	Dandenong	7700000	8600000	41992.5	41995.8	3	3820.38
3527123	33	4.91	2.90625	1	11	0	0	0	0	0	0	0	0	0	0	1	0		0	0	2.875	Male	Private residence/accommodation	G70B	Saturday	N	0	0	1	0	1	2	G70	Costing 2014-2015	Dandenong	7500000	8600000	41990.6	41993.5	3	3622.06
3535063	76	4.91	2.86719	0	11	0	0	0	0	0	0	0	0	0	0	1	0		0	0	3.2278	Female	Private residence/accommodation	G70A	Friday	N	0	0	1	1	1	2	G70	Costing 2014-2015	Dandenong	2300000	8600000	42003.8	42006.7	3	3899.53
3526221	74	4.91	0.878906	0	11	0	0	0	0	0	0	0	0	0	0	1	0		0	0	5.96033	Male	Private residence/accommodation	H64A	Wednesday	N	0	0	1	1	1	2	H64	Costing 2014-2015	Dandenong	2200000	8600000	41989.8	41990.7	1	1579.94
3519937	84	4.91	8.30469	1	11	0	0	0	0	0	0	0	0	0	0	1	0		0	0	5.08935	Female	Private residence/accommodation	G61A	Tuesday	Y	0	0	1	1	1	2	G61	Costing 2014-2015	Dandenong	7800000	8600000	41981.2	41989.5	8	8396.68
3534418	63	4.91	0.390625	1	11	0	0	0	0	0	0	0	0	0	0	1	0		0	0	0.375	Male	Private residence/accommodation	Z61B	Monday	N	0	0	1	0	1	2	Z61	Costing 2014-2015	Dandenong	2300000	8600000	42002.5	42002.9	1	652.679
3521800	52	4.91	6.25	0	11	0	0	1	0	0	0	0	1	0	0	1	0		0	0	12.5586	Male	Private residence/accommodation	F40A	Tuesday	Y	1	0	1	1	1	2	F40	Costing 2014-2015	Dandenong	7200000	8600000	41983.5	41989.7	6	14682.2
3533938	47	4.91	2.18359	0	11	0	0	0	0	0	0	0	0	0	0	1	0		0	0	5.00405	Female	Private residence/accommodation	H60B	Wednesday	N	0	0	1	0	1	2	H60	Costing 2014-2015	Dandenong	2300000	8600000	42002.3	42004.5	2	2911.39
3525950	22	4.91	3.10156	0	11	0	0	0	0	0	0	0	0	0	0	1	0		0	0	3.35144	Male	Private residence/accommodation	H62B	Friday	N	0	0	1	0	1	2	H62	Costing 2014-2015	Dandenong	2400000	8600000	41989.5	41992.6	3	3218.01
3526929	39	4.91	2.94922	0	11	0	0	0	0	0	0	0	0	0	0	1	0		0	0	3.57599	Female	Private residence/accommodation	H62B	Saturday	N	0	0	1	0	1	2	H62	Costing 2014-2015	Dandenong	751532	8600000	41990.6	41993.6	3	3022.46
3519087	77	4.91	11.5703	0	11	0	0	0	1	0	0	1	2	0	0	1	0		0	0	11.8948	Male	Other acute hosp/ext care/rehab/geri ctr	H08A	Wednesday	Y	1	0	1	1	1	2	H08	Costing 2014-2015	Dandenong	2300000	8600000	41979.1	41990.6	11	23631.6
3526374	63	4.91	1.14453	0	11	0	0	0	0	0	0	0	0	0	0	1	0		0	0	1.16667	Female	Private residence/accommodation	G48B	Thursday	N	0	0	1	0	1	2	G48	Costing 2014-2015	Dandenong	7900000	8600000	41990.3	41991.4	1	4796.17
3528092	50	4.91	10.5938	1	11	0	0	0	0	0	0	0	0	0	0	1	0		0	0	10.5833	Female	Private residence/accommodation	G01A	Monday	Y	0	0	1	1	1	2	G01	Costing 2014-2015	Dandenong	279188	8600000	41992	42002.6	11	15962.9
3521747	71	4.91	7.90625	1	11	0	0	0	0	0	0	0	0	0	0	1	0		0	0	4.84758	Female	Private residence/accommodation	H43B	Thursday	N	0	0	1	0	1	2	H43	Costing 2014-2015	Dandenong	4400000	8600000	41983.5	41991.4	8	9157.77
3522390	60	4.91	22.3789	1	11	0	0	0	0	0	0	0	0	0	0	1	0		14.0146	20181	8.40208	Female	Private residence/accommodation	G04C	Friday	N	0	0	1	0	1	2	G04	Costing 2014-2015	Dandenong	7200000	8600000	41984.3	42006.7	18	20445.4
3531220	40	4.91	2.88672	1	11	0	0	0	0	0	0	0	0	0	0	1	0		0	0	2.44634	Female	Private residence/accommodation	G65B	Friday	N	0	0	1	0	1	2	G65	Costing 2014-2015	Dandenong	4000000	8600000	41996.9	41999.7	3	2914.42
3525863	63	4.91	6.92188	1	11	0	0	0	0	0	0	0	0	0	0	1	0		0	0	6.91667	Male	Aged care residential facility	G60B	Tuesday	N	0	0	1	0	1	2	G60	Costing 2014-2015	Dandenong	807097	8600000	41989.4	41996.3	7	5802.33
3535533	52	4.91	1.86328	0	11	0	0	0	0	0	0	0	0	0	0	1	0		0	0	1.875	Male	Private residence/accommodation	G64B	Friday	Y	0	0	1	0	1	2	G64	Costing 2014-2015	Dandenong	2400000	8600000	42004.6	42006.4	2	1991.55
3531976	74	4.91	1.02344	1	11	0	0	0	0	0	0	0	0	0	0	1	0		0	0	1	Male	Private residence/accommodation	G48B	Thursday	N	0	0	1	0	1	2	G48	Costing 2014-2015	Dandenong	4300000	8600000	41997.4	41998.4	1	3366.59
3526358	62	4.91	5.74219	1	11	0	0	0	0	0	0	0	0	0	0	1	0		0	0	5.70833	Male	Private residence/accommodation	X63B	Monday	N	0	0	1	0	1	2	X63	Costing 2014-2015	Dandenong	4600000	8600000	41989.7	41995.5	6	7796.31
3523055	52	4.91	6.08984	1	11	0	0	0	0	0	0	0	0	0	0	1	0		0	0	6.08333	Male	Private residence/accommodation	G12C	Wednesday	Y	0	0	1	0	1	2	G12	Costing 2014-2015	Dandenong	7900000	8600000	41984.5	41990.6	6	5777.01
3531881	58	4.91	5.58984	1	11	0	0	0	0	0	0	0	0	0	0	1	0		0	0	2.93456	Male	Private residence/accommodation	H62B	Tuesday	N	0	0	1	0	1	2	H62	Costing 2014-2015	Dandenong	2400000	8600000	41997.8	42003.4	6	5043.85
3533835	75	4.91	1.57031	1	11	0	0	0	0	0	0	0	0	0	0	1	0		0	0	1.54167	Male	Aged care residential facility	G65B	Tuesday	N	0	0	1	0	1	2	G65	Costing 2014-2015	Dandenong	886094	8600000	42002	42003.6	1	1487.61
3520442	31	4.91	1.69531	1	11	0	0	0	0	0	0	0	0	0	0	1	0		0	0	1.56751	Female	Private residence/accommodation	H64B	Wednesday	N	0	0	1	0	1	2	H64	Costing 2014-2015	Dandenong	4400000	8600000	41981.9	41983.6	2	1607.9
3532065	51	4.91	3.69922	1	11	0	0	0	0	0	0	0	0	0	0	1	0		0	0	2.61239	Male	Private residence/accommodation	G65B	Sunday	N	0	0	1	0	1	2	G65	Costing 2014-2015	Dandenong	475442	8600000	41998	42001.7	4	3328.55
3552892	68	4.6	1.11719	1	12	0	0	0	0	0	0	0	0	0	0	0	1		0	0	1.08333	Male	Private residence/accommodation	G48B	Thursday	N	0	0	1	0	1	2	G48	Costing 2014-2015	Dandenong	2200000	8700000	42032.3	42033.4	1	5838.62
3542851	55	4.6	5.66406	1	12	0	0	0	0	0	0	0	0	0	0	0	1		0	0	5.625	Male	Private residence/accommodation	E62C	Wednesday	N	0	0	1	0	1	2	E62	Costing 2014-2015	Dandenong	4600000	8600000	42012.8	42018.4	6	5178.7
3550106	70	4.6	2.50391	1	12	0	0	0	0	0	0	0	0	0	0	0	1		0	0	2.5	Male	Private residence/accommodation	G10B	Sunday	N	0	0	1	0	1	2	G10	Costing 2014-2015	Dandenong	4100000	8600000	42027.3	42029.8	2	5586.31
3552112	41	4.6	6.18359	1	12	0	0	0	0	0	0	0	0	0	0	0	1		0	0	6.16667	Male	Private residence/accommodation	G02A	Monday	Y	0	0	1	1	1	2	G02	Costing 2014-2015	Dandenong	7300000	8700000	42031.3	42037.5	6	11155.9
3551197	78	4.6	11.5156	1	12	0	0	0	0	0	0	0	0	0	0	0	1		0	0	7.26035	Male	Other acute hosp/ext care/rehab/geri ctr	G61A	Thursday	Y	0	0	1	1	1	2	G61	Costing 2014-2015	Dandenong	7100000	8700000	42028.9	42040.4	12	9378.8
3546116	87	4.6	2.52344	1	12	0	0	0	0	0	0	0	0	0	0	0	1		0	0	2.51	Female	Private residence/accommodation	G61B	Monday	N	0	0	1	0	1	2	G61	Costing 2014-2015	Dandenong	7900000	8600000	42020.9	42023.5	3	2425.5
3546042	91	4.6	3.11719	0	12	1	0	0	0	0	0	0	0	0	0	0	1		0	0	6.56719	Female	Death	G70A	Tuesday	N	0	0	1	1	1	2	G70	Costing 2014-2015	Dandenong	7100000	8600000	42021.2	42024.3	3	6403.19
3549116	48	4.6	1.86328	1	12	0	0	0	0	0	0	0	0	1	0	0	1		0	0	1.67275	Female	Private residence/accommodation	G11Z	Friday	N	0	0	1	0	1	2	G11	Costing 2014-2015	Dandenong	456463	8600000	42025.7	42027.5	2	3923.56
3547779	52	4.6	3.35156	1	12	0	0	0	0	0	0	0	0	0	0	0	1		0	0	3.33333	Female	Private residence/accommodation	G04C	Friday	N	0	0	1	0	1	2	G04	Costing 2014-2015	Dandenong	480703	8600000	42024.3	42027.7	3	6084.43
3546719	48	4.6	4.94531	0	12	0	0	0	0	0	0	0	0	0	0	0	1		0	0	5.83225	Male	Private residence/accommodation	H62A	Friday	N	0	0	1	1	1	2	H62	Costing 2014-2015	Dandenong	2500000	8600000	42022.7	42027.7	5	4432.32
3552883	61	4.6	5.17969	1	12	0	0	0	0	0	0	0	0	0	0	0	1		0	0	5.16667	Female	Private residence/accommodation	G02A	Monday	Y	0	0	1	1	1	2	G02	Costing 2014-2015	Dandenong	2100000	8700000	42032.3	42037.5	5	11434.1
3542030	43	4.6	17.9609	0	12	0	0	0	0	0	1	0	1	1	0	0	1		0	0	18	Male	Private residence/accommodation	G01A	Thursday	Y	1	0	1	1	1	2	G01	Costing 2014-2015	Dandenong	4700000	8600000	42015.6	42033.5	18	28486
3540653	50	4.6	6.78516	0	12	0	0	0	0	0	0	0	0	0	0	0	1		0	0	8.50403	Male	Private residence/accommodation	G46A	Thursday	Y	0	0	1	1	1	2	G46	Costing 2014-2015	Dandenong	7900000	8600000	42012.9	42019.7	7	9461.89
3555747	32	4.6	3.64453	1	12	0	0	0	0	0	0	0	0	0	0	0	1		0	0	3.625	Male	Private residence/accommodation	H62A	Wednesday	N	0	0	1	1	1	2	H62	Costing 2014-2015	Dandenong	2400000	8700000	42036	42039.6	4	3375.64
3549998	82	4.6	7.84375	1	12	0	0	0	0	0	0	0	0	0	0	0	1		0	0	7.83333	Male	Private residence/accommodation	H08A	Friday	Y	0	0	1	1	1	2	H08	Costing 2014-2015	Dandenong	7900000	8600000	42026.9	42034.7	8	11303.6
3554217	86	4.6	8.78516	0	12	0	0	0	0	0	0	0	0	0	0	0	1		0	0	8.79167	Female	Private residence/accommodation	G48A	Saturday	Y	0	0	1	1	1	2	G48	Costing 2014-2015	Dandenong	4700000	8700000	42033.8	42042.5	9	9858.77
3556939	40	4.6	23.3828	1	12	0	0	0	0	0	0	0	0	0	0	0	1		0	0	23.375	Male	Other acute hosp/ext care/rehab/geri ctr	L09A	Thursday	Y	0	0	1	1	1	2	L09	Costing 2014-2015	Dandenong	4700000	8700000	42038	42061.4	23	21047.6
3548342	36	4.6	3.86328	0	12	0	0	0	0	0	0	0	0	0	0	0	1		0	0	3.95573	Female	Private residence/accommodation	G70A	Saturday	Y	0	0	1	1	1	2	G70	Costing 2014-2015	Dandenong	4300000	8600000	42024.7	42028.6	4	3856.75
3547125	71	4.6	8.125	1	12	0	0	0	0	0	0	0	0	0	0	0	1		0	0	7.41913	Male	Private residence/accommodation	G48A	Tuesday	Y	0	0	1	1	1	2	G48	Costing 2014-2015	Dandenong	7900000	8600000	42023.4	42031.6	8	16371.8
3538220	57	4.6	1.86328	0	12	0	0	0	0	0	0	0	0	0	0	0	1		0	0	4.69409	Male	Private residence/accommodation	H60B	Wednesday	N	0	0	1	0	1	2	H60	Costing 2014-2015	Dandenong	344113	8600000	42009.8	42011.7	2	2190.53
3548487	65	4.6	23.418	0	12	0	0	0	0	0	0	0	0	0	0	0	1		0	0	23.4583	Male	Private residence/accommodation	G01A	Friday	Y	0	0	1	1	1	2	G01	Costing 2014-2015	Dandenong	7900000	8600000	42025.3	42048.7	23	59467.7
3554079	69	4.6	63.0313	1	12	0	0	0	0	0	0	1	1	0	0	0	1		42.85	61704	17.2874	Female	Private residence/accommodation	G01A	Thursday	Y	1	0	1	1	1	2	G01
3550983	69	4.6	2.10547	0	12	0	0	0	0	0	0	0	0	0	0	0	1		0	0	2.125	Female	Private residence/accommodation	G70B	Monday	N	0	0	1	0	1	2	G70	Costing 2014-2015	Dandenong	700603	8700000	42028.6	42030.7	2	1821.4
3546857	53	4.6	8.11328	0	12	0	0	0	0	0	0	0	0	0	0	0	1		0	0	8.125	Female	Private residence/accommodation	G02A	Tuesday	Y	0	0	1	1	1	2	G02	Costing 2014-2015	Dandenong	7800000	8600000	42023.3	42031.4	8	21045.1
3545110	88	4.6	5.03125	1	12	0	0	0	0	0	0	0	0	0	0	0	1		0	0	5	Male	Aged care residential facility	G61A	Tuesday	N	0	0	1	1	1	2	G61	Costing 2014-2015	Dandenong	289097	8600000	42019.5	42024.5	5	17176.9
3550456	57	4.6	10.1016	1	12	0	0	0	0	0	0	1	1	0	0	0	1		0	0	8.43799	Female	Private residence/accommodation	G48A	Monday	N	1	0	1	1	1	2	G48	Costing 2014-2015	Dandenong	4100000	8600000	42027.6	42037.7	10	15632.4
3557374	63	4.6	8.87891	1	12	0	0	0	0	0	0	0	0	0	0	0	1		0	0	8.875	Male	Private residence/accommodation	G02A	Thursday	Y	0	0	1	1	1	2	G02	Costing 2014-2015	Dandenong	2100000	8700000	42038.6	42047.5	9	12437.8
3537532	70	4.6	8.77344	0	12	0	0	0	0	0	0	1	1	0	0	0	1		0	0	8.79167	Female	Other acute hosp/ext care/rehab/geri ctr	G01A	Tuesday	Y	1	0	1	1	1	2	G01	Costing 2014-2015	Dandenong	7900000	8600000	42008.6	42017.3	9	19633.1
3550777	56	4.6	4.37109	1	12	0	0	0	0	0	0	0	0	0	0	0	1		0	0	1.95102	Male	Private residence/accommodation	I68B	Wednesday	Y	0	0	1	0	1	2	I68	Costing 2014-2015	Dandenong	7300000	8700000	42028.1	42032.5	4	5309.59
3556404	63	4.6	9.08203	0	12	0	0	0	0	0	0	1	1	0	0	0	1		0	0	9.08333	Male	Private residence/accommodation	G02A	Wednesday	Y	1	0	1	1	1	2	G02	Costing 2014-2015	Dandenong	807097	8700000	42037.5	42046.6	9	14347.2
3547388	78	4.6	8.78125	1	12	0	0	0	0	0	0	0	0	0	0	0	1		0	0	7.00749	Male	Private residence/accommodation	H43A	Wednesday	Y	0	0	1	1	1	2	H43	Costing 2014-2015	Dandenong	7900000	8600000	42023.8	42032.6	9	8628.24
3539136	84	4.6	2.58203	0	12	0	0	0	0	0	0	0	0	0	0	0	1		0	0	2.58333	Male	Private residence/accommodation	G48A	Friday	N	0	0	1	1	1	2	G48	Costing 2014-2015	Dandenong	2500000	8600000	42010.9	42013.5	3	3825.66
3556659	77	4.6	3.97656	1	12	0	0	0	0	0	0	0	0	0	0	0	1		0	0	3.59792	Female	Private residence/accommodation	L63B	Friday	N	0	0	1	0	1	2	L63	Costing 2014-2015	Dandenong	2000000	8700000	42037.8	42041.8	4	4011.52
3542667	38	4.6	0.792969	0	12	0	0	0	0	0	0	0	0	0	0	0	1		0	0	1.67278	Male	Private residence/accommodation	G61B	Tuesday	N	0	0	1	0	1	2	G61	Costing 2014-2015	Dandenong	2200000	8600000	42016.7	42017.4	1	748.684
3550737	77	4.6	9.30469	1	12	0	0	0	1	0	0	1	2	0	0	0	1		0	0	4.58181	Male	Private residence/accommodation	G61A	Monday	N	1	0	1	1	1	2	G61	Costing 2014-2015	Dandenong	7900000	8600000	42028.4	42037.7	9	30392.3
3547716	39	4.6	1.16797	0	12	0	0	0	0	0	0	0	0	0	0	0	1		0	0	2.04369	Female	Private residence/accommodation	L63B	Wednesday	N	0	0	1	0	1	2	L63	Costing 2014-2015	Dandenong	2300000	8600000	42024.3	42025.4	1	1713.71
3550816	53	4.6	0.972656	0	12	0	0	0	0	0	0	0	0	0	0	0	1		0	0	1.74028	Male	Other acute hosp/ext care/rehab/geri ctr	H62B	Sunday	N	0	0	1	0	1	2	H62	Costing 2014-2015	Dandenong	4000000	8700000	42028.1	42029.1	1	1727.85
3549202	20	4.6	4.66406	1	12	0	0	0	0	0	0	0	0	0	0	0	1		0	0	4.01729	Female	Private residence/accommodation	G64A	Monday	Y	0	0	1	1	1	2	G64	Costing 2014-2015	Dandenong	2500000	8600000	42026	42030.7	5	4166.95
3546387	39	4.6	5.91016	1	12	0	0	0	0	0	0	0	0	0	0	0	1		0	0	5.83225	Male	Private residence/accommodation	H62A	Friday	N	0	0	1	1	1	2	H62	Costing 2014-2015	Dandenong	4500000	8600000	42021.7	42027.6	6	5820.93
3552689	26	4.6	1.61719	0	12	0	0	0	0	0	0	0	0	1	0	0	1		0	0	2.23543	Male	Private residence/accommodation	G04C	Thursday	N	0	0	1	0	1	2	G04	Costing 2014-2015	Dandenong	7900000	8700000	42031.8	42033.4	2	4149.81
3557891	57	4.6	1.23047	0	12	0	0	0	0	0	0	0	0	1	0	0	1		0	0	1.25	Female	Private residence/accommodation	L64B	Thursday	N	0	0	1	0	1	2	L64	Costing 2014-2015	Dandenong	7900000	8700000	42039.4	42040.7	1	2193.83
3539052	62	4.6	6.02344	1	12	0	0	0	0	0	0	0	0	0	0	0	1		0	0	2.69464	Male	Private residence/accommodation	G67A	Monday	N	0	0	1	1	1	2	G67	Costing 2014-2015	Dandenong	473203	8600000	42010.7	42016.7	6	5608.15
3552131	22	4.6	3.41797	1	12	0	0	0	0	0	0	0	0	0	0	0	1		0	0	3.35144	Female	Private residence/accommodation	H62B	Friday	N	0	0	1	0	1	2	H62	Costing 2014-2015	Dandenong	2400000	8700000	42031.1	42034.5	3	2939.88
3541302	76	4.6	4.76953	1	12	0	0	0	0	0	0	0	0	0	0	0	1		0	0	2.49639	Male	Private residence/accommodation	G47B	Wednesday	N	0	0	1	0	1	2	G47	Costing 2014-2015	Dandenong	865626	8600000	42013.8	42018.6	5	4273.74
3555660	76	4.6	8.125	0	12	1	0	0	1	0	0	1	2	0	0	0	1		0	0	8.125	Female	Death	A06C	Sunday	Y	1	0	1	0	1	2	A06	Costing 2014-2015	Dandenong	4200000	8700000	42035.8	42043.9	8	30111.1
3552721	46	4.6	15.5234	1	12	0	0	1	1	0	0	1	3	0	0	0	1		0	0	12.5295	Female	Other acute hosp/ext care/rehab/geri ctr	H60A	Thursday	Y	1	0	1	1	1	2	H60	Costing 2014-2015	Dandenong	2400000	8700000	42031.9	42047.4	16	23045.6
3537759	44	4.6	66.1914	1	12	0	0	0	0	0	0	1	1	0	0	0	1		12.0354	17331	13.9882	Female	Private residence/accommodation	G01A	Thursday	Y	1	0	1	1	1	2	G01	Costing 2014-2015	Dandenong	4400000	8600000	42009.3	42075.4	60	72951.1
3543049	50	4.6	0.417969	1	12	0	0	0	0	0	0	0	0	0	0	0	1		0	0	0.416667	Female	Other acute hosp/ext care/rehab/geri ctr	T61A	Tuesday	N	0	0	1	1	1	2	T61	Costing 2014-2015	Dandenong	4400000	8600000	42017.2	42017.6	1	400.265
3541125	42	4.6	7.125	0	12	0	0	0	0	0	0	0	0	0	0	0	1		0	0	7.125	Female	Private residence/accommodation	H63B	Friday	N	0	0	1	0	1	2	H63	Costing 2014-2015	Dandenong	4400000	8600000	42013.6	42020.7	7	6927.22
3541543	52	4.6	4.51563	0	12	0	0	0	0	0	0	0	0	0	0	0	1		0	0	5.91868	Male	Private residence/accommodation	H62A	Wednesday	N	0	0	1	1	1	2	H62	Costing 2014-2015	Dandenong	4100000	8600000	42014.1	42018.6	4	3983.65
3543824	42	4.6	1.21484	1	12	0	0	0	0	0	0	0	0	0	0	0	1		0	0	1.20833	Male	Private residence/accommodation	G07B	Thursday	N	0	0	1	0	1	2	G07	Costing 2014-2015	Dandenong	2200000	8600000	42018.3	42019.5	1	5916.76
3551304	28	4.6	2.91797	1	12	0	0	0	0	0	0	0	0	0	0	0	1		0	0	1.77177	Male	Private residence/accommodation	G07B	Tuesday	N	0	0	1	0	1	2	G07	Costing 2014-2015	Dandenong	7900000	8700000	42028.5	42031.5	3	6276.55
3545503	81	4.6	4.21094	0	12	0	0	0	0	0	0	0	0	0	0	0	1		0	0	4.70994	Female	Private residence/accommodation	G47B	Tuesday	Y	0	0	1	0	1	2	G47	Costing 2014-2015	Dandenong	2500000	8600000	42020.5	42024.7	4	5716.47
3537608	62	4.6	4.80469	1	12	0	0	0	0	0	0	0	0	0	0	0	1		0	0	4.79167	Male	Private residence/accommodation	G47B	Friday	N	0	0	1	0	1	2	G47	Costing 2014-2015	Dandenong	7900000	8600000	42008.8	42013.6	5	5106.74
3538312	88	4.6	16.9648	0	12	0	0	0	0	0	0	1	1	0	0	0	1		0	0	21.5662	Female	Statistical Separation	G02A	Thursday	Y	1	0	1	1	1	2	G02	Costing 2014-2015	Dandenong	2200000	8600000	42009.6	42026.6	17	48947.6
3548093	48	4.6	0.925781	0	12	0	0	0	0	0	0	0	0	0	0	0	1		0	0	0.958333	Male	Private residence/accommodation	G48B	Wednesday	N	0	0	1	0	1	2	G48	Costing 2014-2015	Dandenong	2100000	8600000	42024.6	42025.5	1	1521.94
3544440	45	4.6	10.7422	1	12	0	0	0	0	0	0	1	1	0	0	0	1		0	0	9.17355	Female	Private residence/accommodation	G02A	Sunday	Y	1	0	1	1	1	2	G02	Costing 2014-2015	Dandenong	7800000	8600000	42018.8	42029.5	11	22472.8
3555605	45	4.6	2.06641	0	12	0	0	0	0	0	0	0	0	1	0	0	1		0	0	2.44634	Female	Private residence/accommodation	G65B	Monday	N	0	0	1	0	1	2	G65	Costing 2014-2015	Dandenong	4000000	8700000	42035.6	42037.7	2	2825.83
3559739	66	4.6	3.64063	0	12	0	0	0	0	0	0	0	0	0	0	0	1		0	0	3.91694	Male	Private residence/accommodation	G65A	Tuesday	N	0	0	1	1	1	2	G65	Costing 2014-2015	Dandenong	7600000	8700000	42041.7	42045.3	4	3562.26
3540960	53	4.6	1.97266	0	12	0	0	0	0	0	0	0	0	0	0	0	1		0	0	2.59226	Male	Private residence/accommodation	G70B	Sunday	N	0	0	1	0	1	2	G70	Costing 2014-2015	Dandenong	4200000	8600000	42013.5	42015.5	2	1851.23
3543587	37	4.6	1.33984	0	12	0	0	0	0	0	0	0	0	0	0	0	1		0	0	1.67275	Male	Private residence/accommodation	G11Z	Wednesday	N	0	0	1	0	1	2	G11	Costing 2014-2015	Dandenong	7100000	8600000	42017.4	42018.7	1	2858.55
3538512	83	4.6	13.1875	1	12	0	0	0	0	0	0	0	0	0	0	0	1		0	0	13.1667	Female	Private residence/accommodation	X06A	Monday	Y	0	0	1	1	1	2	X06	Costing 2014-2015	Dandenong	2000000	8600000	42010.3	42023.5	13	22143.7
3543622	85	4.6	1.94141	0	12	0	0	0	0	0	0	0	0	0	0	0	1		0	0	2.90928	Male	Private residence/accommodation	G47B	Thursday	N	0	0	1	0	1	2	G47	Costing 2014-2015	Dandenong	2100000	8600000	42017.5	42019.4	2	2722.02
3544436	38	4.6	2.08203	0	12	0	0	0	0	0	0	0	0	1	0	0	1		0	0	8.14157	Male	Left against Medical Advice	H60A	Friday	Y	0	0	1	1	1	2	H60	Costing 2014-2015	Dandenong	2100000	8600000	42018.7	42020.8	2	3667.57
3542751	80	4.6	1.75391	0	12	0	0	0	0	0	0	0	0	0	0	0	1		0	0	6.04369	Female	Private residence/accommodation	G46B	Wednesday	N	0	0	1	0	1	2	G46	Costing 2014-2015	Dandenong	2200000	8600000	42016.8	42018.5	2	3064.5
3553464	64	4.6	8.88281	1	12	0	0	0	0	0	0	0	0	0	0	0	1		0	0	7.26373	Female	Private residence/accommodation	G47A	Friday	Y	0	0	1	1	1	2	G47	Costing 2014-2015	Dandenong	2400000	8700000	42032.8	42041.7	9	9399.61
3554419	68	4.6	8.65625	0	12	0	0	0	2	0	0	1	3	0	0	0	1		0	0	8.66667	Female	Other acute hosp/ext care/rehab/geri ctr	G70A	Sunday	Y	1	0	1	1	1	2	G70	Costing 2014-2015	Dandenong	7900000	8700000	42027.9	42036.6	9	10641.1
3551937	82	4.6	4.80469	0	12	0	0	0	0	0	0	0	0	0	0	0	1		0	0	8.36238	Female	Private residence/accommodation	G48A	Saturday	N	0	0	1	1	1	2	G48	Costing 2014-2015	Dandenong	4400000	8700000	42030.7	42035.5	5	9444.99
3556174	75	4.6	13.4336	1	12	0	0	0	4	0	0	1	5	0	0	0	1		0	0	9.02464	Male	Private residence/accommodation	H43A	Sunday	Y	1	0	1	1	1	2	H43	Costing 2014-2015	Dandenong	746112	8700000	42037.2	42050.6	13	29920.5
3541295	38	4.6	1.14063	0	12	0	0	0	0	0	0	0	0	0	0	0	1		0	0	2.50186	Male	Private residence/accommodation	F75B	Saturday	N	0	0	1	0	1	2	F75	Costing 2014-2015	Dandenong	2200000	8600000	42013.6	42014.7	1	2295.9
3542098	45	4.6	4.96094	1	12	0	0	0	0	0	0	0	0	0	0	0	1		0	0	4.30032	Male	Private residence/accommodation	H08A	Friday	N	0	0	1	1	1	2	H08	Costing 2014-2015	Dandenong	4200000	8600000	42015.6	42020.6	5	9312.14
3554387	50	4.6	3.92188	0	12	0	0	0	0	0	0	0	0	0	0	0	1		0	0	3.95833	Female	Private residence/accommodation	G66A	Monday	N	0	0	1	1	1	2	G66	Costing 2014-2015	Dandenong	4300000	8700000	42033.5	42037.4	4	5100.25
3538793	67	4.6	2.15625	0	12	0	0	0	0	0	0	0	0	0	0	0	1		0	0	4.13842	Male	Private residence/accommodation	G47B	Thursday	N	0	0	1	0	1	2	G47	Costing 2014-2015	Dandenong	2300000	8600000	42010.6	42012.7	2	3865.32
3550739	80	4.6	4.67969	1	12	0	0	0	0	0	0	0	0	1	0	0	1		0	0	2.99193	Male	Private residence/accommodation	H61B	Wednesday	N	0	0	1	0	1	2	H61	Costing 2014-2015	Dandenong	4200000	8600000	42027.9	42032.6	5	4565.37
3556901	68	4.6	8.46094	1	12	0	0	0	1	0	0	0	1	0	0	0	1		0	0	8.45833	Male	Private residence/accommodation	G02A	Wednesday	Y	1	0	1	1	1	2	G02	Costing 2014-2015	Dandenong	7700000	8700000	42038.3	42046.7	8	15966.3
3548328	23	4.6	3.85156	1	12	0	0	0	0	0	0	0	0	0	0	0	1		0	0	3.83333	Male	Private residence/accommodation	G48B	Saturday	N	0	0	1	0	1	2	G48	Costing 2014-2015	Dandenong	478167	8600000	42024.6	42028.5	4	4796.95
3550329	85	4.6	14.0781	0	12	0	0	0	2	0	0	0	2	0	0	0	1		0	0	14.0833	Male	Statistical Separation	G11Z	Friday	Y	1	0	1	0	1	2	G11	Costing 2014-2015	Dandenong	2500000	8600000	42027.5	42041.6	14	14604.1
3556952	34	4.6	1.34375	0	12	0	0	0	0	0	0	0	0	0	0	0	1		0	0	2.07037	Male	Private residence/accommodation	J08B	Wednesday	N	0	0	1	0	1	2	J08	Costing 2014-2015	Dandenong	7900000	8700000	42038.3	42039.6	1	3040.27
3539088	74	4.6	13.2422	1	12	0	0	0	0	0	0	0	0	0	0	0	1		0	0	13.2083	Female	Private residence/accommodation	G01A	Tuesday	Y	0	0	1	1	1	2	G01	Costing 2014-2015	Dandenong	713224	8600000	42011.3	42024.5	13	21701.6
3544534	31	4.6	3.26172	1	12	0	0	0	0	0	0	0	0	0	0	0	1		0	0	2.73432	Female	Private residence/accommodation	H62B	Sunday	Y	0	0	1	0	1	2	H62	Costing 2014-2015	Dandenong	813781	8600000	42019.2	42022.4	3	2783.31
3548908	27	4.6	7.84375	1	12	0	0	0	0	0	0	0	0	0	0	0	1		0	0	3.05278	Female	Private residence/accommodation	H08B	Thursday	N	0	0	1	0	1	2	H08	Costing 2014-2015	Dandenong	4700000	8600000	42025.7	42033.5	8	10188.1
3540605	60	4.6	8.76563	1	12	0	0	0	0	0	0	0	0	0	0	0	1		0	0	5.91868	Male	Private residence/accommodation	H62A	Saturday	Y	0	0	1	1	1	2	H62	Costing 2014-2015	Dandenong	4100000	8600000	42012.9	42021.6	9	8204.64
3556070	22	4.6	1.72656	1	12	0	0	0	0	0	0	0	0	0	0	0	1		0	0	0.959188	Female	Private residence/accommodation	G67B	Tuesday	N	0	0	1	0	1	2	G67	Costing 2014-2015	Dandenong	745552	8700000	42036.7	42038.4	2	3043.18
3555705	57	4.6	3.78125	1	12	0	0	0	0	0	0	0	0	0	0	0	1		0	0	3.31462	Female	Private residence/accommodation	H63B	Wednesday	N	0	0	1	0	1	2	H63	Costing 2014-2015	Dandenong	236204	8700000	42035.9	42039.7	4	3604.48
3540705	60	4.6	2.52734	0	12	0	0	0	0	0	0	0	0	0	0	0	1		0	0	3.7456	Female	Private residence/accommodation	G47B	Sunday	N	0	0	1	0	1	2	G47	Costing 2014-2015	Dandenong	4000000	8600000	42013	42015.5	2	3888.91
3544494	44	4.6	5.13672	0	12	0	0	0	0	0	0	0	0	0	0	0	1		0	0	5.16667	Male	Private residence/accommodation	G04C	Tuesday	Y	0	0	1	0	1	2	G04	Costing 2014-2015	Dandenong	2100000	8600000	42019.3	42024.4	5	14161.8
3537218	39	4.6	5.94531	1	12	0	0	0	0	0	0	0	0	0	0	0	1		0	0	5.68731	Male	Private residence/accommodation	H43A	Friday	N	0	0	1	1	1	2	H43	Costing 2014-2015	Dandenong	7200000	8600000	42007.8	42013.7	6	7096.34
3542123	82	4.6	4.89063	0	12	0	0	0	0	0	0	0	0	0	0	0	1		0	0	5.78241	Female	Private residence/accommodation	G70A	Friday	Y	0	0	1	1	1	2	G70	Costing 2014-2015	Dandenong	4200000	8600000	42015.8	42020.7	5	6104.94
3537682	59	4.6	3.8125	0	12	0	0	0	0	0	0	0	0	1	0	0	1		0	0	4.17105	Male	Private residence/accommodation	Z61A	Thursday	Y	0	0	1	1	1	2	Z61	Costing 2014-2015	Dandenong	7700000	8600000	42009	42012.8	3	4000.63
3545553	32	4.6	13.9766	1	12	0	0	0	0	0	0	0	0	0	0	0	1		0	0	2.73432	Male	Private residence/accommodation	H62B	Friday	Y	0	0	1	0	1	2	H62	Costing 2014-2015	Dandenong	2500000	8600000	42020.6	42034.6	14	14878.7
3558220	50	4.6	1.73828	0	12	0	0	0	0	0	0	0	0	0	0	0	1		0	0	1.75	Female	Private residence/accommodation	G66A	Friday	N	0	0	1	1	1	2	G66	Costing 2014-2015	Dandenong	7900000	8700000	42039.7	42041.5	2	2919.8
3545986	38	4.6	1.81641	0	12	0	0	0	0	0	0	0	0	0	0	0	1		0	0	1.83333	Male	Private residence/accommodation	I74B	Sunday	N	0	0	1	0	1	2	I74	Costing 2014-2015	Dandenong	7700000	8600000	42020.9	42022.8	2	2680.94
3558508	79	4.6	5.32422	0	12	0	0	0	0	0	0	0	0	1	0	0	1		0	0	14.991	Male	Private residence/accommodation	G02A	Tuesday	Y	0	0	1	1	1	2	G02	Costing 2014-2015	Dandenong	4300000	8700000	42040.1	42045.5	5	23722.4
3556747	73	4.6	1.24609	0	12	0	0	0	0	0	0	0	0	0	0	0	1		0	0	4.10137	Male	Private residence/accommodation	H60B	Tuesday	N	0	0	1	0	1	2	H60	Costing 2014-2015	Dandenong	2400000	8700000	42037.4	42038.6	1	1719.36
3554500	70	4.6	5.14063	1	12	0	0	0	0	0	0	0	0	0	0	0	1		0	0	5.125	Male	Private residence/accommodation	G01B	Wednesday	Y	0	0	1	0	1	2	G01	Costing 2014-2015	Dandenong	7800000	8700000	42034.3	42039.4	5	12520.1
3554269	49	4.6	4.36719	0	12	0	0	0	0	0	0	0	0	0	0	0	1		0	0	4.375	Female	Private residence/accommodation	G01A	Monday	Y	0	0	1	1	1	2	G01	Costing 2014-2015	Dandenong	2500000	8700000	42033.3	42037.7	4	15626.5
3556189	66	4.6	37.875	1	12	0	0	0	0	0	0	1	1	0	0	0	1		29.0979	41901	16.5271	Male	Private residence/accommodation	G01A	Thursday	Y	1	0	1	1	1	2	G01	Costing 2014-2015	Dandenong	7900000	8700000	42037.8	42075.7	20	21450.3
3559276	50	4.6	5.26953	1	12	0	0	0	0	0	0	0	0	0	0	0	1		0	0	5.25	Male	Private residence/accommodation	G05A	Wednesday	N	0	0	1	1	1	2	G05	Costing 2014-2015	Dandenong	4300000	8700000	42041.3	42046.6	5	8672.37
3548384	53	4.6	1.55469	0	12	0	0	0	0	0	0	0	0	1	0	0	1		0	0	4.69409	Male	Private residence/accommodation	H60B	Thursday	Y	0	0	1	0	1	2	H60	Costing 2014-2015	Dandenong	2200000	8600000	42025	42026.6	1	2077.05
3558493	59	4.6	0.878906	1	12	0	0	0	0	0	0	0	0	0	0	0	1		0	0	0.288695	Male	Private residence/accommodation	X02B	Thursday	N	0	0	1	0	1	2	X02	Costing 2014-2015	Dandenong	2100000	8700000	42040	42040.9	1	2286.06
3555445	52	4.6	4.70313	1	12	0	0	0	0	0	0	0	0	0	0	0	1		0	0	4.66667	Female	Private residence/accommodation	G66A	Wednesday	N	0	0	1	1	1	2	G66	Costing 2014-2015	Dandenong	4500000	8700000	42034.8	42039.5	5	4332.41
3540597	44	4.6	7.95703	1	12	0	0	0	0	0	0	0	0	1	0	0	1		0	0	6.61414	Female	Private residence/accommodation	H63A	Friday	Y	0	0	1	1	1	2	H63	Costing 2014-2015	Dandenong	4000000	8600000	42012.9	42020.8	8	7774.45
3549507	65	4.6	81.2031	1	12	0	0	0	0	0	0	0	0	0	0	0	1		10.9368	15749	17.2875	Male	Private residence/accommodation	G01A	Monday	Y	0	0	1	1	1	2	G01
3538314	94	4.6	1.04297	0	12	0	0	0	0	0	0	0	0	0	0	0	1		0	0	2.40883	Female	Private residence/accommodation	G70B	Tuesday	N	0	0	1	0	1	2	G70	Costing 2014-2015	Dandenong	2300000	8600000	42009.6	42010.7	1	930.797
3559201	56	4.6	5.92188	1	12	0	0	0	0	0	0	0	0	0	0	0	1		0	0	5.91667	Male	Other acute hosp/ext care/rehab/geri ctr	H62B	Wednesday	N	0	0	1	0	1	2	H62	Costing 2014-2015	Dandenong	805747	8700000	42040.6	42046.5	6	5676.61
3543667	80	4.6	2.88672	1	12	0	0	0	0	0	0	0	0	0	0	0	1		0	0	2.875	Female	Private residence/accommodation	K40B	Friday	N	0	0	1	0	1	2	K40	Costing 2014-2015	Dandenong	189148	8600000	42017.6	42020.5	3	3534.25
3543533	59	4.6	13.832	1	12	0	0	0	0	0	0	0	0	0	0	0	1		0	0	4.78653	Male	Private residence/accommodation	G70A	Tuesday	N	0	0	1	1	1	2	G70	Costing 2014-2015	Dandenong	7700000	8600000	42017.8	42031.6	14	11801.5
3543073	23	4.6	5.38672	1	12	0	0	0	0	0	0	0	0	1	0	0	1		4.07014	5861	1.30486	Female	Private residence/accommodation	J64B	Sunday	N	0	0	1	0	1	2	J64	Costing 2014-2015	Dandenong	7100000	8600000	42017.3	42022.7	5	5665.42
3546364	63	4.6	2.96875	1	12	0	0	0	0	0	0	0	0	0	0	0	1		0	0	2.96172	Male	Private residence/accommodation	H62B	Tuesday	N	0	0	1	0	1	2	H62	Costing 2014-2015	Dandenong	7500000	8600000	42021.6	42024.5	3	2787.87
3537607	29	4.6	2.65234	1	12	0	0	0	0	0	0	0	0	0	0	0	1		0	0	1.44403	Male	Private residence/accommodation	X62B	Wednesday	N	0	0	1	0	1	2	X62	Costing 2014-2015	Dandenong	7900000	8600000	42008.8	42011.5	3	3169.46
3546947	79	4.6	1.83203	0	12	0	0	0	0	0	0	0	0	0	0	0	1		0	0	1.83333	Female	Private residence/accommodation	G10B	Tuesday	N	0	0	1	0	1	2	G10	Costing 2014-2015	Dandenong	819438	8600000	42022.9	42024.8	2	5125.14
3548435	66	4.6	8.33984	1	12	0	0	0	0	0	0	0	0	0	0	0	1		0	0	6.69654	Male	Private residence/accommodation	H63A	Thursday	Y	0	0	1	1	1	2	H63	Costing 2014-2015	Dandenong	4600000	8600000	42025.2	42033.5	8	8792.99
3540664	56	4.6	6.64453	1	12	0	0	0	0	0	0	0	0	0	0	0	1		0	0	1.95924	Female	Private residence/accommodation	H64B	Thursday	N	0	0	1	0	1	2	H64	Costing 2014-2015	Dandenong	2100000	8600000	42013	42019.6	7	6002.52
3546789	64	4.6	3.01172	1	12	0	0	0	0	0	0	0	0	0	0	0	1		0	0	1.75569	Male	Private residence/accommodation	G47B	Wednesday	N	0	0	1	0	1	2	G47	Costing 2014-2015	Dandenong	2200000	8600000	42022.7	42025.7	3	3276.91
3551456	20	4.6	2.33203	0	12	0	0	0	0	0	0	0	0	0	0	0	1		0	0	2.64639	Female	Private residence/accommodation	G07A	Tuesday	N	0	0	1	1	1	2	G07	Costing 2014-2015	Dandenong	7900000	8700000	42029.5	42031.8	2	4518.37
3559348	49	4.6	5.32813	1	12	0	0	0	0	0	0	0	0	1	0	0	1		0	0	5.29167	Female	Private residence/accommodation	G66A	Wednesday	N	0	0	1	1	1	2	G66	Costing 2014-2015	Dandenong	815860	8700000	42041.3	42046.6	5	4468.91
3551998	40	4.6	2.92969	0	12	0	0	0	1	0	0	0	1	0	0	0	1		0	0	5.83225	Female	Private residence/accommodation	H62A	Thursday	Y	1	0	1	1	1	2	H62	Costing 2014-2015	Dandenong	4000000	8700000	42030.8	42033.7	3	3151.84
3558262	68	4.6	6.66797	0	12	0	0	0	0	0	0	0	0	0	0	0	1		0	0	6.83375	Female	Private residence/accommodation	H60A	Wednesday	Y	0	0	1	1	1	2	H60	Costing 2014-2015	Dandenong	852381	8700000	42039.9	42046.6	7	7092.24
3543768	87	4.6	0.742188	0	12	0	0	0	0	0	0	0	0	0	0	0	1		0	0	0.75	Female	Private residence/accommodation	G70C	Wednesday	N	0	0	1	0	1	2	G70	Costing 2014-2015	Dandenong	4000000	8600000	42018	42018.8	1	1057.7
3550744	24	4.6	0.734375	0	12	0	0	0	0	0	0	0	0	0	0	0	1		0	0	0.875916	Female	Private residence/accommodation	X60B	Saturday	N	0	0	1	0	1	2	X60	Costing 2014-2015	Dandenong	7900000	8600000	42027.9	42028.6	1	1944.37
3554225	64	4.6	5.96484	1	12	0	0	0	0	0	0	0	0	0	0	0	1		0	0	4.78653	Female	Private residence/accommodation	G70A	Wednesday	Y	0	0	1	1	1	2	G70	Costing 2014-2015	Dandenong	2000000	8700000	42033.8	42039.8	6	5493.81
3556083	53	4.6	2.94141	0	12	0	0	0	0	0	0	0	0	0	0	0	1		0	0	4.78653	Male	Private residence/accommodation	G70A	Wednesday	Y	0	0	1	1	1	2	G70	Costing 2014-2015	Dandenong	2200000	8700000	42036.8	42039.7	3	3208.97
3558289	48	4.6	1.83594	0	12	0	0	0	1	0	0	0	1	1	0	0	1		0	0	6.99249	Female	Left against Medical Advice	H62A	Friday	N	1	0	1	1	1	2	H62	Costing 2014-2015	Dandenong	2000000	8700000	42039.9	42041.8	2	2430.59
3558621	85	4.6	32.1758	1	12	0	0	0	0	0	0	0	0	0	0	0	1		0	0	32.1667	Male	Private residence/accommodation	G01A	Monday	Y	0	0	1	1	1	2	G01	Costing 2014-2015	Dandenong	2000000	8700000	42040.3	42072.5	32	65539.8
3556870	92	4.6	7.6875	0	12	0	0	0	0	0	0	0	0	0	0	0	1		0	0	10.7153	Female	Aged care residential facility	I69A	Tuesday	Y	0	0	1	1	1	2	I69	Costing 2014-2015	Dandenong	7400000	8700000	42037.8	42045.5	8	7782.16
3559958	82	4.6	4.875	1	12	0	0	0	0	0	0	0	0	0	0	0	1		0	0	3.42482	Female	Private residence/accommodation	G61A	Wednesday	N	0	0	1	1	1	2	G61	Costing 2014-2015	Dandenong	2200000	8700000	42041.8	42046.6	5	5357.19
3553966	48	4.6	2.39063	1	12	0	0	0	0	0	0	0	0	1	0	0	1		0	0	2.375	Male	Private residence/accommodation	H08A	Saturday	N	0	0	1	1	1	2	H08	Costing 2014-2015	Dandenong	7600000	8700000	42033.5	42035.9	2	6793.62
3541773	40	4.6	3.52734	1	12	0	0	0	0	0	0	0	0	0	0	0	1		0	0	1.54364	Male	Private residence/accommodation	J64B	Wednesday	N	0	0	1	0	1	2	J64	Costing 2014-2015	Dandenong	4100000	8600000	42014.8	42018.4	4	5203.79
3552748	66	4.6	4.80078	0	12	0	0	0	0	0	0	0	0	0	0	0	1		0	0	5.51725	Female	Private residence/accommodation	X63A	Sunday	N	0	0	1	1	1	2	X63	Costing 2014-2015	Dandenong	2500000	8700000	42031.9	42036.7	5	4531.27
3552630	42	4.6	5.12109	0	12	0	0	0	0	0	0	0	0	0	0	0	1		0	0	5.125	Male	Other acute hosp/ext care/rehab/geri ctr	H61B	Sunday	Y	0	0	1	0	1	2	H61	Costing 2014-2015	Dandenong	7900000	8700000	42031.6	42036.8	5	5234.03
3548985	32	4.6	1.89063	1	12	0	0	0	0	0	0	0	0	1	0	0	1		0	0	1.63001	Male	Private residence/accommodation	G11Z	Friday	N	0	0	1	0	1	2	G11	Costing 2014-2015	Dandenong	7600000	8600000	42025.9	42027.8	2	3078.69
3553236	66	4.6	3.21094	0	12	0	0	0	0	0	0	0	0	0	0	0	1		0	0	3.25	Male	Private residence/accommodation	G01B	Saturday	Y	0	0	1	0	1	2	G01	Costing 2014-2015	Dandenong	4200000	8700000	42032.5	42035.7	3	16456.1
3540656	68	4.6	6.69531	1	12	0	0	0	0	0	0	0	0	0	0	0	1		0	0	6.57217	Female	Other acute hosp/ext care/rehab/geri ctr	G65A	Thursday	Y	0	0	1	1	1	2	G65	Costing 2014-2015	Dandenong	864379	8600000	42012.9	42019.6	7	7052.8
3556009	20	4.6	1	0	12	0	0	0	0	0	0	0	0	0	0	0	1		0	0	1	Female	Other acute hosp/ext care/rehab/geri ctr	G47B	Monday	N	0	0	1	0	1	2	G47	Costing 2014-2015	Dandenong	7000000	8700000	42036.8	42037.8	1	2144.15
3556977	35	4.6	1.5	0	12	0	0	0	0	0	0	0	0	0	0	0	1		0	0	1.5	Female	Private residence/accommodation	G66A	Wednesday	N	0	0	1	1	1	2	G66	Costing 2014-2015	Dandenong	4600000	8700000	42038.1	42039.6	1	2814.3
3545147	53	4.6	9.90625	0	12	0	0	0	0	0	0	0	0	0	0	0	1		0	0	9.91667	Male	Private residence/accommodation	G04A	Sunday	Y	0	0	1	1	1	2	G04	Costing 2014-2015	Dandenong	7600000	8600000	42019.6	42029.5	10	13853.1
3536875	61	4.6	9.3125	1	12	0	0	0	0	0	0	0	0	0	0	0	1		0	0	8.27539	Male	Private residence/accommodation	H62A	Monday	Y	0	0	1	1	1	2	H62	Costing 2014-2015	Dandenong	238888	8600000	42007.3	42016.6	9	9132.38
3541152	69	4.6	2.75391	1	12	0	0	0	0	0	0	0	0	0	0	0	1		0	0	2.75	Male	Private residence/accommodation	E62A	Monday	Y	0	0	1	1	1	2	E62	Costing 2014-2015	Dandenong	7900000	8600000	42013.7	42016.4	3	3434.75
3557459	70	4.6	6.89844	1	12	0	0	0	0	0	0	0	0	1	0	0	1		0	0	4.90384	Male	Private residence/accommodation	K62A	Tuesday	Y	0	0	1	1	1	2	K62	Costing 2014-2015	Dandenong	2500000	8700000	42038.8	42045.7	7	6265.27
3557357	43	4.6	1.08984	1	12	0	0	0	0	0	0	0	0	0	0	0	1		0	0	1.08333	Female	Private residence/accommodation	Z64A	Wednesday	N	0	0	1	1	1	2	Z64	Costing 2014-2015	Dandenong	471404	8700000	42038.6	42039.7	1	2296.98
3538381	46	4.6	3.57813	1	12	0	0	0	0	0	0	0	0	0	0	0	1		0	0	2.23947	Male	Private residence/accommodation	G70B	Friday	Y	0	0	1	0	1	2	G70	Costing 2014-2015	Dandenong	7300000	8600000	42009.9	42013.5	4	4465.56
3544211	86	4.6	19.5781	0	12	0	0	0	0	0	0	0	0	0	0	0	1		0	0	19.5833	Male	Statistical Separation	G65A	Thursday	Y	0	0	1	1	1	2	G65	Costing 2014-2015	Dandenong	4500000	8600000	42021	42040.5	20	22193.4
3551970	74	4.6	1.79688	1	12	0	0	0	0	0	0	0	0	0	0	0	1		0	0	1.79167	Female	Private residence/accommodation	G70A	Wednesday	N	0	0	1	1	1	2	G70	Costing 2014-2015	Dandenong	4500000	8700000	42030.6	42032.4	2	2049.07
3540577	82	4.6	12.9258	1	12	0	0	0	0	0	0	1	1	0	0	0	1		0	0	12.9167	Male	Private residence/accommodation	G01A	Wednesday	Y	1	0	1	1	1	2	G01	Costing 2014-2015	Dandenong	7900000	8600000	42012.5	42025.5	13	27527
3537670	69	4.6	14.4492	0	12	0	0	0	0	1	0	0	1	0	0	0	1		0	0	14.4583	Female	Other acute hosp/ext care/rehab/geri ctr	G02A	Monday	Y	1	0	1	1	1	2	G02	Costing 2014-2015	Dandenong	2200000	8600000	42009.1	42023.5	14	19190.8
3539833	25	4.6	0.800781	0	12	0	0	0	0	0	0	0	0	0	0	0	1		0	0	3.83982	Female	Private residence/accommodation	G65A	Thursday	N	0	0	1	1	1	2	G65	Costing 2014-2015	Dandenong	429956	8600000	42011.7	42012.5	1	835.635
3546854	66	4.6	6.48438	0	12	0	0	0	0	0	0	0	0	1	0	0	1		3.14236	4525	3.31597	Male	Private residence/accommodation	G02B	Sunday	N	0	0	1	0	1	2	G02	Costing 2014-2015	Dandenong	7600000	8600000	42023.3	42029.8	6	12245
3559618	91	4.6	5.16797	1	12	0	0	0	0	0	0	0	0	0	0	0	1		0	0	5.16667	Female	Private residence/accommodation	G61B	Wednesday	Y	0	0	1	0	1	2	G61	Costing 2014-2015	Dandenong	344321	8700000	42041.5	42046.7	5	4296.24
3542768	78	4.6	14.8555	0	12	0	0	0	1	0	0	0	1	0	0	0	1		0	0	26.6834	Female	Other acute hosp/ext care/rehab/geri ctr	G02A	Tuesday	Y	1	0	1	1	1	2	G02	Costing 2014-2015	Dandenong	4200000	8600000	42016.8	42031.6	15	24343
3552157	71	4.6	4.77734	1	12	0	0	0	0	0	0	0	0	1	0	0	1		0	0	3.85623	Female	Private residence/accommodation	G46B	Saturday	N	0	0	1	0	1	2	G46	Costing 2014-2015	Dandenong	4600000	8700000	42031	42035.8	4	8098.15
3560077	46	4.6	3.65234	1	12	0	0	0	0	0	0	0	0	1	0	0	1		0	0	2.91185	Male	Private residence/accommodation	H62B	Tuesday	N	0	0	1	0	1	2	H62	Costing 2014-2015	Dandenong	4500000	8700000	42041.9	42045.5	4	2848.25
3559043	60	4.6	4.63672	1	12	0	0	0	2	0	0	0	2	1	0	0	1		0	0	4.625	Female	Private residence/accommodation	F74A	Tuesday	Y	1	0	1	1	1	2	F74	Costing 2014-2015	Dandenong	473730	8700000	42040.8	42045.5	5	5569.25
3545904	73	4.6	10.793	1	12	0	0	0	0	0	0	1	1	0	0	0	1		0	0	10.7917	Female	Statistical Separation	G01A	Tuesday	Y	1	0	1	1	1	2	G01	Costing 2014-2015	Dandenong	4000000	8600000	42020.7	42031.5	11	28551
3537154	53	4.6	2.99219	0	12	0	0	0	0	0	0	0	0	1	0	0	1		0	0	4.17105	Male	Private residence/accommodation	Z61A	Tuesday	N	0	0	1	1	1	2	Z61	Costing 2014-2015	Dandenong	2200000	8600000	42007.7	42010.7	3	3191.69
3552114	73	4.6	5.33203	0	12	0	0	0	0	0	0	0	0	0	0	0	1		0	0	5.33333	Female	Private residence/accommodation	G02B	Sunday	Y	0	0	1	0	1	2	G02	Costing 2014-2015	Dandenong	2200000	8700000	42031.3	42036.6	5	18167.1
3541618	31	4.6	9.27734	1	12	0	0	0	0	0	0	0	0	0	0	0	1		0	0	7.22816	Female	Private residence/accommodation	G48A	Monday	N	0	0	1	1	1	2	G48	Costing 2014-2015	Dandenong	2200000	8600000	42014.5	42023.8	9	8616.49
3543004	26	4.6	0.308594	0	12	0	0	0	0	0	0	0	0	0	0	0	1		0	0	0.330711	Male	Private residence/accommodation	X60B	Tuesday	N	0	0	1	0	1	2	X60	Costing 2014-2015	Dandenong	2500000	8600000	42017.2	42017.6	1	609.645
3549906	86	4.6	4.02734	0	12	0	0	0	0	0	0	0	0	0	0	0	1		0	0	4.04167	Female	Private residence/accommodation	G61A	Monday	Y	0	0	1	1	1	2	G61	Costing 2014-2015	Dandenong	4700000	8600000	42026.6	42030.7	4	3855.8
3545008	77	4.6	4.78516	1	12	0	0	0	0	0	0	0	0	0	0	0	1		0	0	3.18322	Female	Private residence/accommodation	G61A	Tuesday	N	0	0	1	1	1	2	G61	Costing 2014-2015	Dandenong	4100000	8600000	42019.7	42024.5	5	5169.98
3557899	85	4.6	9.20703	0	12	0	0	0	0	0	0	0	0	1	0	0	1		0	0	9.20833	Male	Private residence/accommodation	G01A	Friday	Y	0	0	1	1	1	2	G01	Costing 2014-2015	Dandenong	4500000	8700000	42039.4	42048.7	9	22333.3
3556890	49	4.6	4.26953	0	12	0	0	0	0	0	0	0	0	0	0	0	1		0	0	4.29167	Male	Private residence/accommodation	G05C	Saturday	N	0	0	1	0	1	2	G05	Costing 2014-2015	Dandenong	7800000	8700000	42038.3	42042.6	4	6020.5
3538320	77	4.6	14.0547	0	12	0	0	0	0	0	1	0	1	0	0	0	1		0	0	26.6834	Male	Other acute hosp/ext care/rehab/geri ctr	G02A	Monday	Y	1	0	1	1	1	2	G02	Costing 2014-2015	Dandenong	4200000	8600000	42009.7	42023.7	14	34325.5
3561673	33	4.74	1.48828	1	13	0	0	0	0	0	0	0	0	0	0	0	1		0	0	1.43218	Female	Other acute hosp/ext care/rehab/geri ctr	H64B	Wednesday	N	0	0	1	0	1	2	H64	Costing 2014-2015	Dandenong	4000000	8700000	42045	42046.5	1	2157.33
3572470	36	4.74	1.05469	1	13	0	0	0	0	0	0	0	0	0	0	0	1		0	0	1.04167	Female	Private residence/accommodation	H08A	Thursday	N	0	0	1	1	1	2	H08	Costing 2014-2015	Dandenong	7200000	8700000	42060.5	42061.5	1	4485.33
3563968	60	4.74	3.89063	0	13	0	0	0	0	0	0	0	0	1	0	0	1		0	0	4.19782	Female	Private residence/accommodation	G65A	Monday	N	0	0	1	1	1	2	G65	Costing 2014-2015	Dandenong	4000000	8700000	42047.8	42051.7	4	4541.23
3579072	52	4.74	5.03516	0	13	0	0	0	0	0	0	0	0	0	0	0	1		0	0	8.43799	Male	Private residence/accommodation	G48A	Wednesday	N	0	0	1	1	1	2	G48	Costing 2014-2015	Dandenong	4600000	8700000	42069.4	42074.5	5	6481.9
3564480	46	4.74	0.941406	0	13	0	0	0	0	0	0	0	0	0	0	0	1		0	0	1.24435	Female	Private residence/accommodation	X02B	Saturday	N	0	0	1	0	1	2	X02	Costing 2014-2015	Dandenong	2400000	8700000	42048.7	42049.6	1	2113.98
3568645	75	4.74	4.15625	1	13	0	0	0	0	0	0	0	0	0	0	0	1		0	0	4.125	Male	Private residence/accommodation	G02B	Monday	Y	0	0	1	0	1	2	G02	Costing 2014-2015	Dandenong	2000000	8700000	42054.3	42058.5	4	8444.17
3566248	49	4.74	10.75	1	13	0	0	0	0	0	0	0	0	0	0	0	1		0	0	5.92188	Male	Private residence/accommodation	L67A	Friday	Y	0	0	1	1	1	2	L67	Costing 2014-2015	Dandenong	2100000	8700000	42051.7	42062.4	11	10366.5
3566587	39	4.74	2.24219	0	13	0	0	0	0	0	0	0	0	0	0	0	1		0	0	2.25	Male	Private residence/accommodation	B07B	Thursday	N	0	0	1	0	1	2	B07	Costing 2014-2015	Dandenong	4100000	8700000	42052.3	42054.5	2	7424.17
3576431	43	4.74	4.41016	0	13	0	0	0	0	0	0	0	0	0	0	0	1		0	0	12.4472	Male	Private residence/accommodation	G03A	Saturday	Y	0	0	1	1	1	2	G03	Costing 2014-2015	Dandenong	7900000	8700000	42066.3	42070.7	4	8471.63
3566461	63	4.74	0.019531	0	13	0	0	0	0	0	0	0	0	0	0	0	1		0	0	0.041667	Female	Private residence/accommodation	Z63B	Saturday	N	0	0	1	0	1	2	Z63	Costing 2014-2015	Dandenong	4200000	8700000	42049.8	42049.8	1	271.355
3565223	89	4.74	4.94141	0	13	0	0	0	0	0	0	0	0	0	0	0	1		0	0	4.95833	Male	Private residence/accommodation	G61A	Thursday	N	0	0	1	1	1	2	G61	Costing 2014-2015	Dandenong	7900000	8700000	42049.7	42054.7	5	5028.61
3568301	55	4.74	3.16797	1	13	0	0	0	0	0	0	0	0	0	0	0	1		0	0	2.12689	Male	Private residence/accommodation	G70B	Sunday	N	0	0	1	0	1	2	G70	Costing 2014-2015	Dandenong	4300000	8700000	42054.4	42057.6	3	4251.75
3575967	77	4.74	7.75781	1	13	0	0	0	0	0	0	0	0	0	0	0	1		0	0	7.75	Male	Private residence/accommodation	G61A	Monday	Y	0	0	1	1	1	2	G61	Costing 2014-2015	Dandenong	718084	8700000	42064.9	42072.7	8	18317.9
3562076	19	4.74	1.76953	1	13	0	0	0	0	0	0	0	0	1	0	0	1		0	0	1.75	Female	Private residence/accommodation	G11Z	Thursday	Y	0	0	1	0	1	2	G11	Costing 2014-2015	Dandenong	4500000	8700000	42045.6	42047.4	2	5202.05
3566197	63	4.74	10.6172	0	13	0	0	0	0	0	0	1	1	0	0	0	1		0	0	15.3274	Male	Private residence/accommodation	G02A	Friday	Y	1	0	1	1	1	2	G02	Costing 2014-2015	Dandenong	7200000	8700000	42051.9	42062.5	11	26262.3
3572068	71	4.74	5.78125	0	13	0	0	0	0	0	0	0	0	0	0	0	1		0	0	5.96033	Male	Private residence/accommodation	H64A	Monday	N	0	0	1	1	1	2	H64	Costing 2014-2015	Dandenong	825835	8700000	42059.8	42065.6	6	6287.3
3560879	76	4.74	16.2695	1	13	0	0	0	0	0	0	0	0	0	0	0	1		0	0	16.25	Female	Statistical Separation	G01A	Wednesday	Y	0	0	1	1	1	2	G01	Costing 2014-2015	Dandenong	2500000	8700000	42044.3	42060.6	16	28497.1
3572536	77	4.74	6.81641	1	13	0	0	0	0	0	0	0	0	0	0	0	1		0	0	4.70458	Female	Private residence/accommodation	G70B	Wednesday	N	0	0	1	0	1	2	G70	Costing 2014-2015	Dandenong	4100000	8700000	42060.8	42067.6	7	6167.28
3575999	66	4.74	14.7344	1	13	0	0	0	0	0	0	0	0	1	0	0	1		0	0	8.26251	Male	Private residence/accommodation	G48A	Tuesday	Y	0	0	1	1	1	2	G48	Costing 2014-2015	Dandenong	2000000	8700000	42065.7	42080.5	15	16731.8
3570528	21	4.74	4.56641	1	13	0	0	0	0	0	0	0	0	0	0	0	1		0	0	4.54167	Female	Private residence/accommodation	G02A	Friday	Y	0	0	1	1	1	2	G02	Costing 2014-2015	Dandenong	4700000	8700000	42058.3	42062.9	4	15035.3
3577943	79	4.74	7.20703	0	13	0	0	0	0	0	0	0	0	0	0	0	1		0	0	7.20833	Female	Private residence/accommodation	G02A	Thursday	Y	0	0	1	1	1	2	G02	Costing 2014-2015	Dandenong	7900000	8700000	42068.3	42075.5	7	15931
3570253	82	4.74	2.80859	0	13	0	0	0	0	0	0	0	0	0	0	0	1		0	0	2.92181	Female	Private residence/accommodation	G47B	Tuesday	N	0	0	1	0	1	2	G47	Costing 2014-2015	Dandenong	4100000	8700000	42056.8	42059.6	3	3185.16
3571543	79	4.74	1.17578	1	13	0	0	0	0	0	0	0	0	0	0	0	1		0	0	1.16667	Male	Private residence/accommodation	G10B	Wednesday	N	0	0	1	0	1	2	G10	Costing 2014-2015	Dandenong	4200000	8700000	42059.3	42060.5	1	5268.89
3564906	59	4.74	1.20703	1	13	0	0	0	0	0	0	0	0	0	0	0	1		0	0	1.09029	Female	Private residence/accommodation	X60B	Sunday	N	0	0	1	0	1	2	X60	Costing 2014-2015	Dandenong	4200000	8700000	42049.3	42050.5	1	1543.82
3563020	21	4.74	12.582	1	13	0	0	0	0	0	0	0	0	0	0	0	1		0	0	7.02095	Female	Private residence/accommodation	G47A	Tuesday	Y	0	0	1	1	1	2	G47	Costing 2014-2015	Dandenong	4400000	8700000	42046.9	42059.4	13	13085.6
3577513	64	4.74	0.28125	0	13	0	0	0	0	0	0	0	0	1	0	0	1		0	0	0.321998	Female	Left against Medical Advice	Z61B	Wednesday	N	0	0	1	0	1	2	Z61	Costing 2014-2015	Dandenong	2000000	8700000	42067.5	42067.8	1	515.921
3576887	43	4.74	0.839844	1	13	0	0	0	0	0	0	0	0	0	0	0	1		0	0	0.833333	Male	Private residence/accommodation	G66A	Wednesday	N	0	0	1	1	1	2	G66	Costing 2014-2015	Dandenong	4200000	8700000	42066.8	42067.6	1	732.855
3562380	62	4.74	3.08984	1	13	0	0	0	0	0	0	0	0	0	0	0	1		0	0	3.08333	Female	Private residence/accommodation	G48B	Friday	N	0	0	1	0	1	2	G48	Costing 2014-2015	Dandenong	410461	8700000	42045.6	42048.7	3	5312.17
3568583	45	4.74	0.179688	1	13	0	0	0	0	0	0	0	0	0	0	0	1		0	0	0.166667	Female	Private residence/accommodation	H62B	Thursday	N	0	0	1	0	1	2	H62	Costing 2014-2015	Dandenong	2200000	8700000	42054.6	42054.8	1	233.204
3563119	58	4.74	14.0469	1	13	1	0	0	1	0	0	0	2	0	0	0	1		0	0	9.58521	Male	Death	H60A	Wednesday	Y	1	0	1	1	1	2	H60	Costing 2014-2015	Dandenong	2300000	8700000	42046.3	42060.4	14	23449.6
3571437	31	4.74	1.49609	0	13	0	0	0	0	0	0	0	0	0	0	0	1		0	0	2.08687	Male	Left against Medical Advice	G70B	Wednesday	N	0	0	1	0	1	2	G70	Costing 2014-2015	Dandenong	2200000	8700000	42059	42060.5	2	2077.17
3572953	58	4.74	1.51563	0	13	0	0	0	0	0	0	0	0	0	0	0	1		0	0	1.84095	Male	Private residence/accommodation	G61B	Friday	N	0	0	1	0	1	2	G61	Costing 2014-2015	Dandenong	7900000	8700000	42061.2	42062.7	1	1329.26
3574553	85	4.74	6.59375	0	13	0	0	0	0	0	0	0	0	0	0	0	1		0	0	7.41472	Male	Private residence/accommodation	G47A	Friday	Y	0	0	1	1	1	2	G47	Costing 2014-2015	Dandenong	2100000	8700000	42063	42069.6	7	6155.04
3571563	48	4.74	1.22266	1	13	0	0	0	0	0	0	0	0	0	0	0	1		0	0	1.20833	Male	Private residence/accommodation	H43B	Wednesday	N	0	0	1	0	1	2	H43	Costing 2014-2015	Dandenong	7600000	8700000	42059.3	42060.6	1	2677.78
3575523	45	4.74	2.66016	1	13	0	0	0	0	0	0	0	0	0	0	0	1		0	0	2.56961	Female	Private residence/accommodation	G67B	Wednesday	Y	0	0	1	0	1	2	G67	Costing 2014-2015	Dandenong	2300000	8700000	42065	42067.6	3	2514.05
3566819	64	4.74	10.293	1	13	0	0	0	3	0	0	0	3	0	0	0	1		0	0	10.2917	Male	Private residence/accommodation	G02A	Friday	Y	1	0	1	1	1	2	G02	Costing 2014-2015	Dandenong	7900000	8700000	42052.5	42062.8	10	17653.2
3576216	81	4.74	1.30469	1	13	0	0	0	0	0	0	0	0	0	0	0	1		0	0	1.29167	Male	Private residence/accommodation	G10A	Wednesday	N	0	0	1	1	1	2	G10	Costing 2014-2015	Dandenong	2300000	8700000	42066.3	42067.6	1	5864.33
3574469	60	4.74	1.59375	0	13	0	0	0	0	0	0	0	0	1	0	0	1		0	0	4.17105	Male	Private residence/accommodation	Z61A	Sunday	N	0	0	1	1	1	2	Z61	Costing 2014-2015	Dandenong	2300000	8700000	42062.8	42064.4	2	1522.1
3574538	63	4.74	5.78516	0	13	0	0	0	0	0	0	0	0	0	0	0	1		0	0	14.9334	Male	Other acute hosp/ext care/rehab/geri ctr	H60A	Thursday	Y	0	0	1	1	1	2	H60	Costing 2014-2015	Dandenong	2300000	8700000	42062.8	42068.6	6	6048.99
3574533	84	4.74	2.83984	0	13	0	0	0	0	0	0	0	0	0	0	0	1		0	0	2.92181	Female	Private residence/accommodation	G47B	Monday	N	0	0	1	0	1	2	G47	Costing 2014-2015	Dandenong	4600000	8700000	42062.8	42065.6	3	2806.36
3568969	29	4.74	1.38281	1	13	0	0	0	1	0	0	0	1	0	0	0	1		0	0	1.375	Female	Private residence/accommodation	G70B	Saturday	N	1	0	1	0	1	2	G70	Costing 2014-2015	Dandenong	7900000	8700000	42055.3	42056.7	1	2323.29
3563528	63	4.74	1.28516	0	13	0	0	0	0	0	0	0	0	0	0	0	1		0	0	1.29167	Male	Private residence/accommodation	X63A	Friday	N	0	0	1	1	1	2	X63	Costing 2014-2015	Dandenong	2300000	8700000	42047.5	42048.7	1	1701.18
3573858	70	4.74	5.14063	0	13	0	0	0	0	0	0	0	0	1	0	0	1		0	0	11.2148	Male	Aged care residential facility	L60A	Wednesday	N	0	0	1	1	1	2	L60	Costing 2014-2015	Dandenong	2500000	8700000	42062.4	42067.5	5	5237.96
3565398	27	4.74	1.875	0	13	0	0	0	0	0	0	0	0	0	0	0	1		0	0	2.28305	Male	Private residence/accommodation	G47B	Monday	N	0	0	1	0	1	2	G47	Costing 2014-2015	Dandenong	7000000	8700000	42049.8	42051.7	2	2018.78
3571483	82	4.74	3.52734	1	13	0	0	0	0	0	0	0	0	0	0	0	1		0	0	3.5	Male	Other acute hosp/ext care/rehab/geri ctr	G61A	Friday	N	0	0	1	1	1	2	G61	Costing 2014-2015	Dandenong	2500000	8700000	42059.1	42062.7	3	7390.54
3565697	58	4.74	7.53906	0	13	0	0	0	0	0	0	0	0	0	0	0	1		3.12569	4501	4.41597	Male	Private residence/accommodation	G02B	Monday	Y	0	0	1	0	1	2	G02	Costing 2014-2015	Dandenong	864415	8700000	42051.3	42058.8	7	13807.2
3578043	49	4.74	2.67188	1	13	0	0	0	0	0	0	0	0	0	0	0	1		0	0	1.81962	Female	Private residence/accommodation	X63B	Saturday	N	0	0	1	0	1	2	X63	Costing 2014-2015	Dandenong	752464	8700000	42068	42070.7	2	3181.94
3560416	38	4.74	1.98047	1	13	0	0	0	0	0	0	0	0	0	0	0	1		0	0	1.57049	Female	Private residence/accommodation	Z61A	Monday	N	0	0	1	1	1	2	Z61	Costing 2014-2015	Dandenong	7900000	8700000	42042.7	42044.7	2	2394.43
3571417	88	4.74	0.742188	0	13	0	0	0	0	0	0	0	0	0	0	0	1		0	0	1.92015	Female	Private residence/accommodation	G70B	Tuesday	N	0	0	1	0	1	2	G70	Costing 2014-2015	Dandenong	2100000	8700000	42058.9	42059.7	1	821.213
3569596	65	4.74	2.70313	0	13	0	0	0	1	1	0	0	2	0	0	0	1		0	0	9.36985	Female	Other acute hosp/ext care/rehab/geri ctr	H62A	Monday	Y	1	0	1	1	1	2	H62	Costing 2014-2015	Dandenong	7900000	8700000	42056	42058.7	3	8140.91
3576012	66	4.74	1.83984	1	13	0	0	0	0	0	0	0	0	0	0	0	1		0	0	1.83333	Female	Private residence/accommodation	X63A	Wednesday	N	0	0	1	1	1	2	X63	Costing 2014-2015	Dandenong	7900000	8700000	42065.8	42067.6	2	1754.15
3571365	51	4.74	0.050781	0	13	0	0	0	0	0	0	0	0	0	0	0	1		0	0	0.232142	Female	Left against Medical Advice	G61B	Monday	N	0	0	1	0	1	2	G61	Costing 2014-2015	Dandenong	496539	8700000	42058.8	42058.8	1	440.788
3564494	83	4.74	4.94141	1	13	0	0	0	0	0	0	0	0	0	0	0	1		0	0	2.33619	Male	Private residence/accommodation	G61B	Wednesday	N	0	0	1	0	1	2	G61	Costing 2014-2015	Dandenong	2300000	8700000	42048.7	42053.6	5	4250.86
3571540	43	4.74	1.12891	1	13	0	0	0	0	0	0	0	0	0	0	0	1		0	0	1.125	Female	Private residence/accommodation	G10A	Wednesday	N	0	0	1	1	1	2	G10	Costing 2014-2015	Dandenong	7700000	8700000	42059.3	42060.4	1	3539.34
3568821	57	4.74	10.8828	0	13	0	0	0	0	0	0	1	1	0	0	0	1		0	0	30.6823	Female	Other acute hosp/ext care/rehab/geri ctr	G02A	Monday	Y	1	0	1	1	1	2	G02	Costing 2014-2015	Dandenong	431971	8700000	42054.9	42065.8	11	29174.4
3570176	30	4.74	2.64453	0	13	0	0	0	0	0	0	0	0	0	0	0	1		0	0	2.66667	Female	Private residence/accommodation	G67A	Tuesday	N	0	0	1	1	1	2	G67	Costing 2014-2015	Dandenong	2500000	8700000	42056.9	42059.6	3	2398.63
3568154	51	4.74	1.60156	0	13	0	0	0	0	0	0	0	0	0	0	0	1		0	0	2.3538	Male	Private residence/accommodation	G11Z	Friday	N	0	0	1	0	1	2	G11	Costing 2014-2015	Dandenong	4500000	8700000	42053.9	42055.6	2	3548.33
3561479	68	4.74	8.82813	1	13	0	0	0	0	0	0	0	0	0	0	0	1		0	0	5.61189	Female	Private residence/accommodation	H08A	Wednesday	N	0	0	1	1	1	2	H08	Costing 2014-2015	Dandenong	4400000	8700000	42044.8	42053.7	9	9864.4
3574541	50	4.74	2.63672	0	13	0	0	0	0	0	0	0	0	0	0	0	1		0	0	6.05212	Female	Private residence/accommodation	H63A	Monday	N	0	0	1	1	1	2	H63	Costing 2014-2015	Dandenong	757568	8700000	42062.9	42065.5	3	2712.95
3570385	85	4.74	18.0117	1	13	0	0	0	0	0	0	1	1	0	0	0	1		0	0	18	Female	Statistical Separation	G01A	Thursday	Y	1	0	1	1	1	2	G01	Costing 2014-2015	Dandenong	7900000	8700000	42057.6	42075.6	18	30793
3567278	57	4.74	6.48438	0	13	0	0	0	0	0	0	0	0	0	0	0	1		0	0	7.34712	Male	Private residence/accommodation	H60A	Tuesday	Y	0	0	1	1	1	2	H60	Costing 2014-2015	Dandenong	7300000	8700000	42053.1	42059.6	6	6003.94
3570566	53	4.74	5.54688	1	13	0	0	0	0	0	0	0	0	0	0	0	1		0	0	3.7456	Male	Private residence/accommodation	G47B	Saturday	Y	0	0	1	0	1	2	G47	Costing 2014-2015	Dandenong	2200000	8700000	42058	42063.6	5	6858.32
3567361	52	4.74	5.19141	1	13	0	0	0	0	0	0	0	0	0	0	0	1		0	0	5.16667	Female	Private residence/accommodation	G01A	Monday	Y	0	0	1	1	1	2	G01	Costing 2014-2015	Dandenong	7900000	8700000	42053.3	42058.5	5	16537.6
3578749	56	4.74	6.69531	0	13	0	0	0	0	0	0	0	0	0	0	0	1		0	0	7.54008	Male	Private residence/accommodation	G46A	Thursday	N	0	0	1	1	1	2	G46	Costing 2014-2015	Dandenong	7800000	8700000	42068.8	42075.5	7	8581.37
3566973	64	4.74	1.0625	1	13	0	0	0	0	0	0	0	0	1	0	0	1		0	0	1.04167	Female	Private residence/accommodation	G46B	Wednesday	N	0	0	1	0	1	2	G46	Costing 2014-2015	Dandenong	7900000	8700000	42052.6	42053.6	1	2993.32
3572279	69	4.74	2.14844	1	13	0	0	0	0	0	0	0	0	0	0	0	1		0	0	2.125	Male	Private residence/accommodation	G11Z	Friday	N	0	0	1	0	1	2	G11	Costing 2014-2015	Dandenong	2300000	8700000	42060.3	42062.4	2	7308.68
3575023	44	4.74	4.68359	1	13	0	0	0	0	0	0	0	0	0	0	0	1		0	0	4.53742	Male	Private residence/accommodation	H64A	Thursday	N	0	0	1	1	1	2	H64	Costing 2014-2015	Dandenong	2200000	8700000	42063.8	42068.5	5	4774.86
3568081	72	4.74	6.41406	1	13	0	0	0	0	0	0	0	0	1	0	0	1		0	0	5.18934	Female	Private residence/accommodation	G70A	Wednesday	Y	0	0	1	1	1	2	G70	Costing 2014-2015	Dandenong	2500000	8700000	42054.2	42060.6	6	7309.49
3572267	58	4.74	41.3828	1	13	0	0	0	0	0	0	0	0	0	0	0	1		39.1021	56307	2.31458	Male	Private residence/accommodation	G11Z	Tuesday	Y	0	0	1	0	1	2	G11
3566821	51	4.74	2.30859	1	13	0	0	0	0	0	0	0	0	0	0	0	1		0	0	2.29167	Female	Private residence/accommodation	G61A	Thursday	N	0	0	1	1	1	2	G61	Costing 2014-2015	Dandenong	496539	8700000	42052.4	42054.7	2	2596.63
3573547	75	4.74	4.71094	0	13	0	0	0	0	0	0	0	0	0	0	0	1		0	0	6.31786	Female	Private residence/accommodation	G67A	Tuesday	N	0	0	1	1	1	2	G67	Costing 2014-2015	Dandenong	4000000	8700000	42061.7	42066.4	5	4096.82
3562962	35	4.74	1.94922	0	13	0	0	0	0	0	0	0	0	0	0	0	1		0	0	4.30032	Female	Private residence/accommodation	H08A	Friday	N	0	0	1	1	1	2	H08	Costing 2014-2015	Dandenong	7800000	8700000	42046.6	42048.6	2	4821.43
3579598	79	4.74	2.02734	0	13	0	0	0	0	0	0	0	0	0	0	0	1		0	0	2.04167	Female	Other acute hosp/ext care/rehab/geri ctr	H60A	Sunday	Y	0	0	1	1	1	2	H60	Costing 2014-2015	Dandenong	346047	8700000	42069.7	42071.8	2	2495.1
3572678	53	4.74	1.67578	1	13	0	0	0	0	0	0	0	0	0	0	0	1		0	0	1.66667	Male	Private residence/accommodation	G70B	Friday	N	0	0	1	0	1	2	G70	Costing 2014-2015	Dandenong	2100000	8700000	42060.7	42062.4	2	1506.95
3569625	88	4.74	2.32422	0	13	0	0	0	0	0	0	0	0	0	0	0	1		0	0	2.51	Female	Private residence/accommodation	G61B	Monday	N	0	0	1	0	1	2	G61	Costing 2014-2015	Dandenong	2200000	8700000	42056.1	42058.4	2	1855.75
3571684	42	4.74	1.09766	0	13	0	0	0	0	0	0	0	0	0	0	0	1		0	0	1.125	Female	Private residence/accommodation	H08B	Wednesday	N	0	0	1	0	1	2	H08	Costing 2014-2015	Dandenong	4600000	8700000	42059.4	42060.5	1	5279.03
3573649	49	4.74	14.9609	0	13	0	0	0	0	0	0	1	1	0	0	0	1		0	0	15	Female	Private residence/accommodation	G01A	Friday	Y	1	0	1	1	1	2	G01	Costing 2014-2015	Dandenong	2000000	8700000	42061.6	42076.5	15	44519.5
3565216	68	4.74	1.69141	1	13	0	0	0	0	0	0	0	0	0	0	0	1		0	0	1.01165	Male	Aged care residential facility	G61B	Monday	N	0	0	1	0	1	2	G61	Costing 2014-2015	Dandenong	2200000	8700000	42049.8	42051.5	2	2476.11
3571204	40	4.74	1.33203	0	13	0	0	0	0	0	0	0	0	0	0	0	1		0	0	6.24654	Male	Other acute hosp/ext care/rehab/geri ctr	H62A	Tuesday	N	0	0	1	1	1	2	H62	Costing 2014-2015	Dandenong	2100000	8700000	42058.5	42059.8	1	1303.52
3576318	23	4.74	2.83203	1	13	0	0	0	0	0	0	0	0	0	0	0	1		0	0	2.28305	Female	Private residence/accommodation	G47B	Thursday	N	0	0	1	0	1	2	G47	Costing 2014-2015	Dandenong	4500000	8700000	42065.9	42068.8	3	3297.49
3560126	68	4.74	5.39844	0	13	0	0	0	0	0	0	0	0	0	0	0	1		0	0	8.4803	Female	Private residence/accommodation	G46A	Thursday	Y	0	0	1	1	1	2	G46	Costing 2014-2015	Dandenong	2500000	8700000	42042.1	42047.5	5	6429.16
3560455	57	4.74	4.68359	1	13	0	0	0	0	0	0	0	0	0	0	0	1		0	0	4.19782	Male	Private residence/accommodation	G65A	Thursday	N	0	0	1	1	1	2	G65	Costing 2014-2015	Dandenong	7200000	8700000	42043.1	42047.7	4	7168.35
3576425	25	4.74	5.36719	1	13	0	0	0	0	0	0	0	0	0	0	0	1		0	0	3.16556	Male	Private residence/accommodation	H63B	Sunday	N	0	0	1	0	1	2	H63	Costing 2014-2015	Dandenong	2500000	8700000	42066.1	42071.4	5	5024.78
3571471	78	4.74	4.59766	0	13	0	0	0	0	0	0	0	0	0	0	0	1		0	0	9.34827	Male	Private residence/accommodation	G02A	Saturday	N	0	0	1	1	1	2	G02	Costing 2014-2015	Dandenong	4100000	8700000	42059.3	42063.9	4	9940.99
3577409	64	4.74	6.04688	1	13	0	0	0	1	0	0	0	1	0	0	0	1		0	0	6.04167	Female	Private residence/accommodation	G04B	Tuesday	N	1	0	1	0	1	2	G04	Costing 2014-2015	Dandenong	796145	8700000	42067.4	42073.5	6	12503.7
3566742	48	4.74	2.46094	1	13	0	0	0	0	0	0	0	0	0	0	0	1		0	0	1.80228	Male	Private residence/accommodation	G70B	Thursday	N	0	0	1	0	1	2	G70	Costing 2014-2015	Dandenong	4100000	8700000	42052.4	42054.9	2	3612.23
3572902	58	4.74	4.22656	0	13	0	0	0	0	0	0	0	0	0	0	0	1		0	0	4.25	Male	Private residence/accommodation	G01B	Monday	N	0	0	1	0	1	2	G01	Costing 2014-2015	Dandenong	7900000	8700000	42061.3	42065.5	4	14052.5
3577883	46	4.74	1.92969	0	13	0	0	0	0	0	0	0	0	0	0	0	1		0	0	2.34276	Female	Private residence/accommodation	G67A	Friday	N	0	0	1	1	1	2	G67	Costing 2014-2015	Dandenong	4300000	8700000	42067.6	42069.6	2	3552.14
3562897	75	4.74	10.0781	1	13	0	0	0	0	0	0	0	0	1	0	0	1		0	0	8.26251	Male	Private residence/accommodation	G48A	Saturday	Y	0	0	1	1	1	2	G48	Costing 2014-2015	Dandenong	2500000	8700000	42046.6	42056.7	10	10258.8
3563533	30	4.74	0.597656	1	13	0	0	0	0	0	0	0	0	1	0	0	1		0	0	0.583333	Male	Left against Medical Advice	G61B	Friday	N	0	0	1	0	1	2	G61	Costing 2014-2015	Dandenong	7900000	8700000	42047.4	42048	1	577.692
3564304	29	4.74	1.02344	0	13	0	0	0	0	0	0	0	0	0	0	0	1		0	0	1.04167	Male	Private residence/accommodation	D04Z	Saturday	N	0	0	1	0	1	2	D04	Costing 2014-2015	Dandenong	7900000	8700000	42048.5	42049.5	1	3389.19
3562600	70	4.74	6.17578	1	13	0	0	0	1	0	0	0	1	0	0	0	1		0	0	2.73058	Female	Private residence/accommodation	G65B	Tuesday	Y	1	0	1	0	1	2	G65	Costing 2014-2015	Dandenong	7000000	8700000	42046.4	42052.6	6	7986.26
3577169	94	4.74	7.16406	0	13	0	0	0	0	0	0	0	0	0	0	0	1		0	0	18.2491	Female	Aged care residential facility	G01A	Wednesday	Y	0	0	1	1	1	2	G01	Costing 2014-2015	Dandenong	7900000	8700000	42067.1	42074.3	7	15316.6
3570141	90	4.74	2.61719	0	13	0	0	0	0	0	0	0	0	0	0	0	1		0	0	2.92181	Female	Private residence/accommodation	G47B	Tuesday	Y	0	0	1	0	1	2	G47	Costing 2014-2015	Dandenong	7900000	8700000	42057	42059.6	3	3393.85
3578510	65	4.74	1.9375	0	13	0	0	0	0	0	0	0	0	0	0	0	1		0	0	2.22434	Female	Private residence/accommodation	G61B	Saturday	N	0	0	1	0	1	2	G61	Costing 2014-2015	Dandenong	4000000	8700000	42068.7	42070.6	2	1774.98
3567248	80	4.74	15.8789	1	13	0	0	0	3	2	0	1	6	0	0	0	1		0	0	15.875	Male	Private residence/accommodation	E40A	Thursday	Y	1	0	1	1	1	2	E40	Costing 2014-2015	Dandenong	7900000	8700000	42052.9	42068.7	16	44992.1
3563196	70	4.74	1.88672	0	13	0	0	0	0	0	0	0	0	0	0	0	1		0	0	4.58181	Male	Private residence/accommodation	G61A	Friday	N	0	0	1	1	1	2	G61	Costing 2014-2015	Dandenong	4400000	8700000	42046.6	42048.5	2	1865.42
3572909	75	4.74	6.30859	0	13	0	0	0	0	0	0	0	0	0	0	0	1		0	0	6.33333	Female	Private residence/accommodation	G10A	Wednesday	N	0	0	1	1	1	2	G10	Costing 2014-2015	Dandenong	4000000	8700000	42061.3	42067.6	6	15079.5
3562961	59	4.74	149.152	0	13	0	0	0	0	0	0	0	0	0	0	0	1		18.9486	27286	130.218	Female	Private residence/accommodation		Friday	Y	0	0	1	0	1	2
3574904	70	4.74	4.89453	0	13	0	0	0	0	0	0	0	0	1	0	0	1		0	0	5.13323	Male	Private residence/accommodation	Z61A	Thursday	Y	0	0	1	1	1	2	Z61	Costing 2014-2015	Dandenong	2500000	8700000	42063.6	42068.5	5	6218.61
3570589	71	4.74	0.746094	1	13	0	0	0	0	0	0	0	0	0	0	0	1		0	0	0.708333	Male	Private residence/accommodation	G47C	Monday	N	0	0	1	0	1	2	G47	Costing 2014-2015	Dandenong	2200000	8700000	42058.1	42058.8	1	3444.82
3570123	84	4.74	6.71875	1	13	0	0	0	0	0	0	0	0	0	0	0	1		0	0	5.52698	Male	Private residence/accommodation	G48A	Saturday	Y	0	0	1	1	1	2	G48	Costing 2014-2015	Dandenong	2100000	8700000	42056.8	42063.5	7	6687.7
3572886	39	4.74	0.839844	0	13	0	0	0	0	0	0	0	0	1	0	0	1		0	0	4.83634	Male	Private residence/accommodation	H62A	Thursday	N	0	0	1	1	1	2	H62	Costing 2014-2015	Dandenong	7200000	8700000	42060.7	42061.5	1	1464.82
3578830	57	4.74	4.50781	0	13	0	0	0	0	0	0	0	0	0	0	0	1		0	0	8.50403	Female	Private residence/accommodation	G46A	Tuesday	N	0	0	1	1	1	2	G46	Costing 2014-2015	Dandenong	4300000	8700000	42069.1	42073.7	4	4777.82
3567774	38	4.74	0.789063	0	13	0	0	0	0	0	0	0	0	1	0	0	1		0	0	1.19272	Female	Private residence/accommodation	N09Z	Thursday	N	0	0	1	0	1	2	N09	Costing 2014-2015	Dandenong	4700000	8700000	42053.6	42054.4	1	2637.46
3567736	50	4.74	29.8945	1	13	0	0	0	9	0	0	4	13	1	0	0	1		0	0	29.875	Male	Private residence/accommodation	Q62A	Friday	Y	1	0	1	1	1	2	Q62	Costing 2014-2015	Dandenong	2300000	8700000	42053.6	42083.5	30	72484.4
3571227	43	4.74	8.02344	0	13	0	0	0	0	0	0	0	0	0	0	0	1		0	0	8.04167	Male	Private residence/accommodation	G02B	Tuesday	Y	0	0	1	0	1	2	G02	Costing 2014-2015	Dandenong	7900000	8700000	42058.5	42066.6	8	9608.66
3570537	54	4.74	3.19531	0	13	0	0	0	0	0	0	0	0	0	0	0	1		0	0	3.20833	Male	Private residence/accommodation	G04A	Thursday	Y	0	0	1	1	1	2	G04	Costing 2014-2015	Dandenong	7100000	8700000	42058.3	42061.5	3	6218.28
3564000	38	4.74	1.13672	1	13	0	0	0	0	0	0	0	0	0	0	0	1		0	0	1.125	Male	Private residence/accommodation	G10B	Saturday	N	0	0	1	0	1	2	G10	Costing 2014-2015	Dandenong	7900000	8700000	42048.3	42049.4	1	4619.83
3568033	70	4.74	25.3125	1	13	0	0	0	0	0	0	0	0	0	0	0	1		21.0014	30242	4.29028	Male	Private residence/accommodation	G04C	Monday	N	0	0	1	0	1	2	G04	Costing 2014-2015	Dandenong	2000000	8700000	42054.3	42079.6	11	12914.9
3567779	62	4.74	3.94141	1	13	0	0	0	0	0	0	0	0	0	0	0	1		0	0	1.77116	Male	Private residence/accommodation	G11Z	Sunday	N	0	0	1	0	1	2	G11	Costing 2014-2015	Dandenong	4600000	8700000	42053.7	42057.7	4	5508.74
3565323	66	4.74	1.35547	0	13	0	0	0	0	0	0	0	0	0	0	0	1		0	0	2.22434	Female	Private residence/accommodation	G61B	Monday	N	0	0	1	0	1	2	G61	Costing 2014-2015	Dandenong	2400000	8700000	42050.1	42051.5	1	1226.34
3568971	30	4.74	35.3047	1	13	0	0	0	0	0	0	0	0	0	0	0	1		24.9868	35981	10.3049	Male	Private residence/accommodation	G01A	Friday	Y	0	0	1	1	1	2	G01	Costing 2014-2015	Dandenong	4100000	8700000	42055.3	42090.6	21	26837.9
3575379	49	4.74	72.9336	1	13	0	0	0	0	0	0	0	0	0	0	0	1		57.9257	83413	15.0326	Male	Private residence/accommodation	M06A	Wednesday	Y	0	0	1	1	1	2	M06
3560787	63	4.74	52.3203	0	13	0	0	0	3	0	0	2	5	0	0	0	1		0	0	52.3333	Male	Other acute hosp/ext care/rehab/geri ctr	B82B	Wednesday	Y	1	0	1	0	1	2	B82
3565514	77	4.74	2.84766	0	13	0	0	0	0	0	0	0	0	0	0	0	1		0	0	2.875	Female	Private residence/accommodation	G11Z	Wednesday	N	0	0	1	0	1	2	G11	Costing 2014-2015	Dandenong	2000000	8700000	42050.6	42053.5	3	6565.17
3575928	20	4.74	2.14453	1	13	0	0	0	0	0	0	0	0	0	0	0	1		0	0	1.02119	Female	Private residence/accommodation	O05Z	Wednesday	N	0	0	1	0	1	2	O05	Costing 2014-2015	Dandenong	800743	8700000	42065.6	42067.7	2	3494.44
3564894	20	4.74	1.60156	1	13	0	0	0	0	0	0	0	0	0	0	0	1		0	0	0.875916	Female	Private residence/accommodation	X60B	Sunday	N	0	0	1	0	1	2	X60	Costing 2014-2015	Dandenong	4500000	8700000	42049.2	42050.8	1	2270.52
3560113	71	4.74	7.51953	1	13	0	0	0	0	0	0	0	0	0	0	0	1		0	0	3.38855	Male	Private residence/accommodation	H63B	Saturday	N	0	0	1	0	1	2	H63	Costing 2014-2015	Dandenong	424386	8700000	42042	42049.5	7	9309.92
3568905	19	4.74	1.70703	1	13	0	0	0	0	0	0	0	0	1	0	0	1		0	0	1.21268	Female	Private residence/accommodation	G70B	Saturday	Y	0	0	1	0	1	2	G70	Costing 2014-2015	Dandenong	4500000	8700000	42054.9	42056.6	2	1666.98
3562546	82	4.74	2.26172	0	13	0	0	0	0	0	0	0	0	0	0	0	1		0	0	6.78091	Male	Private residence/accommodation	H08A	Friday	Y	0	0	1	1	1	2	H08	Costing 2014-2015	Dandenong	2100000	8700000	42046.3	42048.6	2	7419.69
3565144	86	4.74	17.9063	1	13	0	0	0	0	0	0	0	0	0	0	0	1		11.9326	17183	1.79639	Male	Private residence/accommodation	X63B	Wednesday	Y	0	0	1	0	1	2	X63	Costing 2014-2015	Dandenong	4500000	8700000	42049.6	42067.5	18	10955.6
3567062	45	4.74	2.17188	1	13	0	0	0	0	0	0	0	0	0	0	0	1		0	0	2.16667	Female	Other acute hosp/ext care/rehab/geri ctr	H62B	Thursday	N	0	0	1	0	1	2	H62	Costing 2014-2015	Dandenong	2200000	8700000	42052.3	42054.4	2	2402.93
3563337	68	4.74	5.19531	1	13	0	0	0	0	0	0	0	0	0	0	0	1		0	0	5.16667	Female	Private residence/accommodation	G01A	Tuesday	Y	0	0	1	1	1	2	G01	Costing 2014-2015	Dandenong	7200000	8700000	42047.3	42052.5	5	18530.6
3564063	62	4.74	31.5938	1	13	1	0	0	4	0	0	3	8	0	0	0	1		0	0	9.58521	Female	Death	H60A	Monday	Y	1	0	1	1	1	2	H60	Costing 2014-2015	Dandenong	4700000	8700000	42048.3	42079.9	31	58037.3
3575149	56	4.74	10.8438	1	13	0	0	0	0	0	0	0	0	0	0	0	1		0	0	5.81138	Male	Private residence/accommodation	J64A	Wednesday	N	0	0	1	1	1	2	J64	Costing 2014-2015	Dandenong	4600000	8700000	42063.9	42074.7	11	16100.5
3567852	65	4.74	0.335938	1	13	0	0	0	0	0	0	0	0	1	0	0	1		0	0	0.333333	Female	Private residence/accommodation	D60C	Wednesday	N	0	0	1	0	1	2	D60	Costing 2014-2015	Dandenong	854143	8700000	42053.3	42053.7	1	1863.8
3566501	45	4.74	16.4844	0	13	0	0	0	2	0	0	0	2	0	0	0	1		0	0	16.5	Male	Private residence/accommodation	G02A	Thursday	Y	1	0	1	1	1	2	G02	Costing 2014-2015	Dandenong	7800000	8700000	42052.3	42068.8	16	41073.3
3574806	65	4.74	5.58594	0	13	0	0	0	0	0	0	0	0	0	0	0	1		0	0	5.73811	Female	Private residence/accommodation	G65A	Thursday	Y	0	0	1	1	1	2	G65	Costing 2014-2015	Dandenong	4600000	8700000	42063	42068.6	5	6746.58
3577240	48	4.74	1.27344	0	13	0	0	0	0	0	0	0	0	0	0	0	1		0	0	1.29167	Female	Private residence/accommodation	G11Z	Thursday	N	0	0	1	0	1	2	G11	Costing 2014-2015	Dandenong	7900000	8700000	42067.3	42068.6	1	5532.51
3564233	63	4.74	1.15234	0	13	0	0	0	0	0	0	0	0	0	0	0	1		0	0	1.16667	Female	Other acute hosp/ext care/rehab/geri ctr	L09B	Saturday	N	0	0	1	0	1	2	L09	Costing 2014-2015	Dandenong	4200000	8700000	42048.4	42049.6	1	7875.28
3562251	36	4.74	0.304688	1	13	0	0	0	0	0	0	0	0	0	0	0	1		0	0	0.291667	Female	Private residence/accommodation	G61A	Tuesday	N	0	0	1	1	1	2	G61	Costing 2014-2015	Dandenong	4300000	8700000	42045.4	42045.7	1	577.616
3563928	88	4.74	1.07422	0	13	0	0	0	0	0	0	0	0	0	0	0	1		0	0	1.08333	Male	Private residence/accommodation	G46B	Friday	N	0	0	1	0	1	2	G46	Costing 2014-2015	Dandenong	2500000	8700000	42047.5	42048.6	1	3394.02
3562985	36	4.74	1.60938	0	13	0	0	0	0	0	0	0	0	0	0	0	1		0	0	6.24654	Male	Other acute hosp/ext care/rehab/geri ctr	H62A	Friday	N	0	0	1	1	1	2	H62	Costing 2014-2015	Dandenong	7700000	8700000	42046.8	42048.4	2	2297.23
3572250	47	4.74	4.48438	0	13	0	0	0	0	0	0	0	0	1	0	0	1		0	0	4.5	Male	Private residence/accommodation	G66A	Sunday	Y	0	0	1	1	1	2	G66	Costing 2014-2015	Dandenong	4100000	8700000	42060.1	42064.6	4	4997.34
3595745	47	2.84	3.6875	0	14	0	0	0	1	0	0	0	1	0	0	0	1		0	0	8.62587	Male	Private residence/accommodation	I27A	Friday	N	1	0	1	1	1	2	I27
3590655	56	2.84	7.27344	0	14	1	0	0	0	0	0	0	0	0	0	0	1		0	0	7.29167	Male	Death	T60A	Thursday	Y	0	0	1	1	1	2	T60
3581106	32	2.84	1.66016	0	14	0	0	0	0	0	0	0	0	0	0	0	1		0	0	3.04224	Female	Private residence/accommodation	H08B	Wednesday	N	0	0	1	0	1	2	H08	Costing 2014-2015	Dandenong	4500000	8700000	42072.8	42074.5	2	6164.85
3592105	81	2.84	3.48828	0	14	0	0	0	0	0	0	0	0	0	0	0	1		0	0	9.41809	Female	Other acute hosp/ext care/rehab/geri ctr	H63A	Tuesday	N	0	0	1	1	1	2	H63	Costing 2014-2015	Dandenong	2500000	8700000	42083.8	42087.3	4	3447.01
3594754	21	2.84	6.03516	0	14	0	0	0	0	0	0	0	0	0	0	0	1		0	0	6.04167	Male	Private residence/accommodation	G48B	Saturday	Y	0	0	1	0	1	2	G48
3593977	82	2.84	30.8008	1	14	0	0	0	0	0	0	1	1	0	0	0	1		0	0	30.7917	Female	Other acute hosp/ext care/rehab/geri ctr	H40A	Monday	Y	1	0	1	1	1	2	H40
3584856	65	2.84	10.7852	0	14	0	0	0	1	0	0	1	2	0	0	0	1		0	0	10.7917	Male	Private residence/accommodation	E40A	Wednesday	Y	1	0	1	1	1	2	E40	Costing 2014-2015	Dandenong	2200000	8700000	42077.8	42088.6	11	21478.6
3590523	43	2.84	1.77344	1	14	0	0	0	0	0	0	0	0	0	0	0	1		0	0	0.191759	Female	Private residence/accommodation	O66B	Friday	N	0	0	1	0	1	2	O66	Costing 2014-2015	Dandenong	2500000	8700000	42088.9	42090.7	2	2093.91
3587387	34	2.84	1.91797	0	14	0	0	0	0	0	0	0	0	0	0	0	1		0	0	2.64639	Male	Private residence/accommodation	G07A	Friday	N	0	0	1	1	1	2	G07	Costing 2014-2015	Dandenong	7900000	8700000	42081.8	42083.7	2	5533.11
3588466	88	2.84	3.20313	0	14	0	0	0	1	0	0	0	1	0	0	0	1		0	0	5.7278	Female	Private residence/accommodation	G65A	Monday	N	1	0	1	1	1	2	G65	Costing 2014-2015	Dandenong	2100000	8700000	42083.2	42086.4	3	3277.88
3587373	25	2.84	1.83203	0	14	0	0	0	0	0	0	0	0	0	0	0	1		0	0	1.83333	Male	Private residence/accommodation	G66A	Friday	N	0	0	1	1	1	2	G66	Costing 2014-2015	Dandenong	2400000	8700000	42081.5	42083.4	2	3120.57
3588690	45	2.84	7.44141	1	14	0	0	0	0	0	0	0	0	0	0	0	1		0	0	7.41667	Male	Private residence/accommodation	G02A	Friday	Y	0	0	1	1	1	2	G02	Costing 2014-2015	Dandenong	4700000	8700000	42083.2	42090.7	7	12082.3
3580867	64	2.84	4.83984	1	14	0	0	0	0	0	0	0	0	0	0	0	1		0	0	2.05307	Male	Private residence/accommodation	G47B	Saturday	Y	0	0	1	0	1	2	G47	Costing 2014-2015	Dandenong	2300000	8700000	42072.7	42077.5	5	5512.95
3583874	20	2.84	3.00781	1	14	0	0	0	0	0	0	0	0	0	0	0	1		0	0	3	Female	Private residence/accommodation	B67A	Monday	Y	0	0	1	1	1	2	B67	Costing 2014-2015	Dandenong	840086	8700000	42076.5	42079.5	3	5989.25
3589328	70	2.84	1.10938	0	14	0	0	0	0	0	0	0	0	0	0	0	1		0	0	1.125	Female	Private residence/accommodation	H08B	Wednesday	N	0	0	1	0	1	2	H08	Costing 2014-2015	Dandenong	2000000	8700000	42087.3	42088.4	1	5130.73
3587605	53	2.84	2.79297	0	14	0	0	0	0	0	0	0	0	0	0	0	1		0	0	5.94244	Female	Private residence/accommodation	H08A	Saturday	N	0	0	1	1	1	2	H08	Costing 2014-2015	Dandenong	2200000	8700000	42081.9	42084.7	3	7119.23
3589299	39	2.84	1.62109	0	14	0	0	0	0	0	0	0	0	0	0	0	1		0	0	1.67278	Male	Private residence/accommodation	G61B	Wednesday	N	0	0	1	0	1	2	G61	Costing 2014-2015	Dandenong	7400000	8700000	42086.8	42088.4	2	1616.63
3594011	77	2.84	4.57813	1	14	0	0	0	0	0	0	0	0	0	0	0	1		0	0	2.19819	Male	Other acute hosp/ext care/rehab/geri ctr	G61B	Wednesday	N	0	0	1	0	1	2	G61
3581663	68	2.84	7.8125	0	14	0	0	0	0	0	0	0	0	0	0	0	1		0	0	9.02464	Male	Private residence/accommodation	H43A	Wednesday	Y	0	0	1	1	1	2	H43	Costing 2014-2015	Dandenong	2500000	8700000	42073.8	42081.6	8	9360.9
3590471	44	2.84	1.13672	1	14	0	0	0	0	0	0	0	0	0	0	0	1		0	0	1.125	Male	Private residence/accommodation	G47B	Wednesday	N	0	0	1	0	1	2	G47	Costing 2014-2015	Dandenong	343950	8700000	42087.6	42088.8	1	2022.34
3591717	39	2.84	4.67188	0	14	0	0	0	0	0	0	0	0	1	0	0	1		0	0	5.83225	Male	Private residence/accommodation	H62A	Friday	N	0	0	1	1	1	2	H62	Costing 2014-2015	Dandenong	7200000	8700000	42085.7	42090.4	5	4631.94
3582305	48	2.84	9.00781	0	14	0	0	0	0	0	0	0	0	0	0	0	1		0	0	10.417	Female	Private residence/accommodation	G04A	Friday	Y	0	0	1	1	1	2	G04	Costing 2014-2015	Dandenong	2300000	8700000	42074.6	42083.6	9	13892.4
3593691	46	2.84	80.875	1	14	0	0	0	0	0	0	0	0	0	0	0	1		42.0132	60499	15.8684	Male	Private residence/accommodation	T01A	Friday	Y	0	0	1	1	1	2	T01
3592633	50	2.84	1.25391	1	14	0	0	0	0	0	0	0	0	0	0	0	1		0	0	1.25	Male	Private residence/accommodation	F74B	Tuesday	N	0	0	1	0	1	2	F74	Costing 2014-2015	Dandenong	2200000	8700000	42086.3	42087.5	1	2131.48
3594544	66	2.84	2.77734	0	14	0	0	0	0	0	0	0	0	0	0	0	1		0	0	7.41913	Male	Private residence/accommodation	G48A	Tuesday	N	0	0	1	1	1	2	G48	Costing 2014-2015	Dandenong	4700000	8700000	42091.7	42094.5	3	2766.48
3594525	40	2.84	3.61328	1	14	0	0	0	0	0	0	0	0	1	0	0	1		0	0	2.96547	Female	Private residence/accommodation	H64A	Wednesday	N	0	0	1	1	1	2	H64
3592503	69	2.84	17.7617	0	14	0	0	0	0	0	0	0	0	0	0	0	1		0	0	26.1842	Female	Private residence/accommodation	A06B	Thursday	Y	0	0	1	0	1	2	A06
3593828	69	2.84	4.76953	1	14	0	0	0	0	0	0	0	0	0	0	0	1		0	0	3.02675	Female	Private residence/accommodation	G70B	Wednesday	Y	0	0	1	0	1	2	G70
3583567	25	2.84	6.26172	1	14	0	0	0	0	0	0	0	0	0	0	0	1		0	0	2.08687	Female	Private residence/accommodation	G70B	Thursday	N	0	0	1	0	1	2	G70	Costing 2014-2015	Dandenong	733673	8700000	42076.2	42082.5	6	5072.62
3589229	74	2.84	3.19141	0	14	0	0	0	0	0	0	0	0	0	0	0	1		0	0	3.85623	Female	Private residence/accommodation	G46B	Wednesday	Y	0	0	1	0	1	2	G46	Costing 2014-2015	Dandenong	2200000	8700000	42085.3	42088.5	3	6028.74
3592608	76	2.84	7.24609	0	14	0	0	0	0	0	0	0	0	0	0	0	1		0	0	7.25	Female	Private residence/accommodation	G01A	Monday	Y	0	0	1	1	1	2	G01	Costing 2014-2015	Dandenong	4300000	8700000	42086.3	42093.5	7	17095
3593208	29	2.84	6.21875	1	14	0	0	0	0	0	0	0	0	1	0	0	1		0	0	6.20833	Male	Private residence/accommodation	G47A	Monday	Y	0	0	1	1	1	2	G47	Costing 2014-2015	Dandenong	4600000	8700000	42087.5	42093.7	6	7772.57
3590479	72	2.84	13.2422	0	14	0	0	0	0	0	0	0	0	0	0	0	1		0	0	13.25	Female	Private residence/accommodation	G01A	Wednesday	Y	0	0	1	1	1	2	G01
3590520	19	2.84	5.71094	1	14	0	0	0	0	0	0	0	0	0	0	0	1		0	0	0.96992	Female	Private residence/accommodation	G61B	Tuesday	N	0	0	1	0	1	2	G61	Costing 2014-2015	Dandenong	790208	8700000	42089	42094.7	6	4734.37
3593406	25	2.84	1.70703	0	14	0	0	0	0	0	0	0	0	0	0	0	1		0	0	1.70833	Male	Private residence/accommodation	H60A	Sunday	N	0	0	1	1	1	2	H60	Costing 2014-2015	Dandenong	4600000	8700000	42083.9	42085.6	2	1613.68
3586915	25	2.84	4.38281	1	14	0	0	0	0	0	0	0	0	0	0	0	1		0	0	4.375	Male	Private residence/accommodation	G02B	Sunday	N	0	0	1	0	1	2	G02	Costing 2014-2015	Dandenong	4400000	8700000	42081.3	42085.7	4	12963.1
3581841	59	2.84	8.61719	1	14	0	0	0	0	0	0	0	0	0	0	0	1		0	0	6.5251	Male	Other acute hosp/ext care/rehab/geri ctr	J65A	Thursday	Y	0	0	1	1	1	2	J65	Costing 2014-2015	Dandenong	848381	8700000	42073.8	42082.4	9	10061.6
3590765	48	2.84	1.76563	1	14	0	0	0	0	0	0	0	0	0	0	0	1		0	0	1.54364	Male	Private residence/accommodation	J64B	Monday	N	0	0	1	0	1	2	J64	Costing 2014-2015	Dandenong	7700000	8700000	42084.9	42086.6	2	3697.92
3593959	55	2.84	4.65234	0	14	0	0	0	0	0	0	0	0	0	0	0	1		0	0	4.66667	Male	Private residence/accommodation	G48A	Wednesday	N	0	0	1	1	1	2	G48
3590582	65	2.84	0.605469	0	14	0	0	0	0	0	0	0	0	0	0	0	1		0	0	3.02675	Female	Private residence/accommodation	G70B	Thursday	N	0	0	1	0	1	2	G70	Costing 2014-2015	Dandenong	2100000	8700000	42088.9	42089.5	1	1347.31
3588900	90	2.84	7.03906	0	14	0	0	0	0	0	0	0	0	0	0	0	1		0	0	7.04167	Female	Private residence/accommodation	N11Z	Friday	N	0	0	1	0	1	2	N11	Costing 2014-2015	Dandenong	2200000	8700000	42083.6	42090.7	7	7626.95
3585912	80	2.84	3.57031	0	14	0	0	0	0	0	0	0	0	0	0	0	1		0	0	6.04369	Female	Private residence/accommodation	G46B	Friday	N	0	0	1	0	1	2	G46	Costing 2014-2015	Dandenong	2500000	8700000	42079.9	42083.4	4	4382.03
3588735	18	2.84	1.15625	0	14	0	0	0	0	0	0	0	0	0	0	0	1		0	0	1.16667	Male	Private residence/accommodation	J09Z	Saturday	N	0	0	1	0	1	2	J09	Costing 2014-2015	Dandenong	7900000	8700000	42083.5	42084.6	1	3064.84
3595339	73	2.84	5.8125	0	14	0	0	0	0	0	0	0	0	0	0	0	1		0	0	7.35869	Male	Private residence/accommodation	F62A	Sunday	N	0	0	1	1	1	2	F62
3594195	51	2.84	20.2227	1	14	0	0	0	0	0	0	0	0	0	0	0	1		0	0	14.9334	Male	Other acute hosp/ext care/rehab/geri ctr	H60A	Friday	Y	0	0	1	1	1	2	H60
3589871	52	2.84	4.02344	1	14	0	0	0	0	0	0	0	0	0	0	0	1		0	0	2.69464	Female	Private residence/accommodation	G67A	Sunday	Y	0	0	1	1	1	2	G67	Costing 2014-2015	Dandenong	4500000	8700000	42088.6	42092.6	4	4552.17
3595341	50	2.84	0.835938	0	14	0	0	0	0	0	0	0	0	0	0	0	1		0	0	1.40105	Male	Private residence/accommodation	G67B	Tuesday	N	0	0	1	0	1	2	G67	Costing 2014-2015	Dandenong	4500000	8700000	42093.7	42094.5	1	807.398
3590543	52	2.84	3.50781	1	14	0	0	0	0	0	0	0	0	0	0	0	1		0	0	1.84095	Female	Private residence/accommodation	G61B	Sunday	N	0	0	1	0	1	2	G61	Costing 2014-2015	Dandenong	2400000	8700000	42089	42092.5	4	3670.26
3587952	57	2.84	1.94531	0	14	0	0	0	0	0	0	0	0	0	0	0	1		0	0	6.05212	Male	Private residence/accommodation	H63A	Saturday	N	0	0	1	1	1	2	H63	Costing 2014-2015	Dandenong	4700000	8700000	42082.5	42084.4	2	2961.81
3580905	78	2.84	1.1875	0	14	0	0	0	0	0	0	0	0	0	0	0	1		0	0	1.20833	Male	Private residence/accommodation	G46B	Tuesday	N	0	0	1	0	1	2	G46	Costing 2014-2015	Dandenong	4300000	8700000	42072.6	42073.8	1	3642.15
3584730	42	2.84	16.1328	0	14	0	0	0	0	0	0	0	0	1	0	0	1		5.05625	7281	11.0688	Male	Private residence/accommodation	I72A	Monday	Y	0	0	1	1	1	2	I72	Costing 2014-2015	Dandenong	7200000	8700000	42077.7	42093.8	16	12655
[truncated: 25,560 more rows]
